# Supplementary material for: p38γ and p38δ modulate innate immune response by regulating MEF2D activation
Source: eLife. 2023 Jul 17;12:e86200. doi: 10.7554/eLife.86200 (PMC10400073; doi:10.7554/eLife.86200)
Supplement: Figure 4—source data 1. [file elife-86200-fig4-data1.xlsx]

## Sheet: Sheet1
p38g/dKO v WT comparison
Protein	Gene	Position	Sequence
Nuclear factor NF-kappa-B p100/p52 subunit	Nfkb2	425	SRRDTDAGEGAEEPRTPPEAPQGEPQALDTL
Myocyte-specific enhancer factor 2D	Mef2d	437	TVTTHPHISIKSEPVSPSRERSPAPPPPAVF
Probable C-mannosyltransferase DPY19L1	Dpy19l1	46	SEVDAGELGSERTPPSPGRRGAAGRKGPRAG
Ataxin-2-like protein	Atxn2l	407	PGSEARGINGGPSRMSPKAQRPLRGAKTLSS
p38g/dKIKO v WT comparison
Protein	Gene	Position	Sequence
Putative adenosylhomocysteinase 3	Ahcyl2	109	HHQHQRHRDGGEALVSPDGTVTEAPRTVKKQ
Myocyte-specific enhancer factor 2D	Mef2d	437	TVTTHPHISIKSEPVSPSRERSPAPPPPAVF
SLAM family member 7	Slamf7	313	PNTFYSTVQIPKVVKSPSSLPAKPLVPRSLS
RUN and FYVE domain-containing protein 1	Rufy1	52	ESGEAFEIVDRSQLPSPGELRSASRPRVADS
Stathmin	Stmn1	25	ELEKRASGQAFELILSPRSKESVPDFPLSPP
Tumor protein D52	Tpd52	170	SVGSVITKKLEDVKNSPTFKSFEEKVENLKS
Uncharacterized protein KIAA1522	Kiaa1522	909	IFSKGTKKLQLERPVSPEAQADLQRNLVAEL
Histone-lysine N-methyltransferase 2D	Kmt2d	2299	FKAPLTPRASQVEPQSPGLGLRAQEPPPAQA
ADP-ribosylation factor-like protein 6-interacting protein 6	Arl6ip6	80	SETKRAPLLPRVGDGSPVLPDKRNGIFPATA
Lamin-B1	Lmnb1	21	PVQQQRAGSRASAPATPLSPTRLSRLQEKEE
MAP kinase-interacting serine/threonine-protein kinase 1	Mknk1	344	QHPWVQGQAPERGLPTPQVLQRNSSTMDLTL
