# Supplementary material for: p38γ and p38δ modulate innate immune response by regulating MEF2D activation
Source: eLife journal article supplement (doi:10.7554/elife.86200), 2023-07-17
Supplement: figures [file elife-86200-figures-v2.pdf]

---

## Figures and figure supplements

p38 $\gamma$  and p38 $\delta$  modulate innate immune response by regulating MEF2D activation

**Alejandra Escós and Ester Diaz-Mora et al.**

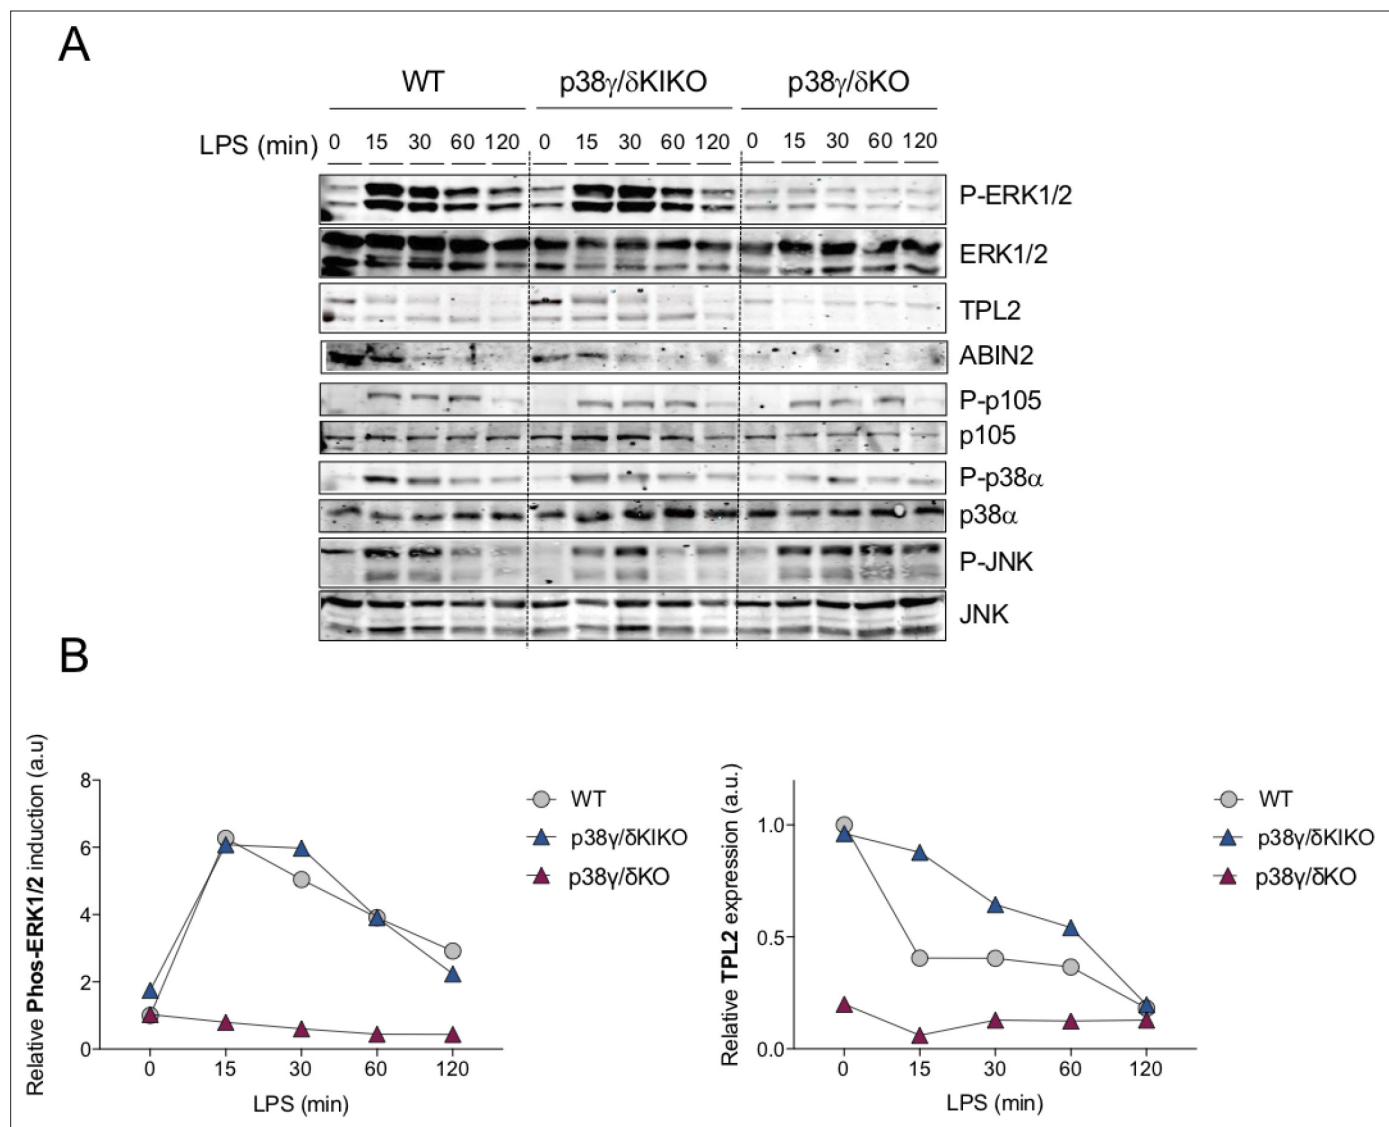

**Figure 1.** Lipopolysaccharide (LPS)-induced ERK1/2 activation in p38 $\gamma$ /δKIKO macrophages. **(A)** Bone marrow-derived macrophage (BMDM) from wild-type (WT), p38 $\gamma$ /δKO, and p38 $\gamma$ /δKIKO mice was exposed to LPS (100 ng/ml) for the indicated times. Cell lysates (30  $\mu$ g) were immunoblotted with the indicated antibodies to active phosphorylated p38 $\alpha$  (P-p38 $\alpha$ ), JNK1/2 (P-JNK), and ERK1/2 (P-ERK1/2). Phosphorylated p105 (P-p105) and total protein levels of p38 $\alpha$ , JNK1/2 (JNK), ERK1/2, TPL2, and p105 were also measured in the same lysates. Representative blots of two independent experiments with similar results are shown. **(B)** Intensity of the bands corresponding to Phos-ERK1/2 and TPL2 (panel A) was quantified. Data relative to WT Time 0 min are shown.

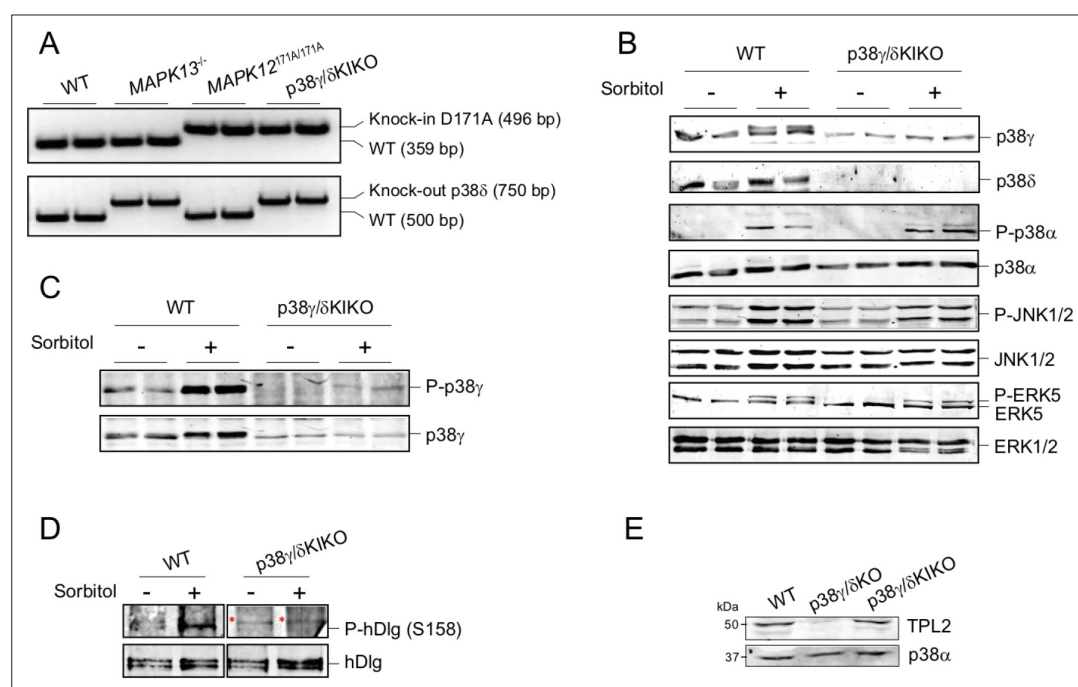

**Figure 1—figure supplement 1.** Characterization of the p38γ/δKIKO mouse. **(A)** Samples of genomic DNA from wild-type (WT), *Mapk13*<sup>-/-</sup>, *Mapk12*<sup>T171A/T171A</sup>, and p38γ/δKIKO purified from tail biopsy were used as templates for PCR as described in methods. **(B)** WT and p38γ/δKIKO mouse embryonic fibroblasts (MEFs) were exposed to 0.5 M sorbitol (15 min), activation and expression of MAPK were examined in immunoblotted lysates (30 μg) using phospho-specific and specific antibodies for each indicated protein. **(C)** MEFs were treated as in **(B)**; endogenous p38γ immunoprecipitated with anti-p38γ from 2 mg cell lysate and immunoblotted with the p38 phospho-specific antibody, which recognizes all phosphorylated p38 isoforms. **(D)** Endogenous hDlg was immunoprecipitated with anti-hDlg from 1 mg MEF lysate (treated as in **(B)**). Pellets were immunoblotted with the indicated antibodies. Red (\*) mark unspecific protein bands. **(E)** Extracts from WT, p38γ/δKO, and p38γ/δKIKO peritoneal macrophages were immunoblotted using specific antibodies for TPL2 and p38α. Representative blots of two independent experiments are shown in all panels.

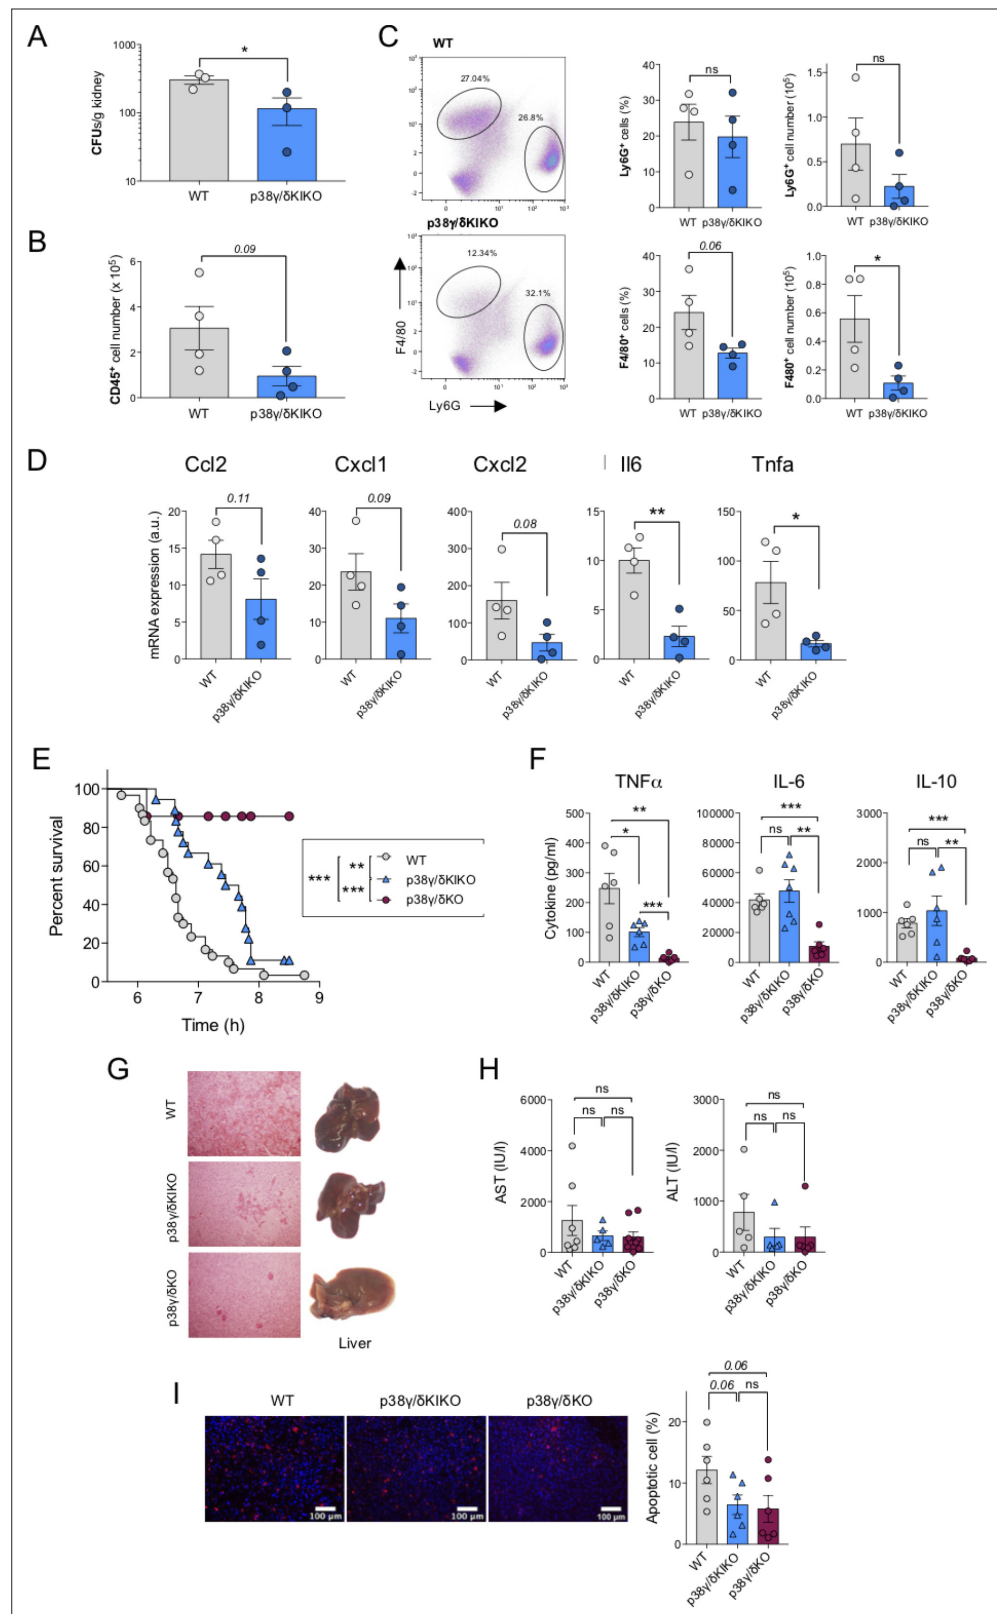

**Figure 2.** Reduced inflammation in p38γ/δ KIKO mice in response to septic shock. **(A)** Wild-type (WT) and p38γ/δKIKO mice were intravenously injected with  $1 \times 10^5$  CFU of *C. albicans*. Kidney fungal load was determined 3 days after infection. Each symbol represents an individual mouse. Figure shows mean  $\pm$  standard error of the mean (SEM), ns not significant; \* $p \leq 0.05$ , relative to WT kidney cells. Kidney cells were stained with **(B)** anti-CD45, Figure 2 continued on next page

Figure 2 continued

(C) anti -Ly6G and -F4/80 antibodies and positive cells analysed by flow cytometry. CD45<sup>+</sup> cells were gated and -F4/80<sup>+</sup> and -Ly6G<sup>+</sup> cells analysed by flow cytometry. Representative profiles are shown. Each symbol represents an individual mouse. Histograms shows mean  $\pm$  SEM, ns not significant; \* $p \leq 0.05$ , relative to WT kidney cells. (D) Mice were treated as in (A) and the mRNA levels of indicated genes in the kidney were measured by quantitative PCR (qPCR) 3 days after infection. Each symbol represents an individual mouse. Figure shows mean  $\pm$  SEM ( $n = 4$  mice/condition). ns, not significant, \* $p \leq 0.05$ , \*\* $p \leq 0.01$ . (E) WT ( $n = 31$ ), p38 $\gamma$ / $\delta$ KO ( $n = 18$ ), and p38 $\gamma$ / $\delta$ KIKO ( $n = 19$ ) mice were injected with lipopolysaccharide (LPS) (50  $\mu$ g/kg) and D-Gal (1 g/kg), and survival was monitored for up to 9 hr. Graph shows % survival at the indicated times. \*\* $p \leq 0.01$ , \*\*\* $p \leq 0.001$ . (F) Serum from mice (E) was collected 2 hr after LPS/D-Gal injection, and TNF $\alpha$ , IL-6, and IL10 were measured in a Luminex cytokine assay. Each symbol represents an individual mouse. Figure shows mean  $\pm$  SEM ( $n = 6$ –7 mice). ns, not significant; \* $p \leq 0.05$ , \*\* $p \leq 0.01$ , \*\*\* $p \leq 0.001$ . (G) Livers were collected 6 hr after LPS/D-Gal injection. Panels show haematoxylin and eosin (H&E) stained liver sections (left) and whole livers (right). (H) Serum ALT (alanine transaminase) and AST (aspartate aminotransferase) activity at 6 hr after LPS/D-Gal injection. Each symbol represents an individual mouse. Figure shows mean  $\pm$  SEM ( $n = 5$ –7 mice). ns, not significant. (I) Apoptotic TUNEL positive (red) and total nuclei (Hoechst stained-blue) cells were counted using ImageJ programme and the percentage of apoptotic cells calculated. 25 sections per mouse were scored. Representative TUNEL stained liver sections are shown, and figure shows mean  $\pm$  SEM ( $n = 6$  mice). ns, not significant. Each symbol represents an individual mouse.

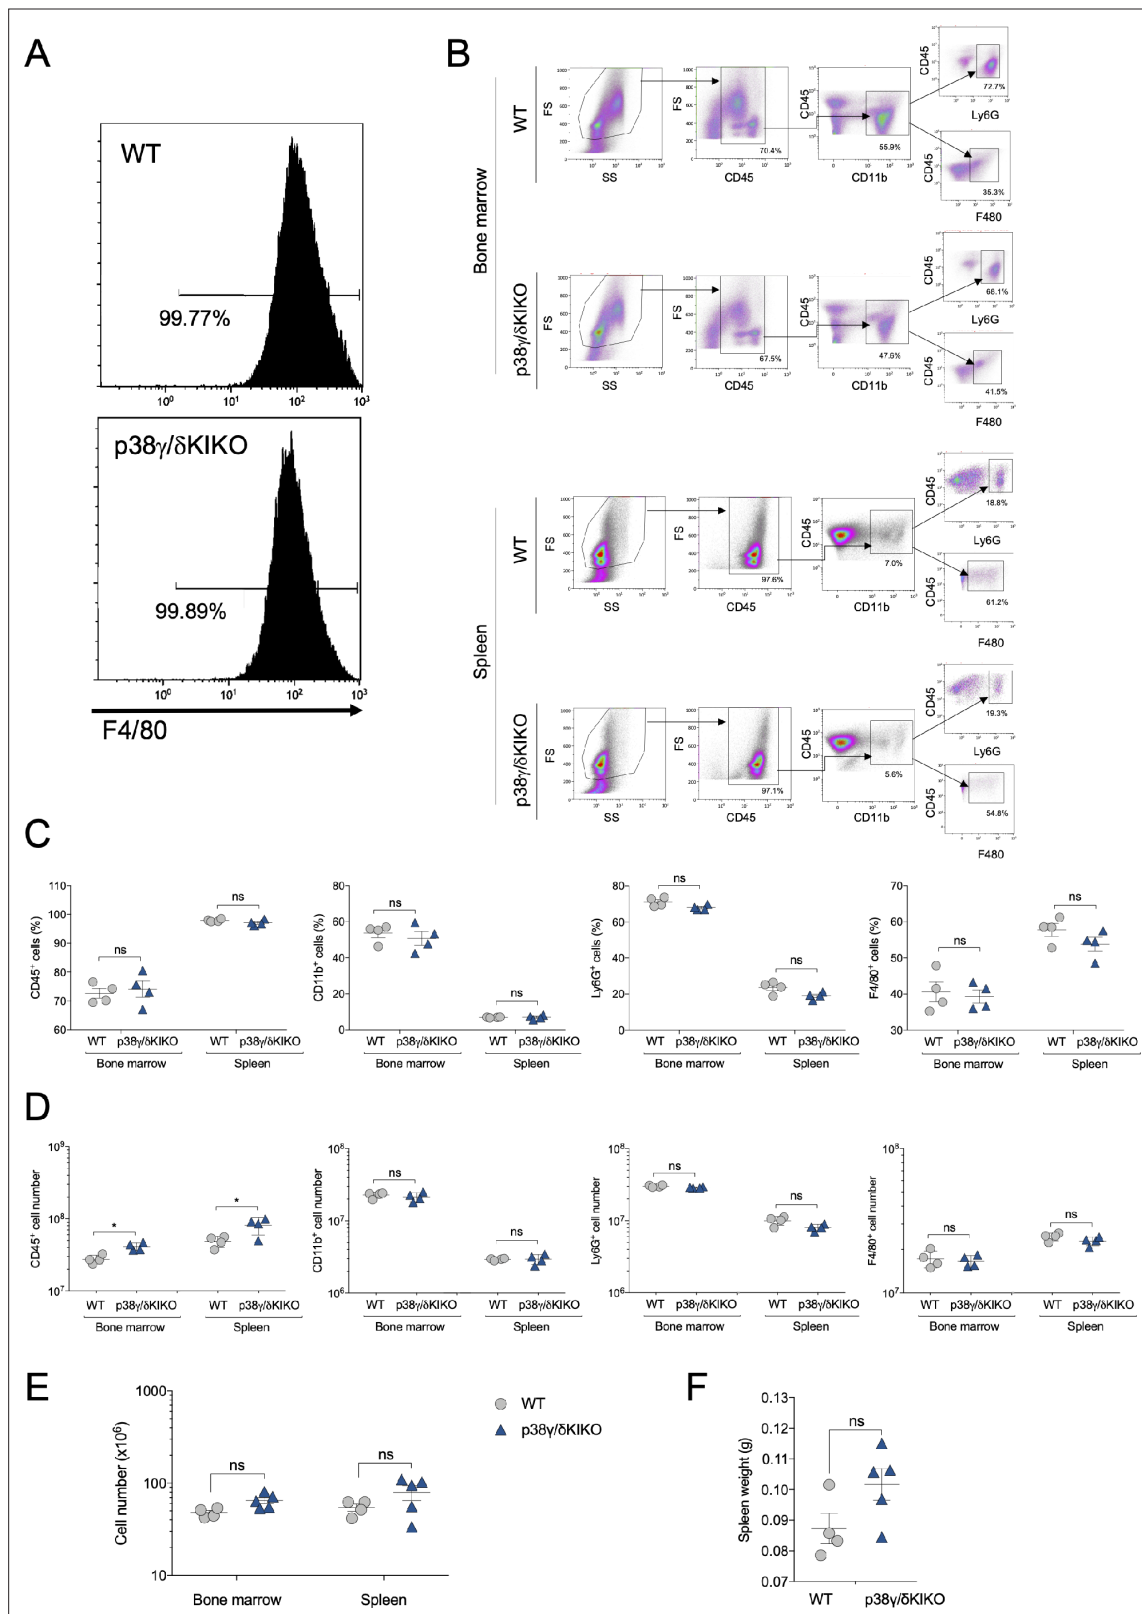

**Figure 2—figure supplement 1.** Characterization of immune cell populations of the p38 $\gamma$ /δKIKO mouse in basal conditions. **(A)** In vitro bone marrow-derived macrophage (BMDM) development is not affected in p38 $\gamma$ /δKIKO mice. BMDM from wild-type (WT) and p38 $\gamma$ /δKIKO mice was stained with anti-F4/80 antibody, and analysed by flow cytometry. Results are representative plots ( $n = 3$ ). **(B)** Bone marrow (BM) or spleen cell suspensions were stained with the indicated antibodies and analysed by flow cytometry. Representative flow cytometry profiles and analysis are shown. **(C)** Frequency

Figure 2—figure supplement 1 continued on next page

*Figure 2—figure supplement 1 continued*

and **(D)** total cell number of leucocytes (CD45<sup>+</sup>), myeloid cells (CD11b<sup>+</sup>), neutrophils (Ly6G<sup>+</sup>), and macrophages (F4/80<sup>+</sup>) in adult mouse BM or spleen. Percentage of myeloid cell population was determined relative to CD45<sup>+</sup> cell and percentages of neutrophils and macrophages were determined relative to CD45<sup>+</sup> CD11b<sup>+</sup> cell. **(E)** Total cell number in BM or spleen of the indicated genotypes. **(F)** Weight of the spleen of the indicated genotypes. Each dot in C-F represents a single mouse ( $n = 4-5$ ). ns, not significant;  $*p \leq 0.05$ .

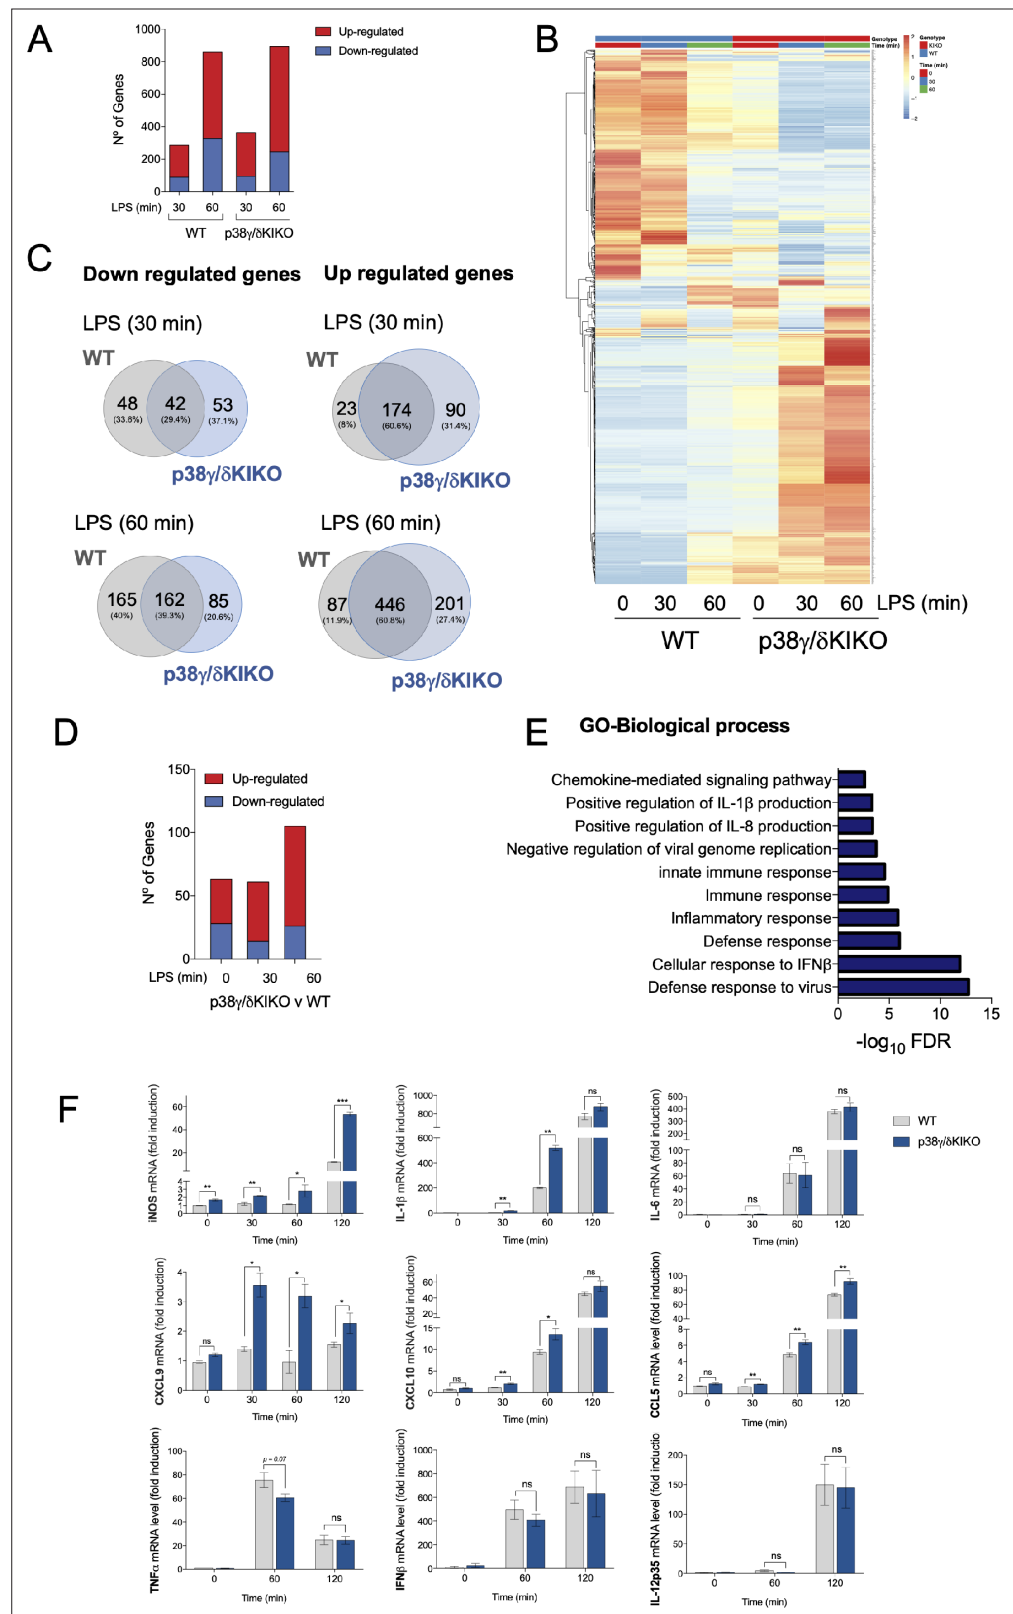

**Figure 3.** RNA-sequencing analysis in lipopolysaccharide (LPS)-stimulated wild-type (WT) and p38 $\gamma$ /δKIKO macrophages. (A) Bone marrow-derived macrophage (BMDM) from WT and p38 $\gamma$ /δKIKO mice was exposed to LPS (100 ng/ml) for 0, 30, and 60 min and gene expression analysed by RNA-sequencing. Bar plot showing the number of differentially expressed genes up- or down-regulated after LPS stimulation ( $-2 > \log_2 \text{FC} > 2$ , p-value  $< 0.05$ ).

Figure 3 continued on next page

*Figure 3 continued*

Three samples per condition were used. **(B)** Hierarchical heatmap of the differentially expressed genes in panel **(A)**. **(C)** Venn diagrams showing the overlaps of genes up- or down-regulated over the time course of LPS stimulation in p38 $\gamma$ / $\delta$ KIKO and WT macrophages. **(D)** Bar plot showing the number of differentially expressed genes up- or down-regulated ( $-1.5 > \log FC > 1.5$ , p-value  $< 0.05$ ) in p38 $\gamma$ / $\delta$ KIKO macrophages compared with WT after LPS stimulation at the indicated times (minutes). Three samples per condition were used. **(E)** Enrichment analysis of Gene Ontology (GO) biological processes of the differentially expressed genes in LPS-activated p38 $\gamma$ / $\delta$ KIKO macrophages after LPS stimulation, excluding genes that are common with LPS-treated WT macrophages. **(F)** BMDM from WT and p38 $\gamma$ / $\delta$ KIKO mice was exposed to LPS (100 ng/ml) for the indicated times. mRNA expression of indicated genes at different times, relative to WT expression at 0 hr, was determined by quantitative PCR (qPCR) and normalized to *Actb* mRNA. Data show mean  $\pm$  standard error of the mean (SEM) ( $n = 3-6$ ). ns, not significant; \* $p \leq 0.05$ ; \*\* $p \leq 0.01$ , \*\*\* $p \leq 0.001$ , relative to WT mice in the same conditions.

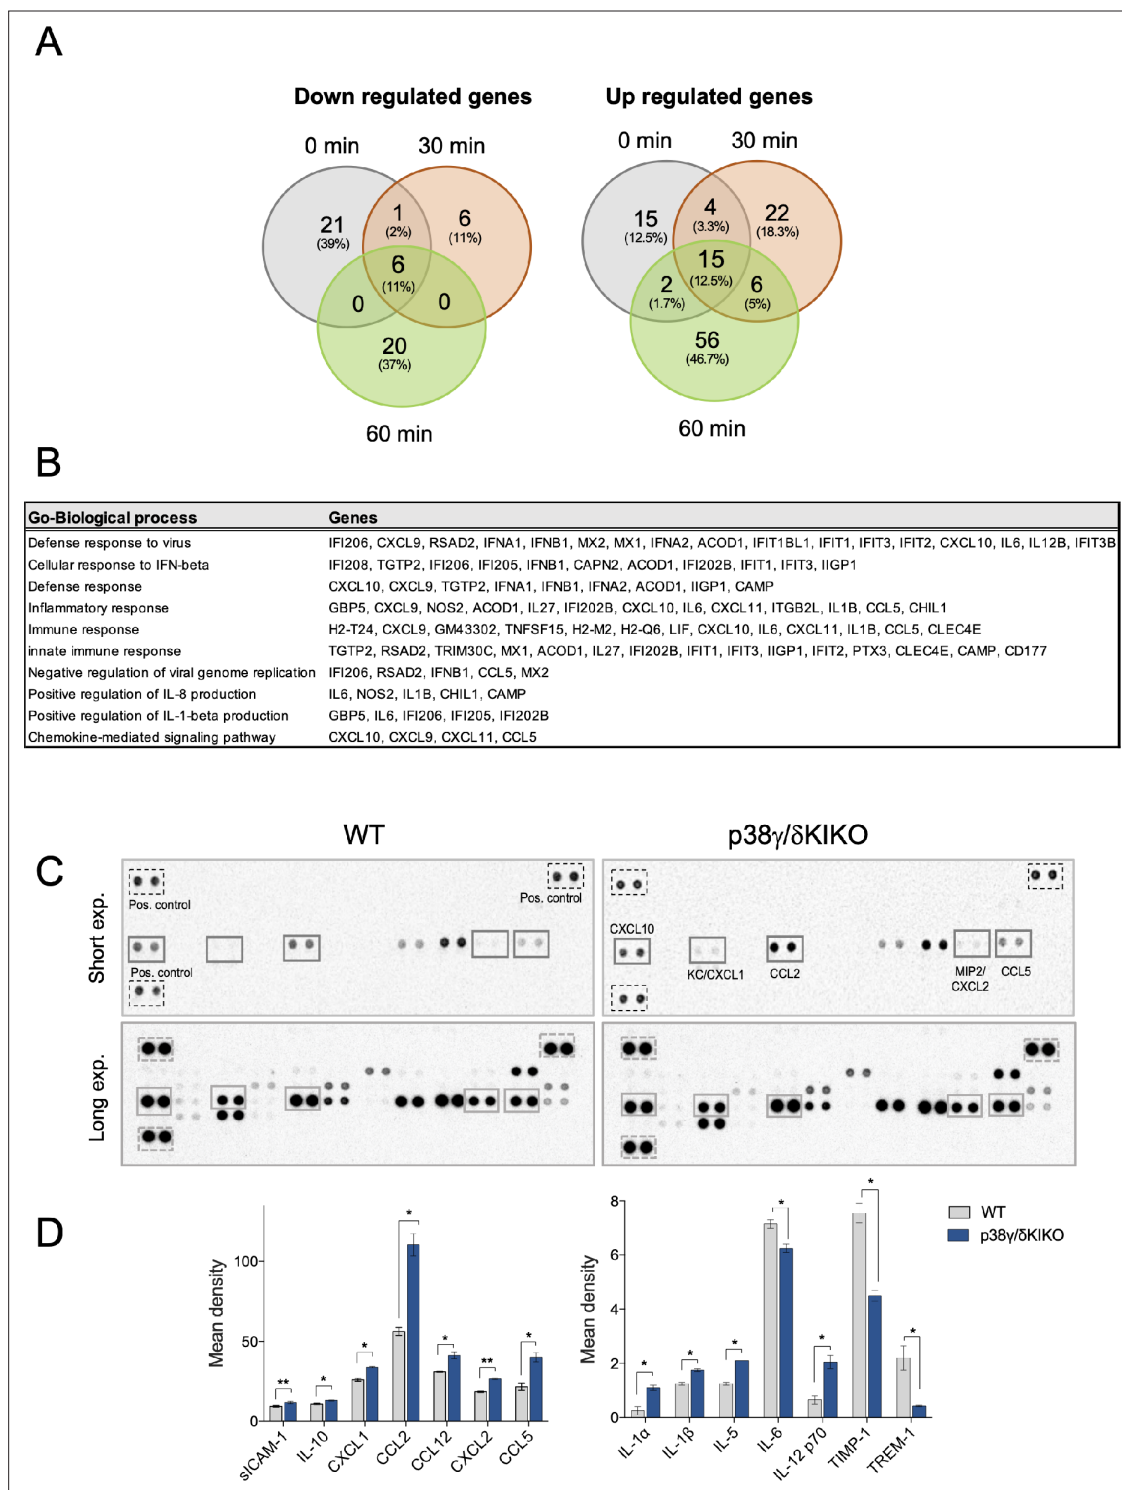

**Figure 3—figure supplement 1.** RNA-sequencing analysis and cytokine production in lipopolysaccharide (LPS)-stimulated wild-type (WT) and p38 $\gamma$ / $\delta$ KIKO macrophages. **(A)** Table showing Gene Ontology (GO) biological processes genes. Negatively regulated genes are highlighted in bold. **(B)** Bone marrow-derived macrophage (BMDM) from WT and p38 $\gamma$ / $\delta$ KIKO mice was exposed to LPS (100 ng/ml) for 6 hr. Cell culture media (450  $\mu$ l) from WT and p38 $\gamma$ / $\delta$ KIKO macrophages were incubated with the Proteome profiler mouse cytokine array membrane according to the manufacturer's instructions. Proteins were visualized using chemiluminescent detection reagent for 30 s and then performing short exposure (~0.5 min) and long exposure (~5min). **(C)** Representative membranes are shown. **(D)** Corresponding quantification by determining pixel densities on the film using ImageJ software. ns, not significant; \* $p \leq 0.05$ ; \*\* $p \leq 0.01$ .

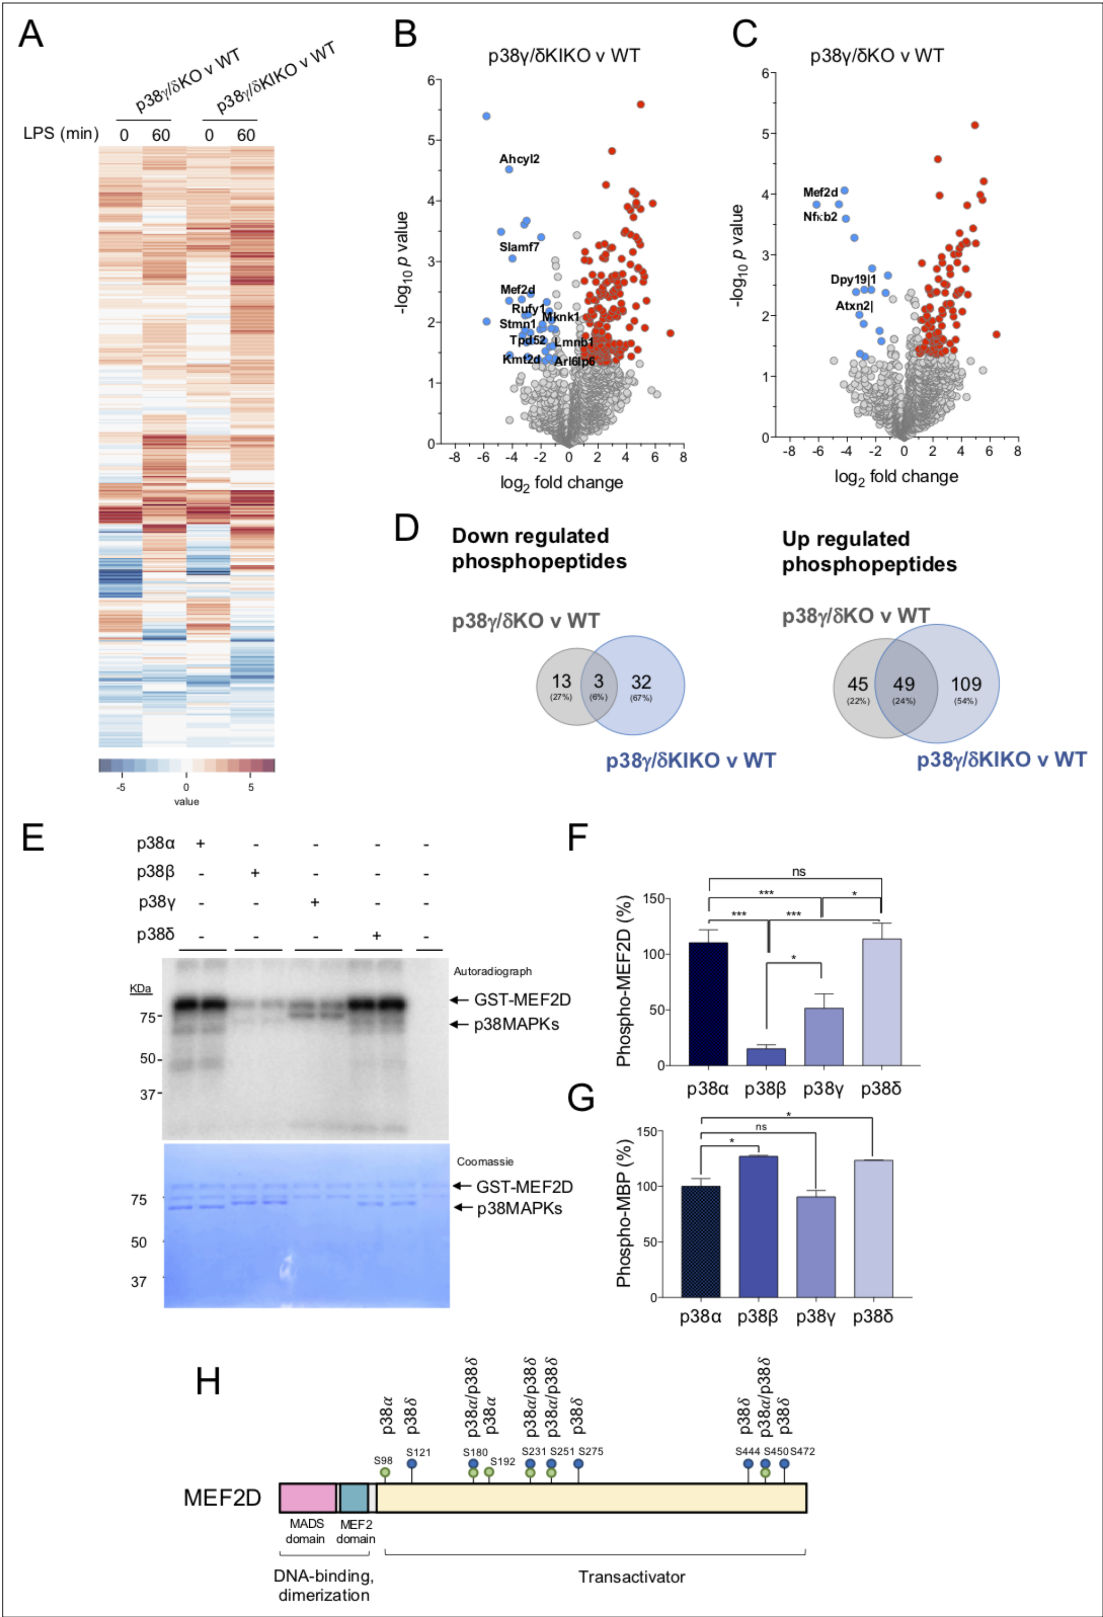

**Figure 4.** Identification of proteins phosphorylated by p38 $\gamma$ /p38 $\delta$ . **(A)** Peritoneal macrophages from wild-type (WT), p38 $\gamma$ / $\delta$ KO, and p38 $\gamma$ / $\delta$ KIKO mice were exposed to lipopolysaccharide (LPS) (100 ng/ml) for 0 or 60 min and phosphorylated peptides identified. Heatmap showing differentially phosphorylated phosphosites up- or down-regulated after LPS stimulation. Volcano plots showing the differential phosphoproteome and statistical significance between **(B)** p38 $\gamma$ / $\delta$ KIKO and WT ( $n = 3$ ), and **(C)** p38 $\gamma$ / $\delta$ KO and WT ( $n = 3$ ) macrophages treated with LPS for 60 min. Examples of

Figure 4 continued on next page

*Figure 4 continued*

significantly enriched up-regulated (red) and down-regulated (blue) phosphosites are shown ( $-1.0 > \log FC > 1.0$ ,  $p\text{-value} < 0.05$ ). **(D)** Venn diagrams showing the overlaps of differentially phosphorylated proteins (up- or down-regulated) at 60-min LPS stimulation in p38 $\gamma$ / $\delta$ KIKO and p38 $\gamma$ / $\delta$ KO macrophages compared to WT. **(E)** Recombinant GST-MEF2D was incubated with active recombinant p38 $\alpha$ , p38 $\beta$ , p38 $\gamma$ , or p38 $\delta$  for 60 min in a phosphorylation reaction mix containing Mg-[ $\gamma$ - $^{32}$ P]ATP, as described in Materials and methods. The activity of recombinant p38 $\alpha$ , p38 $\beta$ , p38 $\gamma$ , or p38 $\delta$  was matched using myelin basic protein (MBP) as substrate and 0.5 U/ml were used in the assay. Reaction was stopped with sodium dodecyl sulfate (SDS)-sample buffer. Samples were resolved in SDS-polyacrylamide gel electrophoresis (PAGE), subjected to Coomassie blue staining and autoradiography. **(F)** Bands corresponding to  $^{32}$ P-MEF2D from panel **(E)** were quantified. Data show mean  $\pm$  standard error of the mean (SEM) from two experiments in duplicate. ns, not significant \* $p \leq 0.05$ ; \*\*\* $p \leq 0.001$ , relative to MEF2D phosphorylation by p38 $\alpha$ . **(G)** Recombinant MBP was incubated with active (0.5 U/ml) recombinant p38 $\alpha$ , p38 $\beta$ , p38 $\gamma$ , or p38 $\delta$  for 60 min in a phosphorylation reaction mix containing Mg-[ $\gamma$ - $^{32}$ P]ATP, as described in Materials and methods. **(H)** Schematic representation of the sites in MEF2D phosphorylated by p38 $\alpha$  and/or p38 $\delta$ , all of them located in the transactivation domain.

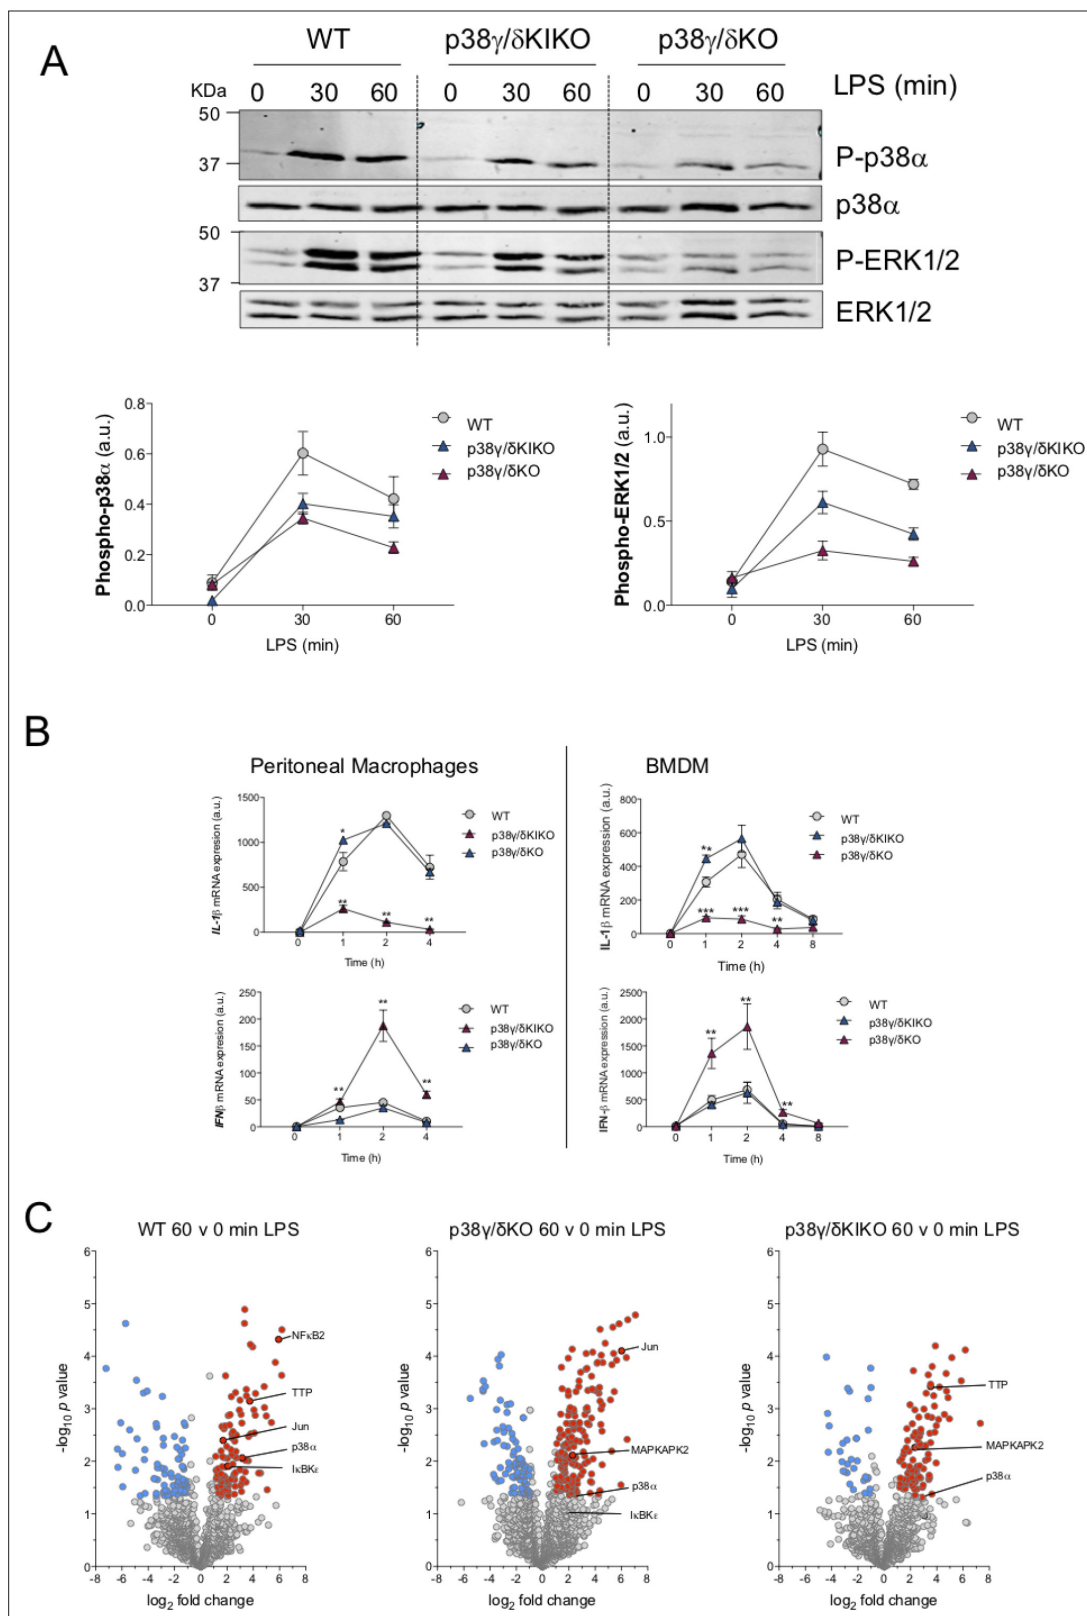

**Figure 4—figure supplement 1.** Identification of proteins phosphorylated by p38γ/p38δ. (A) Peritoneal macrophages from wild-type (WT), p38γ/δKO, and p38γ/δKIKO mice were exposed to lipopolysaccharide (LPS) (100 ng/ml) for the indicated times. Cell lysates (30 μg) were immunoblotted with the indicated antibodies to active phosphorylated p38α (P-p38α) and ERK1/2 (P-ERK1/2). Total protein levels of p38α and ERK1/2 were also measured in the same lysates. Representative blots of two independent experiments with similar results are shown. (Lower panel) Intensity of the bands corresponding to

Figure 4—figure supplement 1 continued on next page

*Figure 4—figure supplement 1 continued*

Phospho-p38 $\alpha$  and Phospho-ERK1/2 (upper panel A) were quantified. Data are presented as arbitrary units (a.u.). **(B)** Peritoneal macrophages and bone marrow-derived macrophage (BMDM) from WT, p38 $\gamma$ / $\delta$ KO, and p38 $\gamma$ / $\delta$ KIKO mice were exposed to LPS (100 ng/ml) for the indicated times. Relative mRNA expression of indicated genes at different times was determined by quantitative PCR (qPCR) and normalized to *Actb* mRNA. Data show mean  $\pm$  standard error of the mean (SEM) ( $n = 3-6$ ). \* $p \leq 0.05$ ; \*\* $p \leq 0.01$ , \*\*\* $p \leq 0.001$ , relative to WT mice in the same conditions. **(C)** Phosphorylated peptides from LPS-stimulated macrophages were identified. Volcano plots show the phosphoproteome statistical significance in LPS-treated macrophages between times 0 and 60.  $n = 3$  per condition.

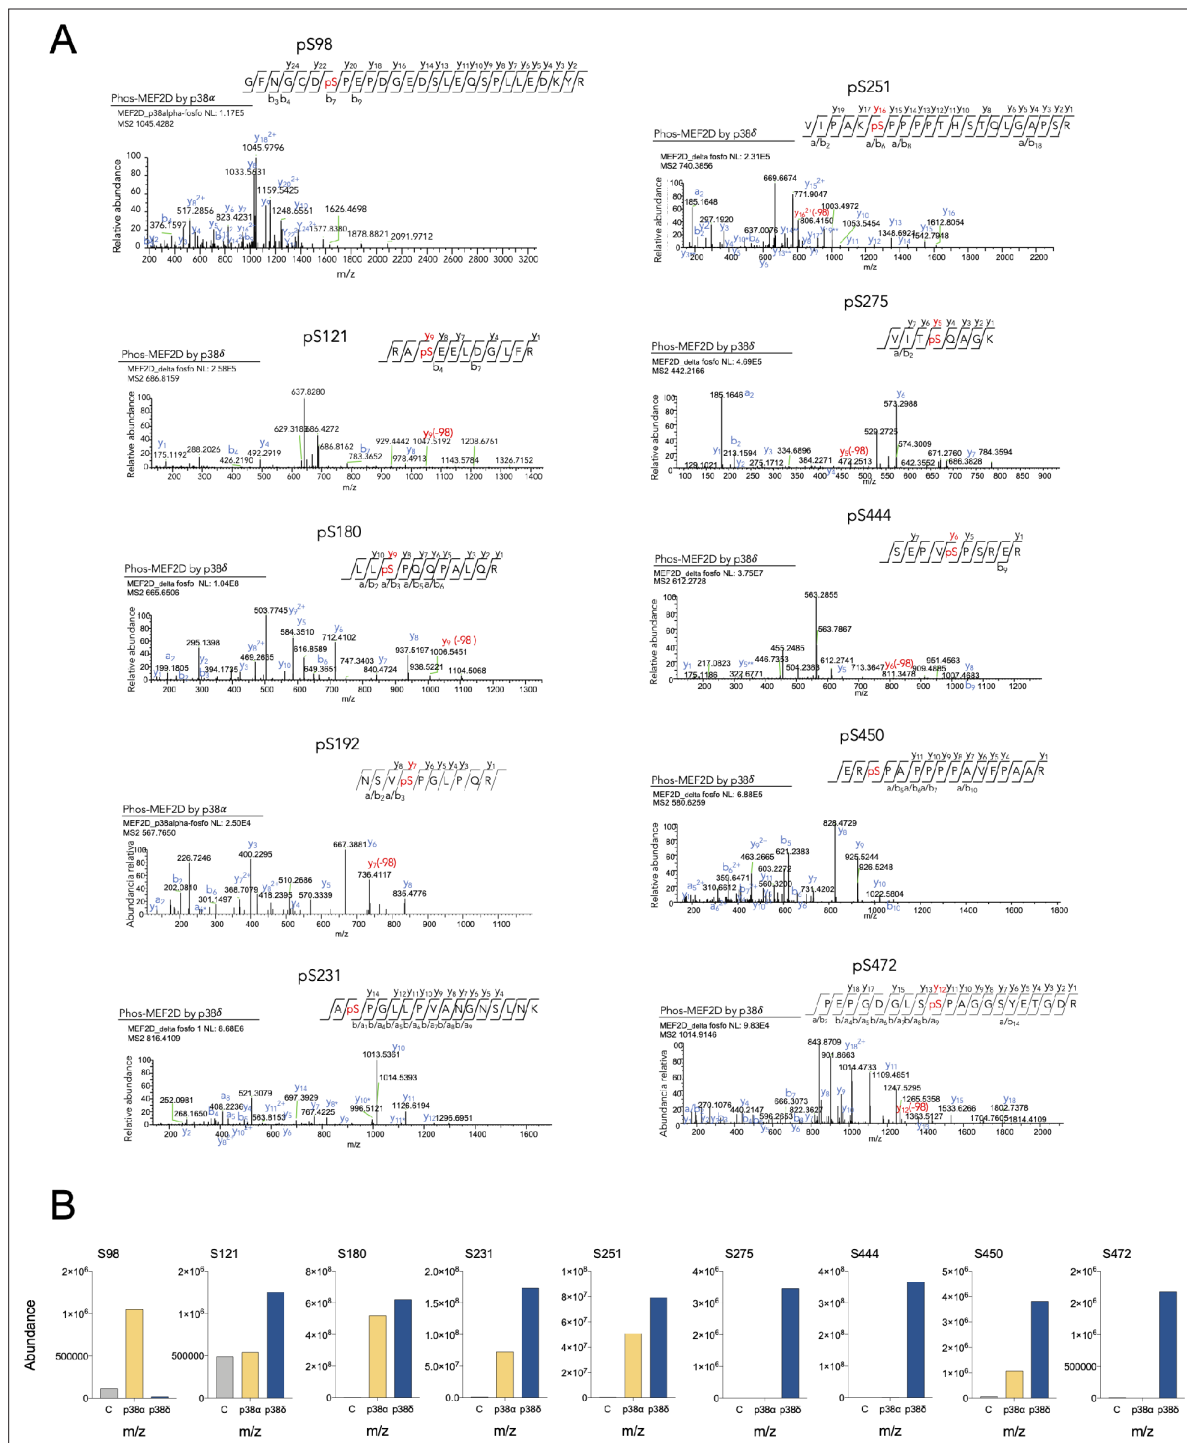

**Figure 4—figure supplement 2.** Identification of myocyte enhancer factor-2D (MEF2D) residues phosphorylated in vitro by p38 $\alpha$  and p38 $\delta$ . **(A)** Liquid chromatography–mass spectrometry (LC–MS)/MS analysis of the  $m/z$  ion of the phosphorylated MEF2D peptide (amino acids and phosphopeptide sequences are indicated, where pS (red) indicates phosphorylated serine). **(B)** The intensity of the MEF2D-derived phosphopeptides was expressed as abundance of the corresponding  $m/z$ .

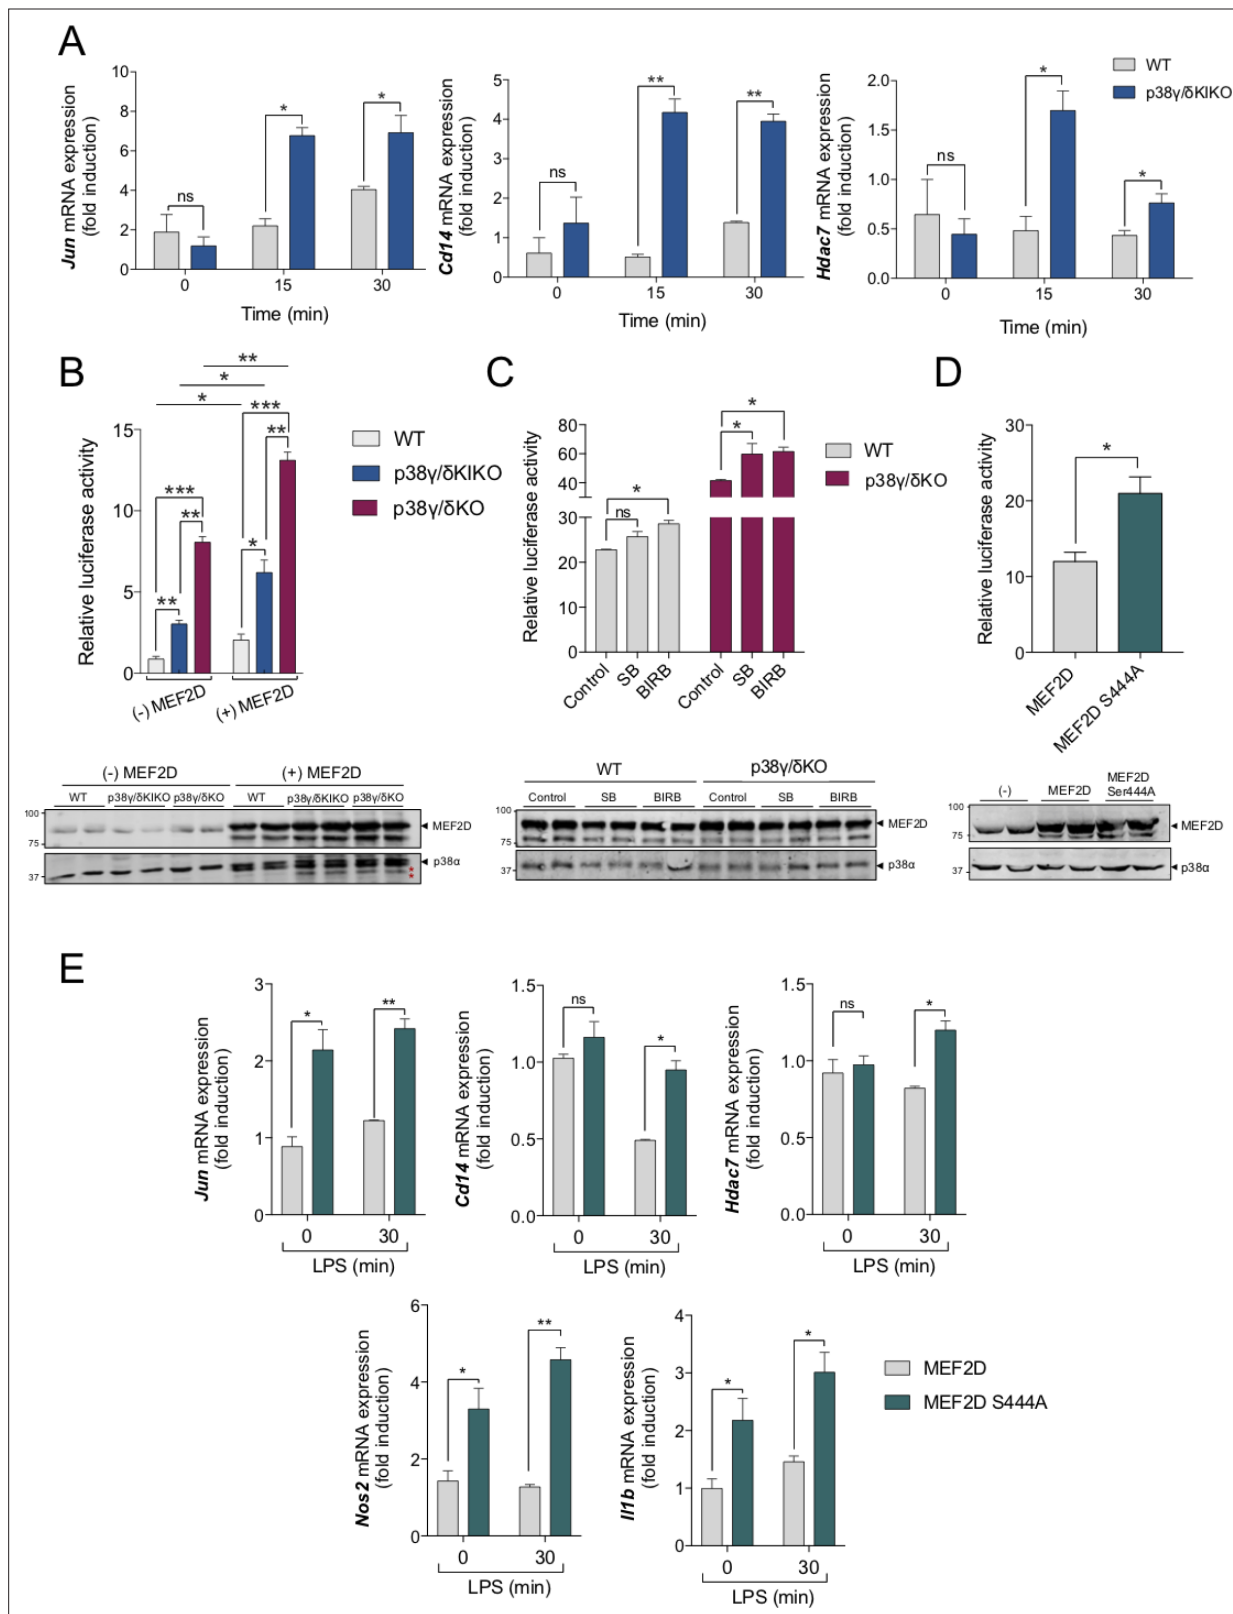

**Figure 5.** Regulation of myocyte enhancer factor-2D (MEF2D) transcriptional activity by p38γ and p38δ and S444 phosphorylation. **(A)** Bone marrow-derived macrophage (BMDM) from wild-type (WT) and p38γ/δKIKO mice was exposed to lipopolysaccharide (LPS) (100 ng/ml) for the indicated times. Relative mRNA expression of *Jun*, *Cd14*, and *Hdac7* genes at different times was determined by quantitative PCR (qPCR). Results were normalized to *Actb* RNA expression and fold induction was calculated relative to WT expression at 0 min. Figure shows mean ± standard error of the mean (SEM)

Figure 5 continued on next page

## Figure 5 continued

from two experiments in triplicate. ns, not significant; \* $p \leq 0.05$  and \*\* $p \leq 0.01$ , relative to WT mice in the same conditions. **(B)** WT, p38 $\gamma$ / $\delta$ KO, and p38 $\gamma$ / $\delta$ KO fibroblasts were co-transfected either with plasmids coding for Flag-MEF2D, Renilla, and luciferase firefly gene under the control of MEF2 response elements ((+) MEF2D), or with plasmids encoding for Renilla and luciferase firefly ((-) MEF2D). (Upper panel) Luciferase activity values were normalized against Renilla. Figure shows mean  $\pm$  SEM from one representative experiment in triplicate. This experiment was repeated twice more with similar result. ns, not significant; \* $p \leq 0.05$ ; \*\* $p \leq 0.01$ ; \*\*\* $p \leq 0.001$ . (Lower panel) Cell lysates (10  $\mu$ g) were immunoblotted with the indicated antibodies to total protein levels of MEF2D and p38 $\alpha$ . Representative blots of two independent experiments with similar results are shown. Molecular weights are indicated. (\*) unspecific band **(C)** WT and p38 $\gamma$ / $\delta$ KO fibroblasts were transfected as in **(B)**. Cells were incubated with the indicated p38MAPK inhibitor (or Dimethyl sulfoxide [DMSO] as control) for 6 hr before lysis. SB203580 (SB) at 10  $\mu$ M and BIRB796 (BIRB) at 10  $\mu$ M. (Upper panel) Luciferase activity was calculated as in **(B)**. (Lower panel) Cell lysates (10  $\mu$ g) were immunoblotted as in panel B. **(D)** WT fibroblasts were transfected with plasmid Flag-MEF2D or Flag-MEF2D<sup>S444A</sup>, plus plasmids coding Renilla and luciferase firefly gene under the control of MEF2 response elements. (Lower panel) Luciferase activity values were normalized against Renilla. Figure shows mean  $\pm$  SEM from one representative experiment in triplicate. This experiment was repeated twice more with similar result. \* $p \leq 0.05$ . (Lower panel) Cell lysates (50  $\mu$ g) were immunoblotted as in panel B. **(E)** WT fibroblasts were transfected with Flag-MEF2D or Flag-MEF2D<sup>S444A</sup>, and stimulated with LPS for 30 min. Relative mRNA expression of the indicated genes was determined by qPCR. Results were normalized to *Actb* RNA expression and fold induction was calculated relative to that in cells expressing Flag-MEF2D WT at time 0 of LPS. Figure shows mean  $\pm$  SEM from two experiments in triplicate. \* $p \leq 0.05$ .
