# Supplementary material for: p38γ and p38δ modulate innate immune response by regulating MEF2D activation
Source: eLife journal article supplement (doi:10.7554/elife.86200), 2023-07-17
Supplement: supp [file elife_poa_e86200_Figure_3_figure_supplement_1.pdf › elife_poa_e86200_Figure_3_figure_supplement_1.pdf]

A

| Go-Biological process                           | Genes                                                                                                                 |
|-------------------------------------------------|-----------------------------------------------------------------------------------------------------------------------|
| Defense response to virus                       | IFI206, CXCL9, RSAD2, IFNA1, IFNB1, MX2, MX1, IFNA2, ACOD1, IFIT1BL1, IFIT1, IFIT3, IFIT2, CXCL10, IL6, IL12B, IFIT3B |
| Cellular response to IFN-beta                   | <b>IFI208</b> , TGTP2, IFI206, IFI205, IFNB1, CAPN2, ACOD1, IFI202B, IFIT1, IFIT3, IIGP1                              |
| Defense response                                | CXCL10, CXCL9, TGTP2, IFNA1, IFNB1, IFNA2, ACOD1, IIGP1, CAMP                                                         |
| Inflammatory response                           | GBP5, CXCL9, NOS2, ACOD1, IL27, IFI202B, CXCL10, IL6, CXCL11, <b>ITGB2L</b> , IL1B, CCL5, <b>CHIL1</b>                |
| Immune response                                 | H2-T24, CXCL9, GM43302, TNFSF15, H2-M2, H2-Q6, LIF, CXCL10, IL6, CXCL11, IL1B, CCL5, CLEC4E                           |
| innate immune response                          | TGTP2, RSAD2, TRIM30C, MX1, ACOD1, IL27, IFI202B, IFIT1, IFIT3, IIGP1, IFIT2, PTX3, CLEC4E, CAMP, <b>CD177</b>        |
| Negative regulation of viral genome replication | IFI206, RSAD2, IFNB1, CCL5, MX2                                                                                       |
| Positive regulation of IL-8 production          | IL6, NOS2, IL1B, <b>CHIL1</b> , CAMP                                                                                  |
| Positive regulation of IL-1-beta production     | GBP5, IL6, IFI206, IFI205, IFI202B                                                                                    |
| Chemokine-mediated signaling pathway            | CXCL10, CXCL9, CXCL11, CCL5                                                                                           |

B

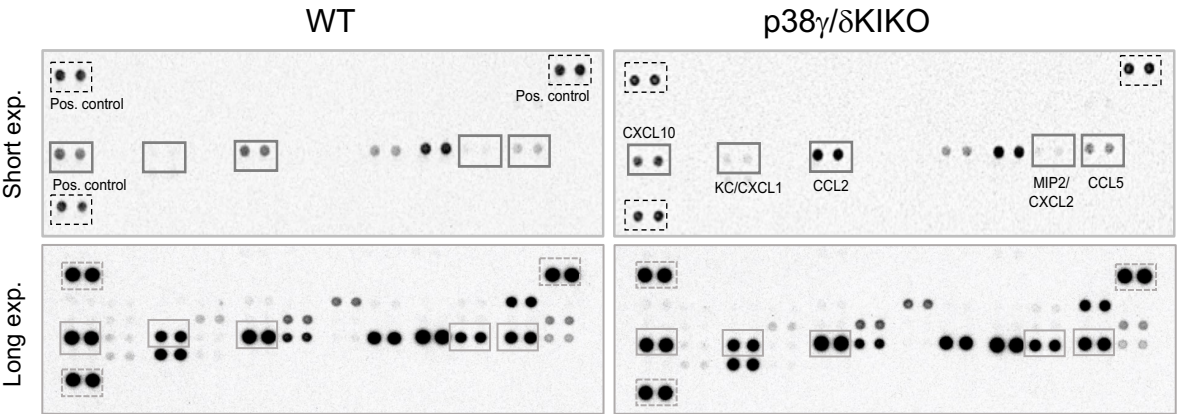

C

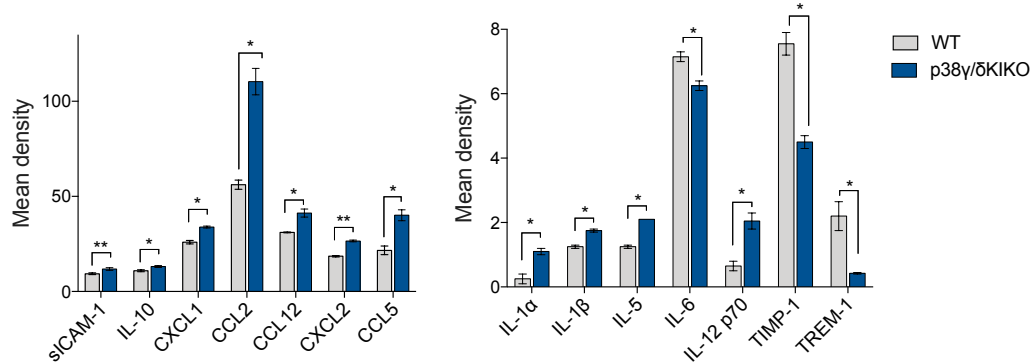

Fig. S3
