# Supplementary material for: p38γ and p38δ modulate innate immune response by regulating MEF2D activation
Source: eLife journal article supplement (doi:10.7554/elife.86200), 2023-07-17
Supplement: supp [file elife_poa_e86200_Figure_4_figure_supplement_2.pdf › elife_poa_e86200_Figure_4_figure_supplement_2.pdf]

| p38 $\gamma$ /δKO v WT comparison          |         |          |                                          |
|--------------------------------------------|---------|----------|------------------------------------------|
| Protein                                    | Gene    | Position | Sequence                                 |
| Nuclear factor NF-kappa-B p100/p52 subunit | Nfkb2   | 425      | SRRDTDAGEGAEERPT <b>P</b> PEAPQGEPQALDTL |
| Myocyte-specific enhancer factor 2D        | Mef2d   | 437      | TVTTHPHISIKSEP <b>VSP</b> SRERSPAPPPAVF  |
| Probable C-mannosyltransferase DPY19L1     | Dpy19l1 | 46       | SEVDAGELGSERTPP <b>SP</b> GRRGAAGRKGPRAG |
| Ataxin-2-like protein                      | Atxn2l  | 407      | PGSEARGINGGPSRM <b>SP</b> KAQRPLRGAKTLSS |

| p38 $\gamma$ /δKIKO v WT comparison                          |          |          |                                           |
|--------------------------------------------------------------|----------|----------|-------------------------------------------|
| Protein                                                      | Gene     | Position | Sequence                                  |
| Putative adenosylhomocysteinase 3                            | Ahcy2    | 109      | HHQHQRHRDGGGEAL <b>VSP</b> DGTVTEAPRTVKKQ |
| Myocyte-specific enhancer factor 2D                          | Mef2d    | 437      | TVTTHPHISIKSEP <b>VSP</b> SRERSPAPPPAVF   |
| SLAM family member 7                                         | Slamf7   | 313      | PNTFYSTVQIPKV <b>KS</b> PSSLPAPPLVPRSL    |
| RUN and FYVE domain-containing protein 1                     | Rufy1    | 52       | ESGEAFEIVDRSQL <b>PS</b> GELRSASRPVADS    |
| Stathmin                                                     | Stmn1    | 25       | ELEKRASGQAFELI <b>LSP</b> RSKESVPDFPLSP   |
| Tumor protein D52                                            | Tpd52    | 170      | SVGSVITKKLEDVKN <b>SP</b> TFKSFEKVENLKS   |
| Uncharacterized protein KIAA1522                             | Kiaa1522 | 909      | IFSKGTKKLQLERP <b>VSP</b> EAQADLQRNLVAEL  |
| Histone-lysine N-methyltransferase 2D                        | Kmt2d    | 2299     | FKAPLTPRASQVEP <b>QSP</b> GLGLRAQEPPPAQA  |
| ADP-ribosylation factor-like protein 6-interacting protein 6 | Arl6ip6  | 80       | SETKRAPLLPRVGD <b>GS</b> PVLPDKRNGIFPATA  |
| Lamin-B1                                                     | Lmnb1    | 21       | PVQQQRAGSRASAPAT <b>PL</b> SPTRLRLQEKEE   |
| MAP kinase-interacting serine/threonine-protein kinase 1     | Mknk1    | 344      | QHPWVQGQAPERGL <b>PTP</b> QVLQRNSSTMDLTL  |
