# Supplementary material for: p38γ and p38δ modulate innate immune response by regulating MEF2D activation
Source: eLife journal article supplement (doi:10.7554/elife.86200), 2023-07-17
Supplement: supp [file Escos et al Table S1.xlsx]

## Sheet: WT0 v KIKO0
Gene expression in LPS-stimulated p38γ/δKIKO and WT BMDM. List of selected genes with either increased or decreased expression between genotypes
by at least 1.5-fold (-1.5< logFC <1.5), with a p-value <0.05
WT time 0 versus KIKO time 0 LPS
Row.names	baseMean	log2FoldChange	lfcSE	stat	pvalue	padj	Input.Type	MGI.Gene.Marker.ID	Symbol
ENSMUST00000182880	22.4086	-8.12366	1.03569	-7.84373	4.37344e-15	4.15207e-12	Ensembl Transcript	2442822	Ifi208
ENSMUST00000024839	91.5483	-2.69769	0.17904	-15.0676	2.64749e-51	3.24731e-47	Ensembl Transcript	104754	Sik1
ENSMUST00000082395	16.2954	-2.05641	0.39013	-5.27107	1.35628e-07	2.17392e-05	Ensembl Transcript	102480	mt-Tm
ENSMUST00000214259	21.9523	-2.02739	0.305039	-6.64633	3.00484e-11	1.85429e-08	Ensembl Transcript	2177494	Olfr111
ENSMUST00000115371	71.7559	-1.97648	0.147517	-13.3983	6.18234e-41	1.90756e-37	Ensembl Transcript	97960	Rnps1
ENSMUST00000082423	49.7854	-1.94798	0.355363	-5.48166	4.21353e-08	9.12667e-06	Ensembl Transcript	102478	mt-Tp
ENSMUST00000083103	14.0033	-1.79445	0.458942	-3.90997	9.23069e-05	0.00248203	Ensembl Transcript	103186	Rn7sk
ENSMUST00000115096	13.2739	-1.77377	0.397174	-4.46598	7.97047e-06	0.00045968	Ensembl Transcript	2179061	Plxna4
ENSMUST00000185789	20.5863	-1.61243	0.443872	-3.63264	0.000280536	0.00544399	Ensembl Transcript	1926855	Kcnq1ot1
ENSMUST00000082416	45.0623	-1.59025	0.361486	-4.39919	1.08654e-05	0.000547349	Ensembl Transcript	102474	mt-Ts2
ENSMUST00000174784	285.434	-1.50998	0.36591	-4.12666	3.68069e-05	0.00127247	Ensembl Transcript	5141882	Gm20417
ENSMUST00000035938	877.669	1.54843	0.318188	4.86641	1.13643e-06	0.000101636	Ensembl Transcript	98262	Ccl5
ENSMUST00000085102	163.527	1.58082	0.431888	3.66026	0.000251961	0.00503188	Ensembl Transcript	103159	Cish
ENSMUST00000169733	167.571	1.58462	0.156762	10.1084	5.07049e-24	6.95334e-21	Ensembl Transcript	1920754	1700071M16Rik
ENSMUST00000016427	130.735	1.62425	0.407535	3.98555	6.73251e-05	0.00196437	Ensembl Transcript	95914	H2-M2
ENSMUST00000173128	15.4682	1.74775	0.338392	5.16486	2.40623e-07	3.29974e-05	Ensembl Transcript	5011869	Gm19684
ENSMUST00000167624	365.23	1.80933	0.122517	14.768	2.35564e-49	9.69112e-46	Ensembl Transcript	95742	Glo1
ENSMUST00000120770	400.263	1.81271	0.12067	15.0221	5.26221e-51	3.24731e-47	Ensembl Transcript	3649615	Gm13443
ENSMUST00000168254	82.4584	1.93835	0.555393	3.49005	0.000482931	0.00784736	Ensembl Transcript	3650685	Ifit1bl1
ENSMUST00000022722	8390.3	2.0371	0.502736	4.05203	5.07749e-05	0.00160272	Ensembl Transcript	103206	Acod1
ENSMUST00000173900	27.6363	2.0607	0.224877	9.16368	5.0158e-20	5.62773e-17	Ensembl Transcript	1925060	A930015D03Rik
ENSMUST00000153546	221.024	2.11353	0.592186	3.56903	0.000358312	0.00639984	Ensembl Transcript	1927656	Ms4a4c
ENSMUST00000172538	103.508	2.18157	0.186489	11.6981	1.30355e-31	3.21767e-28	Ensembl Transcript	2442805	H2-T-ps
ENSMUST00000028881	13113.3	2.28247	0.457991	4.98365	6.23954e-07	6.69638e-05	Ensembl Transcript	96543	Il1b
ENSMUST00000216328	12.4262	2.42389	0.45271	5.35418	8.59459e-08	1.56336e-05	Ensembl Transcript	2177482	Olfr99
ENSMUST00000113760	1321.49	2.54299	0.276038	9.21246	3.18737e-20	3.93385e-17	Ensembl Transcript	95958	H2-T24
ENSMUST00000024757	55.2735	2.6804	0.356798	7.51238	5.80623e-14	4.77736e-11	Ensembl Transcript	2682634	Enpp4
ENSMUST00000006956	31.7502	2.8385	0.517662	5.4833	4.17455e-08	9.12667e-06	Ensembl Transcript	98223	Saa3
ENSMUST00000163196	39.9603	3.5362	0.945711	3.7392	0.00018461	0.0040542	Ensembl Transcript	4937868	Gm17041

## Sheet: WT30 v KIKO30
WT time 30 versus KIKO time 30 min LPS
Row.names	baseMean	log2FoldChange	lfcSE	stat	pvalue	padj	Input.Type	MGI.Gene.Marker.ID	Symbol
ENSMUST00000182880	22.4086	-6.78477	0.982496	-6.90564	4.99763e-12	3.52017e-09	Ensembl Transcript	2442822	Ifi208
ENSMUST00000068258	11.3561	-4.40796	0.844457	-5.21988	1.79043e-07	3.23802e-05	Ensembl Transcript	1918833	9130008F23Rik
ENSMUST00000214259	21.9523	-2.13817	0.354087	-6.03853	1.5552e-09	4.95553e-07	Ensembl Transcript	2177494	Olfr111
ENSMUST00000024839	91.5483	-2.11702	0.195571	-10.8248	2.6259e-27	7.02848e-24	Ensembl Transcript	104754	Sik1
ENSMUST00000115371	71.7559	-1.91625	0.155084	-12.3562	4.51177e-35	2.0127e-31	Ensembl Transcript	97960	Rnps1
ENSMUST00000108436	8.52701	-1.65266	0.465707	-3.54871	0.000387118	0.0187032	Ensembl Transcript	107610	Zfp94
ENSMUST00000201176	2392.06	1.50037	0.430866	3.48223	0.00049726	0.0227905	Ensembl Transcript	1352450	Cxcl10
ENSMUST00000154245	122.482	1.50329	0.467617	3.21479	0.0013054	0.0482601	Ensembl Transcript	1202729	Art3
ENSMUST00000169733	167.571	1.54844	0.174835	8.85654	8.25363e-19	1.22732e-15	Ensembl Transcript	1920754	1700071M16Rik
ENSMUST00000198803	478.135	1.56368	0.404382	3.86685	0.000110252	0.00699289	Ensembl Transcript	2429943	Gbp5
ENSMUST00000210960	129.976	1.60796	0.302749	5.3112	1.08908e-07	2.11234e-05	Ensembl Transcript	97610	Plat
ENSMUST00000035938	877.669	1.69956	0.338344	5.02316	5.08283e-07	8.03011e-05	Ensembl Transcript	98262	Ccl5
ENSMUST00000120770	400.263	1.7701	0.130408	13.5736	5.741e-42	3.84159e-38	Ensembl Transcript	3649615	Gm13443
ENSMUST00000059226	335.875	1.78811	0.424192	4.21534	2.49401e-05	0.00214958	Ensembl Transcript	101847	Ifi205
ENSMUST00000172538	103.508	1.83074	0.205472	8.90993	5.10669e-19	8.54285e-16	Ensembl Transcript	2442805	H2-T-ps
ENSMUST00000062145	6.84763	1.83224	0.544098	3.36747	0.000758605	0.0323325	Ensembl Transcript	3045314	4933430I17Rik
ENSMUST00000109813	25.4714	1.87397	0.428471	4.37363	1.22199e-05	0.00127765	Ensembl Transcript	88257	Camk2b
ENSMUST00000167624	365.23	1.87813	0.13401	14.0149	1.26319e-44	1.69053e-40	Ensembl Transcript	95742	Glo1
ENSMUST00000224001	57.4224	2.05917	0.303703	6.78022	1.19993e-11	7.29942e-09	Ensembl Transcript	1918576	Treml1
ENSMUST00000216328	12.4262	2.0914	0.400001	5.22848	1.70906e-07	3.14206e-05	Ensembl Transcript	2177482	Olfr99
ENSMUST00000016427	130.735	2.11151	0.415633	5.08022	3.76999e-07	6.30671e-05	Ensembl Transcript	95914	H2-M2
ENSMUST00000006956	31.7502	2.40826	0.555379	4.33625	1.44934e-05	0.00143678	Ensembl Transcript	98223	Saa3
ENSMUST00000113760	1321.49	2.43229	0.295091	8.24252	1.68615e-16	2.25658e-13	Ensembl Transcript	95958	H2-T24
ENSMUST00000024757	55.2735	2.44284	0.387141	6.30994	2.79147e-10	1.13207e-07	Ensembl Transcript	2682634	Enpp4
ENSMUST00000173900	27.6363	2.45021	0.323479	7.57455	3.60366e-14	3.47289e-11	Ensembl Transcript	1925060	A930015D03Rik
ENSMUST00000022722	8390.3	2.61282	0.520275	5.022	5.11354e-07	8.03011e-05	Ensembl Transcript	103206	Acod1
ENSMUST00000026845	33.2957	2.63074	0.68594	3.83522	0.000125449	0.00777264	Ensembl Transcript	96559	Il6
ENSMUST00000055671	568.297	2.92407	0.515134	5.67633	1.37617e-08	3.4106e-06	Ensembl Transcript	107657	Ifnb1
ENSMUST00000173128	15.4682	3.14341	0.508072	6.18694	6.13428e-10	2.1604e-07	Ensembl Transcript	5011869	Gm19684
ENSMUST00000122808	7.60613	4.22143	1.16772	3.61512	0.000300208	0.0155123	Ensembl Transcript	1860203	Cxcl11
ENSMUST00000021822	16.6642	21.3399	5.44689	3.91781	8.93558e-05	0.00583341	Ensembl Transcript	109278	Ogn

## Sheet: WT60 v KIKO60
WT time 60 versus KIKO time 60 min LPS
Row.names	baseMean	log2FoldChange	lfcSE	stat	pvalue	padj	Input.Type	MGI.Gene.Marker.ID	Symbol
ENSMUST00000182880	22.4086	-8.16885	0.956472	-8.54061	1.33519e-17	1.31481e-14	Ensembl Transcript	2442822	Ifi208
ENSMUST00000024774	2.03862	-4.3921	1.01565	-4.32443	1.52925e-05	0.0013366	Ensembl Transcript	1194489	Guca1b
ENSMUST00000048065	2.30092	-3.58121	1.08915	-3.28809	0.00100869	0.0240237	Ensembl Transcript	1930003	Trem3
ENSMUST00000065666	4.54174	-3.32842	0.838876	-3.96772	7.25643e-05	0.00378744	Ensembl Transcript	2667763	Retnlg
ENSMUST00000024984	3.33222	-2.85288	0.801463	-3.55959	0.00037143	0.0115019	Ensembl Transcript	3039635	Tmem204
ENSMUST00000068258	11.3561	-2.58239	0.304569	-8.47884	2.27443e-17	1.97621e-14	Ensembl Transcript	1918833	9130008F23Rik
ENSMUST00000115371	71.7559	-2.30192	0.139524	-16.4983	3.7716e-61	5.57103e-57	Ensembl Transcript	97960	Rnps1
ENSMUST00000063956	6.4285	-2.08791	0.50689	-4.11905	3.80437e-05	0.00238112	Ensembl Transcript	1916141	Cd177
ENSMUST00000214259	21.9523	-1.92266	0.28719	-6.69471	2.161e-11	1.27681e-08	Ensembl Transcript	2177494	Olfr111
ENSMUST00000042318	3.81262	-1.88832	0.591028	-3.19497	0.00139845	0.0300539	Ensembl Transcript	2444310	Fsd2
ENSMUST00000000161	8.77094	-1.70479	0.502404	-3.39327	0.000690643	0.0180238	Ensembl Transcript	1277979	Itgb2l
ENSMUST00000156873	8.63286	-1.61645	0.401856	-4.02246	5.75938e-05	0.00319819	Ensembl Transcript	1340899	Chil1
ENSMUST00000047399	6.80953	-1.57763	0.318976	-4.94594	7.57783e-07	0.000130154	Ensembl Transcript	1924846	Adgrf1
ENSMUST00000026845	33.2957	1.53302	0.33787	4.53731	5.69755e-06	0.000652391	Ensembl Transcript	96559	Il6
ENSMUST00000160565	201.671	1.53616	0.385796	3.9818	6.83964e-05	0.00360816	Ensembl Transcript	3646410	Ifi206
ENSMUST00000037994	54.7998	1.55498	0.370858	4.19294	2.75368e-05	0.00196496	Ensembl Transcript	1313259	Slfn1
ENSMUST00000224046	15.6606	1.57853	0.364664	4.32873	1.49973e-05	0.0013265	Ensembl Transcript	3698434	A330040F15Rik
ENSMUST00000122808	7.60613	1.64321	0.511892	3.21008	0.00132698	0.0290604	Ensembl Transcript	1860203	Cxcl11
ENSMUST00000056759	686.959	1.64324	0.36086	4.55367	5.27178e-06	0.000613145	Ensembl Transcript	1333785	Olfr56
ENSMUST00000106828	41.5034	1.73854	0.484465	3.58858	0.000332485	0.0105857	Ensembl Transcript	4821257	Trim30c
ENSMUST00000153546	221.024	1.74682	0.563696	3.09887	0.00194259	0.0375575	Ensembl Transcript	1927656	Ms4a4c
ENSMUST00000120770	400.263	1.75658	0.115995	15.1436	8.35095e-52	4.11173e-48	Ensembl Transcript	3649615	Gm13443
ENSMUST00000019464	21.1948	1.77012	0.277462	6.37966	1.77479e-10	9.70941e-08	Ensembl Transcript	1919143	Noxo1
ENSMUST00000140417	4.70254	1.79123	0.499942	3.58287	0.000339834	0.0107291	Ensembl Transcript	2142489	Ido2
ENSMUST00000055671	568.297	1.80683	0.444683	4.06319	4.84063e-05	0.00289478	Ensembl Transcript	107657	Ifnb1
ENSMUST00000168254	82.4584	1.80904	0.531243	3.4053	0.000660924	0.0176197	Ensembl Transcript	3650685	Ifit1bl1
ENSMUST00000102824	1727.2	1.81615	0.411996	4.40818	1.04242e-05	0.00100254	Ensembl Transcript	99450	Ifit1
ENSMUST00000113093	9.89385	1.84538	0.506522	3.64324	0.000269227	0.00901758	Ensembl Transcript	1352449	Cxcl9
ENSMUST00000046745	33.1735	1.85624	0.445864	4.16324	3.13764e-05	0.00213542	Ensembl Transcript	3710083	Tgtp2
ENSMUST00000167624	365.23	1.89771	0.120178	15.7908	3.59906e-56	2.65809e-52	Ensembl Transcript	95742	Glo1
ENSMUST00000119467	246.566	1.91759	0.436708	4.391	1.1283e-05	0.00106153	Ensembl Transcript	3649299	Gm12250
ENSMUST00000110081	4.08036	1.93097	0.612079	3.15477	0.00160627	0.0328473	Ensembl Transcript	1933993	Kcnn1
ENSMUST00000066912	30.7544	1.94257	0.417317	4.65491	3.24116e-06	0.000412717	Ensembl Transcript	1926259	Iigp1
ENSMUST00000224001	57.4224	1.94691	0.284847	6.83494	8.20409e-12	5.5083e-09	Ensembl Transcript	1918576	Treml1
ENSMUST00000162353	14.0623	1.95265	0.389704	5.01059	5.42637e-07	9.89542e-05	Ensembl Transcript	3612703	A530040E14Rik
ENSMUST00000102825	805.085	1.96637	0.476734	4.12467	3.71272e-05	0.00235351	Ensembl Transcript	1101055	Ifit3
ENSMUST00000190447	116.38	1.97678	0.416223	4.74934	2.04082e-06	0.000295539	Ensembl Transcript	97244	Mx2
ENSMUST00000006956	31.7502	1.98344	0.437342	4.53522	5.75425e-06	0.000653816	Ensembl Transcript	98223	Saa3
ENSMUST00000188363	16.8438	1.98675	0.361372	5.4978	3.84552e-08	1.15923e-05	Ensembl Transcript	5579990	Gm29284
ENSMUST00000135184	917.958	2.01452	0.410388	4.90883	9.16207e-07	0.00015037	Ensembl Transcript	97243	Mx1
ENSMUST00000219513	3.49837	2.03605	0.635477	3.20398	0.00135543	0.0293789	Ensembl Transcript	1924652	9530018F02Rik
ENSMUST00000216328	12.4262	2.07905	0.358859	5.79351	6.89324e-09	2.61077e-06	Ensembl Transcript	2177482	Olfr99
ENSMUST00000169041	4.18908	2.08119	0.680318	3.05914	0.00221974	0.0412425	Ensembl Transcript	1926156	Misp
ENSMUST00000166912	7.61824	2.12819	0.568756	3.74183	0.000182687	0.00693693	Ensembl Transcript	3648476	Phf11c
ENSMUST00000050011	9.00666	2.14272	0.676498	3.16737	0.00153823	0.0320469	Ensembl Transcript	5663439	Gm43302
ENSMUST00000172538	103.508	2.15205	0.187414	11.4829	1.60855e-30	4.75199e-27	Ensembl Transcript	2442805	H2-T-ps
ENSMUST00000020969	1133.81	2.18703	0.398909	5.48252	4.19299e-08	1.2144e-05	Ensembl Transcript	99830	Cmpk2
ENSMUST00000076249	130.751	2.19063	0.502106	4.36289	1.28356e-05	0.00118497	Ensembl Transcript	3698419	Ifit3b
ENSMUST00000007156	6.72017	2.34758	0.673615	3.48505	0.000492041	0.0143872	Ensembl Transcript	892023	Klk1b11
ENSMUST00000178990	3.93663	2.35608	0.789581	2.98396	0.00284546	0.0491582	Ensembl Transcript	3704307	Proscos
ENSMUST00000149829	3088.09	2.36151	0.494684	4.77377	1.80811e-06	0.000269773	Ensembl Transcript	99449	Ifit2
ENSMUST00000143783	3.71012	2.36693	0.681545	3.4729	0.000514876	0.0147103	Ensembl Transcript	96785	Lhx2
ENSMUST00000020970	3786	2.38358	0.413597	5.76304	8.26136e-09	3.0433e-06	Ensembl Transcript	1929628	Rsad2
ENSMUST00000113760	1321.49	2.46736	0.263714	9.3562	8.2654e-21	1.10989e-17	Ensembl Transcript	95958	H2-T24
ENSMUST00000173128	15.4682	2.47031	0.348737	7.0836	1.40453e-12	1.03731e-09	Ensembl Transcript	5011869	Gm19684
ENSMUST00000024757	55.2735	2.73645	0.323999	8.44585	3.0183e-17	2.47685e-14	Ensembl Transcript	2682634	Enpp4
ENSMUST00000173900	27.6363	2.90104	0.289539	10.0195	1.25095e-23	3.07963e-20	Ensembl Transcript	1925060	A930015D03Rik
ENSMUST00000024805	1.59419	3.35128	1.00029	3.3503	0.000807254	0.0201143	Ensembl Transcript	2385908	Cpne5
ENSMUST00000098827	2.47884	3.42304	1.0566	3.23967	0.00119666	0.0271026	Ensembl Transcript	3641851	Gm10684
ENSMUST00000018610	4.13099	3.50274	0.786203	4.45526	8.37908e-06	0.000859496	Ensembl Transcript	97361	Nos2
ENSMUST00000122936	1.53999	3.80004	1.23943	3.06595	0.00216978	0.0406724	Ensembl Transcript	1918253	Prss41
ENSMUST00000024928	1.45132	3.9094	1.28295	3.04719	0.0023099	0.0423845	Ensembl Transcript	1916698	Prss21
ENSMUST00000094972	1.69114	4.37254	1.19545	3.65765	0.000254537	0.00862333	Ensembl Transcript	107668	Ifna1
ENSMUST00000172895	4.41787	5.57226	0.914832	6.09102	1.12193e-09	4.60335e-07	Ensembl Transcript	3779814	Gm8810
ENSMUST00000021822	16.6642	22.336	4.85769	4.59806	4.26437e-06	0.000524909	Ensembl Transcript	109278	Ogn
