# Supplementary material for: p38γ and p38δ modulate innate immune response by regulating MEF2D activation
Source: eLife journal article supplement (doi:10.7554/elife.86200), 2023-07-17
Supplement: supp [file Figure 4-figure supplement 4-source data 2.xlsx]

## Sheet: Phospho (STY)Sites
Proteins	Positions within proteins	Leading proteins	Protein	Protein names	Gene names	Fasta headers	Localization prob	Score diff	PEP	Score	Delta score	Score for localization	Number of Phospho (STY)	Amino acid	Sequence window	Modification window	Peptide window coverage	Phospho (STY) Probabilities	Phospho (STY) Score diffs	Position in peptide	Charge	Mass error [ppm]	WT1	WT2	WT3	WT4	WT5	WT6	KIKO1	KIKO2	KIKO3	KIKO4	KIKO5	KIKO6	DKO1	DKO2	DKO3	DKO4	DKO5	DKO6	Positions	Position	Peptide IDs	Mod. peptide IDs	Evidence IDs	MS/MS IDs	Best localization evidence ID	Best localization MS/MS ID	Best localization raw file
A1IGU4	262	A1IGU4	A1IGU4	Rho guanine nucleotide exchange factor 37	Arhgef37		1	40.3516	0.0397519	40.352	6.555	40.352		S	TTRLSQMLKQEAGLVSRTEDKEFDDLEERFQ	X;X;X;X;X;X;X;X;X;X;X;X;X;X;X;Phospho (STY);X;X;X;X;X;X;X;X;X;X;X;X;X;X;X	XXXXXXXXXPPPPPPPPXXXXXXXXXXXXXX	QEAGLVS(1)R	QEAGLVS(40.35)R	7	2	-1.2264	0	0	0	532560	0	0	975120	0	0	0	0	0	0	0	0	0	0	0	262	262	1942	2137	27693;27694	27357	27693	27357	Service_Sonenberg_150119_7
A2A5R2	227	A2A5R2	A2A5R2	Brefeldin A-inhibited guanine nucleotide-exchange protein 2	Arfgef2		0.905151	9.8069	3.45957e-12	58.168	50.271	44.365	1	S	MQSKPQSPVIQATAGSPKFSRLKQSQAQSKP	X;X;X;X;X;X;X;X;X;X;X;X;X;X;X;Phospho (STY);X;X;X;X;X;X;X;X;X;X;X;X;X;X;X	PPPPPPPPPPPPPPPPPPXXXXXXXXXXXXX	ELEKPMQSKPQSPVIQAT(0.095)AGS(0.905)PK	ELEKPMQS(-40.87)KPQS(-37.98)PVIQAT(-9.81)AGS(9.81)PK	21	3	0.40052	0	0	0	2287800	2270400	2653400	13739000	7716600	8412800	6061500	2468600	3936700	0	8079000	10395000	2463200	4077400	4918400	227	227	661	720	9243;9244;9245;9246;9247;9248;9249;9250;9251;9252;9253;9254;9255;9256	10034;10035	9243	10034	Service_Sonenberg_150119_8
A2A5R2	276	A2A5R2	A2A5R2	Brefeldin A-inhibited guanine nucleotide-exchange protein 2	Arfgef2		0.999999	62.6495	1.72457e-20	117.14	36.43	117.14	1	S	GKVSLENGEAPRERGSPVSGRAEPSRGTDSG	X;X;X;X;X;X;X;X;X;X;X;X;X;X;X;Phospho (STY);X;X;X;X;X;X;X;X;X;X;X;X;X;X;X	XXXXXXXXXXXXPPPPPPPPPXXXXXXXXXX	ERGS(1)PVSGR	ERGS(62.65)PVS(-62.65)GR	4	2	0.19145	150930000	27287000	167130000	125780000	137900000	26891000	154050000	44420000	117440000	168050000	121900000	0	125260000	80192000	90033000	60201000	61598000	48398000	276	276	722	783	10021;10022;10023;10024;10025;10026;10027;10028;10029;10030;10031;10032;10033;10034;10035;10036;10037;10038;10039;10040;10041;10042;10043;10044;10045	10635;10636;10637;10638;10639;10640;10641;10642;10643;10644;10645;10646;10647;10648;10649;10650;10651;10652;10653;10654;10655;10656;10657;10658;10659;10660;10661;10662;10663;10664;10665;10666;10667;10668	10026	10643	Service_Sonenberg_150119_5
A2A7S8	340	A2A7S8	A2A7S8	Uncharacterized protein KIAA1522	Kiaa1522		0.718261	5.08564	0.00958031	47.334	30.342	42.802	1	S	SPASVRSLGRFSSASSPRPRSRNASSSSDNW	X;X;X;X;X;X;X;X;X;X;X;X;X;X;X;Phospho (STY);X;X;X;X;X;X;X;X;X;X;X;X;X;X;X	XXXXXXXXXXPPPPPPPPPPXXXXXXXXXXX	FS(0.003)S(0.056)AS(0.223)S(0.718)PRPR	FS(-24.47)S(-11.04)AS(-5.09)S(5.09)PRPR	6	2	0.20376	609500	0	0	0	718670	0	2642700	0	1357400	1775900	874990	0	0	1816700	0	0	0	613890	340	340	829	903	11610;11611;11612;11613;11614;11615;11616;11617	12250;12251;12252	11610	12250	Service_Sonenberg_150119_5
A2A7S8	402	A2A7S8	A2A7S8	Uncharacterized protein KIAA1522	Kiaa1522		0.94501	12.4702	3.8394e-13	67.275	60.147	67.275	1	S	SNNVAPPPPGGSGRGSPSGGSTAETSDTASI	X;X;X;X;X;X;X;X;X;X;X;X;X;X;X;Phospho (STY);X;X;X;X;X;X;X;X;X;X;X;X;X;X;X	XXXXXXXXXXXXXXPPPPPPPPPPPPPPPPP	GS(0.945)PS(0.054)GGS(0.001)TAETSDTASIR	GS(12.47)PS(-12.47)GGS(-28.49)T(-38.3)AET(-55.3)S(-62.37)DT(-65.58)AS(-65.5)IR	2	2	-0.66489	776650	0	507890	1080200	0	0	835510	0	535260	561780	408250	0	0	723830	0	292390	0	0	402	402	1016	1096	13871;13872;13873;13874;13875;13876;13877;13878;13879	14199;14200;14201	13871	14199	Service_Sonenberg_150119_1
A2A7S8	909	A2A7S8	A2A7S8	Uncharacterized protein KIAA1522	Kiaa1522		1	49.1878	8.84498e-13	66.325	54.369	49.188	1	S	IFSKGTKKLQLERPVSPEAQADLQRNLVAEL	X;X;X;X;X;X;X;X;X;X;X;X;X;X;X;Phospho (STY);X;X;X;X;X;X;X;X;X;X;X;X;X;X;X	XXXXXXXPPPPPPPPPPPPPPPPPPXXXXXX	LQLERPVS(1)PEAQADLQR	LQLERPVS(49.19)PEAQADLQR	8	3	0.56811	0	393550	0	1280500	855440	691300	0	445760	0	0	0	0	0	0	898000	857680	0	1420000	909	909	1386;1633	1504;1773	19762;19763;19764;23195;23196;23197;23198;23199;23200;23201;23202	20197;20198;20199;20200;23394;23395	23196	23395	Service_Sonenberg_150119_18
A2A7S8	1003	A2A7S8	A2A7S8	Uncharacterized protein KIAA1522	Kiaa1522		0.999752	36.0546	0.000497391	74.611	57.246	65.395	1	S	AENGGVQLAATEKMGSPGSDPQKKLV_____	X;X;X;X;X;X;X;X;X;X;X;X;X;Oxidation (M);X;Phospho (STY);X;X;X;X;X;X;X;X;X;X;X;X;X;X;X	XXXXXXXXXXXXXPPPPPPPPPPPXXXXXXX	MGS(1)PGSDPQKK	MGS(36.05)PGS(-36.05)DPQKK	3	2	0.28899	4711900	1030700	2845400	12324000	2788300	2159000	5812800	1079400	5682900	7734300	5794600	4112200	1421100	6866900	3580900	5829900	6125000	4406800	1003	1003	1716	1871;1872	24266;24267;24268;24269;24270;24271;24272;24273;24274;24275;24276;24277;24278;24279;24280;24281;24282;24283;24284;24285;24286	24257;24258;24259;24260;24261;24262;24263;24264;24265;24266;24267;24268;24269;24270;24271;24272;24273;24274;24275;24276;24277;24278;24279;24280;24281;24282;24283;24284;24285	24272	24266	Service_Sonenberg_150119_7
A2A7S8	445	A2A7S8	A2A7S8	Uncharacterized protein KIAA1522	Kiaa1522		0.909756	10.4089	0.00805658	44.299	29.633	44.299	1	S	LRKMKRPPPPPRRTYSLHQRGSAVPDGPLGL	X;X;X;X;X;X;X;X;X;X;X;X;X;X;X;Phospho (STY);X;X;X;X;X;X;X;X;X;X;X;X;X;X;X	XXXXXXXXXXXXPPPPPPPPXXXXXXXXXXX	RT(0.083)Y(0.007)S(0.91)LHQR	RT(-10.41)Y(-20.87)S(10.41)LHQR	4	3	-0.76186	838560	92230	0	0	0	0	1375400	327580	1688100	1220100	585360	537730	300300	975940	720770	0	0	532710	445	445	2342	2572	33578;33579;33580;33581;33582;33583;33584;33585;33586;33587;33588;33589	33048	33578	33048	Service_Sonenberg_150119_7
A2A7S8	610	A2A7S8	A2A7S8	Uncharacterized protein KIAA1522	Kiaa1522		0.999387	32.12	0.000979555	68.44	60.75	68.44	1	S	DRFVIPPHPKVPAPFSPPPSKSKSSNQAAPV	X;X;X;X;X;X;X;X;X;X;X;X;X;X;X;Phospho (STY);X;X;X;X;X;X;X;X;X;X;X;X;X;X;X	XXXXXXXXXXPPPPPPPPPPPXXXXXXXXXX	VPAPFS(0.999)PPPS(0.001)K	VPAPFS(32.12)PPPS(-32.12)K	6	2	-0.0058746	0	0	383550	1168600	818660	367520	950220	116040	480000	1097300	543470	600810	220030	374290	0	861700	1184400	0	610	610	3352	3687	48467;48468;48469;48470;48471;48472;48473;48474;48475;48476;48477;48478;48479;48480	48842;48843;48844;48845;48846;48847;48848;48849;48850;48851;48852;48853;48854;48855;48856;48857;48858;48859;48860	48470	48845	Service_Sonenberg_150119_7
A2A884	488	A2A884	A2A884	Transcription factor HIVEP3	Hivep3		0.370886	0.49439	0.0120337	43.297	24.918	43.297		S	EIDSVKPRRSSLTRRSSVESPKSSLYRDSLS	X;X;X;X;X;X;X;X;X;X;X;X;X;X;X;Phospho (STY);X;X;X;X;X;X;X;X;X;X;X;X;X;X;X	XXXXXXXXXXXXXXPPPPPPPPXXXXXXXXX	RS(0.371)S(0.331)VES(0.298)PK	RS(0.49)S(-0.49)VES(-0.95)PK	2	2	-0.32763	0	0	0	0	0	0	0	0	0	0	0	0	0	0	0	0	0	0	488	488	2316	2544			33017	32440	Service_Sonenberg_150119_12
A2A884	489	A2A884	A2A884	Transcription factor HIVEP3	Hivep3		0.889583	9.38593	0.00253913	73.499	57.618	60.547	1	S	IDSVKPRRSSLTRRSSVESPKSSLYRDSLSS	X;X;X;X;X;X;X;X;X;X;X;X;X;X;X;Phospho (STY);X;X;X;X;X;X;X;X;X;X;X;X;X;X;X	XXXXXXXXXXXXXPPPPPPPPXXXXXXXXXX	RS(0.102)S(0.89)VES(0.008)PK	RS(-9.39)S(9.39)VES(-20.49)PK	3	2	-0.43328	2387000	1184700	0	3983900	0	0	5332300	0	0	6747800	4260900	0	0	3135300	0	0	0	1300800	489	489	2316	2544	33010;33011;33012;33013;33015;33016;33020;33021	32431;32432;32433;32434;32435;32438;32439;32443	33013	32434	Service_Sonenberg_150119_7
A2A884	492	A2A884	A2A884	Transcription factor HIVEP3	Hivep3		0.886176	9.14996	0.00262122	66.299	43.227	66.299	1	S	VKPRRSSLTRRSSVESPKSSLYRDSLSSHGE	X;X;X;X;X;X;X;X;X;X;X;X;X;X;X;Phospho (STY);X;X;X;X;X;X;X;X;X;X;X;X;X;X;X	XXXXXXXXXXPPPPPPPPXXXXXXXXXXXXX	RS(0.006)S(0.108)VES(0.886)PK	RS(-21.66)S(-9.15)VES(9.15)PK	6	2	-0.03794	0	0	0	0	0	0	0	0	0	0	0	0	0	0	0	0	2579600	0	492	492	2316	2544	33019	32442	33019	32442	Service_Sonenberg_150119_17
A2A9F4	10	A2A9F4	A2A9F4	Keratinocyte differentiation factor 1	Kdf1		1	63.1805	5.35161e-06	63.181	37.533	63.181	2	S	______MPRPGQPRPSSGPPRLGPWERPSEL	X;X;X;X;X;X;X;X;X;X;X;Deamidation (NQ);X;X;X;Phospho (STY);Phospho (STY);X;X;X;X;X;X;X;X;X;X;X;X;X;X	XXXXXXPPPPPPPPPPPPPPPXXXXXXXXXX	MPRPGQPRPS(1)S(1)GPPR	MPRPGQPRPS(63.18)S(63.18)GPPR	10	2	-2.875	0	1056300	798320	0	0	1533800	2882300	691780	0	2043300	0	1400000	1554700	0	0	3489800	0	1785300	10	10	1735	1895	24496;24497;24498;24499;24500;24501;24502;24503;24504;24505	24436;24437	24497	24437	Service_Sonenberg_150119_10
A2A9F4	11	A2A9F4	A2A9F4	Keratinocyte differentiation factor 1	Kdf1		1	63.1805	5.35161e-06	63.181	37.533	63.181	2	S	_____MPRPGQPRPSSGPPRLGPWERPSELC	X;X;X;X;X;X;X;X;X;X;Deamidation (NQ);X;X;X;Phospho (STY);Phospho (STY);X;X;X;X;X;X;X;X;X;X;X;X;X;X;X	XXXXXPPPPPPPPPPPPPPPXXXXXXXXXXX	MPRPGQPRPS(1)S(1)GPPR	MPRPGQPRPS(63.18)S(63.18)GPPR	11	2	-2.875	0	1056300	798320	0	0	1533800	2882300	691780	0	2043300	0	1400000	1554700	0	0	3489800	0	1785300	11	11	1735	1895	24496;24497;24498;24499;24500;24501;24502;24503;24504;24505	24436;24437	24497	24437	Service_Sonenberg_150119_10
A2AAY5	672	A2AAY5	A2AAY5	SH3 and PX domain-containing protein 2B	Sh3pxd2b		1	91.6583	0.00418723	91.658	63.454	91.658	1	S	HVDIYNLRSKLRPAKSQEKALLDGESHHAAG	X;X;X;X;X;X;X;X;X;X;X;X;X;X;X;Phospho (STY);X;X;X;X;X;X;X;X;X;X;X;X;X;X;X	XXXXXXXXXXPPPPPPPPPXXXXXXXXXXXX	LRPAKS(1)QEK	LRPAKS(91.66)QEK	6	2	0.62198	0	0	0	0	0	0	0	0	0	0	0	0	0	0	0	0	0	804010	672	672	1644	1787	23404	23650	23404	23650	Service_Sonenberg_150119_18
A2AAY5	717	A2AAY5	A2AAY5	SH3 and PX domain-containing protein 2B	Sh3pxd2b		0.999966	44.6629	0.00353721	63.408	33.802	63.408	1	S	GPGHGQDRSGRQDGLSPKETPCRAPPRPAKT	X;X;X;X;X;X;X;X;X;X;X;X;X;X;X;Phospho (STY);X;X;X;X;X;X;X;X;X;X;X;X;X;X;X	XXXXXXXXPPPPPPPPPPXXXXXXXXXXXXX	SGRQDGLS(1)PK	S(-44.66)GRQDGLS(44.66)PK	8	2	-3.1473	0	0	0	0	0	0	0	0	0	12052000	10866000	0	0	0	0	0	0	0	717	717	2529	2781	36347;36348	36418;36419;36420	36347	36418	Service_Sonenberg_150119_10
A2AB59	458	A2AB59	A2AB59	Rho GTPase-activating protein 27	Arhgap27		0.453943	0	0.000166664	47.189	37.431	47.189		S	ELPQVPIPAPRSVRKSSQDSDTPAQASPPEE	X;X;X;X;X;X;X;X;X;X;X;X;X;X;X;Phospho (STY);X;X;X;X;X;X;X;X;X;X;X;X;X;X;X	XXXXXXXXXXXXXXPPPPPPPPPPPPPPPPP	KS(0.454)S(0.454)QDS(0.088)DT(0.004)PAQASPPEEK	KS(0)S(0)QDS(-7.12)DT(-20.56)PAQAS(-37.66)PPEEK	2	2	-0.24187	0	0	0	0	0	0	0	0	0	0	0	0	0	0	0	0	0	0	458	458	1473	1600			20994	21536	Service_Sonenberg_150119_12
A2AB59	459	A2AB59	A2AB59	Rho GTPase-activating protein 27	Arhgap27		0.453943	0	0.000166664	47.189	37.431	47.189		S	LPQVPIPAPRSVRKSSQDSDTPAQASPPEEK	X;X;X;X;X;X;X;X;X;X;X;X;X;X;X;X;X;X;X;X;X;X;X;X;X;X;X;X;X;X;X	XXXXXXXXXXXXXXXXXXXXXXXXXXXXXXX	KS(0.454)S(0.454)QDS(0.088)DT(0.004)PAQASPPEEK	KS(0)S(0)QDS(-7.12)DT(-20.56)PAQAS(-37.66)PPEEK	3	2	-0.24187	0	0	0	0	0	0	0	0	0	0	0	0	0	0	0	0	0	0	459	459	1473	1600			20994	21536	Service_Sonenberg_150119_12
A2AF47	797	A2AF47	A2AF47	Dedicator of cytokinesis protein 11	Dock11		1	52.7253	0.00317621	61.56	19.369	52.725	1	S	PPGYLNVNDAESRRQSNADIKWVDGAKPLLK	X;X;X;X;X;X;X;X;X;X;X;X;X;X;X;Phospho (STY);X;X;X;X;X;X;X;X;X;X;X;X;X;X;X	XXXXXXXXXXXXXPPPPPPPPXXXXXXXXXX	RQS(1)NADIK	RQS(52.73)NADIK	3	2	0.47807	1339100	612060	0	3033700	878310	0	1625400	599170	1666300	4564600	1347800	0	0	1827100	635280	1690800	2092200	855800	797	797	2249	2471	32016;32017;32018;32019;32020;32021;32022;32023;32024;32025;32026;32027;32028;32029	31544;31545;31546;31547;31548;31549;31550	32022	31550	Service_Sonenberg_150119_17
A2AG58	205	A2AG58	A2AG58	Uncharacterized protein CXorf23 homolog			0.998245	27.5558	0.000762265	73.435	54.81	73.435	1	S	DELRHQRVQEESYPQSPRRGSEDFGTRNPFQ	X;X;X;X;X;X;X;X;X;X;X;X;X;X;X;Phospho (STY);X;X;X;X;X;X;X;X;X;X;X;X;X;X;X	XXXXXXXPPPPPPPPPPPXXXXXXXXXXXXX	VQEES(0.002)YPQS(0.998)PR	VQEES(-27.56)Y(-56.2)PQS(27.56)PR	9	2	-0.29782	0	0	0	0	0	428890	889840	393730	800270	689720	1016200	542770	841890	650530	661090	986920	726360	456830	205	205	3361	3696	48582;48583;48584;48585;48586;48587;48588;48589;48590;48591;48592;48593;48594	48941;48942;48943;48944;48945	48586	48945	Service_Sonenberg_150119_16
A2AH22	1206	A2AH22	A2AH22	Activating molecule in BECN1-regulated autophagy protein 1	Ambra1		0.5854	4.51389	0.00438708	46.39	27.614	46.39	1	S	RSSQTGTESGAARTSSPQPSTSRGLPSEPGQ	X;X;X;X;X;X;X;X;X;X;X;X;X;X;X;Phospho (STY);X;X;X;X;X;X;X;X;X;X;X;X;X;X;X	XXXXXXXXXXXXXPPPPPPPPPPXXXXXXXX	T(0.207)S(0.207)S(0.585)PQPSTSR	T(-4.51)S(-4.51)S(4.51)PQPS(-35.6)T(-35.6)S(-34.93)R	3	2	1.2451	30872000	0	0	0	0	3082800	0	1996600	0	29213000	0	0	0	25868000	13187000	11688000	0	4777500	1206	1206	3209	3528	46453;46454;46455;46456;46457;46458;46459;46460	47205	46453	47205	Service_Sonenberg_150119_8
A2AIV2	173	A2AIV2	A2AIV2	Protein virilizer homolog	Kiaa1429		1	45.0114	1.06006e-23	99.441	87.127	45.011	1	S	NLKHADGEKEDQFNGSPPRPQPRGPRTPPGP	X;X;X;X;X;X;X;X;X;X;X;Deamidation (NQ);X;Deamidation (NQ);X;Phospho (STY);X;X;X;X;X;X;X;X;X;X;X;X;X;X;X	XXXPPPPPPPPPPPPPPPPPPPPXXXXXXXX	HADGEKEDQFNGS(1)PPRPQPR	HADGEKEDQFNGS(45.01)PPRPQPR	13	4	2.5333	883220	1554600	0	2347300	0	0	3865400	1434300	582740	4406000	3060400	345310	714030	4455800	452310	575060	4003700	0	173	173	1058	1142;1143	14504;14505;14506;14507;14508;14509;14510;14511;14512;14513;14514;14515;14516;14517;14518;14519;14520;14521;14522;14523;14524;14525;14526;14527;14528;14529;14530;14531;14532;14533;14534;14535;14536;14537	14959;14960;14961;14962;14963;14964;14965;14966;14967;14968;14969;14970;14971;14972;14973;14974;14975;14976;14977;14978;14979;14980;14981;14982;14983;14984;14985;14986;14987;14988;14989;14990;14991	14524	14990	Service_Sonenberg_150119_18
A2AIV2	1577	A2AIV2	A2AIV2	Protein virilizer homolog	Kiaa1429		0.560789	1.31148	0.0010446	67.153	55.306	67.153	1	S	FDLHSELERSFLSEPSSPGRSKTTKGFKLGK	X;X;X;X;X;X;X;X;X;X;X;X;X;X;X;Phospho (STY);X;X;X;X;X;X;X;X;X;X;X;X;X;X;X	XXXXXXXXXPPPPPPPPPPPXXXXXXXXXXX	SFLS(0.025)EPS(0.561)S(0.415)PGR	S(-42.38)FLS(-13.59)EPS(1.31)S(-1.31)PGR	7	2	0.080957	0	0	0	0	0	0	0	0	0	0	0	0	1932100	0	0	0	0	0	1577	1577	2481	2725	35637	35582;35583	35637	35583	Service_Sonenberg_150119_13
A2AIV2	1578	A2AIV2	A2AIV2	Protein virilizer homolog	Kiaa1429		0.989067	19.5745	1.15874e-07	124.42	107.89	100.55	1	S	DLHSELERSFLSEPSSPGRSKTTKGFKLGKH	X;X;X;X;X;X;X;X;X;X;X;X;X;X;X;Phospho (STY);X;X;X;X;X;X;X;X;X;X;X;X;X;X;X	XXXXXXXXPPPPPPPPPPPXXXXXXXXXXXX	SFLSEPS(0.011)S(0.989)PGR	S(-68.79)FLS(-46.08)EPS(-19.57)S(19.57)PGR	8	2	0.045335	5218900	2636300	2493900	0	2772700	2436400	4493900	1884900	2924600	0	1603800	1444200	0	2134100	2184500	1818200	3641000	2766200	1578	1578	2481	2725	35626;35627;35629;35630;35631;35632;35633;35635;35636;35638;35639;35640;35641;35642;35643	35556;35557;35558;35559;35560;35561;35562;35566;35567;35568;35569;35570;35571;35572;35573;35574;35575;35578;35579;35580;35581;35584;35585;35586;35587;35588;35589;35590;35591;35592;35593;35594;35595;35596	35639	35587	Service_Sonenberg_150119_15
A2AJI0	401	A2AJI0	A2AJI0	MAP7 domain-containing protein 1	Map7d1		1	46.5277	5.41172e-05	83.877	64.218	46.528	1	S	PSGERPERRKPGAGGSPALARRRLEATPVQK	X;X;X;X;X;X;X;X;X;X;X;X;X;X;X;Phospho (STY);X;X;X;X;X;X;X;X;X;X;X;X;X;X;X	XXXXXXXXPPPPPPPPPPPPPXXXXXXXXXX	RKPGAGGS(1)PALAR	RKPGAGGS(46.53)PALAR	8	3	-0.68839	11648000	1285700	8426500	0	2905300	2421900	10796000	3100900	8245400	4407700	8967400	5143800	12129000	14555000	7103300	0	4432200	2216000	401	401	1412;2148	1533;2363	20045;20046;20047;20048;20049;20050;20051;20052;20053;20054;20055;20056;20057;20058;20059;20060;20061;20062;20063;20064;20065;20066;20067;20068;20069;20070;20071;20072;20073;20074;20075;20076;20077;30537;30538;30539;30540;30541;30542;30543;30544;30545;30546;30547;30548;30549	20454;20455;20456;20457;20458;20459;20460;20461;20462;20463;20464;20465;20466;20467;20468;20469;20470;20471;20472;20473;20474;20475;20476;20477;20478;20479;20480;20481;20482;20483;20484;20485;20486;20487;20488;20489;20490;20491;20492;20493;20494;20495;20496;20497;20498;20499;20500;20501;20502;20503;20504;20505;20506;20507;20508;20509;20510;20511;20512;20513;20514;20515;20516;20517;29967;29968;299…	30539	29970	Service_Sonenberg_150119_11
A2AJI0	114	A2AJI0	A2AJI0	MAP7 domain-containing protein 1	Map7d1		0.446672	1.21332	2.72482e-07	50.219	46.36	50.219		S	TPTATGPREAKPSRRSSQPSPTTVPASDSPP	X;X;X;X;X;X;X;X;X;X;X;X;X;X;X;Phospho (STY);X;X;X;X;X;X;X;X;X;X;X;X;X;X;X	XXXXXXXXXXXXXXPPPPPPPPPPPPPPPPP	RS(0.447)S(0.338)QPS(0.202)PT(0.007)T(0.007)VPASDSPPAKQDVK	RS(1.21)S(-1.21)QPS(-3.44)PT(-18.36)T(-18.36)VPAS(-40.76)DS(-44.51)PPAKQDVK	2	3	-0.34757	0	0	0	0	0	0	0	0	0	0	0	0	0	0	0	0	0	0	114	114	2311	2537			32915	32379	Service_Sonenberg_150119_10
A2AJT4	600	A2AJT4	A2AJT4	Arginine/serine-rich protein PNISR	Pnisr		0.708321	3.899	0.01258	58.37	26.892	58.37	1	S	SRTRGKLRDRRRSNRSSIERERRRNRSPSRD	X;X;X;X;X;X;X;X;X;X;X;X;X;X;X;Phospho (STY);X;X;X;X;X;X;X;X;X;X;X;X;X;X;X	XXXXXXXXXXXXPPPPPPPPXXXXXXXXXXX	S(0.003)NRS(0.708)S(0.289)IER	S(-23.65)NRS(3.9)S(-3.9)IER	4	2	0.48473	0	0	0	0	0	0	0	0	7233500	0	0	0	0	0	0	0	0	0	600	600	2688	2960	38658	38917	38658	38917	Service_Sonenberg_150119_9
A2AJT4	601	A2AJT4	A2AJT4	Arginine/serine-rich protein PNISR	Pnisr		0.802729	6.12071	0.00942621	64.82	22.61	64.82	1	S	RTRGKLRDRRRSNRSSIERERRRNRSPSRDR	X;X;X;X;X;X;X;X;X;X;X;X;X;X;X;Phospho (STY);X;X;X;X;X;X;X;X;X;X;X;X;X;X;X	XXXXXXXXXXXPPPPPPPPXXXXXXXXXXXX	S(0.001)NRS(0.196)S(0.803)IER	S(-28.4)NRS(-6.12)S(6.12)IER	5	2	1.3836	8869600	6798400	0	808300	0	1121600	9814800	3865800	0	0	2497400	1072900	0	11671000	4686400	1028800	1775000	891730	601	601	2688	2960	38656;38657;38659;38660;38661;38662;38663;38664;38665;38666;38667;38668;38669	38915;38916;38918	38657	38916	Service_Sonenberg_150119_8
A2AN08	1759	A2AN08	A2AN08	E3 ubiquitin-protein ligase UBR4	Ubr4		0.996414	25.1042	4.21424e-06	117.25	93.728	78.342	1	S	FQSEPRVSESLVRHASTSPADKAKVTISDGK	X;X;X;X;X;X;X;X;X;X;X;X;X;X;X;Phospho (STY);X;X;X;X;X;X;X;X;X;X;X;X;X;X;X	XXXXXXXXXXXXXPPPPPPPPPPPXXXXXXX	HAS(0.996)T(0.003)S(0.001)PADKAK	HAS(25.1)T(-25.1)S(-32.91)PADKAK	3	2	0.55268	0	0	0	0	0	510980	3092600	1055100	4602400	8682700	5412400	13290000	0	0	0	13700000	9025600	8018900	1759	1759	1064	1150	14663;14664;14665;14666;14667;14668;14669;14670;14671;14672;14673;14674;14675;14676	15123;15124;15125;15126;15127;15128;15129;15130	14665	15126	Service_Sonenberg_150119_12
A2AN08	2715	A2AN08	A2AN08	E3 ubiquitin-protein ligase UBR4	Ubr4		0.830462	6.98414	1.24804e-05	132.01	110.55	59.177	1	S	RVLRPRNKRRHVTLPSSPRSNTPMGDKDDDD	X;X;X;X;X;X;X;X;X;X;X;X;Phospho (STY);X;X;Phospho (STY);X;X;X;X;X;X;X;X;X;X;X;X;X;X;X	XXXXXXXXXPPPPPPPPPPXXXXXXXXXXXX	HVT(0.003)LPS(0.83)S(0.166)PR	HVT(-24.1)LPS(6.98)S(-6.98)PR	6	3	-0.7714	24068000	348430	11365000	11965000	14483000	648730	18914000	466550	18850000	27945000	14528000	15885000	1072600	16202000	15552000	16444000	23411000	430510	2715	2715	1172;2134	1275;1276;2349	16348;16350;16351;16352;16355;16358;16359;16360;16361;16362;16363;16364;16367;16368;16370;16371;16372;16374;16375;16377;16378;16384;16385;16386;16387;16388;16389;16390;16391;16392;16393;16394;16395;16396;16397;16398;16399;16400;30365;30366;30371;30377;30380	16705;16706;16707;16709;16710;16711;16712;16713;16714;16715;16719;16720;16721;16725;16726;16727;16728;16729;16730;16731;16732;16733;16734;16735;16741;16742;16743;16744;16745;16746;16747;16749;16750;16751;16752;16753;16754;16755;16756;16759;16760;16761;16762;16765;16766;16767;29849;29850;29851;29857;29858;29866	16361	16729	Service_Sonenberg_150119_10
A2AN08	2716	A2AN08	A2AN08	E3 ubiquitin-protein ligase UBR4	Ubr4		0.984567	18.0481	1.24804e-05	132.01	110.55	112.36	1	S	VLRPRNKRRHVTLPSSPRSNTPMGDKDDDDD	X;X;X;X;X;X;X;X;X;X;X;X;X;X;X;Phospho (STY);X;X;X;X;X;X;X;X;X;X;X;X;X;X;X	XXXXXXXXPPPPPPPPPPXXXXXXXXXXXXX	HVTLPS(0.015)S(0.985)PR	HVT(-66.36)LPS(-18.05)S(18.05)PR	7	2	0.14154	22729000	14051000	11365000	11965000	14483000	12668000	17452000	9326200	18056000	27272000	14084000	15419000	0	15681000	14653000	15724000	22779000	13435000	2716	2716	1172;2134	1275;1276;2349	16348;16349;16350;16351;16352;16353;16354;16355;16356;16357;16358;16360;16362;16364;16365;16367;16368;16369;16370;16372;16374;16376;16378;16381;16382;16384;16385;30367;30368;30369;30370;30372;30373;30374;30375;30376;30378;30379;30381;30382	16705;16706;16707;16708;16709;16710;16711;16712;16713;16714;16715;16716;16717;16718;16719;16720;16721;16722;16723;16724;16725;16726;16728;16730;16731;16733;16734;16735;16736;16741;16742;16743;16744;16745;16746;16747;16748;16749;16750;16751;16754;16755;16756;16759;16760;16763;16764;16766;29852;29853;29854;29855;29856;29859;29860;29861;29862;29863;29864;29865	16354	16718	Service_Sonenberg_150119_6
A2AN08	625	A2AN08	A2AN08	E3 ubiquitin-protein ligase UBR4	Ubr4		1	65.9125	7.5661e-10	113.24	95.872	90.412	1	S	PPPPPPPLESSPRVKSPNKQASGEKGNILAS	X;X;X;X;X;X;X;X;X;X;X;X;X;X;X;Phospho (STY);X;X;X;X;X;X;X;X;X;X;X;X;X;X;X	XXXXXXXXXXXXXPPPPPPPPPPPPXXXXXX	VKS(1)PNKQASGEK	VKS(65.91)PNKQAS(-65.91)GEK	3	2	-0.79134	3959600	0	4381500	2565700	0	0	0	1187100	3712900	0	0	0	0	5879600	3757600	2103600	4193300	1529700	625	625	3327	3659	48128;48129;48130;48131;48132;48133;48134;48135;48136;48137;48138;48139;48140;48141	48625;48626;48627;48628;48629;48630;48631;48632;48633;48634;48635	48138	48635	Service_Sonenberg_150119_17
A2APV2	171	A2APV2	A2APV2	Formin-like protein 2	Fmnl2		1	82.4525	0.00257032	91.853	55.266	82.452	1	S	STMESTVDKSKPWSRSIEDLHRGSNLPSPVG	X;X;X;X;X;X;X;X;X;X;X;X;X;X;X;Phospho (STY);X;X;X;X;X;X;X;X;X;X;X;X;X;X;X	XXXXXXXXXXXXXXXPPPPPPPXXXXXXXXX	S(1)IEDLHR	S(82.45)IEDLHR	1	2	0.46485	12793000	5673400	9899500	8138900	8971700	7030600	8933600	6341500	11148000	6659400	7524800	8980300	11620000	9784700	7480800	8101600	11789000	7244500	171	171	2579	2839	37079;37080;37081;37082;37083;37084;37085;37086;37087;37088;37089;37090;37091;37092;37093;37094;37095;37096	37142;37143;37144;37145;37146;37147;37148;37149;37150;37151;37152;37153;37154;37155;37156;37157;37158;37159;37160;37161;37162;37163;37164;37165;37166;37167;37168;37169;37170;37171;37172;37173;37174;37175;37176;37177;37178;37179;37180;37181;37182;37183;37184;37185;37186;37187	37094	37185	Service_Sonenberg_150119_18
A2AQ14	8	A2AQ14	A2AQ14	Protein Mis18-beta	Oip5		0.996376	24.4474	0.00020844	49.3	25.624	49.3	1	S	________MATLSRRSLRFLETQSRRDSCDT	X;X;X;X;X;X;X;X;X;X;X;X;X;X;X;Phospho (STY);X;X;X;X;X;X;X;X;X;X;X;X;X;X;X	XXXXXXXXXXXXXXPPPPPPPPPPPXXXXXX	RS(0.996)LRFLET(0.004)QSR	RS(24.45)LRFLET(-24.45)QS(-43.41)R	2	3	3.4211	0	0	0	0	0	0	0	0	0	0	0	0	0	0	0	0	0	0	8	8	2283	2507	32505;32506;32507;32508	31984;31985;31986;31987	32505	31984	Service_Sonenberg_150119_4
A2AR02	685	A2AR02	A2AR02	Peptidyl-prolyl cis-trans isomerase G	Ppig		0.999999	59.6116	1.19079e-15	139.48	100.76	126.32	1	S	NSSSNNREKKADREQSPVSKTKQSSQDNEVK	X;X;X;X;X;X;X;X;X;X;X;X;X;X;X;Phospho (STY);X;X;X;X;X;X;X;X;X;X;X;X;X;X;X	XXXXXXXXXPPPPPPPPPPPXXXXXXXXXXX	KADREQS(1)PVSK	KADREQS(59.61)PVS(-59.61)K	7	2	-1.7829	25698000	18678000	0	20705000	0	5690600	16849000	10636000	10557000	14451000	24952000	15222000	35595000	24287000	15768000	11166000	18456000	12125000	685	685	50;1280	53;1387	564;565;566;567;569;570;571;572;573;574;575;576;577;578;579;580;581;17857;17858;17859;17860;17861;17862;17863;17864;17865;17866;17867;17868;17869;17870;17871;17872;17873;17874	549;550;551;552;553;554;556;557;558;559;560;561;562;563;564;565;566;567;568;569;570;571;572;573;574;575;576;577;578;579;580;18107;18108;18109;18110;18111;18112;18113;18114;18115;18116;18117;18118;18119;18120;18121;18122;18123;18124;18125;18126;18127;18128;18129;18130;18131;18132;18133;18134	17861	18114	Service_Sonenberg_150119_5
A2AR02	688	A2AR02	A2AR02	Peptidyl-prolyl cis-trans isomerase G	Ppig		0.842054	7.26832	1.35798e-07	64.224	20.805	64.224	1	S	SNNREKKADREQSPVSKTKQSSQDNEVKSST	X;X;X;X;X;X;X;X;X;X;X;X;X;X;X;Phospho (STY);X;X;X;X;X;X;X;X;X;X;X;X;X;X;X	XXXXXXXPPPPPPPPPPXXXXXXXXXXXXXX	ADREQS(0.158)PVS(0.842)K	ADREQS(-7.27)PVS(7.27)K	9	2	-0.73517	0	0	0	0	0	0	0	0	0	0	0	0	0	0	0	0	0	0	688	688	50;1280	53;1387	568	555	568	555	Service_Sonenberg_150119_5
A2AR02	395	A2AR02	A2AR02	Peptidyl-prolyl cis-trans isomerase G	Ppig		1	41.4008	0.00141352	55.908	18.212	41.401	1	S	KGDKSELNEIKENQRSPVRVKEKKITDHRHM	X;X;X;X;X;X;X;X;X;X;X;X;X;X;X;Phospho (STY);X;X;X;X;X;X;X;X;X;X;X;X;X;X;X	XXXXXXXXXXXPPPPPPPPPPXXXXXXXXXX	ENQRS(1)PVRVK	ENQRS(41.4)PVRVK	5	3	0.0028362	2603200	634390	0	0	0	0	3853900	0	3878200	0	2617500	2598600	2053900	4427900	0	460900	1922900	691360	395	395	700;701	761;762	9739;9740;9741;9742;9743;9744;9745;9746;9747;9748;9749;9750;9751;9752;9753;9754;9755;9756;9757;9758;9759;9760;9761;9762;9763;9764;9765;9766;9767;9768;9769;9770	10381;10382;10383;10384;10385;10386;10387;10388;10389;10390;10391;10392	9754	10392	Service_Sonenberg_150119_9
A2AR02	354	A2AR02	A2AR02	Peptidyl-prolyl cis-trans isomerase G	Ppig		1	45.7899	0.00438122	45.79	30.552	45.79	2	S	YRTPSRSRSRDRFRRSETPPHWRQEMQRAQR	X;X;X;X;X;X;X;X;X;X;X;X;X;X;X;Phospho (STY);X;Phospho (STY);X;X;X;X;X;X;X;X;X;X;X;X;X	XXXXXXXXXXXXPPPPPPPPPPPXXXXXXXX	FRRS(1)ET(1)PPHWR	FRRS(45.79)ET(45.79)PPHWR	4	4	-0.52307	0	2091300	0	0	0	2092100	4306900	1154500	1428100	0	887070	814830	302060	688200	0	741400	1921600	2578600	354	354	822	896	11543;11544;11545;11546;11547;11548;11549;11550;11551;11552;11553;11554	12221;12222	11544	12222	Service_Sonenberg_150119_18
A2AR02	411	A2AR02	A2AR02	Peptidyl-prolyl cis-trans isomerase G	Ppig		1	47.3516	0.000857707	63.611	48.021	47.352	1;2	S	PVRVKEKKITDHRHMSESPNRKVEKEKKAKD	X;X;X;X;X;X;X;X;X;X;X;X;X;X;X;Phospho (STY);X;Phospho (STY);X;X;X;X;X;X;X;X;X;X;X;X;X	XXXXXXXXXXXXXPPPPPPPPPPPPXXXXXX	HMS(1)ES(1)PNRKVEK	HMS(47.35)ES(47.35)PNRKVEK	3	2	-0.51069	9543900	5124800	8255900	5582500	0	4426800	11684000	1464600	4072700	12247000	5035000	3386500	0	8718800	4605700	4354600	6908300	1464900	411	411	1110;1111	1199;1200;1201	15260;15261;15262;15263;15264;15265;15266;15267;15268;15269;15270;15271;15272;15273;15274;15275;15276;15277;15278;15279;15280;15281;15282;15283;15284;15285;15286;15287;15288;15289	15718;15719;15720;15721;15722;15723;15724;15725;15726;15727;15728;15729;15730;15731	15284	15731	Service_Sonenberg_150119_17
A2AR02	413	A2AR02	A2AR02	Peptidyl-prolyl cis-trans isomerase G	Ppig		1	47.3516	0.000857707	63.611	48.021	47.352	1;2	S	RVKEKKITDHRHMSESPNRKVEKEKKAKDHK	X;X;X;X;X;X;X;X;X;X;X;X;X;Phospho (STY);X;Phospho (STY);X;X;X;X;X;X;X;X;X;X;X;X;X;X;X	XXXXXXXXXXXPPPPPPPPPPPPXXXXXXXX	HMS(1)ES(1)PNRKVEK	HMS(47.35)ES(47.35)PNRKVEK	5	2	-0.51069	15796000	1864900	8255900	12243000	0	1638300	5639200	0	0	2736900	0	1343300	0	3511800	1843500	1405200	3673600	0	413	413	1110;1111	1199;1200;1201	15258;15259;15273;15274;15275;15276;15277;15278;15279;15280;15281;15282;15283;15284;15285;15286;15287;15288;15289	15716;15717;15720;15721;15722;15723;15724;15725;15726;15727;15728;15729;15730;15731	15284	15731	Service_Sonenberg_150119_17
A2AR02	714	A2AR02	A2AR02	Peptidyl-prolyl cis-trans isomerase G	Ppig		0.99056	20.2093	4.44673e-41	152	109.29	152	1	S	VKSSTLKNQEDEKTRSPVEKENQKSKGQEND	X;X;X;X;X;X;X;X;X;X;X;X;X;X;X;Phospho (STY);X;X;X;X;X;X;X;X;X;X;X;X;X;X;X	XXXXXXXXXXXXXPPPPPPPPPPPXXXXXXX	T(0.009)RS(0.991)PVEKENQK	T(-20.21)RS(20.21)PVEKENQK	3	2	-0.30688	10307000	7700500	4678200	5772800	0	3965400	12379000	5244300	13641000	3785700	6983100	0	0	18931000	5131600	3062200	5069500	4231500	714	714	3183	3502	46063;46064;46065;46066;46068;46069;46070;46071;46072;46073;46074;46075;46076;46077;46078;46079;46080;46081;46082;46083;46084;46085;46086;46087;46088;46089;46090;46091;46092	46915;46916;46917;46918;46920;46921;46922;46923;46924;46925;46926;46927;46928;46929;46930;46931;46932;46933;46934;46935;46936;46937;46938	46078	46932	Service_Sonenberg_150119_14
A2AWA9	42	A2AWA9	A2AWA9	Rab GTPase-activating protein 1	Rabgap1		0.999391	33.2371	1.64091e-20	90.475	80.331	90.475	1	S	LVSRQGDETPSTNNGSDDEKTGLKIVGNGSE	X;X;X;X;X;X;X;X;X;X;X;X;X;X;X;Phospho (STY);X;X;X;X;X;X;X;X;X;X;X;X;X;X;X	XXXXPPPPPPPPPPPPPPPPPPPPXXXXXXX	QGDETPSTNNGS(0.999)DDEKTGLK	QGDET(-59.71)PS(-39.69)T(-45.79)NNGS(33.24)DDEKT(-33.24)GLK	12	3	-0.12086	6673100	1819800	0	0	0	0	0	0	4248700	4301100	0	0	6610200	5875900	0	0	0	2466400	42	42	1952	2148	27813;27814;27815;27816;27817;27818;27819	27397;27398;27399;27400	27815	27399	Service_Sonenberg_150119_13
A2AWL7	286	A2AWL7	A2AWL7	MAX gene-associated protein	Mga		0.485554	0	4.24192e-05	53.169	41.89	53.169		S	GKQRNSSDQEGNSVSSSPAHRVRLTEGEGSE	X;X;X;X;X;X;X;X;X;X;X;X;X;X;X;Phospho (STY);X;X;X;X;X;X;X;X;X;X;X;X;X;X;X	XXXXPPPPPPPPPPPPPPPPPXXXXXXXXXX	NSSDQEGNSVS(0.029)S(0.486)S(0.486)PAHR	NS(-38.72)S(-39.58)DQEGNS(-32.65)VS(-12.31)S(0)S(0)PAHR	12	2	0.10133	0	0	0	0	0	0	0	0	0	0	0	0	0	0	0	0	0	0	286	286	1871	2058			26766	26514	Service_Sonenberg_150119_9
A2AWL7	287	A2AWL7	A2AWL7	MAX gene-associated protein	Mga		0.829818	7.00206	5.13183e-16	100.43	82.158	100.43	1	S	KQRNSSDQEGNSVSSSPAHRVRLTEGEGSEI	X;X;X;X;X;X;X;X;X;X;X;X;X;X;X;Phospho (STY);X;X;X;X;X;X;X;X;X;X;X;X;X;X;X	XXXPPPPPPPPPPPPPPPPPXXXXXXXXXXX	NSSDQEGNSVS(0.004)S(0.165)S(0.83)PAHR	NS(-68.17)S(-62.43)DQEGNS(-35.91)VS(-22.68)S(-7)S(7)PAHR	13	2	-0.021976	0	0	0	0	0	0	500670	0	0	0	0	0	0	0	0	0	0	0	287	287	1871	2058	26765	26513	26765	26513	Service_Sonenberg_150119_7
A2BH40	365	A2BH40	A2BH40	AT-rich interactive domain-containing protein 1A	Arid1a		0.997699	28.6375	1.73931e-19	85.062	75.531	85.062	1	S	AVSGGAQQRSHHAPMSPGSSGGGGQPLARTP	X;X;X;X;X;X;X;X;X;X;X;X;X;X;Oxidation (M);Phospho (STY);X;X;X;X;X;X;X;X;X;X;X;X;X;X;X	XXXXXXXXXPPPPPPPPPPPPPPPPPPPPXX	S(0.001)HHAPMS(0.998)PGS(0.001)SGGGGQPLAR	S(-32.7)HHAPMS(28.64)PGS(-28.64)S(-33.97)GGGGQPLAR	7	3	0.34908	3167500	3620800	3375200	0	4831300	5511600	0	3120100	3672700	12104000	0	6671700	0	0	0	0	6418600	5437100	365	365	2553	2811;2812	36721;36722;36723;36724;36725;36726;36727;36728;36729;36730;36731;36732;36733;36734;36735;36736;36737;36738;36739;36740;36741;36742	36777;36778;36779;36780;36781;36782;36783;36784;36785;36786;36787;36788;36789;36790;36791;36792;36793;36794;36795;36796;36797;36798	36721	36778	Service_Sonenberg_150119_1
A2CG63	778	A2CG63	A2CG63	AT-rich interactive domain-containing protein 4B	Arid4b		0.937837	12.0114	0.011587	60.102	29.538	60.102	1	S	NKVHTDLVIAKTVSKSPERLRKDMEAISEDT	X;X;X;X;X;X;X;X;X;X;X;X;X;X;X;Phospho (STY);X;X;X;X;X;X;X;X;X;X;X;X;X;X;X	XXXXXXXXXXXPPPPPPPPXXXXXXXXXXXX	T(0.003)VS(0.059)KS(0.938)PER	T(-24.75)VS(-12.01)KS(12.01)PER	5	2	2.2226	2658900	1012600	0	0	0	0	3168900	1618300	0	3116700	2456800	1520800	1858800	5733700	1883900	1296600	1912900	563560	778	778	3244	3567	46989;46990;46991;46992;46993;46994;46995;46996;46997;46998;46999;47000;47001;47002	47617;47618;47619;47620	46989	47617	Service_Sonenberg_150119_2
A2RSJ4	414	A2RSJ4	A2RSJ4	UHRF1-binding protein 1-like	Uhrf1bp1l		0.83886	6.41958	9.27045e-05	43.099	28.485	43.099	2	S	NVEMLKQAMKDRNLGSPPKSPTHASPQHTQT	X;X;X;X;X;X;X;X;X;X;X;X;X;X;X;Phospho (STY);X;X;X;Phospho (STY);X;X;X;X;X;X;X;X;X;X;X	XXXXXXXXXXXXPPPPPPPPPPPPPPPPPPP	NLGS(0.839)PPKS(0.828)PT(0.319)HAS(0.013)PQHTQTEK	NLGS(6.42)PPKS(6.17)PT(-6.17)HAS(-21.02)PQHT(-37.12)QT(-39.67)EK	4	3	-0.8389	9199000	0	0	376720	0	2978500	0	2013100	0	0	9709200	0	0	0	0	4450000	0	0	414	414	1821	1999	25951;25952;25953;25954;25955;25956	25870	25951	25870	Service_Sonenberg_150119_1
A2RSJ4	418	A2RSJ4	A2RSJ4	UHRF1-binding protein 1-like	Uhrf1bp1l		0.828262	6.17096	9.27045e-05	43.099	28.485	43.099	2	S	LKQAMKDRNLGSPPKSPTHASPQHTQTEKDS	X;X;X;X;X;X;X;X;X;X;X;Phospho (STY);X;X;X;Phospho (STY);X;X;X;X;X;X;X;X;X;X;X;X;X;X;X	XXXXXXXXPPPPPPPPPPPPPPPPPPPPPXX	NLGS(0.839)PPKS(0.828)PT(0.319)HAS(0.013)PQHTQTEK	NLGS(6.42)PPKS(6.17)PT(-6.17)HAS(-21.02)PQHT(-37.12)QT(-39.67)EK	8	3	-0.8389	9199000	0	0	376720	0	2978500	0	2013100	0	0	9709200	0	0	0	0	4450000	0	0	418	418	1821	1999	25951;25952;25953;25954;25955;25956	25870	25951	25870	Service_Sonenberg_150119_1
A2RTL5	45	A2RTL5	A2RTL5	Arginine/serine-rich coiled-coil protein 2	Rsrc2		0.999474	32.7872	0	167.3	141.02	165.35	1	S	NDKEHSSDKGRERLNSSENGEDRHKRKERKS	X;X;X;X;X;X;X;X;X;X;X;X;X;X;X;Phospho (STY);X;X;Deamidation (NQ);X;X;X;X;X;X;X;X;X;X;X;X	XXXXXXXXXXXPPPPPPPPPPPPPPXXXXXX	LNS(0.999)S(0.001)ENGEDRHK	LNS(32.79)S(-32.79)ENGEDRHK	3	2	0.27356	0	1716300	0	2440100	0	481390	0	588430	0	0	1577500	0	0	3686200	0	1979300	1705600	1236800	45	45	727;1618;1619	788;789;1758;1759	10143;10144;10145;10146;10147;10148;10149;10150;10151;10152;10153;10154;10155;10156;10157;10158;10159;10160;10161;10162;10163;23055;23056;23057;23058;23059;23060;23061;23062;23063;23064;23065;23066;23067;23068;23069;23070;23071;23072	10820;10821;10822;10823;10824;10825;10826;10827;10828;10829;10830;10831;10832;10833;10834;10835;10836;10837;10838;10839;23244;23245;23246;23247;23248;23249;23250;23251;23252;23253;23254;23255;23256;23257;23258;23259;23260	23062	23251	Service_Sonenberg_150119_9
A2RTL5	46	A2RTL5	A2RTL5	Arginine/serine-rich coiled-coil protein 2	Rsrc2		0.5	0	6.46882e-15	66.004	41.151	42.395	1	S	DKEHSSDKGRERLNSSENGEDRHKRKERKSS	X;X;X;X;X;X;X;X;X;X;X;X;X;X;X;X;X;X;X;X;X;X;X;X;X;X;X;X;X;X;X	XXXXXXXXXXXXXXXXXXXXXXXXXXXXXXX	LNS(0.5)S(0.5)ENGEDRHK	LNS(0)S(0)ENGEDRHK	4	2	-1.5348	0	0	0	0	0	0	0	0	0	0	0	0	0	0	0	0	0	0	46	46	727;1618;1619	788;789;1758;1759	10159;23058	10836;23247	23058	23247	Service_Sonenberg_150119_2
A3KGS3	375	A3KGS3	A3KGS3	Ral GTPase-activating protein subunit alpha-2	Ralgapa2		0.916155	12.2871	5.72658e-06	55.885	46.098	55.885	2	S	SHSNSSTLSDRRLSNSSLCSIEEEHRTVYEM	X;X;X;X;X;X;X;X;X;X;X;X;X;X;X;Phospho (STY);Phospho (STY);X;X;X;X;X;X;X;X;X;X;X;X;X;X	XXXXXXXXXXXPPPPPPPPPPPPPPPXXXXX	RLS(0.105)NS(0.916)S(0.91)LCS(0.069)IEEEHR	RLS(-11.8)NS(12.29)S(11.8)LCS(-13.92)IEEEHR	5	3	0.20771	1321600	366930	0	1031800	0	0	0	611850	0	879330	0	0	0	0	0	0	0	0	375	375	2173	2391	30955;30956;30957;30958;30959	30415;30416	30955	30416	Service_Sonenberg_150119_1
A3KGS3	376	A3KGS3	A3KGS3	Ral GTPase-activating protein subunit alpha-2	Ralgapa2		0.91031	11.7966	5.72658e-06	55.885	46.098	55.885	2	S	HSNSSTLSDRRLSNSSLCSIEEEHRTVYEMV	X;X;X;X;X;X;X;X;X;X;X;X;X;X;Phospho (STY);Phospho (STY);X;X;X;X;X;X;X;X;X;X;X;X;X;X;X	XXXXXXXXXXPPPPPPPPPPPPPPPXXXXXX	RLS(0.105)NS(0.916)S(0.91)LCS(0.069)IEEEHR	RLS(-11.8)NS(12.29)S(11.8)LCS(-13.92)IEEEHR	6	3	0.20771	1321600	366930	0	1031800	0	0	0	611850	0	879330	0	0	0	0	0	0	0	0	376	376	2173	2391	30955;30956;30957;30958;30959	30415;30416	30955	30416	Service_Sonenberg_150119_1
A3KGS3	818	A3KGS3	A3KGS3	Ral GTPase-activating protein subunit alpha-2	Ralgapa2		0.348439	0	3.24348e-09	59.429	46.002	54.974		S	HVTHEHEGITMLVRRSSSPAELELKDDLQQA	X;X;X;X;X;X;X;X;X;X;X;X;X;X;X;Phospho (STY);X;X;X;X;X;X;X;X;X;X;X;X;X;X;X	XXXXXXXXXXXXXXPPPPPPPPPPPPPPPPP	S(0.348)S(0.348)S(0.303)PAELELKDDLQQAHGR	S(0)S(0)S(-0.61)PAELELKDDLQQAHGR	1	3	-0.23294	0	0	0	0	0	0	0	0	0	0	0	0	0	0	0	0	0	0	818	818	2313;2893	2540;2541;3185			41862	42532	Service_Sonenberg_150119_8
A3KGS3	819	A3KGS3	A3KGS3	Ral GTPase-activating protein subunit alpha-2	Ralgapa2		0.830229	5.89981	3.24348e-09	59.429	46.002	55.437	2	S	VTHEHEGITMLVRRSSSPAELELKDDLQQAH	X;X;X;X;X;X;X;X;X;X;X;X;X;X;X;Phospho (STY);Phospho (STY);X;X;X;X;X;X;X;X;X;X;X;X;X;X	XXXXXXXXXXXXXPPPPPPPPPPPPPPPPPP	RS(0.34)S(0.83)S(0.83)PAELELKDDLQQAHGR	RS(-5.9)S(5.9)S(5.9)PAELELKDDLQQAHGR	3	4	-1.0656	0	0	0	0	0	0	0	0	667100	0	0	1196700	1056500	638430	0	2184500	3405600	0	819	819	2313;2893	2540;2541;3185	32983;32984;32985;32986;32987;32988	32409	32983	32409	Service_Sonenberg_150119_17
A3KGS3	820	A3KGS3	A3KGS3	Ral GTPase-activating protein subunit alpha-2	Ralgapa2		0.830229	5.89981	3.24348e-09	59.429	46.002	55.437	2	S	THEHEGITMLVRRSSSPAELELKDDLQQAHG	X;X;X;X;X;X;X;X;X;X;X;X;X;X;Phospho (STY);Phospho (STY);X;X;X;X;X;X;X;X;X;X;X;X;X;X;X	XXXXXXXXXXXXPPPPPPPPPPPPPPPPPPP	RS(0.34)S(0.83)S(0.83)PAELELKDDLQQAHGR	RS(-5.9)S(5.9)S(5.9)PAELELKDDLQQAHGR	4	4	-1.0656	0	0	0	0	0	0	0	0	667100	0	0	1196700	1056500	638430	0	2184500	3405600	0	820	820	2313;2893	2540;2541;3185	32983;32984;32985;32986;32987;32988	32409	32983	32409	Service_Sonenberg_150119_17
A3KGS3	765	A3KGS3	A3KGS3	Ral GTPase-activating protein subunit alpha-2	Ralgapa2		0.990816	20.7752	0.000334448	90.05	79.636	89.561	1	S	CDYLVVGQQQVPRSSSTSDITERLYSDSSQG	X;X;X;X;X;X;X;X;X;X;X;X;X;X;X;Phospho (STY);X;X;X;X;X;X;X;X;X;X;X;X;X;X;X	XXXXXXXXXXXXXPPPPPPPPPPXXXXXXXX	SSS(0.991)T(0.008)SDITER	S(-35.22)S(-35.22)S(20.78)T(-20.78)S(-35.22)DIT(-57.31)ER	3	2	-0.010478	10776000	2429500	7027100	6249200	4751400	4856500	11660000	2783800	5677100	5984400	10425000	6136600	0	9446100	4903000	5676400	7538300	2629600	765	765	2915	3207	42159;42160;42161;42162;42163;42164;42165;42166;42167;42168;42169;42170;42172;42173;42174;42175;42176	42826;42827;42828;42829;42830;42831;42832;42833;42834;42835;42836;42837;42838;42839;42840;42841;42842;42843;42844;42845;42846;42847;42848;42849;42850;42851;42852;42853;42854;42857;42858;42859;42860;42861;42862;42863;42864;42865;42866;42867;42868;42869;42870	42168	42850	Service_Sonenberg_150119_10
A3KGS3	486	A3KGS3	A3KGS3	Ral GTPase-activating protein subunit alpha-2	Ralgapa2		0.966118	17.3523	0.0042825	47.288	39.378	47.288	1	S	ESSGHKRSSSWGRTYSFTSAMSRGCVTEEDN	X;X;X;X;X;X;X;X;X;X;X;X;X;X;X;Phospho (STY);X;X;X;X;X;X;X;X;X;X;X;X;X;X;X	XXXXXXXXXXXXXPPPPPPPPPPXXXXXXXX	T(0.018)Y(0.01)S(0.966)FT(0.005)S(0.001)AMSR	T(-17.35)Y(-19.96)S(17.35)FT(-23.07)S(-28.31)AMS(-37.8)R	3	2	-1.6176	393000	0	166350	0	236840	269750	310620	214320	212910	282710	303360	240620	204890	221220	107210	296700	335360	293050	486	486	3255	3579	47144;47145;47146;47147;47148;47149;47150;47151;47152;47153;47154;47155;47156;47157;47158;47159	47786	47144	47786	Service_Sonenberg_150119_7
A6H5X4	17	A6H5X4	A6H5X4	PHD finger protein 11	Phf11		1	43.7698	0.011381	49.35	7.8106	43.77	1	S	AQETAPPCGPVSRGDSPIIEKMEKRTCALCP	X;X;X;X;X;X;X;X;X;X;X;X;X;X;X;Phospho (STY);X;X;X;X;X;X;X;X;X;X;X;X;X;X;X	XXXXXXXXXXXXXPPPPPPPPXXXXXXXXXX	GDS(1)PIIEK	GDS(43.77)PIIEK	3	2	-0.042159	2297100	2663300	0	0	0	1248800	1198300	1899100	2994700	1526000	1718700	1505900	3007300	1894200	0	0	1533500	1029100	17	17	870	944	12142;12143;12144;12145;12146;12147;12148;12149;12150;12151;12152;12153;12154	12685;12686	12143	12686	Service_Sonenberg_150119_8
A6H5X4	169	A6H5X4	A6H5X4	PHD finger protein 11	Phf11		0.754524	4.87663	0.00189394	49.243	27.572	49.243	1	S	DDPSMKKKRGKNKRLSSGPPAQPKTMKCSNA	X;X;X;X;X;X;X;X;X;X;X;X;X;X;X;Phospho (STY);X;X;X;X;X;X;X;X;X;X;X;X;X;X;X	XXXXXXXXXXXXXPPPPPPPPPPPXXXXXXX	RLS(0.755)S(0.245)GPPAQPK	RLS(4.88)S(-4.88)GPPAQPK	3	2	-0.089817	1052300	5084600	645450	0	0	2608000	904140	1072300	2102500	3142900	2256700	2071400	1735400	1486300	1582300	1662500	2191600	1483600	169	169	1666;2181	1811;2399	31077;31078;31079;31080;31081;31082;31083;31084;31085;31086;31087;31088;31089;31090;31091;31092	30608	31077	30608	Service_Sonenberg_150119_2
A6H5X4	170	A6H5X4	A6H5X4	PHD finger protein 11	Phf11		0.874428	8.4283	0.00414832	48.44	27.57	41.824	1	S	DPSMKKKRGKNKRLSSGPPAQPKTMKCSNAK	X;X;X;X;X;X;X;X;X;X;X;X;X;X;X;Phospho (STY);X;X;X;X;X;X;X;X;X;X;X;X;X;X;X	XXXXXXXXXXXXXPPPPPPPPPPXXXXXXXX	LS(0.126)S(0.874)GPPAQPK	LS(-8.43)S(8.43)GPPAQPK	3	2	0.094637	0	1159300	0	0	4167500	2546100	0	0	0	789780	743310	661250	0	0	0	0	0	0	170	170	1666;2181	1811;2399	23630;23631;23632;23633;23634;23635	23843;23844	23631	23844	Service_Sonenberg_150119_6
A6H619	1201	A6H619	A6H619	PHD and RING finger domain-containing protein 1	Phrf1		1	69.7133	2.33038e-09	101.39	78.034	101.39	1	S	KRAHSPEKKGPVREVSPAPATQGESRQDGDH	X;X;X;X;X;X;X;X;X;X;X;X;X;X;X;Phospho (STY);X;X;X;X;X;X;X;X;X;X;X;X;X;X;X	XXXXXXXXXPPPPPPPPPPPPPPPPPXXXXX	EVS(1)PAPATQGESR	EVS(69.71)PAPAT(-69.71)QGES(-91.03)R	3	2	-0.29715	6775900	1830100	5428000	5298500	3270400	3295400	8181300	1959400	5013600	6171800	6419900	3399400	7546800	6335900	4789600	0	5920800	3121600	1201	1201	774;977	844;1056	10913;10914;10915;10916;10917;10918;10919;10920;10921;10922;10923;10924;10925;10926;10927;10928;10929;10930;10931;13434;13435;13436;13437;13438;13439;13440;13441;13442	11671;11672;11673;11674;11675;11676;11677;11678;11679;11680;11681;11682;11683;11684;11685;11686;11687;11688;11689;11690;11691;11692;11693;11694;11695;11696;11697;11698;11699;11700;11701;11702;11703;11704;11705;11706;13802;13803;13804;13805;13806;13807	10920	11686	Service_Sonenberg_150119_8
A6H8H2	1041	A6H8H2	A6H8H2	DENN domain-containing protein 4C	Dennd4c		0.782473	5.61147	0.00242026	81.191	63.205	57.047	1	S	NGDRGEKKQKHFPERSCSFSSESRAGMLLKK	X;X;X;X;X;X;X;X;X;X;X;X;X;X;X;Phospho (STY);X;X;X;X;X;X;X;X;X;X;X;X;X;X;X	XXXXXXXXXXXXXXXPPPPPPPPPXXXXXXX	S(0.782)CS(0.215)FS(0.002)SESR	S(5.61)CS(-5.61)FS(-25.76)S(-32.58)ES(-40.13)R	1	2	0.27265	7074100	2558100	0	9630600	0	0	0	2692200	0	9073100	0	0	0	5821200	4432900	11196000	11023000	0	1041	1041	2417	2657	34812;34813;34815;34820;34824;34825;34826;34828;34829	34686;34687;34688;34690;34691;34699;34700;34701;34708;34709;34710;34711;34712;34713;34714	34815	34691	Service_Sonenberg_150119_4
A6H8H2	1043	A6H8H2	A6H8H2	DENN domain-containing protein 4C	Dennd4c		0.969851	15.1162	0.002996	83.869	70.29	77.662	1	S	DRGEKKQKHFPERSCSFSSESRAGMLLKKSS	X;X;X;X;X;X;X;X;X;X;X;X;X;X;X;Phospho (STY);X;X;X;X;X;X;X;X;X;X;X;X;X;X;X	XXXXXXXXXXXXXPPPPPPPPPXXXXXXXXX	S(0.03)CS(0.97)FSSESR	S(-15.12)CS(15.12)FS(-36.26)S(-42.97)ES(-49.46)R	3	2	0.18074	0	0	4748500	0	10320000	6771200	6925800	0	5419300	0	9574200	7532200	5991600	0	0	0	0	8680500	1043	1043	2417	2657	34814;34816;34817;34818;34819;34821;34822;34823;34827	34689;34692;34693;34694;34695;34696;34697;34698;34702;34703;34704;34705;34706;34707;34715;34716;34717	34822	34704	Service_Sonenberg_150119_12
A6H8H2	1635	A6H8H2	A6H8H2	DENN domain-containing protein 4C	Dennd4c		0.528643	0.498321	0.000235519	44.587	38.313	44.587	1	S	SVPNSLSKRNVSLTRSHSVGGPLQNIDFSQR	X;X;X;X;X;X;X;X;X;X;X;X;X;X;X;Phospho (STY);X;X;X;X;X;X;X;X;X;X;X;X;X;X;X	XXXXXXXXXXXXXXXPPPPPPPPPPPPPPPP	S(0.529)HS(0.471)VGGPLQNIDFSQR	S(0.5)HS(-0.5)VGGPLQNIDFS(-44.03)QR	1	3	-1.928	0	0	0	0	0	0	0	0	0	0	0	0	0	0	0	0	0	464470	1635	1635	2568	2827	36931	37025	36931	37025	Service_Sonenberg_150119_18
A6H8H2	1637	A6H8H2	A6H8H2	DENN domain-containing protein 4C	Dennd4c		0.820066	6.5883	0.000235519	44.587	39.957	44.587	1	S	PNSLSKRNVSLTRSHSVGGPLQNIDFSQRPF	X;X;X;X;X;X;X;X;X;X;X;X;X;X;X;Phospho (STY);X;X;X;X;X;X;X;X;X;X;X;X;X;X;X	XXXXXXXXXXXXXPPPPPPPPPPPPPPPPXX	S(0.18)HS(0.82)VGGPLQNIDFSQR	S(-6.59)HS(6.59)VGGPLQNIDFS(-43.28)QR	3	3	-0.45006	1951200	0	0	0	0	0	0	0	0	0	0	0	0	0	0	0	0	0	1637	1637	2568	2827	36930	37024	36930	37024	Service_Sonenberg_150119_1
A6H8H2	1272	A6H8H2	A6H8H2	DENN domain-containing protein 4C	Dennd4c		0.390736	0	6.26522e-05	61.409	42.166	61.409		S	QEPGSPAVFAHPLERSSSLPSDRGPPARDST	X;X;X;X;X;X;X;X;X;X;X;X;X;X;X;Phospho (STY);X;X;X;X;X;X;X;X;X;X;X;X;X;X;X	XXXXXXXXXXXXXXXPPPPPPPPPPPPPXXX	S(0.391)S(0.391)S(0.219)LPSDRGPPAR	S(0)S(0)S(-2.52)LPS(-44.29)DRGPPAR	1	3	-0.70208	0	0	0	0	0	0	0	0	0	0	0	0	0	0	0	0	0	0	1272	1272	2887;2888;2889	3178;3179;3180			41748	42385	Service_Sonenberg_150119_1
A6H8H2	1273	A6H8H2	A6H8H2	DENN domain-containing protein 4C	Dennd4c		0.390736	0	6.26522e-05	61.409	42.166	61.409		S	EPGSPAVFAHPLERSSSLPSDRGPPARDSTE	X;X;X;X;X;X;X;X;X;X;X;X;X;X;X;X;X;X;X;X;X;X;X;X;X;X;X;X;X;X;X	XXXXXXXXXXXXXXXXXXXXXXXXXXXXXXX	S(0.391)S(0.391)S(0.219)LPSDRGPPAR	S(0)S(0)S(-2.52)LPS(-44.29)DRGPPAR	2	3	-0.70208	0	0	0	0	0	0	0	0	0	0	0	0	0	0	0	0	0	0	1273	1273	2887;2888;2889	3178;3179;3180			41748	42385	Service_Sonenberg_150119_1
A6H8H2	1274	A6H8H2	A6H8H2	DENN domain-containing protein 4C	Dennd4c		0.969357	15.3854	1.8384e-05	81.632	70.419	81.632	1	S	PGSPAVFAHPLERSSSLPSDRGPPARDSTET	X;X;X;X;X;X;X;X;X;X;X;X;X;X;X;Phospho (STY);X;X;X;X;X;X;X;X;X;X;X;X;X;X;X	XXXXXXXXXXXXXPPPPPPPPPPPPPPPPPP	S(0.003)S(0.028)S(0.969)LPSDRGPPAR	S(-25.75)S(-15.39)S(15.39)LPS(-49.48)DRGPPAR	3	3	-0.91176	582600	4995300	9078300	21723000	21240000	17853000	16544000	6193300	13020000	50715000	32149000	31160000	13847000	10559000	10975000	26871000	40372000	28081000	1274	1274	2887;2888;2889	3178;3179;3180	41735;41736;41737;41738;41739;41740;41741;41742;41743;41744;41745;41746;41747;41750;41751;41752;41753;41754;41755;41757;41758;41759;41760;41761;41762;41763;41764;41766;41768;41769;41770;41771;41773;41774;41775;41776;41777;41778;41779;41780;41781;41782;41783;41784;41785	42380;42381;42382;42383;42384;42388;42389;42390;42391;42392;42393;42394;42395;42396;42397;42398;42399;42400;42401;42403;42404;42405;42406;42407;42408;42409;42410;42411;42412;42413;42414;42415;42416;42417;42418;42419;42420;42421;42422;42423;42424;42426;42427;42429;42430;42431;42432;42433;42434;42435;42436;42439;42440;42441;42442;42443;42444;42445;42446	41760	42412	Service_Sonenberg_150119_10
A6H8H2	1096	A6H8H2	A6H8H2	DENN domain-containing protein 4C	Dennd4c		0.87695	8.5292	1.50338e-06	58.848	51.227	52.823	1	S	LTCPKTSPPHVTRTHSFENVNCHLADSRTRM	X;X;X;X;X;Phospho (STY);Phospho (STY);X;X;X;X;X;X;X;X;Phospho (STY);X;X;X;X;Deamidation (NQ);X;X;X;X;X;X;X;X;X;X	XXXXXXXXXXXXXPPPPPPPPPPPPPPPXXX	T(0.123)HS(0.877)FENVNCHLADSR	T(-8.53)HS(8.53)FENVNCHLADS(-50.75)R	3	3	-0.43683	12418000	0	0	0	21748000	17291000	0	0	10817000	46654000	0	23924000	7408700	5363500	9063900	0	0	0	1096	1096	3088	3396;3397	44680;44681;44682;44683;44684;44685;44687;44688;44689;44700;44702;44703	45600;45601;45602;45603;45604;45605;45606;45608;45609;45610;45611;45612;45613;45615;45616	44683	45603	Service_Sonenberg_150119_9
A6H8H2	1087	A6H8H2	A6H8H2	DENN domain-containing protein 4C	Dennd4c		0.577926	1.36585	0.016615	57.96	47.546	42.395	1	S	ADAKILTAALTCPKTSPPHVTRTHSFENVNC	X;X;X;X;X;X;X;X;X;X;X;X;X;X;X;Phospho (STY);X;X;X;X;X;X;Phospho (STY);X;Phospho (STY);X;X;X;X;Deamidation (NQ);X	XXXXXXXXXXXXXXPPPPPPPPXXXXXXXXX	T(0.422)S(0.578)PPHVTR	T(-1.37)S(1.37)PPHVT(-37.7)R	2	2	0.011821	7070300	2116600	6813400	4883400	5122800	3366600	10517000	3009600	6417700	0	7401500	5972800	7242500	8882300	6087800	3239700	7531100	4723400	1087	1087	3196	3515	46281;46282;46283;46284;46285;46286;46287;46288;46289;46290;46291;46292;46293;46294;46295;46296;46297;46298;46299;46300;46301;46302;46303;46304;46305;46306;46307;46308;46309;46310;46311	47032;47033;47034;47035;47036;47037;47038;47039;47040;47041;47042	46283	47034	Service_Sonenberg_150119_6
A6X8Z5	1239	A6X8Z5	A6X8Z5	Rho GTPase-activating protein 31	Arhgap31		0.655808	5.82106	1.05819e-09	46.149	38.703	46.149	1	S	TPEIPQKSTKDDSPSSLGSPEEEQPKQETGA	X;X;X;X;X;X;X;X;X;X;X;X;X;X;X;Phospho (STY);X;X;X;X;X;X;X;X;X;X;X;X;X;X;X	XXXXXXXXXXPPPPPPPPPPPPPPPPPPPPP	DDS(0.013)PS(0.158)S(0.656)LGS(0.172)PEEEQPKQETGASASRR	DDS(-16.88)PS(-6.18)S(5.82)LGS(-5.82)PEEEQPKQET(-32.41)GAS(-32.41)AS(-32.41)RR	6	3	0.14927	0	0	0	0	0	0	0	0	0	1649100	0	0	0	0	0	0	0	0	1239	1239	406	446	5873	7156	5873	7156	Service_Sonenberg_150119_10
A6X8Z5	1242	A6X8Z5	A6X8Z5	Rho GTPase-activating protein 31	Arhgap31		0.976404	18.7105	6.32171e-10	48.088	40.812	48.088	1	S	IPQKSTKDDSPSSLGSPEEEQPKQETGASAS	X;X;X;X;X;X;X;X;X;X;X;X;X;X;X;Phospho (STY);X;X;X;X;X;X;X;X;X;X;X;X;X;X;X	XXXXXXXPPPPPPPPPPPPPPPPPPPPPPPP	DDS(0.005)PS(0.005)S(0.013)LGS(0.976)PEEEQPKQETGASASRR	DDS(-23.07)PS(-23.26)S(-18.71)LGS(18.71)PEEEQPKQET(-34.56)GAS(-34.56)AS(-34.56)RR	9	3	0.35142	951970	648070	0	0	0	1182800	647610	539910	792330	0	1658100	0	645840	0	535000	0	0	0	1242	1242	406	446	5872;5874;5875;5876;5877;5878;5879;5880;5881	7155	5872	7155	Service_Sonenberg_150119_6
A6X8Z5	1092	A6X8Z5	A6X8Z5	Rho GTPase-activating protein 31	Arhgap31		0.497133	0	4.71825e-06	53.773	47.045	53.773		S	LKNTECGPSKGKHRPSSLNLDSATPIADLFR	X;X;X;X;X;X;X;X;X;X;X;X;X;X;X;Phospho (STY);X;X;X;X;X;X;X;X;X;X;X;X;X;X;X	XXXXXXXXXXXXPPPPPPPPPPPPPPPPPPP	HRPS(0.497)S(0.497)LNLDS(0.005)AT(0.001)PIADLFR	HRPS(0)S(0)LNLDS(-19.94)AT(-28.58)PIADLFR	4	3	-1.0391	0	0	0	0	0	0	0	0	0	0	0	0	0	0	0	0	0	0	1092	1092	1128	1224			15614	15996	Service_Sonenberg_150119_3
A6X8Z5	1093	A6X8Z5	A6X8Z5	Rho GTPase-activating protein 31	Arhgap31		0.497133	0	4.71825e-06	53.773	47.045	53.773		S	KNTECGPSKGKHRPSSLNLDSATPIADLFRL	X;X;X;X;X;X;X;X;X;X;X;X;X;X;X;X;X;X;X;X;X;X;X;X;X;X;X;X;X;X;X	XXXXXXXXXXXXXXXXXXXXXXXXXXXXXXX	HRPS(0.497)S(0.497)LNLDS(0.005)AT(0.001)PIADLFR	HRPS(0)S(0)LNLDS(-19.94)AT(-28.58)PIADLFR	5	3	-1.0391	0	0	0	0	0	0	0	0	0	0	0	0	0	0	0	0	0	0	1093	1093	1128	1224			15614	15996	Service_Sonenberg_150119_3
A6X8Z5	1163	A6X8Z5	A6X8Z5	Rho GTPase-activating protein 31	Arhgap31		0.999807	38.6717	0.000476129	63.185	50.143	63.185	1	S	QDLDIVAHTLTGRRNSAPVSVSAVRTSFMVK	X;X;X;X;X;X;X;X;X;X;X;X;X;X;X;Phospho (STY);X;X;X;X;X;X;X;X;X;X;X;X;X;X;X	XXXXXXXXXXXXXPPPPPPPPPPPPXXXXXX	RNS(1)APVSVSAVR	RNS(38.67)APVS(-38.67)VS(-42.45)AVR	3	2	-0.41394	445290	849390	0	0	0	597020	922360	605270	0	570900	323580	426340	453370	709800	524400	0	635750	378250	1163	1163	2194	2413	31233;31234;31235;31236;31237;31238;31239;31240;31241;31242;31243;31244;31245	30739;30740	31233	30739	Service_Sonenberg_150119_2
A6X919	46	A6X919	A6X919	Probable C-mannosyltransferase DPY19L1	Dpy19l1		0.999955	43.4617	0.00396261	56.916	47.166	56.916	1	S	SEVDAGELGSERTPPSPGRRGAAGRKGPRAG	X;X;X;X;X;X;X;X;X;X;X;X;X;X;X;Phospho (STY);X;X;X;X;X;X;X;X;X;X;X;X;X;X;X	XXXXXXXXXXXXPPPPPPPPXXXXXXXXXXX	TPPS(1)PGRR	T(-43.46)PPS(43.46)PGRR	4	2	0.59737	0	0	0	5533900	1466900	2881100	0	0	4380800	13727000	4219500	2227900	0	7426100	3921900	0	0	0	46	46	3151	3467	45517;45518;45519;45520;45521;45522;45523;45524;45525	46260;46261;46262;46263;46264;46265;46266;46267	45522	46265	Service_Sonenberg_150119_12
B1AVH7	914	B1AVH7	B1AVH7	TBC1 domain family member 2A	Tbc1d2		0.999795	36.8888	1.06482e-07	60.345	53.961	60.345	1	S	QRRASLGRAPPEGCVSEDEGEGDS_______	X;X;X;X;X;X;X;X;X;X;X;X;X;X;X;Phospho (STY);X;X;X;X;X;X;X;X;X;X;X;X;X;X;X	XXXXXXXXPPPPPPPPPPPPPPPPXXXXXXX	APPEGCVS(1)EDEGEGDS	APPEGCVS(36.89)EDEGEGDS(-36.89)	8	2	0.24432	0	687470	0	0	0	0	4608900	1405800	3486800	3396100	0	0	0	0	0	2364100	3033200	1840600	914	914	209	228	3049;3050;3051;3052;3053;3054;3055;3056	3086;3087;3088;3089;3090;3091	3049	3086	Service_Sonenberg_150119_10
B1AXH1	435	B1AXH1	B1AXH1	NHS-like protein 2	Nhsl2		0.950682	12.8503	0.000825895	58.511	48.558	58.511	1	S	MSISIRSKTKVSRHHSDTNFGVKLAQKTSPN	X;X;X;X;X;X;X;X;X;X;X;X;X;X;X;Phospho (STY);X;X;X;X;X;X;X;X;X;X;X;X;X;X;X	XXXXXXXXXXXXXPPPPPPPPPPXXXXXXXX	HHS(0.951)DT(0.049)NFGVK	HHS(12.85)DT(-12.85)NFGVK	3	3	0.3041	261640	731770	0	0	1101800	0	0	561850	0	0	0	0	0	0	0	0	0	0	435	435	1094	1183	15083;15084;15085;15086	15516;15517;15518	15083	15517	Service_Sonenberg_150119_2
B1AY13	1940	B1AY13	B1AY13	Ubiquitin carboxyl-terminal hydrolase 24	Usp24		1	122.344	4.55999e-08	127.17	117.04	122.34	1	S	EVGENGRNMDQGGGGSPRKKVALTENYELVG	X;X;X;X;X;X;X;X;X;X;X;X;X;X;X;Phospho (STY);X;X;X;X;X;X;X;X;X;X;X;X;X;X;X	XXXXXXXPPPPPPPPPPPXXXXXXXXXXXXX	NMDQGGGGS(1)PR	NMDQGGGGS(122.34)PR	9	2	-0.51601	4539900	1136100	0	5497000	1940100	1207300	4150400	703950	2559400	2986800	1785900	1210100	1159400	2771300	1458300	3470500	4209700	1356500	1940	1940	1834	2012	26099;26100;26101;26102;26103;26104;26105;26106;26107;26108;26109;26110;26111;26112;26113;26114;26115;26116	25928;25929;25930;25931;25932;25933;25934;25935;25936;25937;25938;25939;25940;25941;25942;25943;25944;25945;25946;25947;25948;25949	26113	25949	Service_Sonenberg_150119_17
B1AY13	1282	B1AY13	B1AY13	Ubiquitin carboxyl-terminal hydrolase 24	Usp24		0.999625	34.2614	0.00387448	50.791	32.883	50.791	1	S	SRPFRNVSRQTSRQMSLCGTPEKSSYRQLSV	X;X;X;X;X;X;X;X;X;X;X;X;X;X;X;Phospho (STY);X;X;X;X;X;X;X;X;X;X;X;X;X;X;X	XXXXXXXXXXXXXPPPPPPPPPPXXXXXXXX	QMS(1)LCGTPEK	QMS(34.26)LCGT(-34.26)PEK	3	2	0.63589	0	0	0	0	0	171110	0	0	255820	0	425410	360970	0	0	0	340370	543110	363070	1282	1282	1981	2179	28233;28234;28235;28236;28237;28238;28239	27719	28233	27719	Service_Sonenberg_150119_12
B1AY13	1138	B1AY13	B1AY13	Ubiquitin carboxyl-terminal hydrolase 24	Usp24		0.974434	16.0051	0.0225558	50.127	23.592	48.756	1	S	RKKTLLSETSSQSSKSPSLSSKQQHQPSASS	X;X;X;X;X;X;X;X;X;X;X;X;X;X;X;Phospho (STY);X;X;X;X;X;X;X;X;X;X;X;X;X;X;X	XXXXXXXXXXXXXXXPPPPPPPXXXXXXXXX	S(0.974)PS(0.024)LS(0.001)SK	S(16.01)PS(-16.01)LS(-30.49)S(-35.94)K	1	2	0.20047	1883400	1487300	0	0	0	0	0	0	1462100	1417100	0	968240	0	1674500	1168700	0	0	1129600	1138	1138	2723	2996	39143;39144;39145;39146;39147;39148;39149;39150	39318;39319;39320;39321;39322;39323	39143	39319	Service_Sonenberg_150119_9
B1AY13	2044	B1AY13	B1AY13	Ubiquitin carboxyl-terminal hydrolase 24	Usp24		0.999998	57.4954	1.25356e-10	118.73	108.77	118.73	1	S	WNAYMLFYQRVSDQNSPVLPKKSRVSVVRQE	X;X;X;X;X;X;X;X;X;X;X;X;X;X;X;Phospho (STY);X;X;X;X;X;X;X;X;X;X;X;X;X;X;X	XXXXXXXXXXPPPPPPPPPPPPXXXXXXXXX	VSDQNS(1)PVLPKK	VS(-57.5)DQNS(57.5)PVLPKK	6	2	-0.89777	12122000	6137900	9711400	0	8120200	8243500	13864000	6212900	8845900	12499000	7698300	0	0	0	0	0	0	8740400	2044	2044	3375;3376	3710;3711	48799;48800;48801;48802;48803;48804;48805;48806;48807;48808;48809;48810;48811;48812;48813;48814;48815;48816;48817	49140;49141;49142;49143;49144;49145;49146;49147;49148;49149;49150;49151;49152;49153;49154;49155;49156;49157;49158;49159;49160;49161;49162;49163	48811	49157	Service_Sonenberg_150119_7
B1AZA5	12	B1AZA5	B1AZA5	Transmembrane protein 245	Tmem245		1	66.0588	5.77019e-05	66.059	45.596	66.059	1	S	____MADRGGPAEAPSPRGSPRPESRAPRTV	X;X;X;X;X;X;X;X;X;X;X;X;X;X;X;Phospho (STY);X;X;X;X;X;X;X;X;X;X;X;X;X;X;X	XXXXXPPPPPPPPPPPPPXXXXXXXXXXXXX	ADRGGPAEAPS(1)PR	ADRGGPAEAPS(66.06)PR	11	2	-0.22273	1447500	363820	1022600	0	0	795300	1930500	483780	1327800	1508900	1666200	1207200	2160900	2033100	1575900	1385400	1913600	1517700	12	12	51	54	582;583;584;585;586;587;588;589;590;591;592;593;594;595;596;597	581;582;583;584;585;586;587;588;589;590;591;592	591	592	Service_Sonenberg_150119_18
B1AZA5	327	B1AZA5	B1AZA5	Transmembrane protein 245	Tmem245		0.9866	20.0427	3.23475e-07	101.72	69.103	101.72	1	S	ALSASSSSSSRSSPSSPSPTLGRQRPEMGTF	X;X;X;X;X;X;X;X;X;X;X;X;X;X;X;Phospho (STY);X;X;X;X;X;X;X;X;X;X;X;X;X;X;X	XXXXXXXXXXXPPPPPPPPPPPPXXXXXXXX	S(0.002)S(0.002)PS(0.01)S(0.987)PS(0.001)PTLGR	S(-28.09)S(-28.09)PS(-20.04)S(20.04)PS(-32.49)PT(-50.11)LGR	5	2	0.21324	477530	0	436080	2189300	1648100	0	828190	0	771000	732810	403850	277600	0	471760	153750	438520	690630	364190	327	327	2872	3162	41469;41470;41472;41474;41476;41478;41480;41482;41484;41487;41489;41490;41492;41493	42052;42053;42054	41470	42054	Service_Sonenberg_150119_5
B1AZP2	716	B1AZP2	B1AZP2	Disks large-associated protein 4	Dlgap4		0.992777	22.7999	1.08199e-155	176.28	163.11	151.39	1	S	SSAPSHSMSSRRDTDSDTQDANDSSCKSSER	X;X;X;X;X;X;X;X;X;X;X;X;X;X;X;Phospho (STY);X;X;X;X;X;X;X;X;X;X;X;X;X;X;X	XXXXXXXXXXXPPPPPPPPPPPPPPPPXXXX	RDT(0.005)DS(0.993)DT(0.002)QDANDSSCK	RDT(-22.8)DS(22.8)DT(-26.93)QDANDS(-83.03)S(-89.57)CK	5	2	-0.86204	2359100	0	0	0	0	0	2659300	588880	0	0	1734900	0	1281000	1253800	0	0	0	0	716	716	528;2068	576;2273	29365;29367;29370;29371;29374;29376;29377	28755;28756;28758;28761;28762;28763;28767;28768;28771;28772;28773	29376	28771	Service_Sonenberg_150119_13
B1AZP2	728	B1AZP2	B1AZP2	Disks large-associated protein 4	Dlgap4		0.650653	4.94168	5.24913e-05	41.446	32.626	41.446	1	S	DTDSDTQDANDSSCKSSERSLPDCTSHPNSI	X;Phospho (STY);X;Phospho (STY);X;Phospho (STY);X;X;X;X;X;X;X;X;X;Phospho (STY);X;X;X;X;X;X;X;X;X;X;X;X;X;X;X	PPPPPPPPPPPPPPPPPPPXXXXXXXXXXXX	DTDSDT(0.001)QDANDS(0.038)S(0.101)CKS(0.651)S(0.209)ER	DT(-33.06)DS(-31.38)DT(-28.56)QDANDS(-12.29)S(-8.1)CKS(4.94)S(-4.94)ER	16	3	-0.59184	0	0	0	0	0	0	0	0	0	0	0	0	0	0	0	0	0	0	728	728	528	576	7421;7422	8257;8258	7421	8257	Service_Sonenberg_150119_11
B2RQC2	936	B2RQC2	B2RQC2	Ubiquitin carboxyl-terminal hydrolase 42	Usp42		1	43.8967	0.0117602	43.897	17.792	43.897	1	S	DRGDGGHVGPKAQEPSPAKEKMSSLRKVDRG	X;X;X;X;X;X;X;X;X;X;X;X;X;X;X;Phospho (STY);X;X;X;X;X;X;X;X;X;X;X;X;X;X;X	XXXXXXXXXXXPPPPPPPPPPXXXXXXXXXX	AQEPS(1)PAKEK	AQEPS(43.9)PAKEK	5	2	-0.48615	0	725220	0	0	0	0	1346800	444470	0	0	764040	450120	0	1365100	0	696330	856610	595450	936	936	225	245	3293;3294;3295;3296;3297;3298;3299;3300;3301	3509;3510	3294	3510	Service_Sonenberg_150119_18
B2RQC6	1859	B2RQC6	B2RQC6	CAD protein;Glutamine-dependent carbamoyl-phosphate synthase;Aspartate carbamoyltransferase;Dihydroorotase	Cad		1	50.0792	0.000201367	50.079	31.004	50.079	1	S	LPDGRFHLPPRIHRASDPGLPAEEPKEKPPR	X;X;X;X;X;X;X;X;X;X;X;X;X;X;X;Phospho (STY);X;X;X;X;X;X;X;X;X;X;X;X;X;X;X	XXXXXXXXXXXPPPPPPPPPPPPPPPXXXXX	IHRAS(1)DPGLPAEEPK	IHRAS(50.08)DPGLPAEEPK	5	2	0.45086	1330600	668500	0	0	0	1236200	3240900	0	0	0	0	1779900	1943600	2932100	2034700	1055700	3266100	0	1859	1859	1210	1315	16954;16955;16956;16957;16958;16959;16960;16961;16962;16963;16964	17476;17477	16955	17477	Service_Sonenberg_150119_7
B2RR83	1104	B2RR83	B2RR83	Probable ATP-dependent RNA helicase YTHDC2	Ythdc2		0.48019	0	0.000574381	41.378	31.373	41.378		S	LQEPSSFRADGIPNDSSDSEMEDRTTANLAA	X;X;X;X;X;X;X;X;X;X;X;X;X;X;X;Phospho (STY);X;X;X;X;X;X;X;X;X;X;X;X;X;X;X	XXXXXXXXPPPPPPPPPPPPPPPPXXXXXXX	ADGIPNDS(0.48)S(0.48)DS(0.04)EMEDR	ADGIPNDS(0)S(0)DS(-10.83)EMEDR	8	2	0.93969	0	0	0	0	0	0	0	0	0	0	0	0	0	0	0	0	0	0	1104	1104	39	42			471	486	Service_Sonenberg_150119_13
B2RR83	1105	B2RR83	B2RR83	Probable ATP-dependent RNA helicase YTHDC2	Ythdc2		0.70527	6.7996	0.000365117	48.177	36.385	48.177	1	S	QEPSSFRADGIPNDSSDSEMEDRTTANLAAL	X;X;X;X;X;X;X;X;X;X;X;X;X;X;X;Phospho (STY);X;X;X;X;X;X;X;X;X;X;X;X;X;X;X	XXXXXXXPPPPPPPPPPPPPPPPXXXXXXXX	ADGIPNDS(0.147)S(0.705)DS(0.147)EMEDR	ADGIPNDS(-6.8)S(6.8)DS(-6.8)EMEDR	9	2	1.4709	712240	296760	0	0	0	532280	1393500	321390	658270	606800	620890	650790	0	487230	535170	0	907190	622690	1105	1105	39	42	470;472;473;474;475;476;477;478;479;480;481;482;483	485	470	485	Service_Sonenberg_150119_10
B2RUJ5	571	B2RUJ5	B2RUJ5	Amyloid beta A4 precursor protein-binding family A member 1	Apba1		0.610583	1.95333	5.53277e-22	97.235	81.053	81.346	1	S	IGNIVVLMARRRMPRSNSQENVEASHPSQDG	X;X;X;X;X;X;X;X;X;X;X;X;X;X;X;Phospho (STY);X;X;X;X;X;X;X;X;X;X;X;X;X;X;X	XXXXXXXXXXXXXXXPPPPPPPPPPPPPPPP	S(0.611)NS(0.389)QENVEASHPSQDGKR	S(1.95)NS(-1.95)QENVEAS(-53.18)HPS(-75.12)QDGKR	1	3	0.34196	8499900	10092000	14382000	10564000	6977800	0	7718000	4863200	9520000	9267800	5043500	0	6222800	9208100	0	7069900	0	5149800	571	571	2694	2966	38743;38744;38745;38747;38748;38751;38752;38753;38754;38756;38757;38758;38759;38761;38762;38763;38764;38766;38768;38770;38772	38967;38968;38969;38971;38972;38973;38974;38975;38979;38980;38981;38982;38983;38985;38986;38987;38988;38989;38990;38993;38994;38995;38996;38997;38998;38999;39001;39002;39005;39007;39008	38754	38983	Service_Sonenberg_150119_8
B2RUJ5	573	B2RUJ5	B2RUJ5	Amyloid beta A4 precursor protein-binding family A member 1	Apba1		0.842179	7.27411	1.90864e-41	113.28	95.908	70.121	1	S	NIVVLMARRRMPRSNSQENVEASHPSQDGKR	X;X;X;X;X;X;X;X;X;X;X;X;X;X;X;Phospho (STY);X;X;X;X;X;X;X;X;X;X;X;X;X;X;X	XXXXXXXXXXXXXPPPPPPPPPPPPPPPPPP	S(0.158)NS(0.842)QENVEASHPSQDGKR	S(-7.27)NS(7.27)QENVEAS(-41.49)HPS(-56.79)QDGKR	3	3	0.29602	0	0	0	0	6977800	8171300	0	0	0	0	0	5509800	0	0	4377700	0	0	0	573	573	2694	2966	38748;38750;38755;38760;38765;38767;38768;38769	38973;38974;38975;38977;38978;38984;38991;38992;39000;39003;39004;39005;39006	38765	39000	Service_Sonenberg_150119_15
B2RUP2	149	B2RUP2	B2RUP2	Protein unc-13 homolog D	Unc13d		0.996927	25.1117	4.09018e-07	107.85	88.604	100.93	1	S	YCLLGIEQKVGVAEGSPVSRRRQKAVVKHTI	X;X;X;X;X;X;X;X;X;X;X;X;X;X;X;Phospho (STY);X;X;X;X;X;X;X;X;X;X;X;X;X;X;X	XXXXXXXXXPPPPPPPPPPPPXXXXXXXXXX	VGVAEGS(0.997)PVS(0.003)R	VGVAEGS(25.11)PVS(-25.11)R	7	2	-0.49278	25783000	16156000	19949000	14440000	11838000	15838000	26032000	14148000	17625000	23567000	19317000	0	29257000	23048000	19463000	16157000	20209000	14675000	149	149	3311;3312	3641;3642	47935;47936;47937;47938;47939;47940;47941;47942;47943;47944;47945;47946;47947;47948;47949;47950;47951;47952;47953;47954;47955	48481;48482;48483;48484;48485;48486;48487;48488;48489;48490;48491;48492;48493;48494;48495;48496;48497;48498;48499;48500;48501;48502;48503;48504;48505;48506;48507;48508;48509;48510;48511;48512;48513;48514;48515;48516;48517;48518;48519;48520;48521;48522;48523	47948	48516	Service_Sonenberg_150119_16
B2RWS6	1036	B2RWS6	B2RWS6	Histone acetyltransferase p300	Ep300		0.423332	1.0342	7.14615e-10	55.051	46.375	55.051		S	DGKEEEEQPSTSATQSSPAPGQSKKKIFKPE	X;X;X;X;X;X;X;X;X;X;X;X;X;X;X;Phospho (STY);X;X;X;X;X;X;X;X;X;X;X;X;X;X;X	PPPPPPPPPPPPPPPPPPPPPPPPXXXXXXX	TDGKEEEEQPS(0.038)T(0.038)S(0.038)AT(0.125)QS(0.423)S(0.334)PAPGQS(0.003)K	T(-41.24)DGKEEEEQPS(-10.43)T(-10.43)S(-10.43)AT(-5.29)QS(1.03)S(-1.03)PAPGQS(-22.23)K	17	3	0.86772	0	0	0	0	0	0	0	0	0	0	0	0	0	0	0	0	0	0	1036	1036	3048	3354			44110	45005	Service_Sonenberg_150119_8
B2RWS6	1037	B2RWS6	B2RWS6	Histone acetyltransferase p300	Ep300		0.480276	1.51633	7.44976e-08	48.773	40.781	47.919		S	GKEEEEQPSTSATQSSPAPGQSKKKIFKPEE	X;X;X;X;X;X;X;X;X;X;X;X;X;X;X;Phospho (STY);X;X;X;X;X;X;X;X;X;X;X;X;X;X;X	PPPPPPPPPPPPPPPPPPPPPPPXXXXXXXX	TDGKEEEEQPS(0.026)T(0.026)S(0.026)AT(0.091)QS(0.339)S(0.48)PAPGQS(0.013)K	T(-33.87)DGKEEEEQPS(-12.74)T(-12.74)S(-12.74)AT(-7.24)QS(-1.52)S(1.52)PAPGQS(-15.55)K	18	3	0.67803	0	0	0	0	0	0	0	0	0	0	0	0	0	0	0	0	0	0	1037	1037	3048	3354			44111	45006	Service_Sonenberg_150119_9
B2RY56	670	B2RY56	B2RY56	RNA-binding protein 25	Rbm25		0.5	0	1.23384e-06	74.475	63.002	74.475	1	S	EEHRPKIGLSLKLGASNSPGQPNSVKRKKLP	X;X;X;X;X;X;X;X;X;X;X;X;X;X;X;Phospho (STY);X;X;X;X;X;X;X;X;X;X;X;X;X;X;X	XXXXXXXXXXXXPPPPPPPPPPPPPPPXXXX	LGAS(0.5)NS(0.5)PGQPNSVKR	LGAS(0)NS(0)PGQPNS(-66.18)VKR	4	3	0.35518	17766000	8687300	20946000	0	0	8776300	17711000	7342600	9367100	8792600	15461000	8953200	13434000	19494000	8979100	6031900	8879400	0	670	670	1571;1572	1708;1709;1710	22435;22448;22451;22467;22468;22469;22470;22471;22472;22473;22474;22475;22476;22477;22478;22479	22857;22858;22859;22875;22881	22448	22875	Service_Sonenberg_150119_2
B2RY56	672	B2RY56	B2RY56	RNA-binding protein 25	Rbm25		0.999857	38.4506	3.77901e-120	171.08	155.69	141.59	1	S	HRPKIGLSLKLGASNSPGQPNSVKRKKLPVD	X;X;X;X;X;X;X;X;X;X;X;X;X;X;X;Phospho (STY);X;X;X;X;Deamidation (NQ);X;X;X;X;X;X;X;X;X;X	XXXXXXXXXXPPPPPPPPPPPPPPPXXXXXX	LGASNS(1)PGQPNSVKR	LGAS(-38.45)NS(38.45)PGQPNS(-97.34)VKR	6	2	0.38458	10483000	4601700	16647000	6479000	3975400	5926100	12889000	4707900	4936000	5033900	10668000	5545700	9487200	13191000	5761800	3628500	6389300	1535500	672	672	1571;1572	1708;1709;1710	22421;22422;22423;22424;22425;22426;22427;22428;22429;22430;22431;22432;22434;22435;22436;22437;22438;22439;22440;22441;22442;22443;22444;22445;22446;22447;22448;22449;22450;22451;22452;22453;22454;22455;22456;22457;22458;22459;22460;22461;22462;22463;22464;22465;22466;22467;22468;22469;22470;22471;22472;22473;22474;22475;22476;22477;22478;22479	22824;22825;22826;22827;22828;22829;22830;22831;22832;22833;22834;22835;22836;22837;22838;22839;22840;22841;22842;22843;22844;22845;22846;22847;22848;22849;22850;22851;22854;22855;22856;22857;22858;22859;22860;22861;22862;22863;22864;22865;22866;22867;22868;22869;22870;22871;22872;22873;22874;22875;22876;22877;22878;22879;22880;22881;22882;22883;22884;22885;22886;22887;22888;22889;22890;22891;228…	22457	22899	Service_Sonenberg_150119_9
CON__P01045-1;CON__Q2KJ62;CON__P01044-1	329;331;331	CON__P01045-1	CON__P01045-1				0.999838	39.9431	5.9071e-89	164.66	147.18	160.87	1	S	YSIVFIARETTCSKGSNEELTKSCEINIHGQ	X;X;X;X;X;X;X;X;X;X;X;X;X;X;X;Phospho (STY);X;X;X;X;X;X;X;X;X;X;X;X;X;X;X	XXXXXXXXPPPPPPPPPPPPPPXXXXXXXXX	ETTCSKGS(1)NEELTK	ET(-55.96)T(-42.35)CS(-39.94)KGS(39.94)NEELT(-83.66)K	8	2	0.59455	10349000	0	8097100	6643300	8390400	7543100	12726000	8925100	0	10621000	0	4836100	10080000	0	5973700	3695300	9248900	6945100	329	329	760	829	10700;10702;10703;10704;10705;10706;10707;10709;10710;10711;10712;10713;10714;10715	11421;11422;11426;11427;11428;11429;11430;11431;11432;11433;11434;11435;11436;11437;11438;11439;11440;11441;11444;11445;11446;11447;11448;11449;11450;11451;11452;11453;11454;11455;11456;11457	10715	11455	Service_Sonenberg_150119_18
CON__P12763	135	CON__P12763	CON__P12763				0.940669	13.541	5.07293e-27	105.25	81.528	96.745	1	S	KQDGQFSVLFTKCDSSPDSAEDVRKLCPDCP	X;X;X;X;X;X;X;X;X;X;X;X;X;X;X;Phospho (STY);X;X;X;X;X;X;X;X;X;X;X;X;X;X;X	XXXXXXXXXXXXPPPPPPPPPPPPXXXXXXX	CDS(0.018)S(0.941)PDS(0.042)AEDVR	CDS(-17.25)S(13.54)PDS(-13.54)AEDVR	4	2	0.005093	0	37628000	0	192720000	0	0	0	0	0	0	0	0	0	0	0	0	0	0	135	135	363;364	398;400	5236;5243;5249	6351;6352;6353;6354;6355;6356;6357;6358;6359;6360;6361;6362;6363;6364;6365;6366;6367;6368;6369;6370;6371;6372;6373;6374;6375;6376;6377;6378;6379;6389;6407;6408;6409;6410;6411;6412;6413;6414	5236	6353	Service_Sonenberg_150119_2
CON__P12763	138	CON__P12763	CON__P12763				1	63.3639	9.47383e-83	143.42	112.6	109.84	1	S	GQFSVLFTKCDSSPDSAEDVRKLCPDCPLLA	X;X;X;X;X;X;X;X;X;X;X;X;X;X;X;Phospho (STY);X;X;X;X;X;X;X;X;X;X;X;X;X;X;X	XXXXXXXXXPPPPPPPPPPPPPXXXXXXXXX	CDSSPDS(1)AEDVRK	CDS(-78.32)S(-63.36)PDS(63.36)AEDVRK	7	2	-0.030656	1097900000	252850000	486040000	1409300	881360000	1123000000	1435900000	651590000	511170000	884150000	1457500000	601450000	904100000	1021100000	652700000	430710000	1001600000	599450000	138	138	363;364	398;400	5234;5235;5237;5238;5239;5240;5241;5242;5244;5245;5246;5247;5248;5250;5251;5252;5253;5254;5255;5256;5257;5258;5259;5260;5261;5262;5263;5264;5265;5266;5267;5268;5297;5298;5299;5300;5301;5302;5303;5304;5305;5306;5307;5308;5309;5310;5311;5312;5313;5314;5315;5316;5317;5318;5319;5320;5321;5322;5323;5324;5325;5326;5327;5328;5329;5330;5331;5332;5333;5334;5335;5336;5337;5338;5339;5340;5341;5342;5343;5344…	6340;6341;6342;6343;6344;6345;6346;6347;6348;6349;6350;6380;6381;6382;6383;6384;6385;6386;6387;6388;6390;6391;6392;6393;6394;6395;6396;6397;6398;6399;6400;6401;6402;6403;6404;6405;6406;6415;6416;6417;6418;6419;6420;6421;6422;6423;6424;6425;6426;6427;6428;6429;6430;6431;6432;6433;6434;6435;6436;6437;6438;6439;6440;6441;6442;6443;6444;6445;6446;6447;6448;6449;6450;6451;6452;6453;6454;6455;6456;6457…	5319	6662	Service_Sonenberg_150119_6
CON__P12763	320	CON__P12763	CON__P12763				0.88999	11.8929	4.53021e-06	52.321	40.241	52.321	2	S	HRAHYDLRHTFSGVASVESSSGEAFHVGKTP	X;X;X;X;X;X;X;X;X;X;X;X;X;X;X;Phospho (STY);X;X;Phospho (STY);X;X;X;X;X;X;X;X;X;X;X;X	XXXXXXXXPPPPPPPPPPPPPPPPPPPPPXX	HT(0.012)FS(0.062)GVAS(0.89)VES(0.447)S(0.334)S(0.254)GEAFHVGK	HT(-19.06)FS(-11.89)GVAS(11.89)VES(1.38)S(-1.38)S(-2.7)GEAFHVGK	8	3	0.032775	4308000	0	0	0	0	0	0	0	0	0	0	0	0	0	0	226830	0	0	320	320	1157	1258;1259	16144;16148	16547	16144	16547	Service_Sonenberg_150119_1
CON__P12763	323	CON__P12763	CON__P12763				0.64959	0	4.81826e-20	71.806	54.09	71.806	1;2	S	HYDLRHTFSGVASVESSSGEAFHVGKTPIVG	X;X;X;X;X;X;X;X;X;X;X;X;Phospho (STY);X;X;Phospho (STY);Phospho (STY);X;X;X;X;X;X;X;X;X;X;X;X;X;X	XXXXXPPPPPPPPPPPPPPPPPPPPPXXXXX	HTFSGVAS(0.064)VES(0.65)S(0.645)S(0.641)GEAFHVGK	HT(-48.59)FS(-37.89)GVAS(-10.86)VES(0)S(0)S(0)GEAFHVGK	11	2	0.30989	8266400	125660000	4870200	0	0	0	477610	0	0	0	0	0	0	0	0	0	0	0	323	323	1157	1258;1259	16123;16128;16130;16134;16137;16145;16147	16528;16529;16530;16538;16539;16541;16542;16548;16549;16551;16552;16553;16554;16555	16147	16552	Service_Sonenberg_150119_7
CON__P12763	324	CON__P12763	CON__P12763				0.645003	0	4.81826e-20	71.806	54.09	71.806	2	S	YDLRHTFSGVASVESSSGEAFHVGKTPIVGQ	X;X;X;X;X;X;X;X;X;X;X;X;X;X;Phospho (STY);Phospho (STY);X;X;X;X;X;X;X;X;X;X;X;X;X;X;X	XXXXPPPPPPPPPPPPPPPPPPPPPXXXXXX	HTFSGVAS(0.064)VES(0.65)S(0.645)S(0.641)GEAFHVGK	HT(-48.59)FS(-37.89)GVAS(-10.86)VES(0)S(0)S(0)GEAFHVGK	12	2	0.30989	0	116110000	0	0	0	0	0	0	0	0	0	0	0	0	0	0	0	0	324	324	1157	1258;1259	16145;16147	16548;16549;16551;16552;16553;16554;16555	16147	16552	Service_Sonenberg_150119_7
CON__P12763	325	CON__P12763	CON__P12763				0.641297	0	4.81826e-20	71.806	54.09	71.806	2	S	DLRHTFSGVASVESSSGEAFHVGKTPIVGQP	X;X;X;X;X;X;X;X;X;X;X;X;X;X;X;X;X;X;X;X;X;X;X;X;X;X;X;X;X;X;X	XXXXXXXXXXXXXXXXXXXXXXXXXXXXXXX	HTFSGVAS(0.064)VES(0.65)S(0.645)S(0.641)GEAFHVGK	HT(-48.59)FS(-37.89)GVAS(-10.86)VES(0)S(0)S(0)GEAFHVGK	13	2	0.30989	0	116110000	0	0	0	0	0	0	0	0	0	0	0	0	0	0	0	0	325	325	1157	1258;1259	16145;16147	16548;16549;16551;16552;16553;16554;16555	16147	16552	Service_Sonenberg_150119_7
CON__P28800	481	CON__P28800	CON__P28800				0.994008	22.4488	6.76018e-05	52.887	38.468	52.887	1	S	RGDKPFDPDLKLGPPSEEDYAQPSSPK____	X;X;X;X;X;X;X;X;X;X;X;X;X;X;X;Phospho (STY);X;X;X;X;X;X;X;X;X;X;X;X;X;X;X	XXXXXXXXXXXPPPPPPPPPPPPPPPPXXXX	LGPPS(0.994)EEDY(0.006)AQPSSPK	LGPPS(22.45)EEDY(-22.45)AQPS(-35.81)S(-41.24)PK	5	2	0.686	0	1308400	317370	0	0	0	0	0	0	0	0	0	0	0	0	0	0	0	481	481	1579	1717	22570;22571	22949	22570	22949	Service_Sonenberg_150119_2
CON__P41361	69	CON__P41361	CON__P41361				0.753311	4.85263	7.36807e-05	41.597	25.582	41.597	1	S	CIYRSSEKKATEGQGSEQKIPGATNRRVWEL	X;X;X;X;X;X;X;X;X;X;X;X;X;X;X;Phospho (STY);X;X;X;X;X;X;X;X;X;X;X;X;X;X;X	XXXXXXXXPPPPPPPPPPPPPPPPPPXXXXX	KAT(0.246)EGQGS(0.753)EQKIPGATNR	KAT(-4.85)EGQGS(4.85)EQKIPGAT(-34.8)NR	8	3	-0.82174	1724300	0	0	0	0	604680	722820	652540	0	794420	0	0	0	0	0	494220	1788100	941360	69	69	1300	1410	18244;18245;18246;18247;18248;18249;18250;18251	18497	18244	18497	Service_Sonenberg_150119_1
CON__Q03247	146	CON__Q03247	CON__Q03247				0.839669	7.1912	3.12466e-06	62.377	47.687	62.377	1	S	RLAQYRSEVQAMLGQSTEELRARMASHLRKL	X;X;X;X;X;X;X;X;X;X;X;X;X;X;X;Phospho (STY);X;X;X;X;X;X;X;X;X;X;X;X;X;X;X	XXXXXXPPPPPPPPPPPPPPPXXXXXXXXXX	SEVQAMLGQS(0.84)T(0.16)EELR	S(-48.98)EVQAMLGQS(7.19)T(-7.19)EELR	10	2	2.1516	797660	926730	0	0	288480	440020	357670	388320	0	0	132380	159040	166980	164180	0	122300	0	0	146	146	2474	2717	35539;35540;35541;35542;35543;35544;35545;35546;35547;35548;35549	35483	35539	35483	Service_Sonenberg_150119_2
D3YXK2;Q80YR5	366;387	D3YXK2	D3YXK2	Scaffold attachment factor B1;Scaffold attachment factor B2	Safb;Safb2		0.999904	40.2296	2.01583e-16	114.7	91.329	114.7	1	S	EATSQELVRAPTAALSPEPQDSKEDVKKFAF	X;X;X;X;X;X;X;X;X;X;X;X;X;X;X;Phospho (STY);X;X;X;X;X;X;X;X;X;X;X;X;X;X;X	XXXXXXXXXPPPPPPPPPPPPPPPPPPPXXX	APTAALS(1)PEPQDSK	APT(-60.43)AALS(40.23)PEPQDS(-40.23)K	7	2	0.49078	5391000	1784300	3881400	3336300	3912200	3439600	4913100	2046500	0	5552800	5109100	3371400	4202300	0	3774800	2744000	6459800	3833600	366	366	219;220;221	238;239;240	3185;3186;3187;3188;3189;3190;3191;3192;3193;3194;3195;3196;3197;3198;3199;3200;3201;3202;3203;3204;3205;3206;3207;3208;3209;3210;3211;3212;3213;3214;3215;3216;3217;3218;3219;3220;3221;3222;3223;3224;3225;3226;3227;3228	3346;3347;3348;3349;3350;3351;3352;3353;3354;3355;3356;3357;3358;3359;3360;3361;3362;3363;3364;3365;3366;3367;3368;3369;3370;3371;3372;3373;3374;3375;3376;3377;3378;3379;3380;3381;3382;3383;3384;3385;3386;3387;3388;3389;3390;3391;3392;3393;3394;3395;3396;3397	3186	3348	Service_Sonenberg_150119_2
D3YXK2	626	D3YXK2	D3YXK2	Scaffold attachment factor B1	Safb		0.999459	32.668	0.0107229	51.762	26.839	51.762	1	S	SQDRKSASREKRSVVSFDKVKESRKSRDSES	X;X;X;X;X;X;X;X;X;X;X;X;X;X;X;Phospho (STY);X;X;X;X;X;X;X;X;X;X;X;X;X;X;X	XXXXXXXXXXXXPPPPPPPPPXXXXXXXXXX	S(0.001)VVS(0.999)FDKVK	S(-32.67)VVS(32.67)FDKVK	4	2	0.67233	335320	727170	286910	189320	343950	350270	566570	742850	673420	324460	235500	299870	209790	301970	310990	156360	313630	348470	626	626	2999	3298	43349;43350;43351;43352;43353;43354;43355;43356;43357;43358;43359;43360;43361;43362;43363;43364;43365;43366	44156;44157;44158;44159;44160;44161;44162;44163	43349	44156	Service_Sonenberg_150119_2
D3YZP9	237	D3YZP9	D3YZP9	Coiled-coil domain-containing protein 6	Ccdc6		0.999999	59.5439	0.000283119	90.759	73.547	90.759	1	S	RILQEKLDQPVSAPPSPRDISMEIDSPENMM	X;X;X;X;X;X;X;X;X;X;X;X;X;X;X;Phospho (STY);X;X;X;X;X;X;X;X;X;X;X;X;X;X;X	XXXXXXPPPPPPPPPPPPXXXXXXXXXXXXX	LDQPVSAPPS(1)PR	LDQPVS(-59.54)APPS(59.54)PR	10	2	0.16828	0	0	0	0	359830	3417500	11919000	3949100	8768000	8971000	0	5567400	8058900	3739000	5376800	5767700	8475100	5145000	237	237	1544	1680	22081;22082;22083;22084;22085;22086;22087;22088;22089;22090;22091;22092;22093	22575	22081	22575	Service_Sonenberg_150119_10
D3Z6Q9	391	D3Z6Q9	D3Z6Q9	Bridging integrator 2	Bin2		0.75011	4.77378	4.55082e-10	113.8	71.08	113.8	1	S	KDTPSPGDVVLRARASSEGAEQSKRAASIQR	X;X;X;X;X;X;X;X;X;X;X;X;X;X;X;Phospho (STY);X;X;X;X;X;X;X;X;X;X;X;X;X;X;X	XXXXXXXXXXXXPPPPPPPPPPPPPXXXXXX	ARAS(0.75)S(0.25)EGAEQSK	ARAS(4.77)S(-4.77)EGAEQS(-62.66)K	4	2	-0.46436	0	259470	151160000	137100000	185410000	33209000	232230000	0	0	274080000	163670000	89221000	0	179310000	28796000	56629000	0	65057000	391	391	236;237;278	259;260;308	3472;3482;3483;3485;3487;3489;3490;3494;3496;3497;3500;3502;3505;3506;3511;3512;3514;3516	3694;3701;3702;3703;3704;3705;3708;3710;3711;3714;3715;3716;3723;3724;3727;3728;3729;3732;3734;3735;3739;3740;3741;3742;3751;3752	3472	3694	Service_Sonenberg_150119_12
D3Z6Q9	392	D3Z6Q9	D3Z6Q9	Bridging integrator 2	Bin2		0.998737	28.9814	1.65394e-147	183.06	159.6	179.27	1	S	DTPSPGDVVLRARASSEGAEQSKRAASIQRT	X;X;X;X;X;X;X;X;X;X;X;X;X;X;X;Phospho (STY);X;X;X;X;X;X;X;X;X;X;X;X;X;X;Phospho (STY)	XXXXXXXXXXXPPPPPPPPPPPPPXXXXXXX	ARAS(0.001)S(0.999)EGAEQSKR	ARAS(-28.98)S(28.98)EGAEQS(-87.65)KR	5	2	0.36239	140760000	78867000	151160000	0	185410000	543090	232230000	41820000	296380000	274080000	163670000	89221000	478840	179310000	28796000	56629000	61462000	65057000	392	392	236;237;278	259;260;308	3471;3473;3474;3475;3476;3477;3478;3479;3481;3482;3484;3485;3486;3488;3489;3490;3491;3492;3493;3494;3495;3496;3497;3499;3500;3501;3502;3503;3504;3505;3506;3507;3508;3509;3510;3511;3513;3514;3515;3516;4312;4313;4314;4315;4316;4317;4318;4319;4320;4321;4322;4323;4324;4325;4326;4327	3693;3695;3696;3697;3698;3700;3701;3706;3707;3708;3709;3712;3713;3714;3715;3716;3717;3718;3719;3720;3721;3722;3723;3724;3725;3726;3727;3728;3729;3731;3732;3733;3734;3735;3736;3737;3738;3739;3740;3741;3742;3743;3744;3745;3746;3747;3748;3749;3750;3751;3752;5323;5324;5325;5326;5327;5328;5329;5330;5331;5332;5333;5334;5335;5336;5337;5338;5339;5340;5341;5342;5343;5344;5345;5346;5347;5348;5349	3488	3712	Service_Sonenberg_150119_6
D3Z6Q9	420	D3Z6Q9	D3Z6Q9	Bridging integrator 2	Bin2		0.332405	0	1.85456e-08	55.186	44.86	55.186		S	QRTSAPPSRPPPPRASGSGSCNAPGSPEGSS	X;X;Phospho (STY);X;X;X;X;X;X;X;X;X;X;X;X;Phospho (STY);X;X;X;X;X;X;X;X;X;X;X;X;X;X;X	XXXXXXXXXXXXXXPPPPPPPPPPPPPPPPP	AS(0.332)GS(0.332)GS(0.332)CNAPGS(0.003)PEGSSQLCSPR	AS(0)GS(0)GS(0)CNAPGS(-20.97)PEGS(-36.41)S(-39.09)QLCS(-47.47)PR	2	2	0.074313	0	0	0	0	0	0	0	0	0	0	0	0	0	0	0	0	0	0	420	420	262	287;288			3895	4114	Service_Sonenberg_150119_14
D3Z6Q9	422	D3Z6Q9	D3Z6Q9	Bridging integrator 2	Bin2		0.332405	0	1.85456e-08	55.186	44.86	55.186		S	TSAPPSRPPPPRASGSGSCNAPGSPEGSSQL	Phospho (STY);X;X;X;X;X;X;X;X;X;X;X;X;X;X;Phospho (STY);X;X;X;X;X;X;X;X;X;X;X;X;X;X;X	XXXXXXXXXXXXPPPPPPPPPPPPPPPPPPP	AS(0.332)GS(0.332)GS(0.332)CNAPGS(0.003)PEGSSQLCSPR	AS(0)GS(0)GS(0)CNAPGS(-20.97)PEGS(-36.41)S(-39.09)QLCS(-47.47)PR	4	2	0.074313	0	0	0	0	0	0	0	0	0	0	0	0	0	0	0	0	0	0	422	422	262	287;288			3895	4114	Service_Sonenberg_150119_14
D3Z6Q9	424	D3Z6Q9	D3Z6Q9	Bridging integrator 2	Bin2		0.425287	0.940309	3.49576e-29	56.366	47.203	55.406		S	APPSRPPPPRASGSGSCNAPGSPEGSSQLCS	X;X;X;X;X;X;X;X;X;X;X;X;X;X;X;Phospho (STY);X;X;X;X;X;Phospho (STY);X;X;X;X;X;X;X;X;X	XXXXXXXXXXPPPPPPPPPPPPPPPPPPPPP	AS(0.3)GS(0.352)GS(0.425)CNAPGS(0.92)PEGS(0.002)S(0.001)QLCSPR	AS(-1.86)GS(-0.94)GS(0.94)CNAPGS(11.35)PEGS(-26.69)S(-30.88)QLCS(-44.79)PR	6	3	0.57802	0	0	0	0	0	0	0	0	0	0	0	0	0	0	0	0	0	0	424	424	262	287;288			3907	4119	Service_Sonenberg_150119_1
D3Z6Q9	430	D3Z6Q9	D3Z6Q9	Bridging integrator 2	Bin2		0.979746	18.0993	3.49576e-29	59.163	49.022	56.366	1;2	S	PPPRASGSGSCNAPGSPEGSSQLCSPRASPD	X;X;X;X;X;X;X;X;X;Phospho (STY);X;X;X;X;X;Phospho (STY);X;X;X;X;X;X;X;X;X;X;X;X;Phospho (STY);X;X	XXXXPPPPPPPPPPPPPPPPPPPPPPPXXXX	AS(0.292)GS(0.324)GS(0.401)CNAPGS(0.98)PEGS(0.002)S(0.001)QLCSPR	AS(-1.43)GS(-0.96)GS(0.96)CNAPGS(18.1)PEGS(-26.41)S(-30.72)QLCS(-45.11)PR	12	3	0.00099266	18442000	10536000	0	0	0	12380000	0	0	0	0	0	0	0	0	0	14589000	18655000	0	430	430	262	287;288	3887;3888;3889;3891;3896;3897;3898;3907;3908;3909	4105;4106;4107;4109;4110;4115;4116;4117;4119;4120;4121	3909	4121	Service_Sonenberg_150119_13
D3Z6Q9	443	D3Z6Q9	D3Z6Q9	Bridging integrator 2	Bin2		0.999376	32.191	6.0325e-32	131.96	109.64	91.076	1	S	PGSPEGSSQLCSPRASPDASSNPEPAETREK	X;X;Phospho (STY);X;X;X;X;X;X;X;X;X;X;X;X;Phospho (STY);X;X;X;X;X;X;X;X;X;X;X;X;X;X;X	XXXXXXXXXXXXXXPPPPPPPPPPPPPPPXX	AS(0.999)PDAS(0.001)SNPEPAETR	AS(32.19)PDAS(-32.19)S(-46.82)NPEPAET(-82.28)R	2	2	0.79176	3280900	876920	3176000	2192600	1310300	1284800	3834100	1754300	2086400	4357700	2870400	1681000	3653500	3900200	3313900	1800900	3239400	732760	443	443	272	302	4230;4231;4232;4233;4234;4235;4236;4237;4238;4239;4240;4241;4242;4243;4244;4245;4246;4247;4248	5196;5197;5198;5199;5200;5201;5202;5203;5204;5205;5206;5207;5208;5209;5210;5211;5212;5213;5214;5215;5216;5217;5218;5219;5220;5221;5222;5223;5224;5225;5226;5227;5228;5229;5230;5231;5232;5233;5234	4234	5203	Service_Sonenberg_150119_4
D3Z6Q9	463	D3Z6Q9	D3Z6Q9	Bridging integrator 2	Bin2		0.915217	10.3321	2.53817e-47	148.52	128.78	130.2	1	S	SNPEPAETREKEGAGSSGPEEPRAVSTKSAT	X;X;X;X;X;X;X;X;X;X;X;X;X;X;X;Phospho (STY);X;X;X;X;X;X;X;X;X;X;X;X;X;X;X	XXXXXXXXXPPPPPPPPPPPPPPXXXXXXXX	EKEGAGS(0.915)S(0.085)GPEEPR	EKEGAGS(10.33)S(-10.33)GPEEPR	7	2	0.023177	0	548030	1182800	0	1029400	0	0	1112200	1724600	1446400	0	0	0	0	1526500	1452500	0	748720	463	463	651	709	9083;9084;9085;9087;9088;9089;9092;9093;9094	9768;9769;9770;9771;9772;9774;9775;9776;9779;9780;9781	9094	9781	Service_Sonenberg_150119_18
D3Z6Q9	464	D3Z6Q9	D3Z6Q9	Bridging integrator 2	Bin2		0.787133	5.67941	1.34172e-160	141.82	120.78	141.82	1	S	NPEPAETREKEGAGSSGPEEPRAVSTKSATQ	X;X;X;X;X;X;X;X;X;X;X;X;X;X;X;Phospho (STY);X;X;X;X;X;X;X;X;X;X;X;X;X;X;X	XXXXXXXXPPPPPPPPPPPPPPXXXXXXXXX	EKEGAGS(0.213)S(0.787)GPEEPR	EKEGAGS(-5.68)S(5.68)GPEEPR	8	2	0.29075	2407800	548030	1182800	0	1029400	1046300	3118700	0	0	1446400	1346100	1150700	1851900	3041300	0	0	0	0	464	464	651	709	9082;9083;9084;9085;9086;9089;9090;9091;9095;9096;9097	9767;9768;9769;9770;9771;9772;9773;9776;9777;9778	9090	9777	Service_Sonenberg_150119_13
D3Z6Q9	254	D3Z6Q9	D3Z6Q9	Bridging integrator 2	Bin2		0.332898	0	0.0132018	42.287	22.146	42.287		S	EKQHSNKVFVVKGLSSSSRRSLVISPPVQSC	X;X;X;X;X;X;X;X;X;X;X;X;X;X;X;Phospho (STY);X;X;X;X;X;X;X;X;X;X;X;X;X;X;X	XXXXXXXXXXXXPPPPPPPPXXXXXXXXXXX	GLS(0.001)S(0.333)S(0.333)S(0.333)RR	GLS(-24.06)S(0)S(0)S(0)RR	4	2	-0.16873	0	0	0	0	0	0	0	0	0	0	0	0	0	0	0	0	0	0	254	254	954	1031			13208	13660	Service_Sonenberg_150119_10
D3Z6Q9	255	D3Z6Q9	D3Z6Q9	Bridging integrator 2	Bin2		0.332898	0	0.0132018	42.287	22.146	42.287		S	KQHSNKVFVVKGLSSSSRRSLVISPPVQSCA	X;X;X;X;X;X;X;X;X;X;X;X;X;X;X;X;X;X;X;X;X;X;X;X;X;X;X;X;X;X;X	XXXXXXXXXXXXXXXXXXXXXXXXXXXXXXX	GLS(0.001)S(0.333)S(0.333)S(0.333)RR	GLS(-24.06)S(0)S(0)S(0)RR	5	2	-0.16873	0	0	0	0	0	0	0	0	0	0	0	0	0	0	0	0	0	0	255	255	954	1031			13208	13660	Service_Sonenberg_150119_10
D3Z6Q9	256	D3Z6Q9	D3Z6Q9	Bridging integrator 2	Bin2		0.332898	0	0.0132018	42.287	22.146	42.287		S	QHSNKVFVVKGLSSSSRRSLVISPPVQSCAA	X;X;X;X;X;X;X;X;X;X;X;X;X;X;X;X;X;X;X;X;X;X;X;X;X;X;X;X;X;X;X	XXXXXXXXXXXXXXXXXXXXXXXXXXXXXXX	GLS(0.001)S(0.333)S(0.333)S(0.333)RR	GLS(-24.06)S(0)S(0)S(0)RR	6	2	-0.16873	0	0	0	0	0	0	0	0	0	0	0	0	0	0	0	0	0	0	256	256	954	1031			13208	13660	Service_Sonenberg_150119_10
D3Z6Q9	408	D3Z6Q9	D3Z6Q9	Bridging integrator 2	Bin2		0.499933	0	0.00141834	50.473	41.941	46.462	1	S	EGAEQSKRAASIQRTSAPPSRPPPPRASGSG	X;X;X;X;X;X;X;X;X;X;X;X;X;X;X;X;X;X;X;X;X;X;X;X;X;X;X;Phospho (STY);X;Phospho (STY);X	XXXXXXXXXXXXXXXXXXXXXXXXXXXXXXX	T(0.5)S(0.5)APPSRPPPPR	T(0)S(0)APPS(-35.7)RPPPPR	2	2	-0.2825	0	0	0	0	0	0	0	0	0	0	0	0	0	0	5176800	0	0	0	408	408	3186	3505	46140	46988	46140	46988	Service_Sonenberg_150119_15
E2JF22	1864	E2JF22	E2JF22	Piezo-type mechanosensitive ion channel component 1	Piezo1		1	54.3433	0.00680876	54.343	33.043	54.343	1	S	PVLAGTPRDHIQGKGSIRSKDVIQDPPEDLK	X;X;X;X;X;X;X;X;X;X;X;X;X;X;X;Phospho (STY);X;X;X;X;X;X;X;X;X;X;X;X;X;X;X	XXXXXXXXPPPPPPPPPPXXXXXXXXXXXXX	DHIQGKGS(1)IR	DHIQGKGS(54.34)IR	8	2	0.27436	2304800	861800	0	0	0	393160	1450000	0	0	1342900	699460	0	569360	0	0	0	0	0	1864	1864	421	465	6152;6153;6154;6155;6156;6157;6158	7350	6152	7350	Service_Sonenberg_150119_1
E2JF22	1385	E2JF22	E2JF22	Piezo-type mechanosensitive ion channel component 1	Piezo1		0.965211	16.584	8.70673e-24	66.474	61.155	53.867	1	S	QSKDPQDPSQEPGPDSPGGSSPPRRQWWRPW	X;X;X;X;X;X;X;X;X;X;X;X;X;X;X;Phospho (STY);X;X;X;X;X;X;X;X;X;X;X;X;X;X;X	PPPPPPPPPPPPPPPPPPPPPPPPPXXXXXX	GQLQS(0.002)KDPQDPS(0.021)QEPGPDS(0.965)PGGS(0.009)S(0.003)PPR	GQLQS(-26.74)KDPQDPS(-16.58)QEPGPDS(16.58)PGGS(-20.51)S(-25.13)PPR	19	3	0.38235	3933100	0	0	0	3784200	4070500	5186600	0	0	6223800	0	3408600	0	0	0	5582000	7314900	4101300	1385	1385	980;981	1059;1060	13463;13464;13465;13466;13467;13468;13469;13470;13471;13472;13473;13474;13475	13813;13814;13815;13816;13817;13818;13819;13820;13821;13822;13823;13824;13825;13826;13827;13828	13468	13820	Service_Sonenberg_150119_12
E2JF22	1646	E2JF22	E2JF22	Piezo-type mechanosensitive ion channel component 1	Piezo1		0.997855	26.6774	0.00198309	121.6	90.314	66.595	1	S	SQELLANARTRMRTASELLLDRRLHIPELEE	X;X;X;X;X;X;X;X;X;X;X;X;X;X;X;Phospho (STY);X;X;X;X;X;X;X;X;X;X;X;X;X;X;X	XXXXXXXXXXXXXPPPPPPPPPXXXXXXXXX	T(0.002)AS(0.998)ELLLDR	T(-26.68)AS(26.68)ELLLDR	3	2	-0.44904	0	580150	666610	368750	322110	390440	568650	432990	518830	276150	339300	352070	329830	392300	424490	398010	392290	0	1646	1646	3025	3329	43732;43733;43734;43735;43736;43737;43738;43739;43740;43741;43742;43743;43744;43745;43746;43747	44526;44527;44528;44529;44530;44531;44532	43735	44529	Service_Sonenberg_150119_7
E9Q1P8	343	E9Q1P8	E9Q1P8	Interferon regulatory factor 2-binding protein 2	Irf2bp2		1	46.9257	3.76267e-06	87.083	72.392	46.926	1	S	NGSKAVARTARKRKPSPEPEGEVGPPKINGE	X;X;X;X;X;X;X;X;X;X;X;X;X;X;X;Phospho (STY);X;X;X;X;X;X;X;X;X;X;X;X;X;X;X	XXXXXXXXXXXXPPPPPPPPPPPPPPPXXXX	RKPS(1)PEPEGEVGPPK	RKPS(46.93)PEPEGEVGPPK	4	2	-0.41546	2960100	1221900	0	0	0	1277300	2808300	1771800	1891600	3025100	2194200	2384100	3778700	3445000	2807200	1606200	3849300	1506100	343	343	1423;2149	1545;2364	20226;20227;20228;20229;20230;20231;20232;20233;20234;20235;20236;20237;20238;20239;20240;30550;30551;30552;30553;30554;30555;30556;30557;30558;30559;30560;30561;30562;30563;30564;30565;30566;30567	20726;20727;20728;20729;20730;20731;20732;20733;20734;20735;20736;20737;20738;20739;20740;20741;20742;20743;20744;20745;20746;29971;29972;29973;29974;29975	30553	29975	Service_Sonenberg_150119_17
E9Q1P8	169	E9Q1P8	E9Q1P8	Interferon regulatory factor 2-binding protein 2	Irf2bp2		1	41.202	1.58934e-06	56.959	42.918	41.202	1	S	NGFSKLEEPPELNRQSPNPRRAHAVPPTLVP	X;X;X;X;X;X;X;X;X;X;X;X;X;X;X;Phospho (STY);X;X;X;X;X;X;X;X;X;X;X;X;X;X;X	XXXXXPPPPPPPPPPPPPPPXXXXXXXXXXX	LEEPPELNRQS(1)PNPR	LEEPPELNRQS(41.2)PNPR	11	3	-0.19946	0	15348000	0	0	0	12671000	0	15231000	0	0	11144000	0	0	0	24012000	9248800	0	13250000	169	169	1554	1690	22220;22221;22222;22223;22224;22225;22226	22662;22663;22664;22665;22666;22667;22668;22669	22226	22669	Service_Sonenberg_150119_18
E9Q1P8	438	E9Q1P8	E9Q1P8	Interferon regulatory factor 2-binding protein 2	Irf2bp2		0.902019	9.62792	1.26019e-06	57.045	47.988	41.542	2	S	ASKDATQVHSTTRRNSSSPPSPSSMNQRRLG	X;X;X;X;X;X;X;X;X;X;X;X;X;X;X;Phospho (STY);X;Phospho (STY);X;X;Phospho (STY);X;X;X;X;X;X;X;X;X;X	XXXXXXXXXXXXXPPPPPPPPPPPPPPPXXX	RNS(0.902)S(0.168)S(0.758)PPS(0.118)PS(0.04)S(0.013)MNQR	RNS(9.63)S(-9.63)S(8.23)PPS(-8.23)PS(-12.99)S(-18.01)MNQR	3	2	-1.0993	0	546200	439860	0	1151400	1800000	0	617440	1561200	1389500	2062400	1311100	0	0	1272800	2056200	2193000	1285300	438	438	1880;2204	2067;2068;2424	31372;31373;31374;31375;31376;31377;31379;31380;31381;31382;31383;31384;31385;31386	30884;30885;30886;30887;30888;30889	31372	30884	Service_Sonenberg_150119_10
E9Q1P8	439	E9Q1P8	E9Q1P8	Interferon regulatory factor 2-binding protein 2	Irf2bp2		0.562102	1.73428	5.48676e-06	89.171	76.611	42.118	1	S	SKDATQVHSTTRRNSSSPPSPSSMNQRRLGP	X;X;X;X;X;X;X;X;X;X;X;X;X;X;X;Phospho (STY);X;X;X;Phospho (STY);X;X;X;X;X;X;X;X;X;X;X	XXXXXXXXXXXXPPPPPPPPPPPPPPPXXXX	RNS(0.381)S(0.562)S(0.063)PPS(0.903)PS(0.068)S(0.023)MNQR	RNS(-1.73)S(1.73)S(-10)PPS(11.46)PS(-11.46)S(-16.2)MNQR	4	3	-1.3618	0	0	0	1808200	818400	0	0	0	0	0	0	0	0	0	1899100	0	0	0	439	439	1880;2204	2067;2068;2424	26896;31371;31378	26652;30883	31371	30883	Service_Sonenberg_150119_4
E9Q1P8	440	E9Q1P8	E9Q1P8	Interferon regulatory factor 2-binding protein 2	Irf2bp2		0.758188	8.22844	5.48676e-06	89.171	76.611	41.542	2	S	KDATQVHSTTRRNSSSPPSPSSMNQRRLGPR	X;X;X;X;X;X;X;X;X;X;X;X;X;Phospho (STY);X;Phospho (STY);X;X;X;X;X;X;X;X;X;X;X;X;X;X;X	XXXXXXXXXXXPPPPPPPPPPPPPPPXXXXX	RNS(0.902)S(0.168)S(0.758)PPS(0.118)PS(0.04)S(0.013)MNQR	RNS(9.63)S(-9.63)S(8.23)PPS(-8.23)PS(-12.99)S(-18.01)MNQR	5	2	-1.0993	0	0	0	0	0	0	0	0	0	1464400	0	0	0	0	0	0	0	0	440	440	1880;2204	2067;2068;2424	31372	30884	31372	30884	Service_Sonenberg_150119_10
E9Q1P8	443	E9Q1P8	E9Q1P8	Interferon regulatory factor 2-binding protein 2	Irf2bp2		0.972102	18.6512	1.26019e-06	57.045	47.988	55.335	2	S	TQVHSTTRRNSSSPPSPSSMNQRRLGPREVG	X;X;X;X;X;X;X;X;X;X;Phospho (STY);Phospho (STY);X;X;X;Phospho (STY);X;X;X;X;X;X;X;X;X;X;X;X;X;X;X	XXXXXXXXPPPPPPPPPPPPPPPXXXXXXXX	NS(0.361)S(0.292)S(0.359)PPS(0.972)PS(0.012)S(0.003)MNQR	NS(0)S(-0.93)S(0)PPS(18.65)PS(-19.14)S(-25)MNQR	7	2	-4.3652	0	546200	439860	1808200	1151400	1800000	0	617440	1561200	1389500	2062400	1311100	0	0	1272800	2056200	2193000	1285300	443	443	1880;2204	2067;2068;2424	26889;26890;26891;26892;31371;31373;31374;31375;31376;31377;31378;31379;31380;31381;31382;31383;31384;31385;31386	26644;26645;26646;30883;30885;30886;30887;30888;30889	26889	26645	Service_Sonenberg_150119_1
E9Q1P8	226	E9Q1P8	E9Q1P8	Interferon regulatory factor 2-binding protein 2	Irf2bp2		0.880118	9.80098	1.37643e-06	63.578	42.021	49.188	1	S	LGAQPAELGTHKRPASVSSAAAEHEAREPSK	X;X;X;X;X;X;X;X;X;X;X;X;X;X;X;Phospho (STY);X;X;X;X;X;X;X;X;X;X;X;X;X;X;X	XXXXXXXXXXXXPPPPPPPPPPPPPPPXXXX	RPAS(0.88)VS(0.092)S(0.028)AAAEHEAR	RPAS(9.8)VS(-9.8)S(-15.01)AAAEHEAR	4	3	1.3842	0	468340	0	0	0	0	0	0	1161500	493560	968560	0	0	0	0	859440	2394500	1611600	226	226	2215	2436	31506;31507;31508;31509;31510;31511;31512	31008;31009;31010;31011;31012	31506	31008	Service_Sonenberg_150119_9
E9Q555	271	E9Q555	E9Q555	E3 ubiquitin-protein ligase RNF213	Rnf213		0.876381	8.50671	2.32779e-18	127.32	99.458	87.824	1	S	TAGKETGEDVRKPKPSPVSPVASKHGDQEAE	X;X;X;X;X;X;X;X;X;X;X;X;X;X;X;Phospho (STY);X;X;X;X;X;X;X;X;X;X;X;X;X;X;X	XXXXXXXXXXXPPPPPPPPPPPPPXXXXXXX	KPKPS(0.876)PVS(0.124)PVASK	KPKPS(8.51)PVS(-8.51)PVAS(-46.73)K	5	2	0.24325	0	0	796180	0	2303300	2529300	1439800	418140	0	3038400	0	0	1699700	1252600	940160	1773900	3870600	0	271	271	1413	1534	20079;20080;20082;20086;20090;20093;20095;20099;20101;20103;20105	20520;20521;20522;20523;20525;20526;20531;20532	20086	20531	Service_Sonenberg_150119_17
E9Q555	274	E9Q555	E9Q555	E3 ubiquitin-protein ligase RNF213	Rnf213		0.984251	18.0372	9.84256e-06	95.57	86.326	76.358	1	S	KETGEDVRKPKPSPVSPVASKHGDQEAELKG	X;X;X;X;X;X;X;X;X;X;X;X;X;X;X;Phospho (STY);X;X;X;X;X;X;X;X;X;X;X;X;X;X;X	XXXXXXXXPPPPPPPPPPPPPXXXXXXXXXX	KPKPS(0.015)PVS(0.984)PVASK	KPKPS(-18.04)PVS(18.04)PVAS(-35.42)K	8	2	-0.35407	4272000	1876800	3621100	0	0	11582000	6521400	2324400	3572600	13372000	9106300	0	5313300	4817400	3451400	0	0	0	274	274	1413	1534	20078;20081;20083;20084;20085;20087;20088;20089;20091;20092;20094;20096;20097;20098;20100;20102;20104	20518;20519;20524;20527;20528;20529;20530;20533;20534	20085	20530	Service_Sonenberg_150119_12
E9Q5K9	146	E9Q5K9	E9Q5K9	YTH domain-containing protein 1	Ythdc1		0.999789	36.0344	0.00104586	64.65	53.486	61.212	1;2	S	EKTCLRKRDSERRAKSPTPDGSERIGLEVDR	X;X;X;X;X;X;X;X;X;X;X;X;X;X;X;Phospho (STY);X;Phospho (STY);X;X;X;Phospho (STY);X;X;X;X;X;X;X;X;X	XXXXXXXXXXXXPPPPPPPPPPPPXXXXXXX	RAKS(1)PT(0.152)PDGS(0.848)ER	RAKS(36.03)PT(-7.46)PDGS(7.46)ER	4	2	-0.63065	6921900	430860	0	3703600	0	965390	3732400	947610	5835700	3244100	1848100	1940100	0	5906500	2926900	2928300	3987500	1386600	146	146	147;2035	156;2239	2056;2057;2058;2059;28901;28902;28903;28904;28905;28906;28907;28908;28909;28910;28911;28912;28913;28914;28915	2057;28293;28294;28295;28296;28297;28298;28299;28300;28301;28302;28303;28304;28305;28306;28307;28308	28910	28304	Service_Sonenberg_150119_14
E9Q5K9	152	E9Q5K9	E9Q5K9	YTH domain-containing protein 1	Ythdc1		0.847814	7.45817	0.00104586	61.212	52.68	61.212	2	S	KRDSERRAKSPTPDGSERIGLEVDRRASRSS	X;X;X;X;X;X;X;X;X;Phospho (STY);X;X;X;X;X;Phospho (STY);X;X;X;X;X;X;X;X;X;X;X;X;X;X;X	XXXXXXPPPPPPPPPPPPXXXXXXXXXXXXX	RAKS(1)PT(0.152)PDGS(0.848)ER	RAKS(36.03)PT(-7.46)PDGS(7.46)ER	10	2	-0.63065	0	0	0	3703600	0	709180	3732400	459980	5835700	896200	0	1940100	0	5906500	2090500	0	3987500	0	152	152	147;2035	156;2239	28902;28903;28904;28905;28906;28909;28910;28911;28913;28915	28294;28295;28296;28297;28298;28299;28303;28304;28305;28307	28910	28304	Service_Sonenberg_150119_14
E9Q5K9	54	E9Q5K9	E9Q5K9	YTH domain-containing protein 1	Ythdc1		0.992637	21.3897	0.00313901	84.213	49.492	84.213	1	S	KNEKKGSKRKSERMESTDTKRQKPSIHSRQL	X;X;X;X;X;X;X;X;X;X;X;X;X;X;X;Phospho (STY);X;X;X;X;X;X;X;X;X;X;X;X;X;X;X	XXXXXXXXXXXXXPPPPPPPPXXXXXXXXXX	MES(0.993)T(0.007)DTKR	MES(21.39)T(-21.39)DT(-38.05)KR	3	2	0.95206	0	0	0	5754300	0	527630	0	0	0	11431000	4875600	5132500	0	0	0	0	2975700	0	54	54	1709	1863	24201;24202;24203;24204;24205;24206;24207	24222;24223;24224;24225;24226;24227	24201	24222	Service_Sonenberg_150119_4
E9Q612	875	E9Q612	E9Q612	Receptor-type tyrosine-protein phosphatase O	Ptpro		0.999977	46.3842	2.77296e-06	63.709	52.176	63.128	1	S	QMARECGAGTFVNFASLEREGKLPYSWRRSV	X;X;X;X;X;X;X;X;X;X;X;X;X;X;X;Phospho (STY);X;X;X;X;X;X;X;X;X;X;X;X;X;X;X	XXXXPPPPPPPPPPPPPPPXXXXXXXXXXXX	ECGAGTFVNFAS(1)LER	ECGAGT(-46.38)FVNFAS(46.38)LER	12	2	1.1477	1137800	809870	1311100	1222600	1039000	890960	1091400	0	0	601970	0	0	877010	560400	752290	504170	807370	841560	875	875	590	643	8258;8259;8260;8261;8262;8263;8264;8265;8266;8267;8268;8269;8270;8271	9072;9073;9074	8259	9074	Service_Sonenberg_150119_2
E9Q634;P70248	736;734	E9Q634;P70248	P70248	Unconventional myosin-Ie;Unconventional myosin-If	Myo1e;Myo1f		1	41.8761	0.0013186	103.87	74.456	41.876	1	S	EASDLLLNKKERRRNSINRNFIGDYIGMEER;EASNILLNKKERRRNSINRNFVGNYLGLEER	X;X;X;X;X;X;X;X;X;X;X;X;X;X;Deamidation (NQ);Phospho (STY);X;X;X;X;X;X;X;X;X;X;X;X;X;X;X	XXXXXXXXXXXXPPPPPPPXXXXXXXXXXXX	RRNS(1)INR	RRNS(41.88)INR	4	3	0.085522	7360900	5332200	0	0	0	717340	25313000	6069700	33758000	25697000	14751000	5262200	5206800	16647000	7147300	6767600	10769000	3877200	736;734	734	2259	2481;2482	32130;32131;32132;32133;32134;32135;32136;32137;32138;32139;32140;32141;32142;32143;32144;32145;32146;32147;32148;32149;32150;32151;32152;32153;32154;32155;32156;32157;32158;32159;32160;32161;32162;32163;32164;32165;32166;32167;32168;32169;32170;32171;32172;32173;32174;32175;32176;32177;32178;32179;32180;32181;32182;32183;32184;32185;32186;32187;32188;32189	31625;31626;31627;31628;31629;31630;31631;31632;31633;31634;31635;31636;31637;31638;31639;31640;31641;31642;31643;31644;31645;31646;31647;31648;31649	32168	31649	Service_Sonenberg_150119_17
E9Q7Y3	36	E9Q7Y3	E9Q7Y3	Uncharacterized protein ENSP00000471857 homolog			1	44.5672	0.000203438	62.861	56.829	44.567	2	S	VPRASSQTRIHTPGASPQLRPRQQADLALSP	X;X;X;X;X;X;X;X;X;X;X;Phospho (STY);X;X;X;Phospho (STY);X;X;X;X;X;X;X;X;X;X;X;X;X;X;X	XXXXXXXXXPPPPPPPPPPPPPXXXXXXXXX	IHT(1)PGAS(1)PQLRPR	IHT(44.57)PGAS(44.57)PQLRPR	7	3	-0.23301	0	285840	0	0	0	402360	2898100	0	0	1227600	588890	506460	0	1416700	0	0	352470	332810	36	36	1213	1318	16998;16999;17000;17001;17002;17003;17004;17005;17006	17485;17486	16999	17486	Service_Sonenberg_150119_10
E9Q8I9	1936	E9Q8I9	E9Q8I9	Protein furry homolog	Fry		0.990827	20.3357	0.00182712	60.49	44.95	60.49	1	S	NLSDCLKNSDLFTVLSRSSSPDLSSSSKLTA	X;X;X;X;X;X;X;X;X;X;X;X;X;X;X;Phospho (STY);X;Phospho (STY);X;Phospho (STY);X;X;X;X;X;X;X;X;X;X;X	XXXXXXXPPPPPPPPPPXXXXXXXXXXXXXX	NSDLFT(0.009)VLS(0.991)R	NS(-58.43)DLFT(-20.34)VLS(20.34)R	9	2	-0.2583	428860	0	297870	91404	73712	87101	180050	0	79544	0	92440	56471	92387	84611	177100	35129	63926	65744	1936	1936	1861	2046	26611;26612;26613;26614;26615;26616;26617;26618;26619;26620;26621;26622;26623;26624;26625	26413;26414;26415;26416;26417	26611	26413	Service_Sonenberg_150119_1
E9Q8I9	1938	E9Q8I9	E9Q8I9	Protein furry homolog	Fry		0.360875	0	0.00140658	61.65	45.117	61.65		S	SDCLKNSDLFTVLSRSSSPDLSSSSKLTASR	X;X;X;X;X;X;X;X;X;X;X;X;X;Phospho (STY);X;Phospho (STY);X;X;X;X;X;X;X;X;X;X;X;X;X;X;X	XXXXXXXXXXXXXXXPPPPPPPPPPPXXXXX	S(0.361)S(0.361)S(0.278)PDLSSSSK	S(0)S(0)S(-1.13)PDLS(-36.2)S(-41.53)S(-41.64)S(-47.93)K	1	2	0.0199	0	0	0	0	0	0	0	0	0	0	0	0	0	0	0	0	0	0	1938	1938	2894	3186			41875	42537	Service_Sonenberg_150119_12
E9Q8I9	1939	E9Q8I9	E9Q8I9	Protein furry homolog	Fry		0.360875	0	0.00140658	61.65	45.117	61.65		S	DCLKNSDLFTVLSRSSSPDLSSSSKLTASRK	X;X;X;X;X;X;X;X;X;X;X;X;Phospho (STY);X;X;X;X;X;X;X;X;X;X;X;X;X;X;X;X;X;X	XXXXXXXXXXXXXXXXXXXXXXXXXXXXXXX	S(0.361)S(0.361)S(0.278)PDLSSSSK	S(0)S(0)S(-1.13)PDLS(-36.2)S(-41.53)S(-41.64)S(-47.93)K	2	2	0.0199	0	0	0	0	0	0	0	0	0	0	0	0	0	0	0	0	0	0	1939	1939	2894	3186			41875	42537	Service_Sonenberg_150119_12
E9Q8I9	1940	E9Q8I9	E9Q8I9	Protein furry homolog	Fry		0.920024	13.6456	0.000683915	81.92	55.17	54.023	1	S	CLKNSDLFTVLSRSSSPDLSSSSKLTASRKS	X;X;X;X;X;X;X;X;X;X;X;Phospho (STY);X;X;X;Phospho (STY);X;X;X;X;X;X;X;X;X;X;X;X;X;X;X	XXXXXXXXXXXXXPPPPPPPPPPPXXXXXXX	S(0.04)S(0.04)S(0.92)PDLSSSSK	S(-13.65)S(-13.65)S(13.65)PDLS(-34.75)S(-38.92)S(-42.79)S(-46.85)K	3	2	-0.14977	0	0	0	0	0	0	4252700	1677100	3041100	3808900	2906800	0	3729900	0	3212700	2716100	0	2310800	1940	1940	2894	3186	41872;41873;41874;41876;41877;41878;41879;41880;41881	42534;42535;42536	41873	42535	Service_Sonenberg_150119_8
F6ZDS4	2129	F6ZDS4	F6ZDS4	Nucleoprotein TPR	Tpr		0.648372	4.91794	0.00492458	44.543	25.443	44.543	1	S	ESSFSQEVAREQQPTSASERQTPQAPQSPRR	X;X;X;X;X;X;X;X;X;X;X;X;X;X;X;Phospho (STY);X;X;X;X;X;X;X;X;X;X;X;Phospho (STY);X;X;X	XXXXXXXXXXPPPPPPPPPPXXXXXXXXXXX	EQQPT(0.143)S(0.648)AS(0.209)ER	EQQPT(-6.57)S(4.92)AS(-4.92)ER	6	2	-0.50059	0	0	0	0	0	0	0	0	0	0	0	0	0	0	0	570010	762540	361340	2129	2129	713	774	9887;9888;9889	10478	9887	10478	Service_Sonenberg_150119_17
F6ZDS4	2141	F6ZDS4	F6ZDS4	Nucleoprotein TPR	Tpr		0.999986	48.4592	0.00158378	71.085	56.294	64.121	1	S	QPTSASERQTPQAPQSPRRPPHPLPPRLTIH	X;X;X;Phospho (STY);X;X;X;X;X;X;X;X;X;X;X;Phospho (STY);X;X;X;X;X;X;X;X;X;X;X;X;X;X;X	XXXXXXXXPPPPPPPPPPXXXXXXXXXXXXX	QTPQAPQS(1)PR	QT(-48.46)PQAPQS(48.46)PR	8	2	-0.0054582	15993000	5386900	9800800	23106000	13221000	9624400	21308000	4238800	12731000	20792000	15226000	6879000	6981500	9772900	7331900	14302000	17482000	11856000	2141	2141	2020	2223	28691;28692;28693;28694;28695;28696;28697;28698;28699;28700;28701;28702;28703;28704;28705;28706;28707;28708;28709;28710;28711	28122;28123;28124;28125;28126;28127;28128;28129;28130;28131;28132;28133;28134;28135;28136;28137;28138;28139;28140;28141;28142;28143;28144;28145;28146;28147;28148;28149;28150;28151;28152;28153;28154;28155;28156;28157;28158;28159;28160;28161;28162;28163;28164;28165;28166	28709	28164	Service_Sonenberg_150119_18
G5E829	1178	G5E829	G5E829	Plasma membrane calcium-transporting ATPase 1	Atp2b1		0.89282	9.25446	0.0128612	45.126	27.307	45.126	1	S	DDTDAEDDAPTKRNSSPPPSPNKNNNAVDSG	X;X;X;X;X;X;X;X;X;X;X;X;X;X;X;Phospho (STY);X;X;X;X;X;X;X;X;X;X;X;X;X;X;X	XXXXXXXXXXXXXPPPPPPPPPPXXXXXXXX	NS(0.106)S(0.893)PPPS(0.001)PNK	NS(-9.25)S(9.25)PPPS(-28.8)PNK	3	2	-0.61168	0	0	0	0	0	0	0	0	0	0	0	0	0	0	0	0	0	0	1178	1178	1877	2064	26863	26623	26863	26623	Service_Sonenberg_150119_3
G5E870	1111	G5E870	G5E870	E3 ubiquitin-protein ligase TRIP12	Trip12		1	65.7776	8.71382e-07	107.12	90.498	107.12	1	S	EPARTAGVSGLARAASKDTISNNREKIKGWI	X;X;X;X;X;X;X;X;X;X;X;X;X;X;X;Phospho (STY);X;X;X;X;X;X;X;X;X;X;X;X;X;X;X	XXXXXXXXXXXXXPPPPPPPPPPPXXXXXXX	AAS(1)KDTISNNR	AAS(65.78)KDT(-65.78)IS(-81.7)NNR	3	2	0.62944	0	0	0	0	0	992620	2894300	816090	1922300	4671900	1651100	1523600	1312100	2417700	1430400	1452000	2525700	869610	1111	1111	20	21	249;250;251;252;253;254;255;256;257;258;259;260;261;262	311;312;313;314;315;316;317;318;319;320	252	315	Service_Sonenberg_150119_10
G5E870	1460	G5E870	G5E870	E3 ubiquitin-protein ligase TRIP12	Trip12		0.756569	5.18327	0.00080094	90.653	64.536	83.226	1	S	VGGKRGRAQTAPTKTSPRNAKKHDELWHDGV	X;X;X;X;X;X;X;X;X;Phospho (STY);X;X;X;X;X;Phospho (STY);X;X;X;X;X;X;X;X;X;X;X;X;X;X;X	XXXXXXXPPPPPPPPPPPXXXXXXXXXXXXX	AQTAPT(0.014)KT(0.229)S(0.757)PR	AQT(-37.56)APT(-17.35)KT(-5.18)S(5.18)PR	9	2	-0.45045	0	0	0	0	0	0	0	0	0	35907000	11076000	0	0	13536000	0	0	0	0	1460	1460	233	254;255	3397;3407;3409;3412;3414	3609;3628;3631;3634;3637;3638	3412	3634	Service_Sonenberg_150119_13
G5E870	310	G5E870	G5E870	E3 ubiquitin-protein ligase TRIP12	Trip12		0.557177	0.998164	0.000245648	52.79	44.06	41.348	1	S	LQAKLASLRKSTKKRSESPPAELPSLRRSTR	X;X;X;X;X;X;X;X;X;X;X;X;X;X;X;Phospho (STY);X;X;X;X;X;X;X;X;X;X;X;X;X;X;X	XXXXXXXXXXXXXPPPPPPPPPPPPPPXXXX	KRS(0.557)ES(0.443)PPAELPSLR	KRS(1)ES(-1)PPAELPS(-40.08)LR	3	3	0.25979	0	0	2642200	1015400	1341700	1081700	0	0	0	900450	467760	0	698670	865890	0	0	0	907670	310	310	1451;2463	1575;2706	20646;35439;35440;35441;35442;35443;35444;35445;35446;35447	21134;35408	20646	21134	Service_Sonenberg_150119_7
G5E870	312	G5E870	G5E870	E3 ubiquitin-protein ligase TRIP12	Trip12		0.82937	6.87095	8.98951e-05	52.79	44.06	40.066	1	S	AKLASLRKSTKKRSESPPAELPSLRRSTRQK	X;X;X;X;X;X;X;X;X;X;X;X;X;X;X;Phospho (STY);X;X;X;X;X;X;X;X;X;X;X;X;X;X;X	XXXXXXXXXXXPPPPPPPPPPPPPPXXXXXX	S(0.17)ES(0.829)PPAELPSLR	S(-6.87)ES(6.87)PPAELPS(-37.2)LR	3	2	0.98932	480020	367550	0	217950	0	330020	0	375060	291090	436750	0	0	176220	177140	244960	0	245860	570190	312	312	1451;2463	1575;2706	20645;20647;20648;20649;20650;20651;20652;20653;20654;20655;20656;20657;35438;35439;35440;35441;35442;35443;35444;35445;35446;35447	21133;21135;21136;35407;35408	35438	35407	Service_Sonenberg_150119_1
G5E870	340	G5E870	G5E870	E3 ubiquitin-protein ligase TRIP12	Trip12		1	72.2748	0.00515388	72.275	22.831	72.275	1	S	RQKTTGSCASTSRRGSGLGKRGAAEARRQEK	X;X;X;X;X;X;X;X;X;X;X;X;X;X;X;Phospho (STY);X;X;X;X;X;X;X;X;X;X;X;X;X;X;X	XXXXXXXXXXXXXPPPPPPPPXXXXXXXXXX	RGS(1)GLGKR	RGS(72.27)GLGKR	3	2	0.48348	1077400	0	0	4889400	0	0	1767500	0	998950	6818500	4556200	2291400	1196500	1136500	1022900	2649000	4693100	2001500	340	340	2111	2319	30027;30028;30029;30030;30031;30032;30033;30034;30035;30036;30037;30038;30039;30040;30041;30042;30043;30044;30045;30046	29440;29441;29442;29443;29444;29445;29446;29447	30034	29447	Service_Sonenberg_150119_17
G5E870	77	G5E870	G5E870	E3 ubiquitin-protein ligase TRIP12	Trip12		0.997648	26.875	0.00186907	79.146	60.415	69.998	1	S	QVPKKDNSRGVKRSASPDYNRTNSPSSAKKP	X;X;X;X;X;X;X;X;X;X;X;X;X;X;X;Phospho (STY);X;X;X;X;X;X;X;X;X;X;X;X;X;X;X	XXXXXXXXXXXXPPPPPPPPPXXXXXXXXXX	S(0.002)AS(0.998)PDYNR	S(-26.87)AS(26.87)PDY(-35.17)NR	3	2	-0.50907	4941300	825390	7910900	4141500	3449600	1715800	6965900	980310	4979700	6904500	3137700	2727500	4319000	4922100	3363100	3658300	4744300	2168000	77	77	2275;2395	2499;2629	32422;32423;32424;32425;32426;32427;32428;32429;32430;32431;32432;34298;34299;34300;34301;34302;34303;34304;34305;34306;34307;34308;34309;34310;34311;34312;34313;34314;34315	31942;31943;31944;31945;31946;31947;31948;31949;34122;34123;34124;34125;34126;34127;34128;34129;34130;34131;34132;34133;34134;34135;34136;34137;34138;34139;34140	34310	34140	Service_Sonenberg_150119_17
G5E870	239	G5E870	G5E870	E3 ubiquitin-protein ligase TRIP12	Trip12		0.739651	5.72535	0.0392244	40.994	17.64	40.994		S	QGKDQNKARRSRSASSPSPRRSSREKEQSKT	X;X;X;X;X;X;X;X;X;X;X;X;X;X;X;Phospho (STY);X;X;X;X;X;X;X;X;X;X;X;X;X;X;X	XXXXXXXXXXXXPPPPPPPPXXXXXXXXXXX	S(0.008)AS(0.198)S(0.74)PS(0.054)PR	S(-19.69)AS(-5.73)S(5.73)PS(-11.33)PR	4	2	1.0898	0	553090	0	0	0	0	0	0	1921000	1150300	661460	1035900	547160	0	0	0	0	0	239	239	2401	2638	34554;34555;34556;34557;34558;34559	34535	34554	34535	Service_Sonenberg_150119_12
G5E870	1069	G5E870	G5E870	E3 ubiquitin-protein ligase TRIP12	Trip12		0.798101	6.23634	0.00218203	53.08	30.588	53.08		S	DDKVDNQAKSPTTTQSPKSSFLASLNPKTWG	X;X;X;X;X;X;X;X;X;X;X;X;X;X;X;Phospho (STY);X;X;X;X;X;X;X;X;X;X;X;X;X;X;X	XXXXXXXXXPPPPPPPPPXXXXXXXXXXXXX	SPTT(0.012)T(0.19)QS(0.798)PK	S(-48.67)PT(-34.3)T(-18.33)T(-6.24)QS(6.24)PK	7	2	0.23889	3179100	0	0	0	0	448990	5952800	1007100	4055700	3772800	1693000	1637300	1759200	0	0	505240	565690	591440	1069	1069	2733	3007	39298;39299;39302;39303;39304;39305;39306;39307;39308;39309;39310;39311	39617;39618	39298	39617	Service_Sonenberg_150119_9
O08539	286	O08539	O08539	Myc box-dependent-interacting protein 1	Bin1		0.68911	0.491017	3.4907e-15	48.422	36.681	43.801	2	S	EKQHGSNTFTVKAQPSDNAPEKGNKSPSPPP	X;X;X;X;X;X;X;X;X;X;X;X;X;X;X;Phospho (STY);X;X;X;X;X;X;X;X;X;Phospho (STY);X;Phospho (STY);X;X;X	XXXXXXXXXXXXPPPPPPPPPPPPPPPPPPP	AQPS(0.689)DNAPEKGNKS(0.652)PS(0.652)PPPDGS(0.006)PAATPEIR	AQPS(0.49)DNAPEKGNKS(0)PS(0)PPPDGS(-22.03)PAAT(-38.64)PEIR	4	3	0.61275	0	0	0	0	0	0	11787000	3547500	0	0	8100000	0	0	3250800	0	0	0	0	286	286	227	247;248	3314;3315;3317;3318;3319;3320	3522;3523;3525	3317	3525	Service_Sonenberg_150119_16
O08539	296	O08539	O08539	Myc box-dependent-interacting protein 1	Bin1		0.793592	4.67059	3.4907e-15	48.422	36.681	45.125	1;2	S	VKAQPSDNAPEKGNKSPSPPPDGSPAATPEI	X;X;X;X;X;Phospho (STY);X;X;X;X;X;X;X;X;X;Phospho (STY);X;Phospho (STY);X;X;X;X;X;X;X;X;X;X;X;X;X	XXPPPPPPPPPPPPPPPPPPPPPPPPPPPPP	AQPS(0.403)DNAPEKGNKS(0.794)PS(0.794)PPPDGS(0.008)PAAT(0.002)PEIR	AQPS(-4.67)DNAPEKGNKS(4.67)PS(4.67)PPPDGS(-22.15)PAAT(-29.74)PEIR	14	3	0.28877	0	0	0	0	0	0	11787000	3547500	0	0	8100000	0	0	3250800	0	0	0	6434300	296	296	227;963;2727	247;248;1041;3000	3311;3314;3315;3316;3317;3318;3319;3320	3521;3522;3523;3524;3525	3316	3524	Service_Sonenberg_150119_10
O08539	298	O08539	O08539	Myc box-dependent-interacting protein 1	Bin1		0.935382	11.8842	3.63916e-12	46.063	36.575	46.063	1;2	S	AQPSDNAPEKGNKSPSPPPDGSPAATPEIRV	X;X;X;X;X;X;X;X;X;X;X;X;X;Phospho (STY);X;Phospho (STY);X;X;X;X;X;Phospho (STY);X;X;X;X;X;X;X;X;X	PPPPPPPPPPPPPPPPPPPPPPPPPPPPPPX	S(0.061)PS(0.935)PPPDGS(0.003)PAAT(0.001)PEIR	S(-11.88)PS(11.88)PPPDGS(-25.02)PAAT(-29.44)PEIR	3	2	0.65237	0	1173600	681080	0	0	0	11787000	3547500	1511900	1860700	9095700	967350	2191800	4723100	1926200	933840	1774200	1578600	298	298	227;963;2727	247;248;1041;3000	3314;3315;3316;3317;3318;3319;3320;13286;13287;13288;39192;39193;39194;39195;39196;39197;39198;39199;39200;39201;39202;39203	3522;3523;3524;3525;13711;13712;13713;39364;39365	39193	39365	Service_Sonenberg_150119_17
O08539	304	O08539	O08539	Myc box-dependent-interacting protein 1	Bin1		0.993135	22.06	5.71564e-05	45.269	30.797	45.269	2	S	APEKGNKSPSPPPDGSPAATPEIRVNHEPEP	X;X;X;X;X;X;X;X;X;Phospho (STY);X;X;X;X;X;Phospho (STY);X;X;X;X;X;X;X;X;X;X;X;X;X;X;X	XXXXPPPPPPPPPPPPPPPPPPPPXXXXXXX	GNKS(0.463)PS(0.54)PPPDGS(0.993)PAAT(0.004)PEIR	GNKS(-0.67)PS(0.67)PPPDGS(22.06)PAAT(-24.62)PEIR	12	3	0.18091	2296500	0	0	0	0	0	1757100	0	0	0	0	0	1842400	0	0	0	0	0	304	304	227;963;2727	247;248;1041;3000	13286;13287;13288	13711;13712;13713	13287	13712	Service_Sonenberg_150119_7
O08539	321	O08539	O08539	Myc box-dependent-interacting protein 1	Bin1		0.452176	0	9.0901e-05	49.559	38.504	49.559		S	AATPEIRVNHEPEPASGASPGATIPKSPSQL	X;X;X;X;X;X;X;X;X;X;X;X;X;X;X;Phospho (STY);X;X;X;X;X;X;X;X;X;X;X;X;X;X;X	XXXXXXXPPPPPPPPPPPPPPPPPPPXXXXX	VNHEPEPAS(0.452)GAS(0.452)PGAT(0.096)IPK	VNHEPEPAS(0)GAS(0)PGAT(-6.75)IPK	9	2	0.57986	0	0	0	0	0	0	0	0	0	0	0	0	0	0	0	0	0	0	321	321	3347	3681			48411	48810	Service_Sonenberg_150119_18
O08539	324	O08539	O08539	Myc box-dependent-interacting protein 1	Bin1		0.770184	5.85331	4.99142e-05	49.559	38.504	40.986	1	S	PEIRVNHEPEPASGASPGATIPKSPSQLRKG	X;X;X;X;X;X;X;X;X;X;X;X;X;X;X;Phospho (STY);X;X;X;X;X;X;X;X;X;X;X;X;X;X;X	XXXXPPPPPPPPPPPPPPPPPPPXXXXXXXX	VNHEPEPAS(0.2)GAS(0.77)PGAT(0.03)IPK	VNHEPEPAS(-5.85)GAS(5.85)PGAT(-14.14)IPK	12	3	2.3189	0	0	0	0	0	0	0	3138200	0	0	0	2051800	0	0	0	0	4001100	0	324	324	3347	3681	48410;48412;48413	48809	48410	48809	Service_Sonenberg_150119_8
O08550	849	O08550	O08550	Histone-lysine N-methyltransferase 2B	Kmt2b		0.997746	26.4615	0.000283281	40.085	28.108	40.085	1	S	AVGTVKQTPDRGCVRSEDESMEAKRDRASGP	X;X;X;X;X;X;X;X;X;X;X;X;X;X;X;Phospho (STY);X;X;X;X;X;X;X;X;X;X;X;X;X;X;X	XXXXXXXXXXXPPPPPPPPPPPPPPXXXXXX	GCVRS(0.998)EDES(0.002)MEAKR	GCVRS(26.46)EDES(-26.46)MEAKR	5	3	-0.8846	900080	0	0	0	0	0	1711300	0	477780	0	0	0	0	1023000	0	348070	0	0	849	849	860	934	12016;12017;12018;12019;12020	12545	12016	12545	Service_Sonenberg_150119_7
O08553	518	O08553	O08553	Dihydropyrimidinase-related protein 2	Dpysl2		0.510963	4.15298	1.97035e-05	68.972	42.96	43.316	2	S	VCEVSVTPKTVTPASSAKTSPAKQQAPPVRN	X;X;X;X;X;X;X;X;X;X;X;Phospho (STY);X;X;X;Phospho (STY);X;X;X;X;X;X;X;X;X;X;X;X;X;X;X	XXXXXXXXXPPPPPPPPPPPPPPXXXXXXXX	T(0.052)VT(0.947)PAS(0.197)S(0.511)AKT(0.158)S(0.136)PAK	T(-13.14)VT(13.14)PAS(-4.15)S(4.15)AKT(-5.2)S(-5.88)PAK	7	2	-0.29279	0	0	0	0	0	0	0	0	0	0	0	0	0	0	0	0	1313700	0	518	518	3250;3251	3573;3574;3575	47074	47706	47074	47706	Service_Sonenberg_150119_17
O08553	522	O08553	O08553	Dihydropyrimidinase-related protein 2	Dpysl2		0.789564	5.90236	6.06497e-18	84.046	58.034	71.656	2	S	SVTPKTVTPASSAKTSPAKQQAPPVRNLHQS	X;X;X;X;X;X;X;Phospho (STY);X;X;X;X;X;X;X;Phospho (STY);X;X;X;X;X;X;X;X;X;X;X;X;X;X;X	XXXXXPPPPPPPPPPPPPPPPPPPPPXXXXX	T(0.121)VT(0.852)PAS(0.016)S(0.017)AKT(0.205)S(0.79)PAKQQAPPVR	T(-8.54)VT(8.54)PAS(-18.39)S(-17.91)AKT(-5.9)S(5.9)PAKQQAPPVR	11	3	0.81978	0	2646300	6322000	0	0	0	0	1226100	1272300	2027300	803850	0	1885300	2897100	2489300	748030	0	0	522	522	3250;3251	3573;3574;3575	47065;47068;47069;47071;47072;47073;47076;47077;47078;47079;47096;47097;47099;47100;47101;47102;47103	47695;47698;47699;47700;47702;47703;47704;47705;47710;47711;47712;47714	47097	47711	Service_Sonenberg_150119_8
O08585	104	O08585	O08585	Clathrin light chain A	Clta		0.999987	48.7229	0.000744955	82.954	40.793	82.954	1	S	PTDSYAAISEVDRLQSEPESIRKWREEQTER	X;X;X;X;X;X;X;X;X;X;X;X;X;X;X;Phospho (STY);X;X;X;X;X;X;X;X;X;X;X;X;X;X;X	XXXXXXXXXXXXXPPPPPPPPPPXXXXXXXX	LQS(1)EPESIRK	LQS(48.72)EPES(-48.72)IRK	3	2	-0.58803	0	0	0	0	616050	1764500	298530	0	0	2034700	3212200	1872700	0	0	0	1412500	3147700	2398600	104	104	1637	1777	23246;23247;23248;23249;23250;23251;23252;23253;23254	23464;23465;23466;23467;23468;23469	23246	23464	Service_Sonenberg_150119_10
O08648	1241	O08648	O08648	Mitogen-activated protein kinase kinase kinase 4	Map3k4		0.75852	6.18423	8.3567e-07	65.47	53.185	65.47	1	S	SIAAELQFRSLSRHSSPTEERDEPAYPRSDS	X;X;X;X;X;X;X;X;X;X;X;X;X;X;X;Phospho (STY);X;X;X;X;X;X;X;X;X;X;X;X;X;X;X	XXXXXXXXXXXXXPPPPPPPPPPPPPPPXXX	HS(0.183)S(0.759)PT(0.059)EERDEPAYPR	HS(-6.18)S(6.18)PT(-11.1)EERDEPAY(-59.8)PR	3	3	-0.082294	0	0	0	0	0	1822400	0	1543300	0	0	0	0	0	0	1936800	0	0	2153900	1241	1241	1149	1247	15999;16000;16001;16002	16395;16396;16397	15999	16395	Service_Sonenberg_150119_6
O08715	101	O08715	O08715	A-kinase anchor protein 1, mitochondrial	Akap1		0.333317	0	0.00018087	46.702	28.338	46.702		S	TEPLALPRTRQVRRRSESSGNLPSVADTRSQ	X;X;X;X;X;X;X;X;X;X;X;X;X;X;X;Phospho (STY);X;X;X;X;X;X;X;X;X;X;X;X;X;X;X	XXXXXXXXXXXXXPPPPPPPPPPPPPPPPXX	RRS(0.333)ES(0.333)S(0.333)GNLPSVADTR	RRS(0)ES(0)S(0)GNLPS(-39.26)VADT(-46.08)R	3	3	-0.65418	0	0	0	0	0	0	0	0	0	0	0	0	0	0	0	0	0	0	101	101	2261	2484			32202	31656	Service_Sonenberg_150119_9
O08715	103	O08715	O08715	A-kinase anchor protein 1, mitochondrial	Akap1		0.363443	0	0.000167797	47.088	29.836	47.088		S	PLALPRTRQVRRRSESSGNLPSVADTRSQPG	X;X;X;X;X;X;X;X;X;X;X;X;X;X;X;Phospho (STY);X;X;X;X;X;X;X;X;X;X;X;X;X;X;X	XXXXXXXXXXXPPPPPPPPPPPPPPPPXXXX	RRS(0.273)ES(0.363)S(0.363)GNLPSVADTR	RRS(-1.24)ES(0)S(0)GNLPS(-33.07)VADT(-40.52)R	5	3	-0.86856	0	0	0	0	0	0	0	0	0	0	0	0	0	0	0	0	0	0	103	103	2261	2484			32201	31655	Service_Sonenberg_150119_7
O08715	104	O08715	O08715	A-kinase anchor protein 1, mitochondrial	Akap1		0.363443	0	0.000167797	47.088	29.836	47.088		S	LALPRTRQVRRRSESSGNLPSVADTRSQPGP	X;X;X;X;X;X;X;X;X;X;X;X;X;X;X;X;X;X;X;X;X;X;X;X;X;X;X;X;X;X;X	XXXXXXXXXXXXXXXXXXXXXXXXXXXXXXX	RRS(0.273)ES(0.363)S(0.363)GNLPSVADTR	RRS(-1.24)ES(0)S(0)GNLPS(-33.07)VADT(-40.52)R	6	3	-0.86856	0	0	0	0	0	0	0	0	0	0	0	0	0	0	0	0	0	0	104	104	2261	2484			32201	31655	Service_Sonenberg_150119_7
O08784	794	O08784	O08784	Treacle protein	Tcof1		0.999988	49.1249	0.00140408	85.554	67.745	64.224	1	S	GKTSQVRAASAPAKESPKKGAHPGTPGKTGS	X;X;X;X;X;X;X;X;X;X;X;X;X;X;X;Phospho (STY);X;X;X;X;X;X;X;X;X;X;X;X;X;X;X	XXXXXXXPPPPPPPPPPPPXXXXXXXXXXXX	AASAPAKES(1)PK	AAS(-49.12)APAKES(49.12)PK	9	2	0.99268	4377900	7206900	0	0	5038800	5251800	7863600	5090800	2451800	8954600	3511000	1599800	0	12384000	3003300	700080	1456300	1882200	794	794	16;17	17;18	192;193;194;195;196;197;198;199;200;201;202;203;204;205;206;207;208;209;210;211;212;213;214;215;216;217;218	258;259;260;261;262;263;264;265;266;267;268;269;270;271;272;273;274;275;276;277;278;279;280	198	266	Service_Sonenberg_150119_12
O08784	918	O08784	O08784	Treacle protein	Tcof1		0.999763	37.045	0.00041222	54.784	39.523	54.784	1	S	LRTSVTTPAALSRAASQPSKSEQSSRMPKGK	X;X;X;X;X;X;X;X;X;X;X;X;X;X;X;Phospho (STY);X;X;X;X;X;X;X;X;X;X;X;X;X;X;X	XXXXXXXXXXXXXPPPPPPPPPPPPPXXXXX	AAS(1)QPSKSEQSSR	AAS(37.04)QPS(-37.04)KS(-45.3)EQS(-53.16)S(-53.16)R	3	2	-0.038236	0	0	0	0	0	0	0	0	0	0	0	1467300	0	0	0	1054000	0	0	918	918	25	27	327;328	420	327	420	Service_Sonenberg_150119_12
O08784	1216	O08784	O08784	Treacle protein	Tcof1		0.993133	21.6041	1.1908e-05	85.006	71.043	78.932	1	S	NKKKKEQPVPRASAVSPEKAPMTSKAKSKLD	X;X;X;X;X;X;X;X;X;X;X;X;X;X;X;Phospho (STY);X;X;X;X;X;X;X;X;X;X;X;X;X;X;X	XXXXXXXXXXXPPPPPPPPPPPPPPXXXXXX	AS(0.007)AVS(0.993)PEKAPMTSK	AS(-21.6)AVS(21.6)PEKAPMT(-56.33)S(-62.5)K	5	2	-0.078608	3446500	3202000	3006300	0	3266300	2218300	3831600	3285400	5171000	4386300	5577100	2678000	2149200	0	2007800	3621700	0	2309400	1216	1216	256	281	3818;3819;3820;3821;3822;3823;3824;3825;3826;3827;3828;3829;3830;3831;3832;3833;3834;3835;3836;3837;3838;3839;3840;3841;3842;3843	4059;4060;4061;4062;4063;4064;4065;4066;4067;4068;4069;4070;4071;4072	3819	4060	Service_Sonenberg_150119_1
O08784	1303	O08784	O08784	Treacle protein	Tcof1		0.99936	31.9323	0.00203811	76.815	54.119	76.815	1	S	KEKKKGKKSLAKDSASPIQKKKKKKKKSAEP	X;X;X;X;X;X;X;X;X;X;X;X;X;X;X;Phospho (STY);X;X;X;X;X;X;X;X;X;X;X;X;X;X;X	XXXXXXXXXXXXPPPPPPPPPXXXXXXXXXX	DS(0.001)AS(0.999)PIQKK	DS(-31.93)AS(31.93)PIQKK	4	2	-0.30498	14577000	0	3282800	12896000	6901500	6519200	15838000	7482800	15544000	8012600	12891000	0	5406700	13813000	9390900	6554300	0	319260	1303	1303	507;508	554;555	7082;7083;7084;7085;7086;7087;7088;7089;7090;7091;7092;7093;7094;7095;7096;7097;7098;7099;7100;7101;7102;7103;7104;7105;7106;7107;7108;7109;7110;7111;7112	7911;7912;7913;7914;7915;7916;7917;7918;7919;7920;7921;7922;7923;7924;7925;7926;7927;7928;7929	7094	7923	Service_Sonenberg_150119_3
O08784	1242	O08784	O08784	Treacle protein	Tcof1		1	45.653	4.14014e-07	123.26	81.829	45.653	1	S	KSKLDKGSAGGKGKGSPGPQGAKEKPDGELL	X;X;X;X;X;X;X;X;X;X;X;X;X;X;X;Phospho (STY);X;X;X;X;X;X;X;X;X;X;X;X;X;X;X	XXXXXXXXXXXXPPPPPPPPPPPXXXXXXXX	GKGS(1)PGPQGAK	GKGS(45.65)PGPQGAK	4	2	-1.0473	8982400	11587000	11537000	6488100	7481800	0	9950600	4115000	8423400	9990800	10490000	10131000	6046800	6627500	2144500	2289600	3133200	2224900	1242	1242	929	1006	12978;12979;12980;12981;12982;12983;12984;12985;12986;12987;12988;12989;12990;12991;12992;12993;12994	13510;13511;13512;13513;13514;13515;13516;13517;13518;13519;13520	12988	13520	Service_Sonenberg_150119_13
O08784	1191	O08784	O08784	Treacle protein	Tcof1		1	60.5489	0.00031244	65.563	43.804	60.549	1	S	EAIKESGKKSQKRKLSGDLEAGAPKNKKKKE	X;X;X;X;X;X;X;X;X;X;X;X;X;X;X;Phospho (STY);X;X;X;X;X;X;X;X;X;X;X;X;X;X;X	XXXXXXXXXXXXXPPPPPPPPPPPPXXXXXX	KLS(1)GDLEAGAPK	KLS(60.55)GDLEAGAPK	3	3	-0.33438	624290	687940	245930	431630	1110000	835340	362330	411710	601040	459180	424070	417470	390860	174120	296420	941010	1112100	728290	1191	1191	1392	1510	19805;19806;19807;19808;19809;19810;19811;19812;19813;19814;19815;19816;19817;19818;19819;19820;19821;19822;19823;19824;19825;19826;19827;19828;19829;19830;19831;19832;19833;19834;19835	20230;20231;20232;20233;20234;20235;20236;20237;20238;20239;20240;20241;20242;20243;20244;20245;20246;20247;20248;20249;20250;20251;20252	19819	20252	Service_Sonenberg_150119_18
O08784	852	O08784	O08784	Treacle protein	Tcof1		0.499633	0	3.87398e-05	40.349	28.184	40.349		S	SAQAIKSPPVSVNRNSSPAVPAPTPEGVQAV	X;X;X;X;X;X;X;X;X;X;X;X;X;X;X;Phospho (STY);X;X;X;X;X;X;X;X;X;X;X;X;X;X;X	XXXXXXXXXXXXXXPPPPPPPPPPPPPPPPP	NS(0.5)S(0.5)PAVPAPT(0.001)PEGVQAVNTTK	NS(0)S(0)PAVPAPT(-28.91)PEGVQAVNT(-40.35)T(-40.35)K	2	2	0.69511	0	0	0	0	0	0	0	0	0	0	0	0	0	0	0	0	0	0	852	852	1875	2062			26835	26602	Service_Sonenberg_150119_2
O08784	853	O08784	O08784	Treacle protein	Tcof1		0.499633	0	3.87398e-05	40.349	28.184	40.349		S	AQAIKSPPVSVNRNSSPAVPAPTPEGVQAVN	X;X;X;X;X;X;X;X;X;X;X;X;X;X;X;X;X;X;X;X;X;X;X;X;X;X;X;X;X;X;X	XXXXXXXXXXXXXXXXXXXXXXXXXXXXXXX	NS(0.5)S(0.5)PAVPAPT(0.001)PEGVQAVNTTK	NS(0)S(0)PAVPAPT(-28.91)PEGVQAVNT(-40.35)T(-40.35)K	3	2	0.69511	0	0	0	0	0	0	0	0	0	0	0	0	0	0	0	0	0	0	853	853	1875	2062			26835	26602	Service_Sonenberg_150119_2
O08808	22	O08808	O08808	Protein diaphanous homolog 1	Diaph1		0.999792	36.8281	0.00207757	47.204	38.82	47.204		S	GLGPGRGTRDKKKGRSPDELPATGGDGGKHK	X;X;X;X;X;X;X;X;X;X;X;X;X;X;X;Phospho (STY);X;X;X;X;X;X;X;X;X;X;X;X;X;X;X	XXXXXXXXXXXXXPPPPPPPPPPPPPPPPXX	GRS(1)PDELPATGGDGGK	GRS(36.83)PDELPAT(-36.83)GGDGGK	3	2	0.11161	0	0	0	0	0	0	0	0	0	0	0	0	0	0	0	0	0	428210	22	22	996	1076	13659	14024	13659	14024	Service_Sonenberg_150119_18
O08856	299	O08856	O08856	RNA polymerase II elongation factor ELL	Ell		0.486184	0	7.29506e-06	51.645	40.334	49.638		S	MLMRKLCQPQNATTDSSPPREHGRSASPSQK	X;X;X;X;X;X;X;X;X;X;X;X;X;X;X;Phospho (STY);X;X;X;X;X;X;X;X;X;X;X;X;X;X;X	XXXXPPPPPPPPPPPPPPPPPPPPXXXXXXX	KLCQPQNAT(0.005)T(0.022)DS(0.486)S(0.486)PPREHGR	KLCQPQNAT(-19.61)T(-13.38)DS(0)S(0)PPREHGR	12	4	-0.044499	0	0	0	0	0	0	0	0	0	0	0	0	0	0	0	0	0	0	299	299	1369	1487			19518	19973	Service_Sonenberg_150119_8
O08856	300	O08856	O08856	RNA polymerase II elongation factor ELL	Ell		0.793612	5.98506	1.7374e-15	73.831	64.349	53.266	1	S	LMRKLCQPQNATTDSSPPREHGRSASPSQKR	X;X;X;X;X;X;X;X;X;X;X;X;X;X;X;Phospho (STY);X;X;X;X;X;X;X;X;X;X;X;X;X;X;X	XXXPPPPPPPPPPPPPPPPPPPPXXXXXXXX	KLCQPQNAT(0.002)T(0.005)DS(0.2)S(0.794)PPREHGR	KLCQPQNAT(-26.77)T(-22.29)DS(-5.99)S(5.99)PPREHGR	13	4	-0.026793	5185100	1798300	0	0	0	0	0	0	0	8597700	0	612010	5514400	0	4461900	3896200	4783000	0	300	300	1369	1487	19515;19520;19522;19523;19524;19525;19526;19527	19965;19966;19967;19975	19520	19975	Service_Sonenberg_150119_10
O08983	282	O08983	O08983	Hermansky-Pudlak syndrome 1 protein homolog	Hps1		0.908712	12.8385	0.00566574	48.998	21.226	44.024	1	S	PKSSQNIPVQQARSQSTSVPTRSSRETDTDS	X;X;X;X;X;X;X;X;X;X;X;X;X;X;X;Phospho (STY);X;X;X;X;X;X;X;X;X;X;X;X;X;X;X	XXXXXXXXXXXXXPPPPPPPPPXXXXXXXXX	S(0.032)QS(0.909)T(0.047)S(0.011)VPT(0.001)R	S(-14.55)QS(12.84)T(-12.84)S(-18.98)VPT(-31.41)R	3	2	0.93069	1203700	0	0	4106200	2065300	1804600	1356700	0	0	935130	587350	621860	0	0	0	3121200	3406200	0	282	282	2769	3049	39828;39829;39830;39831;39832;39833;39834;39835;39836;39837;39838	40152;40153;40154	39829	40153	Service_Sonenberg_150119_16
O09000	720	O09000	O09000	Nuclear receptor coactivator 3	Ncoa3		1	44.8204	0.0333311	44.82	25.563	44.82	1	S	STASCGEGTTRQEQLSPKKKENNALLRYLLD	X;X;X;X;X;X;X;X;X;X;X;X;X;X;X;Phospho (STY);X;X;X;X;X;X;X;X;X;X;X;X;X;X;X	XXXXXXXXXXXPPPPPPPXXXXXXXXXXXXX	QEQLS(1)PK	QEQLS(44.82)PK	5	2	0.30362	3927900	908960	0	0	0	2441700	4587800	1222900	3238500	3594800	2721000	1626200	3334800	3767600	2507000	1975700	4171800	1593900	720	720	1947	2143	27759;27760;27761;27762;27763;27764;27765;27766;27767;27768;27769;27770;27771;27772;27773	27390	27759	27390	Service_Sonenberg_150119_2
O09000	215	O09000	O09000	Nuclear receptor coactivator 3	Ncoa3		0.827121	6.7996	0.000513389	48.177	39.578	48.177		S	RMLMKTHDILEDVNASPETRQRYETMQCFAL	X;X;X;X;X;X;X;X;X;X;X;X;X;X;X;Phospho (STY);X;X;X;X;X;X;X;X;X;X;X;X;X;X;X	XXXXXPPPPPPPPPPPPPPPXXXXXXXXXXX	THDILEDVNAS(0.827)PET(0.173)R	T(-41.94)HDILEDVNAS(6.8)PET(-6.8)R	11	2	1.5813	504330	328030	232380	223840	273410	354850	431550	308150	304890	349830	189800	263010	291090	124520	244570	0	333000	260020	215	215	3084	3392	44608;44609;44610;44611;44612;44613;44614;44615;44616;44617;44618;44619;44620;44621;44622;44623;44624	45570	44608	45570	Service_Sonenberg_150119_1
O09044	20	O09044	O09044	Synaptosomal-associated protein 23	Snap23		0.994253	25.692	2.41471e-19	128.31	118.78	128.31	1	S	SPEEVQLRAHQVTDESLESTRRILGLAIESQ	X;X;X;X;X;X;X;X;X;X;X;X;X;X;X;Phospho (STY);X;X;X;X;X;X;X;X;X;X;X;X;X;X;X	XXXXXXXXPPPPPPPPPPPPPPXXXXXXXXX	AHQVTDES(0.994)LES(0.003)T(0.003)R	AHQVT(-34.12)DES(25.69)LES(-25.69)T(-25.69)R	8	2	0.50414	0	0	1157600	2382600	2187100	1402000	2767900	913310	1731400	2983800	1981200	1409500	2037200	0	1220500	0	0	1699700	20	20	115;116	121;122	1628;1629;1630;1631;1632;1633;1634;1635;1637;1638;1639;1640;1641;1642;1643;1644;1648;1649;1650;1652;1657;1658;1659;1660;1662;1663	1765;1766;1767;1768;1769;1770;1771;1772;1773;1774;1775;1777;1778;1779;1780;1781;1786;1787;1788;1789;1790;1793;1800;1801;1802;1803;1804	1634	1773	Service_Sonenberg_150119_10
O09044	23	O09044	O09044	Synaptosomal-associated protein 23	Snap23		0.446541	0	1.93703e-11	106.32	92.458	106.32		S	EVQLRAHQVTDESLESTRRILGLAIESQDAG	X;X;X;X;X;X;X;X;X;X;X;X;X;X;X;Phospho (STY);X;X;X;X;X;X;X;X;X;X;X;X;X;X;X	XXXXXPPPPPPPPPPPPPPXXXXXXXXXXXX	AHQVTDES(0.107)LES(0.447)T(0.447)RR	AHQVT(-52.23)DES(-6.21)LES(0)T(0)RR	11	2	0.13264	0	0	0	0	0	0	0	0	0	0	0	0	0	0	0	0	0	0	23	23	115;116	121;122			1655	1797	Service_Sonenberg_150119_10
O35071	1031	O35071	O35071	Kinesin-like protein KIF1C	Kif1c		1	70.3482	0.000222528	127.51	93.262	126.71	1	S	RRPPSPRRPHRSRRNSLDGGSRSRGGGSTQP	X;X;X;X;X;X;X;X;X;X;X;X;X;X;X;Phospho (STY);X;X;X;X;X;X;X;X;X;X;X;X;X;X;X	XXXXXXXXXXXXXPPPPPPPPPXXXXXXXXX	RNS(1)LDGGSR	RNS(70.35)LDGGS(-70.35)R	3	2	-0.99018	14989000	4859300	5095800	18282000	6191700	2438700	20057000	4433400	15312000	16149000	12689000	9226800	0	17004000	11704000	9024200	11069000	6268600	1031	1031	2198	2417	31275;31276;31277;31278;31279;31280;31281;31282;31283;31284;31285;31286;31287;31288;31289;31290;31291	30803;30804;30805;30806;30807;30808;30809;30810;30811;30812;30813;30814;30815;30816;30817;30818;30819;30820;30821;30822;30823;30824	31276	30804	Service_Sonenberg_150119_4
O35126	34	O35126	O35126	Atrophin-1	Atn1		0.999182	33.3208	3.59007e-05	47.175	38.891	47.175	1	S	EAPGPREELRSRGRASPGGVSTSSSDGKAEK	X;X;X;X;X;X;X;X;X;X;X;X;X;X;X;Phospho (STY);X;X;X;X;X;X;X;X;X;X;X;X;X;X;X	XXXXXXXXXXXXPPPPPPPPPPPPPPPPPPP	GRAS(0.999)PGGVSTSSSDGKAEK	GRAS(33.32)PGGVS(-33.32)T(-36.83)S(-42.37)S(-43.58)S(-43.58)DGKAEK	4	3	-0.1459	0	0	0	0	0	1433900	0	0	0	3105200	0	0	0	6554400	0	0	1658800	1121200	34	34	982	1061	13476;13477;13478;13479;13480	13829;13830;13831;13832;13833	13476	13829	Service_Sonenberg_150119_6
O35216	15	O35216	O35216	Histone H3-like centromeric protein A	Cenpa		0.985488	18.3194	1.22308e-07	123.26	73.905	123.26	1	S	_MGPRRKPQTPRRRPSSPAPGPSRQSSSVGS	X;X;X;X;X;X;X;X;X;X;X;X;X;X;X;Phospho (STY);X;X;X;X;X;X;X;X;X;X;X;X;X;X;X	XXXXXXXXXXXXXPPPPPPPPPPPXXXXXXX	RPS(0.985)S(0.015)PAPGPSR	RPS(18.32)S(-18.32)PAPGPS(-83.09)R	3	2	0.89518	0	0	0	1346700	0	0	0	1320800	2682700	0	1281300	733630	0	0	0	903380	1635500	613220	15	15	2232	2453	31786;31789;31790;31795;31796;31797;31798;31799	31260;31264;31265;31266	31790	31266	Service_Sonenberg_150119_9
O35216	16	O35216	O35216	Histone H3-like centromeric protein A	Cenpa		0.873201	10.1119	0.000272662	91.62	52.036	52.576	1	S	MGPRRKPQTPRRRPSSPAPGPSRQSSSVGSQ	X;X;X;X;X;X;X;X;X;X;X;X;X;X;X;Phospho (STY);X;X;X;X;X;X;X;X;X;X;X;X;X;X;X	XXXXXXXXXXXXPPPPPPPPPPPXXXXXXXX	RPS(0.085)S(0.873)PAPGPS(0.042)R	RPS(-10.11)S(10.11)PAPGPS(-13.21)R	4	2	0.16376	3281600	1519600	0	0	0	739440	2990900	0	0	1115900	0	0	1871400	3262300	1341700	0	0	0	16	16	2232	2453	31784;31785;31787;31788;31791;31792;31793;31794	31258;31259;31261;31262;31263;31267;31268;31269;31270;31271	31793	31270	Service_Sonenberg_150119_14
O35245	806	O35245	O35245	Polycystin-2	Pkd2		0.531632	0.552262	0.000499625	41.644	36.753	41.644	1	S	HSSLPRPMSSRSFPRSLDDSEEEDDEDSGHS	X;X;X;X;X;X;X;X;X;X;X;X;X;X;X;Phospho (STY);X;X;X;X;X;X;X;X;X;X;X;X;X;X;X	XXXXXXXXXXXXXXXPPPPPPPPPPPPPPPP	S(0.532)LDDS(0.468)EEEDDEDSGHSSR	S(0.55)LDDS(-0.55)EEEDDEDS(-36.51)GHS(-40.26)S(-40.26)R	1	2	0.15199	0	0	0	0	0	0	0	0	0	0	0	0	0	0	0	0	0	0	806	806	2628	2893	37766	37884	37766	37884	Service_Sonenberg_150119_14
O35245	810	O35245	O35245	Polycystin-2	Pkd2		0.86364	8.02119	2.45599e-11	53.278	43.748	53.278	1	S	PRPMSSRSFPRSLDDSEEEDDEDSGHSSRRR	X;X;X;X;X;X;X;X;X;X;X;X;X;X;X;Phospho (STY);X;X;X;X;X;X;X;X;X;X;X;X;X;X;X	XXXXXXXXXXXPPPPPPPPPPPPPPPPPPXX	S(0.136)LDDS(0.864)EEEDDEDSGHSSR	S(-8.02)LDDS(8.02)EEEDDEDS(-38.19)GHS(-49.94)S(-49.84)R	5	3	0.58627	0	0	0	0	0	0	0	0	0	0	0	0	0	0	0	0	0	0	810	810	2628	2893	37764;37765	37882;37883	37765	37883	Service_Sonenberg_150119_7
O35250	242	O35250	O35250	Exocyst complex component 7	Exoc7		0.207009	0	6.07412e-05	48.656	40.731	48.656		S	LDRSIKGLKEHFRKSSSSSGVPYSPAIPNKR	X;X;X;X;X;X;X;X;X;X;X;X;X;X;X;Phospho (STY);X;X;X;X;X;X;X;X;X;X;X;X;X;X;X	XXXXXXXXXXXXXPPPPPPPPPPPPPPPPPP	KS(0.17)S(0.207)S(0.207)S(0.207)S(0.207)GVPY(0.001)SPAIPNKR	KS(-0.85)S(0)S(0)S(0)S(0)GVPY(-21.85)S(-28.01)PAIPNKR	3	3	-2.0254	0	0	0	0	0	0	0	0	0	0	0	0	0	0	0	0	0	0	242	242	1474	1601			20999	21537	Service_Sonenberg_150119_18
O35250	243	O35250	O35250	Exocyst complex component 7	Exoc7		0.207009	0	6.07412e-05	48.656	40.731	48.656		S	DRSIKGLKEHFRKSSSSSGVPYSPAIPNKRK	X;X;X;X;X;X;X;X;X;X;X;X;X;X;X;X;X;X;X;X;X;X;X;X;X;X;X;X;X;X;X	XXXXXXXXXXXXXXXXXXXXXXXXXXXXXXX	KS(0.17)S(0.207)S(0.207)S(0.207)S(0.207)GVPY(0.001)SPAIPNKR	KS(-0.85)S(0)S(0)S(0)S(0)GVPY(-21.85)S(-28.01)PAIPNKR	4	3	-2.0254	0	0	0	0	0	0	0	0	0	0	0	0	0	0	0	0	0	0	243	243	1474	1601			20999	21537	Service_Sonenberg_150119_18
O35250	244	O35250	O35250	Exocyst complex component 7	Exoc7		0.207009	0	6.07412e-05	48.656	40.731	48.656		S	RSIKGLKEHFRKSSSSSGVPYSPAIPNKRKD	X;X;X;X;X;X;X;X;X;X;X;X;X;X;X;X;X;X;X;X;X;X;X;X;X;X;X;X;X;X;X	XXXXXXXXXXXXXXXXXXXXXXXXXXXXXXX	KS(0.17)S(0.207)S(0.207)S(0.207)S(0.207)GVPY(0.001)SPAIPNKR	KS(-0.85)S(0)S(0)S(0)S(0)GVPY(-21.85)S(-28.01)PAIPNKR	5	3	-2.0254	0	0	0	0	0	0	0	0	0	0	0	0	0	0	0	0	0	0	244	244	1474	1601			20999	21537	Service_Sonenberg_150119_18
O35250	245	O35250	O35250	Exocyst complex component 7	Exoc7		0.207009	0	6.07412e-05	48.656	40.731	48.656		S	SIKGLKEHFRKSSSSSGVPYSPAIPNKRKDT	X;X;X;X;X;X;X;X;X;X;X;X;X;X;X;X;X;X;X;X;X;X;X;X;X;X;X;X;X;X;X	XXXXXXXXXXXXXXXXXXXXXXXXXXXXXXX	KS(0.17)S(0.207)S(0.207)S(0.207)S(0.207)GVPY(0.001)SPAIPNKR	KS(-0.85)S(0)S(0)S(0)S(0)GVPY(-21.85)S(-28.01)PAIPNKR	6	3	-2.0254	0	0	0	0	0	0	0	0	0	0	0	0	0	0	0	0	0	0	245	245	1474	1601			20999	21537	Service_Sonenberg_150119_18
O35295	6	O35295	O35295	Transcriptional activator protein Pur-beta	Purb		1	42.1063	1.61518e-31	67.799	59.481	42.106	1;2	S	__________MADGDSGSERGGGGGGGGGPG	X;X;X;X;X;X;X;X;X;X;X;X;X;X;X;Phospho (STY);X;Phospho (STY);X;X;X;X;X;X;X;X;X;X;X;X;X	XXXXXXXXXXXPPPPPPPPPPPPPPPPPPPP	ADGDS(1)GS(1)ERGGGGGGGGGPGGFQPAPR	ADGDS(42.11)GS(42.11)ERGGGGGGGGGPGGFQPAPR	5	3	-0.045957	0	11685000	0	0	20978000	16769000	44215000	11350000	0	7056200	0	30558000	7355800	0	9995500	0	0	29141000	6	6	38	40;41	455;456;457;458;459;460;461;462;463;464;465;466;467;468;469	465;466;467;468;469;470;471;472;473;474;475;476;477;478;479;480;481;482;483;484	469	484	Service_Sonenberg_150119_18
O35295	8	O35295	O35295	Transcriptional activator protein Pur-beta	Purb		1	42.1063	1.61518e-31	67.799	59.481	42.106	1;2	S	________MADGDSGSERGGGGGGGGGPGGF	X;X;X;X;X;X;X;X;X;X;X;X;X;Phospho (STY);X;Phospho (STY);X;X;X;X;X;X;X;X;X;X;X;X;X;X;X	XXXXXXXXXPPPPPPPPPPPPPPPPPPPPPP	ADGDS(1)GS(1)ERGGGGGGGGGPGGFQPAPR	ADGDS(42.11)GS(42.11)ERGGGGGGGGGPGGFQPAPR	7	3	-0.045957	0	0	0	0	20978000	16769000	44215000	11350000	0	7056200	0	30558000	7355800	0	9995500	0	0	29141000	8	8	38	40;41	456;457;458;459;460;461;462;463;464;465;466;467;468;469	467;468;469;470;471;472;473;474;475;476;477;478;479;480;481;482;483;484	469	484	Service_Sonenberg_150119_18
O35295	112	O35295	O35295	Transcriptional activator protein Pur-beta	Purb		0.551598	0.908208	3.1079e-38	64.633	58.472	64.633	1	S	DSLGDFIEHYAQLGPSSPEQLAAGAEEGGGP	X;X;X;X;X;X;X;X;X;X;X;X;X;X;X;Phospho (STY);X;X;X;X;X;X;X;X;X;X;X;X;X;X;X	PPPPPPPPPPPPPPPPPPPPPPPPPPPPPPP	DSLGDFIEHY(0.001)AQLGPS(0.552)S(0.448)PEQLAAGAEEGGGPR	DS(-36.42)LGDFIEHY(-28.57)AQLGPS(0.91)S(-0.91)PEQLAAGAEEGGGPR	16	3	0.27175	1861700	0	0	0	0	0	0	0	0	0	0	0	0	0	0	0	0	0	112	112	519	567	7278	8054;8055	7278	8054	Service_Sonenberg_150119_1
O35295	316	O35295	O35295	Transcriptional activator protein Pur-beta	Purb		0.999186	30.8918	4.31825e-82	87.85	74.041	87.85	1	S	KLYERRGGGSGGGDESEGEEVDED_______	X;X;X;X;X;X;X;X;X;X;X;X;X;X;X;Phospho (STY);X;X;X;X;X;X;X;X;X;X;X;X;X;X;X	XXXXXPPPPPPPPPPPPPPPPPPPXXXXXXX	RGGGS(0.001)GGGDES(0.999)EGEEVDED	RGGGS(-30.89)GGGDES(30.89)EGEEVDED	11	2	0.32817	0	0	0	0	0	0	0	0	0	0	0	0	0	0	0	0	0	0	316	316	895;2102	969;2309	12394;29938;29939	12995;29382;29383	29938	29382	Service_Sonenberg_150119_16
O35326	247	O35326	O35326	Serine/arginine-rich splicing factor 5	Srsf5		0.98473	20.2899	0.0156433	48.998	25.009	48.998		S	VPEKSQKRGSSSRSKSPASVDRQRSRSRSRS	X;X;X;X;X;X;X;X;X;X;X;X;X;X;X;Phospho (STY);X;X;X;X;X;X;X;X;X;X;X;X;X;X;X	XXXXXXXXXXXXXPPPPPPPPPXXXXXXXXX	S(0.009)KS(0.985)PAS(0.006)VDR	S(-20.29)KS(20.29)PAS(-22.11)VDR	3	2	-0.63444	0	0	0	0	293800	1223300	3283400	0	0	2400200	2934400	921750	0	0	0	937960	0	0	247	247	2620	2884	37636;37637;37638;37639;37640;37641;37642	37794	37636	37794	Service_Sonenberg_150119_6
O35344	14	O35344	O35344	Importin subunit alpha-4	Kpna3		1	40.8819	0.00602534	60.91	27.648	40.882	1	S	__MAENPGLENHRIKSFKNKGRDVETMRRHR	X;X;X;X;X;X;X;X;X;X;X;X;X;X;X;Phospho (STY);X;X;X;X;X;X;X;X;X;X;X;X;X;X;X	XXXXXXXXXXXXXPPPPPPPXXXXXXXXXXX	IKS(1)FKNK	IKS(40.88)FKNK	3	3	0.08681	361660	238720	0	0	0	247460	0	430280	1552400	1033000	625080	364840	242010	751860	0	749490	763460	381090	14	14	1222	1327	17097;17098;17099;17100;17101;17102;17103;17104;17105;17106;17107;17108;17109	17561;17562	17098	17562	Service_Sonenberg_150119_10
O35345	6	O35345	O35345	Importin subunit alpha-7	Kpna6		0.998737	29.1838	6.5725e-05	55.314	48.624	55.314	1	S	__________METMASPGKDNYRMKSYKNNA	X;X;X;X;X;X;X;X;X;X;X;X;X;X;X;Phospho (STY);X;X;X;X;X;X;X;X;X;X;X;X;X;X;X	XXXXXXXXXXPPPPPPPPPPPPPXXXXXXXX	MET(0.001)MAS(0.999)PGKDNYR	MET(-29.18)MAS(29.18)PGKDNY(-42.36)R	6	2	0.71749	896420	633160	558350	0	0	0	2875000	944970	763300	945410	544560	1411200	0	1127000	0	0	0	0	6	6	1710	1864	24208;24209;24210;24211;24212;24213;24214;24215;24216;24217	24228	24208	24228	Service_Sonenberg_150119_9
O35368	403	O35368	O35368	Interferon-activable protein 203	Ifi203		0.999944	42.4852	0.00733841	49.715	36.043	49.715	1	S	INEGKPLNPDSVRRNSLEPYF__________	X;X;X;X;X;X;X;X;X;X;X;X;X;X;X;Phospho (STY);X;X;X;X;X;X;X;X;X;X;X;X;X;X;X	XXXXXXXXXXXXXPPPPPPPPXXXXXXXXXX	RNS(1)LEPYF	RNS(42.49)LEPY(-42.49)F	3	2	-0.15004	0	0	0	140390	206260	145560	0	0	22546	37558	69872	137710	0	0	0	200770	187370	182710	403	403	2199	2418	31292;31293;31294;31295;31296;31297;31298;31299;31300;31301	30825	31292	30825	Service_Sonenberg_150119_5
O35379	1142	O35379	O35379	Multidrug resistance-associated protein 1	Abcc1		0.998676	28.777	0.0146183	50.372	7.1875	50.372	1	S	QRFYVASSRQLKRLESVSRSPVYSHFNETLL	X;X;X;X;X;X;X;X;X;X;X;X;X;X;X;Phospho (STY);X;X;X;X;X;X;X;X;X;X;X;X;X;X;X	XXXXXXXXXXXXPPPPPPPXXXXXXXXXXXX	RLES(0.999)VS(0.001)R	RLES(28.78)VS(-28.78)R	4	2	0.15227	0	1286800	0	0	0	1314300	0	1113700	0	2056800	1933700	1648100	1465900	1462800	1440600	873320	1823000	661040	1142	1142	2161	2378	30758;30759;30760;30761;30762;30763;30764;30765;30766;30767;30768;30769	30261	30758	30261	Service_Sonenberg_150119_2
O35381;Q64G17	17;17	O35381	O35381	Acidic leucine-rich nuclear phosphoprotein 32 family member A;Putative acidic leucine-rich nuclear phosphoprotein 32 family member C	Anp32a;Anp32c		0.987673	19.0377	0.000110208	79.474	63.845	79.474	1	S	EMDKRIYLELRNRTPSDVKELVLDNCKSIEG	X;X;X;X;X;X;X;X;X;X;X;X;X;X;X;Phospho (STY);X;X;X;X;X;X;X;X;X;X;X;X;X;X;X	XXXXXXXXXXXPPPPPPPPXXXXXXXXXXXX	NRT(0.012)PS(0.988)DVK	NRT(-19.04)PS(19.04)DVK	5	2	-0.20947	6246300	5136500	0	90058000	46711000	59828000	8487300	2613500	6220000	59232000	49752000	33344000	2198700	4139100	3602000	41157000	81667000	60088000	17	17	1858;1859	2043;2044	26539;26540;26541;26546;26549;26550;26551;26553;26554;26555;26557;26558;26560;26561;26562;26563;26564;26566;26568;26569;26571;26573;26574;26576;26578;26580;26581;26582;26583;26584;26585;26586;26587;26588	26365;26366;26367;26368;26369;26374;26377;26379	26540	26367	Service_Sonenberg_150119_5
O35495	119	O35495	O35495	Cyclin-dependent kinase 14	Cdk14		0.822988	7.87176	0.000161549	69.352	48.925	69.352	2	S	KSSSAGKESPKVRRHSSPSSPTSPKFGKADS	X;X;X;X;X;X;X;X;Phospho (STY);X;X;X;X;X;X;Phospho (STY);X;X;X;Phospho (STY);X;X;X;X;X;X;X;X;X;X;X	XXXXXXXXXXXXXPPPPPPPPPPPPXXXXXX	RHS(0.823)S(0.069)PS(0.262)S(0.505)PT(0.301)S(0.04)PK	RHS(7.87)S(-12.4)PS(-4.53)S(2.33)PT(-2.33)S(-11.08)PK	3	2	0.0227	0	0	0	0	0	0	2323000	377330	0	0	0	1104500	0	0	0	0	0	0	119	119	1148;2129	1246;2343;2344	30311;30312;30313	29827;29828	30311	29827	Service_Sonenberg_150119_7
O35495	123	O35495	O35495	Cyclin-dependent kinase 14	Cdk14		0.985616	21.2741	7.42161e-07	113.03	97.693	113.03	1;2	S	AGKESPKVRRHSSPSSPTSPKFGKADSYEKL	X;X;X;X;Phospho (STY);X;X;X;X;X;X;Phospho (STY);X;X;X;Phospho (STY);X;X;X;X;X;X;X;X;X;X;X;X;X;X;X	XXXXXXXXXPPPPPPPPPPPPXXXXXXXXXX	HSSPS(0.006)S(0.986)PT(0.007)S(0.001)PK	HS(-73.85)S(-52.38)PS(-22.11)S(21.27)PT(-21.27)S(-30.07)PK	6	2	0.1625	2670800	0	0	0	0	0	6665600	1195000	2147300	6873500	2926000	2216500	0	0	1253300	636270	804900	442030	123	123	1148;2129	1246;2343;2344	15974;15977;15979;15981;15983;15984;15986;15990;15995;15996;15998;30311;30312;30313	16363;16364;16368;16369;16374;16377;16378;16381;16382;16383;16384;16386;16392;29827;29828	15977	16368	Service_Sonenberg_150119_7
O35495	126	O35495	O35495	Cyclin-dependent kinase 14	Cdk14		0.983155	19.1888	0.000106666	98.182	84.489	89.533	1	S	ESPKVRRHSSPSSPTSPKFGKADSYEKLEKL	X;Phospho (STY);X;X;X;X;X;X;X;X;X;X;X;X;X;Phospho (STY);X;X;X;X;X;X;X;X;X;X;X;X;X;X;X	XXXXXXPPPPPPPPPPPPXXXXXXXXXXXXX	HSSPS(0.003)S(0.002)PT(0.012)S(0.983)PK	HS(-61.25)S(-48.92)PS(-25.31)S(-26.73)PT(-19.19)S(19.19)PK	9	2	-0.19487	4787300	2789300	9684600	0	0	1199500	6907500	1454100	4641600	0	3846600	1725100	3711500	7741300	3097800	786000	0	872620	126	126	1148;2129	1246;2343;2344	15975;15976;15978;15980;15982;15985;15987;15988;15989;15991;15992;15993;15994;15997;30314;30316;30317;30318;30319;30320	16365;16366;16367;16370;16371;16372;16373;16375;16376;16379;16380;16385;16387;16388;16389;16390;16391;16393;16394;29829	15982	16379	Service_Sonenberg_150119_9
O35495	95	O35495	O35495	Cyclin-dependent kinase 14	Cdk14		1	46.8897	1.67777e-09	52.372	47.657	46.89	1	S	FDPFEKPANQVKRVHSENNACINFKSSSAGK	X;X;X;X;X;X;X;X;X;X;X;X;X;X;X;Phospho (STY);X;X;X;X;X;X;X;X;X;X;X;X;X;X;X	XXXXXXXXXXXXPPPPPPPPPPPPPXXXXXX	RVHS(1)ENNACINFK	RVHS(46.89)ENNACINFK	4	3	0.51591	0	1070900	0	3087100	0	3093100	0	1423200	0	3492700	0	0	1625600	769950	1167400	0	0	185190	95	95	2348	2578	33674;33675;33676;33677;33678;33679;33680;33681;33682;33683;33684	33106;33107;33108;33109;33110;33111;33112;33113;33114	33681	33114	Service_Sonenberg_150119_17
O35495	112	O35495	O35495	Cyclin-dependent kinase 14	Cdk14		0.998997	32.4492	2.2362e-06	53.491	44.79	51.726	1	S	NNACINFKSSSAGKESPKVRRHSSPSSPTSP	X;X;X;X;X;X;X;X;X;X;X;X;X;X;X;Phospho (STY);X;X;X;X;X;X;Phospho (STY);X;X;X;Phospho (STY);X;Phospho (STY);Phospho (STY);X	XXXXXXXXPPPPPPPPPPPPXXXXXXXXXXX	SSS(0.001)AGKES(0.999)PKVR	S(-36.63)S(-36.63)S(-32.45)AGKES(32.45)PKVR	8	2	0.13676	0	0	0	0	0	0	9129500	0	0	15414000	0	2222600	0	0	2506200	3656400	0	0	112	112	2878	3169	41578;41579;41580;41581;41582;41583;41584	42101;42102;42103;42104	41581	42104	Service_Sonenberg_150119_18
O35551	407	O35551	O35551	Rab GTPase-binding effector protein 1	Rabep1		0.879868	9.02297	2.64597e-11	79.237	74.69	44.759	1;2	S	KSDNDMFKDGLRRAQSTDSLGTSSSLQSKAL	X;X;X;X;X;X;X;X;X;X;X;X;X;X;X;Phospho (STY);X;X;Phospho (STY);X;X;X;X;X;X;X;X;X;X;X;X	XXXXXXXXXXXXPPPPPPPPPPPPPPPPPXX	RAQS(0.88)T(0.11)DS(0.009)LGTSSSLQSK	RAQS(9.02)T(-9.02)DS(-19.75)LGT(-34.26)S(-38.45)S(-40.2)S(-41.68)LQS(-43.8)K	4	3	0.63385	0	0	814610	0	0	1171300	0	802690	1694800	1917200	1036100	0	0	983730	1015300	0	0	1296300	407	407	2037	2241;2242	28929;28931;28933;28934;28936;28937;28939;28949;28956	28316;28317;28319;28322;28323;28325;28326;28329;28330;28333	28937	28326	Service_Sonenberg_150119_15
O35551	410	O35551	O35551	Rab GTPase-binding effector protein 1	Rabep1		0.921724	8.79909	1.15102e-09	69.765	63.951	50.858	1;2	S	NDMFKDGLRRAQSTDSLGTSSSLQSKALGYN	X;X;X;X;X;X;X;X;X;X;X;X;Phospho (STY);Phospho (STY);X;Phospho (STY);X;X;X;X;X;X;X;X;X;X;X;X;X;X;X	XXXXXXXXXPPPPPPPPPPPPPPPPPXXXXX	RAQS(0.498)T(0.562)DS(0.922)LGT(0.011)S(0.004)S(0.002)S(0.001)LQSK	RAQS(-0.6)T(0.6)DS(8.8)LGT(-20.86)S(-25.32)S(-29.51)S(-33.4)LQS(-45.8)K	7	3	-0.47146	1284000	0	0	1508800	1601800	0	1822800	485750	0	1917200	0	0	0	2081400	2153100	0	2605900	0	410	410	2037	2241;2242	28930;28955;28956;28957;28958;28959;28960;28961;28962;28963;28964	28318;28332;28333;28334;28335	28957	28334	Service_Sonenberg_150119_15
O35601	663	O35601	O35601	FYN-binding protein	Fyb		0.499346	0	6.82398e-06	50.425	41.945	50.425		S	GKDDRKKSIREKPKVSESDNNEGSSLPSQHK	X;X;X;X;X;X;X;X;X;X;X;X;X;X;X;Phospho (STY);X;X;X;X;X;X;X;X;X;X;X;X;X;X;X	XXXXXXXXXXPPPPPPPPPPPPPPPPPPPPP	EKPKVS(0.499)ES(0.499)DNNEGS(0.001)SLPSQHK	EKPKVS(0)ES(0)DNNEGS(-26.98)S(-32.32)LPS(-45.22)QHK	6	3	-0.24275	0	0	0	0	0	0	0	0	0	0	0	0	0	0	0	0	0	0	663	663	655;3377	713;3713			9130	9813	Service_Sonenberg_150119_6
O35601	665	O35601	O35601	FYN-binding protein	Fyb		0.499346	0	6.82398e-06	50.425	41.945	50.425		S	DDRKKSIREKPKVSESDNNEGSSLPSQHKQL	X;X;X;X;X;X;X;X;X;X;X;X;X;X;X;X;X;X;X;X;X;X;X;X;X;X;X;X;X;X;X	XXXXXXXXXXXXXXXXXXXXXXXXXXXXXXX	EKPKVS(0.499)ES(0.499)DNNEGS(0.001)SLPSQHK	EKPKVS(0)ES(0)DNNEGS(-26.98)S(-32.32)LPS(-45.22)QHK	8	3	-0.24275	0	0	0	0	0	0	0	0	0	0	0	0	0	0	0	0	0	0	665	665	655;3377	713;3713			9130	9813	Service_Sonenberg_150119_6
O35601	672	O35601	O35601	FYN-binding protein	Fyb		0.928042	12.4395	3.2181e-05	53.981	41.621	53.981	1	S	REKPKVSESDNNEGSSLPSQHKQLDVGEEVY	X;X;X;X;X;X;X;X;X;X;X;X;X;X;X;Phospho (STY);X;X;X;X;X;X;X;X;X;X;X;X;X;X;X	XXXXXPPPPPPPPPPPPPPPPPXXXXXXXXX	VS(0.003)ES(0.004)DNNEGS(0.053)S(0.928)LPS(0.012)QHK	VS(-24.44)ES(-23.98)DNNEGS(-12.44)S(12.44)LPS(-18.89)QHK	11	2	0.40889	0	0	0	0	0	893030	1032900	414590	0	1883200	0	0	623390	0	487030	687710	1117500	435030	672	672	655;3377	713;3713	48836;48837;48838;48839;48840;48841;48842;48843;48844	49178	48836	49178	Service_Sonenberg_150119_10
O35601	201	O35601	O35601	FYN-binding protein	Fyb		0.332053	0	1.16061e-23	78.837	66.05	78.837		S	DSKPRFPRHTFGQKPSLSTEDSQEENTSKNV	X;X;X;X;X;X;X;X;X;X;X;X;X;X;X;Phospho (STY);X;X;X;X;X;X;X;X;X;X;X;X;X;X;X	XXXXXXXXPPPPPPPPPPPPPPPPPPPPPXX	HT(0.002)FGQKPS(0.332)LS(0.332)T(0.332)EDS(0.001)QEENTSK	HT(-21.41)FGQKPS(0)LS(0)T(0)EDS(-23.63)QEENT(-68.54)S(-71.91)K	8	4	-0.84479	0	0	0	0	0	0	0	0	0	0	0	0	0	0	0	0	0	0	201	201	1156	1257			16111	16524	Service_Sonenberg_150119_6
O35601	203	O35601	O35601	FYN-binding protein	Fyb		0.453193	0	1.16061e-23	78.837	66.05	60.943		S	KPRFPRHTFGQKPSLSTEDSQEENTSKNVPV	X;X;X;X;X;X;X;X;X;X;X;X;X;X;X;Phospho (STY);X;X;X;X;X;X;X;X;X;X;X;X;X;X;X	XXXXXXPPPPPPPPPPPPPPPPPPPPPXXXX	HTFGQKPS(0.089)LS(0.453)T(0.453)EDS(0.004)QEENTSK	HT(-39.73)FGQKPS(-7.08)LS(0)T(0)EDS(-20.52)QEENT(-31.2)S(-30.64)K	10	3	-0.36459	0	0	0	0	0	0	0	0	0	0	0	0	0	0	0	0	0	0	203	203	1156	1257			16109	16522	Service_Sonenberg_150119_2
O35601	568	O35601	O35601	FYN-binding protein	Fyb		1	54.7838	1.63177e-05	62.633	38.678	54.784	1	S	TAVEIDYDSLKRKKNSLNAVPPRLVEDDQDV	X;X;X;X;X;X;Phospho (STY);X;Phospho (STY);X;X;X;X;X;X;Phospho (STY);X;X;X;X;X;X;X;X;X;X;X;X;X;X;X	XXXXXXXXXXXXXPPPPPPPPPPXXXXXXXX	KNS(1)LNAVPPR	KNS(54.78)LNAVPPR	3	2	-0.86377	600910	289250	0	0	0	0	0	339630	0	536630	528770	496710	802070	359050	762610	684910	986080	0	568	568	1409	1529	20008;20009;20010;20011;20012;20013;20014;20015;20016;20017;20018;20019;20020	20433;20434;20435;20436	20011	20436	Service_Sonenberg_150119_15
O35601	222	O35601	O35601	FYN-binding protein	Fyb		1	41.3476	1.09433e-06	62.765	54.854	41.348	1	S	SQEENTSKNVPVQKGSPVQLGAKSKGAPFKP	X;X;X;X;X;X;X;X;X;X;X;X;X;X;X;Phospho (STY);X;X;X;X;X;X;X;X;X;X;X;X;X;X;X	XXXXXXXXPPPPPPPPPPPPPPPXXXXXXXX	NVPVQKGS(1)PVQLGAK	NVPVQKGS(41.35)PVQLGAK	8	3	0.064521	1673200	0	0	0	0	1650900	3170600	2245000	0	0	1457900	0	2085000	3753500	1879100	1421600	938630	1099900	222	222	1900	2092	27223;27224;27225;27226;27227;27228;27229;27230;27231;27232;27233;27234;27235;27236;27237;27238;27239;27240;27241	26927;26928;26929;26930;26931;26932;26933	27228	26933	Service_Sonenberg_150119_16
O35601	561	O35601	O35601	FYN-binding protein	Fyb		1	64.2097	7.04116e-16	114.56	88.845	114.56	1	S	SYGYIKTTAVEIDYDSLKRKKNSLNAVPPRL	X;X;X;X;X;X;X;X;X;X;X;X;X;X;X;Phospho (STY);X;X;X;X;X;X;Phospho (STY);X;X;X;X;X;X;X;X	XXXXXXPPPPPPPPPPPPPXXXXXXXXXXXX	TTAVEIDYDS(1)LKR	T(-99.53)T(-99.53)AVEIDY(-64.21)DS(64.21)LKR	10	2	-1.3096	3655800	7537800	9826500	0	5590200	3947100	5128700	5923900	3350700	3329100	0	2423100	2548900	5407200	0	1343900	2087100	0	561	561	3218	3538	46590;46591;46592;46593;46594;46595;46596;46597;46599;46600;46601;46602;46603;46604;46605;46606;46607;46608;46609;46610;46611;46612;46613;46614;46615;46616;46617	47273;47274;47275;47276;47277;47278;47279;47280;47281;47282;47283;47284;47285;47286;47287;47290;47291;47292;47293;47294;47295;47296;47297;47298;47299;47300;47301;47302;47303;47304;47305	46594	47284	Service_Sonenberg_150119_3
O35601	28	O35601	O35601	FYN-binding protein	Fyb		0.879733	9.16141	3.32565e-09	78.763	60.677	78.763	1	S	EAATSSRPFKVAGQSSPSGIQSRKNLFDNQG	X;X;X;X;X;X;X;X;X;X;X;X;X;Deamidation (NQ);X;Phospho (STY);X;X;X;X;X;X;X;X;X;X;X;X;X;X;X	XXXXXXXXXXPPPPPPPPPPPPPXXXXXXXX	VAGQS(0.107)S(0.88)PS(0.014)GIQSR	VAGQS(-9.16)S(9.16)PS(-18.13)GIQS(-43.56)R	6	2	0.85169	107040000	0	121380000	62501000	0	50616000	147500000	43114000	104670000	71314000	81964000	54907000	80643000	123910000	71360000	55516000	60589000	51728000	28	28	3265	3591;3592	47301;47302;47303;47304;47305;47306;47307;47308;47309;47310;47311;47312;47313;47314;47315;47316;47317;47318	47915;47916;47917;47918;47919;47920;47921;47922;47923;47924;47925;47926;47927;47928;47929;47930;47931;47932;47933;47934	47308	47928	Service_Sonenberg_150119_10
O35609	78	O35609	O35609	Secretory carrier-associated membrane protein 3	Scamp3		0.999779	36.5518	0.00255151	90.906	49.03	80.755	1	S	LPPPSAPSVQSSRKLSPTEPRNYGSYSTQAS	X;X;X;X;X;X;X;X;X;X;X;X;X;X;X;Phospho (STY);X;X;X;X;X;X;X;X;X;X;X;X;X;X;X	XXXXXXXXXXXXXPPPPPPPPXXXXXXXXXX	KLS(1)PTEPR	KLS(36.55)PT(-36.55)EPR	3	2	-0.55627	32028000	39888000	17478000	37948000	29451000	29661000	47793000	22573000	33296000	48000000	39798000	37739000	25689000	41065000	27372000	22604000	35006000	25912000	78	78	1394	1512	19838;19839;19840;19841;19842;19843;19844;19845;19846;19848;19849;19850;19851;19852;19853;19854;19855;19856;19857;19858;19859;19860;19861;19862;19863;19864;19865	20254;20255;20256;20257;20258;20259;20260;20261;20262;20263;20264;20265;20266;20267;20268;20269;20270;20271;20272;20273;20276;20277;20278;20279;20280;20281;20282;20283;20284;20285;20286;20287;20288;20289;20290;20291;20292;20293;20294;20295;20296;20297;20298;20299;20300;20301;20302;20303	19848	20276	Service_Sonenberg_150119_10
O35613	626	O35613	O35613	Death domain-associated protein 6	Daxx		0.999986	48.4507	0.00248826	68.371	31.814	66.27	1	S	TSVNGRVSSHTWRDASPPSKRFRKEKKQLGS	X;X;X;X;X;X;X;X;X;X;X;X;X;X;X;Phospho (STY);X;X;X;X;X;X;X;X;X;X;X;X;X;X;X	XXXXXXXXXXXXXPPPPPPPPXXXXXXXXXX	DAS(1)PPSKR	DAS(48.45)PPS(-48.45)KR	3	2	1.4258	30623000	44631000	3688600	27650000	0	17594000	25343000	19333000	84775000	41179000	28377000	16068000	27282000	32277000	20881000	17207000	18806000	7190800	626	626	397	434	5736;5737;5738;5739;5740;5741;5742;5743;5744;5745;5746;5747;5748;5749;5750;5751;5752;5753	7023;7024;7025;7026;7027;7028;7029;7030;7031;7032;7033;7034;7035;7036;7037;7038;7039;7040;7041;7042;7043	5741	7033	Service_Sonenberg_150119_10
O35613	515	O35613	O35613	Death domain-associated protein 6	Daxx		1	82.489	6.07242e-05	106.67	71.913	82.489	1	S	NESPTSPSDFFHRRNSEPAEGLRTPEGQQKR	X;X;X;X;X;X;X;X;X;X;X;X;X;X;X;Phospho (STY);X;X;X;X;X;X;X;X;X;X;X;X;X;X;X	XXXXXXXXXXXXXPPPPPPPPPPXXXXXXXX	RNS(1)EPAEGLR	RNS(82.49)EPAEGLR	3	2	0.40345	0	2397100	0	4517900	7511100	4456200	0	0	0	5748600	7835800	7758900	0	0	0	5017500	7758400	4615400	515	515	1862;1863;2196	2047;2048;2415	31247;31248;31249;31250;31251;31252;31253;31254;31255;31256	30742;30743;30744;30745;30746;30747;30748;30749;30750;30751;30752;30753;30754;30755;30756;30757;30758;30759;30760;30761;30762;30763;30764;30765;30766;30767;30768;30769;30770;30771;30772;30773	31256	30772	Service_Sonenberg_150119_18
O35623	50	O35623	O35623	BET1 homolog	Bet1		0.938609	11.8438	0.00317522	46.022	23.309	46.022	1	S	LTESLRSKVTAIKSLSIEIGHEVKNQNKLLA	X;X;X;X;X;X;X;X;X;X;X;X;X;X;X;Phospho (STY);X;X;X;X;X;X;X;X;X;X;X;X;X;X;X	XXXXXXXXXXXXXPPPPPPPPPPPXXXXXXX	S(0.061)LS(0.939)IEIGHEVK	S(-11.84)LS(11.84)IEIGHEVK	3	2	-0.33515	0	0	0	0	0	0	0	292280	213280	336550	0	0	247440	182910	0	0	428880	552050	50	50	2659	2926	38202;38203;38204;38205;38206;38207;38208	38440	38202	38440	Service_Sonenberg_150119_17
O35691	66	O35691	O35691	Pinin	Pnn		0.999538	33.3555	7.46082e-11	107.97	78.031	107.97	1	S	GGGRGRGSLLLRRGFSDSGGGPPAKQRDLEG	X;X;X;X;X;X;X;X;X;X;X;X;X;X;X;Phospho (STY);X;X;X;X;X;X;X;X;X;X;X;X;X;X;X	XXXXXXXXXXXXXPPPPPPPPPPPPXXXXXX	GFS(1)DSGGGPPAK	GFS(33.36)DS(-33.36)GGGPPAK	3	2	-0.18647	1033900	0	741330	8344500	5100800	3741800	1109600	0	1123100	7068600	7479900	6278400	1345000	981830	928990	9931200	9185900	4672900	66	66	887	961	12316;12317;12318;12319;12320;12321;12322;12323;12324;12325;12326;12327;12328;12329;12330;12331	12911;12912;12913;12914;12915;12916;12917;12918;12919;12920;12921;12922;12923;12924;12925;12926;12927;12928;12929;12930;12931;12932;12933;12934;12935;12936;12937;12938;12939;12940;12941;12942;12943;12944	12320	12923	Service_Sonenberg_150119_10
O35711	405	O35711	O35711	Liprin-beta-2	Ppfibp2		1	41.0916	0.000403878	42.382	31.566	41.092	1	S	LRRESGDKCVDGNQLSPVGEPKDSSFLAEQK	X;X;X;X;X;X;X;X;X;X;X;X;X;X;X;Phospho (STY);X;X;X;X;X;X;X;X;X;X;X;X;X;X;X	XXXPPPPPPPPPPPPPPPPPPPXXXXXXXXX	CVDGNQLS(1)PVGEPK	CVDGNQLS(41.09)PVGEPK	8	2	0.46563	0	0	0	0	0	1479100	0	0	275710	2921700	1597000	2026600	0	0	362440	1389600	2708400	0	405	405	379;744	416;811	5551;5552;5553;5554;5555;5556;5557;5558;10463	6914;11239	5551	6914	Service_Sonenberg_150119_17
O35711	386	O35711	O35711	Liprin-beta-2	Ppfibp2		0.991531	20.6848	0.00178396	42.843	24.067	41.684	1	S	PQKSLESRAQKKLSCSLEDLRRESGDKCVDG	X;X;X;X;X;X;X;X;X;X;X;X;X;X;X;Phospho (STY);X;X;X;X;X;X;X;X;X;X;X;X;X;X;X	XXXXXXXXXXXPPPPPPPPPPPXXXXXXXXX	LS(0.008)CS(0.992)LEDLRR	LS(-20.68)CS(20.68)LEDLRR	4	3	0.28944	368590	482140	0	167600	226410	116090	289420	281630	177570	285140	69512	196650	239800	172270	297010	183710	222700	179220	386	386	1388;1389;1652	1506;1507;1795	19766;19767;19768;19769;19770;19771;19772;19773;19774;19775;19776;19777;19778;19779;19780;19781;19782;19783;23453;23454;23455;23456;23457;23458;23459;23460;23461;23462;23463;23464	20202;20203;23664;23665;23666	23454	23665	Service_Sonenberg_150119_9
O35711	518	O35711	O35711	Liprin-beta-2	Ppfibp2		0.495517	0	0.000285966	43.841	27.899	43.841		S	PKGIKKFWGKIRRTQSGNFNTDAPGMAEFRR	X;X;X;X;X;X;X;X;X;X;X;X;X;X;X;X;X;X;X;X;X;X;X;X;X;X;X;X;X;X;X	XXXXXXXXXXXXXXXXXXXXXXXXXXXXXXX	RT(0.496)QS(0.496)GNFNT(0.009)DAPGMAEFR	RT(0)QS(0)GNFNT(-17.42)DAPGMAEFR	4	3	-0.057401	0	0	0	0	0	0	0	0	0	0	0	0	0	0	0	0	0	0	518	518	2333	2562			33392	32894	Service_Sonenberg_150119_9
P70333;O35737	104;104	P70333	P70333	Heterogeneous nuclear ribonucleoprotein H2;Heterogeneous nuclear ribonucleoprotein H;Heterogeneous nuclear ribonucleoprotein H, N-terminally processed	Hnrnph2;Hnrnph1		0.997983	28.4047	4.08816e-11	79.676	69.3	55.186	1	S	NSVEMDWVLKHTGPNSPDTANDGFVRLRGLP	X;X;X;X;X;X;X;X;X;X;X;X;X;X;X;Phospho (STY);X;X;X;X;X;X;X;X;X;X;X;X;X;X;X	XXXXXXXXXXPPPPPPPPPPPPPPPPXXXXX	HT(0.001)GPNS(0.998)PDT(0.001)ANDGFVR	HT(-32.38)GPNS(28.4)PDT(-28.4)ANDGFVR	6	2	0.99704	16784000	11953000	6892900	19082000	27595000	27712000	20762000	9813800	16445000	28467000	16525000	13905000	10041000	8560300	11222000	18341000	38375000	31173000	104	104	1159	1262	16190;16191;16192;16193;16194;16195;16196;16197;16198;16199;16200;16201;16202;16203;16205;16206;16207;16208;16209;16210;16211;16212;16213;16214;16215;16216;16217;16218;16219;16220;16221;16222;16223;16224;16225;16226;16227;16228;16229;16230	16582;16583;16584;16585;16586;16587;16588;16589;16590;16591;16592;16593;16594;16595;16596;16597;16598;16599;16600;16601;16602;16603;16604;16605;16606;16607;16608;16609;16610;16611;16612;16613;16615;16616;16617;16618;16619;16620;16621;16622;16623;16624;16625;16626;16627;16628;16629;16630;16631;16632;16633;16634;16635;16636;16637;16638;16639;16640;16641;16642;16643;16644;16645;16646;16647;16648;166…	16210	16627	Service_Sonenberg_150119_12
O35841	461	O35841	O35841	Apoptosis inhibitor 5	Api5		0.420398	0.284649	1.20949e-18	67.519	42.177	67.519		S	VQKVEIGQKRTSEDTSSGSPPKKSPGGPKRD	X;X;X;X;X;X;X;X;X;X;X;X;X;X;X;Phospho (STY);X;X;X;X;X;X;X;X;X;X;X;X;X;X;X	XXXXXXXXXXPPPPPPPPPPPPXXXXXXXXX	TSEDT(0.031)S(0.42)S(0.155)GS(0.394)PPK	T(-61.74)S(-59.2)EDT(-11.31)S(0.28)S(-4.34)GS(-0.28)PPK	6	2	-0.36464	0	0	0	0	0	0	0	0	0	0	0	0	0	0	0	0	0	0	461	461	3188;3189;3190	3507;3508;3509			46179	46990	Service_Sonenberg_150119_1
O35841	462	O35841	O35841	Apoptosis inhibitor 5	Api5		0.422948	0	7.46633e-05	43.175	32.119	43.175		S	QKVEIGQKRTSEDTSSGSPPKKSPGGPKRDA	X;X;X;X;X;X;X;X;X;X;X;X;X;X;X;Phospho (STY);X;X;X;X;X;X;X;X;X;X;X;X;X;X;X	XXXXXXXXXPPPPPPPPPPPPPPPPPPPXXX	TSEDT(0.032)S(0.113)S(0.423)GS(0.423)PPKKS(0.008)PGGPK	T(-31.05)S(-31.05)EDT(-11.2)S(-5.72)S(0)GS(0)PPKKS(-17.24)PGGPK	7	3	0.33247	0	0	0	0	0	0	0	0	0	0	0	0	0	0	0	0	0	0	462	462	3188;3189;3190	3507;3508;3509			46209	47004	Service_Sonenberg_150119_2
O35841	464	O35841	O35841	Apoptosis inhibitor 5	Api5		0.996263	25.1817	2.81158e-59	154.72	131.71	154.72	1	S	VEIGQKRTSEDTSSGSPPKKSPGGPKRDARQ	X;X;X;X;X;X;X;X;X;X;X;X;X;X;X;Phospho (STY);X;X;X;X;X;X;X;X;X;X;X;X;X;X;X	XXXXXXXPPPPPPPPPPPPPPPPPPPXXXXX	TSEDTS(0.001)S(0.003)GS(0.996)PPKK	T(-132.23)S(-129.28)EDT(-60.95)S(-31.44)S(-25.18)GS(25.18)PPKK	9	2	-0.51632	2541800	1296400	6289600	2124100	7183100	995240	6345500	1313100	2842700	4979400	3039500	1926600	1894800	8363300	3006300	583420	1254000	767040	464	464	3188;3189;3190	3507;3508;3509	46180;46181;46182;46183;46184;46185;46186;46187;46188;46189;46190;46191;46192;46193;46194;46195;46196;46197;46198;46199;46200;46201;46202;46203;46204;46205;46206;46207;46208;46210;46211;46213;46214;46215;46216;46217;46218;46219;46220;46221;46222;46223;46225;46226;46228;46229;46230;46231;46232	46991;46992;46993;46994;46995;46996;46997;46998;46999;47000;47001;47002;47003;47005;47006;47008;47009;47010;47011;47012;47013;47014;47015;47016;47017;47018;47019	46194	47000	Service_Sonenberg_150119_10
O35892	314	O35892	O35892	Nuclear autoantigen Sp-100	Sp100		0.46521	0	4.6244e-05	52.784	39.907	44.252		S	SRKPPTLRRDRGGDTSDTESSIIIRRRKRTG	X;X;X;X;X;X;X;X;X;X;X;X;X;X;X;X;X;X;X;X;X;X;X;X;X;X;X;X;X;X;X	XXXXXXXXXXXXXXXXXXXXXXXXXXXXXXX	DRGGDT(0.465)S(0.465)DT(0.047)ES(0.011)S(0.011)IIIR	DRGGDT(0)S(0)DT(-9.95)ES(-16.16)S(-16.16)IIIR	7	2	-0.29418	0	0	0	0	0	0	0	0	0	0	0	0	0	0	0	0	0	0	314	314	494	541			6949	7851	Service_Sonenberg_150119_18
O35955	229	O35955	O35955	Proteasome subunit beta type-10	Psmb10		0.99065	20.2509	7.03503e-31	145.99	112.12	145.99	1	S	ACVITAGGAKLQRALSTPTEPVQRAGRYRFA	X;X;X;X;X;X;X;X;X;X;X;X;X;X;X;Phospho (STY);X;X;X;X;X;X;X;X;X;X;X;X;X;X;X	XXXXXXXXXXXXXPPPPPPPPPPPXXXXXXX	ALS(0.991)T(0.009)PTEPVQR	ALS(20.25)T(-20.25)PT(-69.06)EPVQR	3	2	-0.78257	0	553770	0	2423100	5728800	1950200	0	0	0	8943500	3001500	6492400	0	0	0	3876500	5657300	4585600	229	229	183	197	2699;2700;2701;2702;2703;2704;2705;2706;2707;2708	2674;2675;2676;2677;2678;2679;2680;2681;2682;2683;2684;2685;2686;2687;2688;2689;2690;2691;2692;2693	2707	2692	Service_Sonenberg_150119_18
O54774	754	O54774	O54774	AP-3 complex subunit delta-1	Ap3d1		0.4548	0.427196	2.15319e-05	53.059	41.416	44.382		S	KDKKRKKKEKGKRRHSSLPTESDEDIAPAQR	X;X;X;X;X;X;X;X;X;X;X;X;X;X;X;Phospho (STY);X;X;X;X;X;Phospho (STY);X;X;X;X;X;X;X;X;X	XXXXXXXXXXXXXXPPPPPPPPPPPPPPPPP	HS(0.455)S(0.412)LPT(0.105)ES(0.028)DEDIAPAQR	HS(0.43)S(-0.43)LPT(-6.38)ES(-12.04)DEDIAPAQR	2	3	-0.031782	0	0	0	0	0	0	0	0	0	0	0	0	0	0	0	0	0	0	754	754	1147;2128	1244;1245;2341;2342			15939	16339	Service_Sonenberg_150119_12
O54774	755	O54774	O54774	AP-3 complex subunit delta-1	Ap3d1		0.902743	9.70297	1.90154e-09	71.344	58.144	71.344	2	S	DKKRKKKEKGKRRHSSLPTESDEDIAPAQRV	X;X;X;X;X;X;X;X;X;X;X;X;X;X;X;Phospho (STY);X;X;Phospho (STY);X;Phospho (STY);X;X;X;X;X;X;X;X;X;X	XXXXXXXXXXXXPPPPPPPPPPPPPPPPPPX	HS(0.097)S(0.903)LPT(0.206)ES(0.794)DEDIAPAQR	HS(-9.7)S(9.7)LPT(-5.87)ES(5.87)DEDIAPAQR	3	2	0.90259	1150500	569420	2373400	0	4531600	2851100	4521700	967870	1435000	2755100	1820000	0	0	1821500	2597200	0	0	3501900	755	755	1147;2128	1244;1245;2341;2342	15953;15954;15955;15956;15958;15959;15960;15961;15962;15963;15965;15966;15969;30296	16354;16355;16356;16357;16359;16360;16361;16362;29818	15958	16359	Service_Sonenberg_150119_8
O54774	760	O54774	O54774	AP-3 complex subunit delta-1	Ap3d1		0.999236	31.5451	2.5996e-18	88.396	75.548	88.396	1;2	S	KKEKGKRRHSSLPTESDEDIAPAQRVDIITE	X;X;X;X;X;X;X;X;X;Phospho (STY);Phospho (STY);X;X;Phospho (STY);X;Phospho (STY);X;X;X;X;X;X;X;X;X;X;X;X;X;X;X	XXXXXXXPPPPPPPPPPPPPPPPPPXXXXXX	RHSSLPT(0.001)ES(0.999)DEDIAPAQR	RHS(-44.94)S(-44.94)LPT(-31.55)ES(31.55)DEDIAPAQR	9	3	-1.2575	34681000	15541000	9584800	7648200	0	0	0	16747000	28426000	0	0	0	26747000	0	2082100	6524200	20352000	12716000	760	760	1147;2128	1244;1245;2341;2342	15929;15930;15932;15935;15936;15937;15941;15945;15946;15948;15953;15956;15957;15958;15960;15961;15962;15963;15964;15965;15966;15967;15968;15969;15970;15971;15972;15973;30294;30295;30296;30297;30298;30299;30300;30301;30302;30303;30304;30305;30306;30307;30308;30309;30310	16319;16320;16321;16325;16326;16327;16331;16332;16333;16334;16335;16342;16349;16350;16351;16353;16354;16357;16358;16359;16361;16362;29816;29817;29818;29819;29820;29821;29822;29823;29824;29825;29826	30307	29823	Service_Sonenberg_150119_3
O54781	9	O54781	O54781	SRSF protein kinase 2;SRSF protein kinase 2 N-terminal;SRSF protein kinase 2 C-terminal	Srpk2		0.397678	1.25017	8.66348e-05	46.249	30.111	46.249		S	_______MSVNSEKSSSSERPEPQQKAPLVP	X;X;X;X;X;X;X;X;X;X;X;X;X;X;X;Phospho (STY);X;X;X;X;X;X;X;X;X;X;X;X;X;X;X	XXXXXXXXPPPPPPPPPPPPPPPPPPXXXXX	SVNSEKS(0.006)S(0.398)S(0.298)S(0.298)ERPEPQQK	S(-36.77)VNS(-31.9)EKS(-18.53)S(1.25)S(-1.25)S(-1.25)ERPEPQQK	8	2	-0.72118	0	0	0	0	0	0	0	0	0	0	0	0	0	0	0	0	0	0	9	9	2907;2975	3199;3273			43062	43908	Service_Sonenberg_150119_10
O54781	10	O54781	O54781	SRSF protein kinase 2;SRSF protein kinase 2 N-terminal;SRSF protein kinase 2 C-terminal	Srpk2		0.958679	16.9775	5.14312e-14	124.12	96.152	118.87	1	S	______MSVNSEKSSSSERPEPQQKAPLVPP	X;X;X;X;X;X;X;X;X;X;X;X;X;X;X;Phospho (STY);X;X;X;X;X;X;X;X;X;X;X;X;X;X;X	XXXXXXXPPPPPPPPPPPPPPPPPPXXXXXX	S(0.019)S(0.019)S(0.959)S(0.003)ERPEPQQK	S(-16.98)S(-16.98)S(16.98)S(-25.24)ERPEPQQK	3	2	-0.61917	6816100	2469300	9755000	4695000	5608700	2021100	7525900	1862200	4389400	9347600	4624400	2455900	5703000	8602500	5729500	3470200	4673300	2634900	10	10	2907;2975	3199;3273	42070;42071;42072;42073;42074;42075;42076;42077;42078;42079;42080;42081;42082;42083;42084;42085;42086;42087;43063;43064;43065;43066;43067;43068;43069;43070;43071;43073	42753;42754;42755;42756;42757;42758;42759;42760;42761;42762;42763;42764;42765;42766;42767;42768;42769;42770;42771;42772;42773;42774;42775;42776;42777;42778;42779;42780;43909	42082	42778	Service_Sonenberg_150119_15
O54781	11	O54781	O54781	SRSF protein kinase 2;SRSF protein kinase 2 N-terminal;SRSF protein kinase 2 C-terminal	Srpk2		0.633142	5.97018	8.01759e-06	52.862	43.074	52.862	1	S	_____MSVNSEKSSSSERPEPQQKAPLVPPP	X;X;X;X;X;X;X;X;X;X;X;X;X;X;X;Phospho (STY);X;X;X;X;X;X;X;X;X;X;X;X;X;X;X	XXXXXXPPPPPPPPPPPPPPPPPPXXXXXXX	S(0.001)VNS(0.004)EKS(0.042)S(0.16)S(0.16)S(0.633)ERPEPQQK	S(-29.57)VNS(-22.21)EKS(-11.77)S(-5.97)S(-5.97)S(5.97)ERPEPQQK	10	3	0.33643	11356000	0	0	0	0	0	0	0	0	0	0	0	0	0	8365100	0	0	0	11	11	2907;2975	3199;3273	43061;43072	43907	43061	43907	Service_Sonenberg_150119_1
O54781	487	O54781	O54781	SRSF protein kinase 2;SRSF protein kinase 2 N-terminal;SRSF protein kinase 2 C-terminal	Srpk2		0.866347	9.01793	0.00225324	41.293	26.417	41.293	2	S	EQEESSPSHDRSRTVSASSTGDLPKTKTRAA	X;X;X;X;X;X;X;X;X;X;X;X;X;X;X;Phospho (STY);X;X;Phospho (STY);X;X;X;X;X;X;X;X;X;X;X;X	XXXXXXXXXXXXXPPPPPPPPPPPPXXXXXX	T(0.105)VS(0.866)AS(0.368)S(0.372)T(0.288)GDLPK	T(-9.02)VS(9.02)AS(-0.2)S(0.2)T(-1.27)GDLPK	3	2	0.34224	0	0	0	0	1852000	0	0	0	0	0	0	0	0	0	0	0	0	0	487	487	3239	3560	46905	47506	46905	47506	Service_Sonenberg_150119_5
O54781	490	O54781	O54781	SRSF protein kinase 2;SRSF protein kinase 2 N-terminal;SRSF protein kinase 2 C-terminal	Srpk2		0.372282	0.201647	0.00225324	41.293	26.417	41.293		S	ESSPSHDRSRTVSASSTGDLPKTKTRAADLL	X;X;X;X;X;X;X;X;X;X;X;X;Phospho (STY);X;X;Phospho (STY);X;X;X;X;X;X;X;X;X;X;X;X;X;X;X	XXXXXXXXXXPPPPPPPPPPPPXXXXXXXXX	T(0.105)VS(0.866)AS(0.368)S(0.372)T(0.288)GDLPK	T(-9.02)VS(9.02)AS(-0.2)S(0.2)T(-1.27)GDLPK	6	2	0.34224	0	0	0	0	0	0	0	0	0	0	0	0	0	0	0	0	0	0	490	490	3239	3560			46905	47506	Service_Sonenberg_150119_5
O54786	28	O54786	O54786	DNA fragmentation factor subunit alpha	Dffa		0.998002	28.6798	9.66598e-14	68.49	51.411	58.366	1	S	DDVRPLKPCLLRRNHSRDQHGVAASSLEELR	X;X;X;X;X;X;X;X;X;X;X;X;X;X;X;Phospho (STY);X;X;X;X;X;X;X;X;X;X;X;X;X;X;X	XXXXXXXXXXXXXPPPPPPPPPPPPPPPPPP	NHS(0.998)RDQHGVAAS(0.001)S(0.001)LEELR	NHS(28.68)RDQHGVAAS(-28.68)S(-31.89)LEELR	3	4	-0.21506	381630	0	0	0	1293000	1467800	0	0	0	0	439530	836470	0	0	0	745220	0	2080700	28	28	1800	1977	25659;25660;25661;25662;25663;25664;25665	25598;25599;25600;25601;25602;25603	25659	25599	Service_Sonenberg_150119_5
O54786	314	O54786	O54786	DNA fragmentation factor subunit alpha	Dffa		1	44.5672	0.000736232	44.567	40.415	44.567	1	S	QVQSLHSLRNLSARRSPLPGEPQRPKRAKRD	X;X;X;X;X;X;X;X;X;X;X;X;X;X;X;Phospho (STY);X;X;X;X;X;X;X;X;X;X;X;X;X;X;X	XXXXXXXXXXXXXXPPPPPPPPPPPPXXXXX	RS(1)PLPGEPQRPK	RS(44.57)PLPGEPQRPK	2	3	0.19561	978500	787140	0	0	0	0	1308600	722740	1180200	1195900	1081900	1504600	1879600	1013100	1113100	605940	0	0	314	314	2286	2510	32535;32536;32537;32538;32539;32540;32541;32542;32543;32544;32545;32546	31991	32535	31991	Service_Sonenberg_150119_13
O54824	930	O54824	O54824	Pro-interleukin-16;Interleukin-16	Il16		1	61.1614	0.00245867	75.189	53.418	61.161	1	S	PESPPPGQRPSTKALSPDPLLRLLTTQSEDT	X;X;Phospho (STY);X;X;X;X;X;X;X;X;X;X;X;X;Phospho (STY);X;X;X;X;X;X;X;X;X;X;X;X;X;X;X	XXXXXXXXXXXXXPPPPPPPPPXXXXXXXXX	ALS(1)PDPLLR	ALS(61.16)PDPLLR	3	2	-0.0014468	411670	430410	267930	733560	784370	897690	328590	226690	282330	460680	386890	397670	144420	218770	176090	681800	1004200	1114100	930	930	179	192	2627;2628;2629;2630;2631;2632;2633;2634;2635;2636;2637;2638;2639;2640;2641;2642;2643;2644	2594;2595;2596;2597;2598;2599;2600;2601;2602;2603;2604;2605;2606;2607;2608;2609;2610;2611;2612;2613;2614	2638	2614	Service_Sonenberg_150119_18
O54824	917	O54824	O54824	Pro-interleukin-16;Interleukin-16	Il16		0.998821	32.2889	2.24745e-05	51.611	41.126	51.611	1	S	TFPNSSEVRDPGLPESPPPGQRPSTKALSPD	X;X;X;X;X;X;X;X;X;X;X;X;X;X;X;Phospho (STY);X;X;X;X;X;X;X;X;X;X;X;X;Phospho (STY);X;X	XXXXXXXXXPPPPPPPPPPPPPPPPPXXXXX	DPGLPES(0.999)PPPGQRPS(0.001)T(0.001)K	DPGLPES(32.29)PPPGQRPS(-32.29)T(-32.29)K	7	3	-0.10227	0	0	0	0	0	0	0	576080	1050800	1238700	1112000	941970	0	0	973270	0	0	0	917	917	480	527	6786;6787;6788;6789;6790;6791	7754	6786	7754	Service_Sonenberg_150119_15
O54834	716	O54834	O54834	Rho GTPase-activating protein 6	Arhgap6		0.954357	14.0768	0.000425858	64.73	50.495	46.352	1;2	S	VPEQYTLVGHLSSPKSKSRESSPGPRLGKEM	X;X;X;X;X;X;X;X;X;X;X;X;X;X;X;Phospho (STY);X;X;X;X;Phospho (STY);Phospho (STY);X;X;X;X;X;X;X;X;X	XXXXXXXXXXXXXXXPPPPPPPPPPPXXXXX	S(0.954)KS(0.037)RES(0.007)S(0.001)PGPR	S(14.08)KS(-14.08)RES(-21.42)S(-28.25)PGPR	1	3	0.64819	19523000	3062900	6446700	5588100	0	3102200	21607000	1515000	0	743670	5194700	0	2567200	0	7601600	3716800	7506500	971720	716	716	2621	2885;2886	37643;37647;37648;37649;37650;37651;37652;37653;37656;37658;37665;37667;37668;37669;37671;37673;37674;37676	37795;37800;37801;37802;37805;37807;37814	37658	37807	Service_Sonenberg_150119_11
O54834	718	O54834	O54834	Rho GTPase-activating protein 6	Arhgap6		0.989573	20.5019	0.00149041	79.283	53.391	79.283	1;2	S	EQYTLVGHLSSPKSKSRESSPGPRLGKEMSE	X;X;X;X;X;X;X;X;X;X;X;X;X;X;X;Phospho (STY);X;X;Phospho (STY);Phospho (STY);X;X;X;X;X;X;X;X;X;X;X	XXXXXXXXXXXXXPPPPPPPPPPPXXXXXXX	S(0.009)KS(0.99)RES(0.001)S(0.001)PGPR	S(-20.5)KS(20.5)RES(-32.33)S(-29.82)PGPR	3	2	1.1211	757700	0	0	0	0	647630	1556700	4491100	2236800	13319000	1377100	9940400	0	2885100	750080	1019100	0	304840	718	718	2621;2783	2885;2886;3063	37644;37645;37646;37654;37655;37657;37659;37660;37661;37662;37663;37664;37666;37670;37672;37675	37796;37797;37798;37799;37803;37804;37806;37808;37809;37810;37811;37812;37813	37657	37806	Service_Sonenberg_150119_10
O54834	721	O54834	O54834	Rho GTPase-activating protein 6	Arhgap6		0.558644	1.07108	0.00386909	61.593	43.369	47.429	2	S	TLVGHLSSPKSKSRESSPGPRLGKEMSEEPF	X;X;X;X;X;X;X;X;X;X;Phospho (STY);X;Phospho (STY);X;X;Phospho (STY);X;X;X;X;X;X;X;X;X;X;X;X;X;X;X	XXXXXXXXXXPPPPPPPPPPPXXXXXXXXXX	S(0.124)KS(0.873)RES(0.559)S(0.444)PGPR	S(-8.76)KS(8.76)RES(1.07)S(-1.07)PGPR	6	2	0.85777	16641000	2315100	0	0	0	0	21607000	0	0	11701000	0	0	713020	0	7601600	3716800	3971500	0	721	721	2621;2783	2885;2886;3063	37643;37645;37647;37648;37649;37650;37651;37652	37795;37797;37798;37800;37801	37645	37798	Service_Sonenberg_150119_10
O54834	722	O54834	O54834	Rho GTPase-activating protein 6	Arhgap6		0.713454	3.88602	0.00183379	61.593	43.369	49.243	2	S	LVGHLSSPKSKSRESSPGPRLGKEMSEEPFN	X;X;X;X;X;X;X;X;X;Phospho (STY);X;Phospho (STY);X;X;X;Phospho (STY);X;X;X;X;X;X;X;X;X;X;X;X;X;X;X	XXXXXXXXXPPPPPPPPPPPXXXXXXXXXXX	S(0.123)KS(0.858)RES(0.305)S(0.713)PGPR	S(-8.57)KS(8.57)RES(-3.89)S(3.89)PGPR	7	2	0.084317	0	0	0	0	0	0	0	4191000	0	0	0	9096000	0	0	0	0	0	0	722	722	2621;2783	2885;2886;3063	37644;37646	37796;37799	37646	37799	Service_Sonenberg_150119_12
O54834	824	O54834	O54834	Rho GTPase-activating protein 6	Arhgap6		0.806925	6.21391	0.000776544	46.159	39.185	43.77		S	TVEQCSVHLPVSRVCSTPHIQDGSRGTRRPA	X;X;X;X;X;X;X;X;X;X;X;X;X;X;X;Phospho (STY);X;X;X;X;X;X;X;X;X;X;X;X;X;X;X	XXXXXXXXXXXXXPPPPPPPPPPPPXXXXXX	VCS(0.807)T(0.193)PHIQDGSR	VCS(6.21)T(-6.21)PHIQDGS(-38.05)R	3	2	-0.035507	0	0	0	0	0	0	1876900	459120	1246000	609270	0	958330	1140600	0	0	0	794790	377480	824	824	3274	3601	47408;47409;47410;47411;47412;47413;47414;47415	47981;47982	47408	47981	Service_Sonenberg_150119_7
O54885	90	O54885	O54885	TYRO protein tyrosine kinase-binding protein	Tyrobp		0.47155	0	4.18103e-11	44.319	34.261	44.319		S	GTAEGTRKQHIAETESPYQELQGQRPEVYSD	X;X;X;X;X;X;X;X;X;X;X;X;X;X;X;X;X;X;X;X;X;X;X;X;X;X;X;X;X;X;X	XXXXXXXXXXXXXXXXXXXXXXXXXXXXXXX	KQHIAET(0.472)ES(0.472)PY(0.057)QELQGQRPEVYSDLNTQR	KQHIAET(0)ES(0)PY(-9.21)QELQGQRPEVY(-34.78)S(-34.52)DLNT(-39.05)QR	9	4	0.36456	0	0	0	0	0	0	0	0	0	0	0	0	0	0	0	0	0	0	90	90	1433	1557			20374	20916	Service_Sonenberg_150119_2
O54910	18	O54910	O54910	NF-kappa-B inhibitor epsilon	Nfkbie		0.987351	19.8071	1.6669e-05	50.783	43.452	50.783	1	S	DARKGPDEADDSQCDSGIESLRSLRSLPEPT	X;X;X;X;X;X;X;X;X;X;X;X;X;X;X;Phospho (STY);X;X;X;X;X;X;X;X;X;X;X;X;X;X;X	XXXPPPPPPPPPPPPPPPPPPPXXXXXXXXX	KGPDEADDS(0.002)QCDS(0.987)GIES(0.01)LR	KGPDEADDS(-26.28)QCDS(19.81)GIES(-19.81)LR	13	3	0.37162	407510	811130	447460	0	2389200	0	0	814140	625910	2488800	1073000	0	432850	233190	495800	0	0	0	18	18	1337	1450	18722;18723;18724;18725;18726;18727;18728;18729;18730;18731;18732	18881;18882;18883;18884;18885	18723	18882	Service_Sonenberg_150119_8
O54916	273	O54916	O54916	RalBP1-associated Eps domain-containing protein 1	Reps1		0.3311	0	0.000141479	42.123	18.324	42.123		S	TVASAATANEIRRQSSSYEDPWKITDEQRQY	X;X;X;X;X;X;X;X;X;X;X;X;X;X;X;Phospho (STY);X;X;X;X;X;X;X;X;X;X;X;X;X;X;X	XXXXXXXXXXXXPPPPPPPPPPPPPPPPPXX	RQS(0.262)S(0.331)S(0.331)Y(0.074)EDPWKIT(0.001)DEQR	RQS(-1.01)S(0)S(0)Y(-6.48)EDPWKIT(-25.63)DEQR	4	3	-0.37863	0	0	0	0	0	0	0	0	0	0	0	0	0	0	0	0	0	0	273	273	2251	2473			32046	31556	Service_Sonenberg_150119_3
O54916	274	O54916	O54916	RalBP1-associated Eps domain-containing protein 1	Reps1		0.3311	0	0.000141479	42.123	18.324	42.123		S	VASAATANEIRRQSSSYEDPWKITDEQRQYY	X;X;X;X;X;X;X;X;X;X;X;X;X;X;X;X;X;X;X;X;X;X;X;X;X;X;X;X;X;X;X	XXXXXXXXXXXXXXXXXXXXXXXXXXXXXXX	RQS(0.262)S(0.331)S(0.331)Y(0.074)EDPWKIT(0.001)DEQR	RQS(-1.01)S(0)S(0)Y(-6.48)EDPWKIT(-25.63)DEQR	5	3	-0.37863	0	0	0	0	0	0	0	0	0	0	0	0	0	0	0	0	0	0	274	274	2251	2473			32046	31556	Service_Sonenberg_150119_3
O54916	559	O54916	O54916	RalBP1-associated Eps domain-containing protein 1	Reps1		0.476677	0	0.00421877	64.757	44.617	57.281		S	APPPPPPRPQPSHSRSSSLDMNRTFAVTTGQ	X;X;X;X;X;X;X;X;X;X;X;X;X;X;X;Phospho (STY);X;X;X;X;X;X;X;X;X;X;X;X;X;X;X	XXXXXXXXXXXXXXXPPPPPPPPXXXXXXXX	S(0.477)S(0.477)S(0.047)LDMNR	S(0)S(0)S(-10.09)LDMNR	1	2	0.24694	0	0	0	0	0	0	0	0	0	0	0	0	0	0	0	0	0	0	559	559	2884	3175			41677	42266	Service_Sonenberg_150119_5
O54916	560	O54916	O54916	RalBP1-associated Eps domain-containing protein 1	Reps1		0.476677	0	0.00421877	64.757	44.617	57.281		S	PPPPPPRPQPSHSRSSSLDMNRTFAVTTGQQ	X;X;X;X;X;X;X;X;X;X;X;X;X;X;X;X;X;X;X;X;X;X;X;X;X;X;X;X;X;X;X	XXXXXXXXXXXXXXXXXXXXXXXXXXXXXXX	S(0.477)S(0.477)S(0.047)LDMNR	S(0)S(0)S(-10.09)LDMNR	2	2	0.24694	0	0	0	0	0	0	0	0	0	0	0	0	0	0	0	0	0	0	560	560	2884	3175			41677	42266	Service_Sonenberg_150119_5
O54916	561	O54916	O54916	RalBP1-associated Eps domain-containing protein 1	Reps1		0.944508	15.3201	0.00374699	118.5	57.585	72.879	1	S	PPPPPRPQPSHSRSSSLDMNRTFAVTTGQQQ	X;X;X;X;X;X;X;X;X;X;X;X;X;X;X;Phospho (STY);X;X;X;X;X;X;X;X;X;X;X;X;X;X;X	XXXXXXXXXXXXXPPPPPPPPXXXXXXXXXX	S(0.028)S(0.028)S(0.945)LDMNR	S(-15.32)S(-15.32)S(15.32)LDMNR	3	2	-0.1099	6341500	1650400	4024600	3542900	0	2729400	6400800	0	4274600	5082000	0	3284100	0	4944700	0	2283600	0	2179300	561	561	2884	3175	41674;41675;41676;41678;41680;41681;41683;41685;41687;41689;41690;41691	42261;42262;42263;42264;42265;42267;42268;42270;42271;42272;42273;42274;42276;42277;42279;42280;42282;42284	41680	42270	Service_Sonenberg_150119_9
O54940	114	O54940	O54940	BCL2/adenovirus E1B 19 kDa protein-interacting protein 2	Bnip2		0.897042	9.5276	1.65489e-13	93.062	82.404	69.03	1	S	DDLPKPKTTEVIRKGSITEYTATEEKGDGRR	X;X;X;X;X;X;X;X;X;X;X;X;X;X;X;Phospho (STY);X;X;X;X;X;X;X;X;X;X;X;X;X;X;X	XXXXXXXXXXXXXPPPPPPPPPPPPPPPPPX	KGS(0.897)IT(0.1)EY(0.002)T(0.001)ATEEKGDGR	KGS(9.53)IT(-9.53)EY(-27.61)T(-28.17)AT(-45.7)EEKGDGR	3	3	-0.47206	5484600	0	0	0	0	0	5555300	0	3097900	5417200	4024800	0	4622400	0	4281900	3525600	8280700	4101100	114	114	1342;1343	1456;1457	18795;18796;18797;18798;18799;18800;18801;18802;18803;18804;18806;18810;18820	18921;18924;18925;18926;18934;18935;18936;18955;18956	18810	18934	Service_Sonenberg_150119_6
O54988	775	O54988	O54988	STE20-like serine/threonine-protein kinase	Slk		0.479331	0	0.000184464	47.639	32.252	47.639		S	DLNLSISSFLSKAKDSGSVSLQETRRQKKTL	X;X;X;X;X;X;X;X;X;X;X;X;X;X;X;Phospho (STY);X;X;X;X;X;X;X;X;X;X;X;X;X;X;X	XXXXXXXXXXXXPPPPPPPPPPPPPXXXXXX	AKDS(0.479)GS(0.479)VS(0.041)LQETR	AKDS(0)GS(0)VS(-10.65)LQET(-42.34)R	4	3	-0.21502	0	0	0	0	0	0	0	0	0	0	0	0	0	0	0	0	0	0	775	775	134	142			1899	1942	Service_Sonenberg_150119_2
O54988	777	O54988	O54988	STE20-like serine/threonine-protein kinase	Slk		0.846079	10.6834	0.000184464	57.414	47.182	47.621	1	S	NLSISSFLSKAKDSGSVSLQETRRQKKTLKK	X;X;X;X;X;X;X;X;X;X;X;X;X;X;X;Phospho (STY);X;X;X;X;X;X;X;X;X;X;X;X;X;X;X	XXXXXXXXXXPPPPPPPPPPPPPXXXXXXXX	AKDS(0.072)GS(0.846)VS(0.072)LQET(0.009)R	AKDS(-10.68)GS(10.68)VS(-10.68)LQET(-19.57)R	6	2	0.06852	3609800	2609100	1830600	872220	1377700	1258000	3572400	2305600	2498500	1423700	2163800	1643400	1269000	2306100	1752100	444890	974090	955940	777	777	134	142	1900;1901;1902;1904;1905;1906;1907;1909;1910;1913;1914;1916;1918;1920;1921;1923;1924;1926;1927;1929;1930;1932	1943;1944;1945;1946	1901	1944	Service_Sonenberg_150119_3
O55022	181	O55022	O55022	Membrane-associated progesterone receptor component 1	Pgrmc1		0.9934	22.6155	4.58842e-18	79.762	72.569	79.762	1	S	HVGKLLKEGEEPTVYSDDEEPKDETARKNE_	X;X;X;X;X;X;X;X;X;X;X;X;X;X;X;Phospho (STY);X;X;X;X;X;X;X;X;X;X;X;X;X;X;X	XXXXPPPPPPPPPPPPPPPPPPPPPPPPXXX	EGEEPT(0.005)VY(0.001)S(0.993)DDEEPKDETAR	EGEEPT(-22.62)VY(-29.34)S(22.62)DDEEPKDET(-55.36)AR	9	3	0.12934	100060000	64396000	0	0	96808000	86926000	167590000	109330000	0	147450000	0	0	0	181680000	0	131380000	0	96847000	181	181	614;615;1607	669;670;1747	8614;8615;8616;8618;8619;8620;8621;8622;8623;8624;8625;8626;8627;8628;8629;8630;8631;22935;22936;22937	9413;9414;9415;9416;9417;9418;9420;9421;9422;9423;9424;9425;9426;9427;9428;9429;9430;9431;9432;9433;9434;9435;9436;9437;9438;9439;23166;23167	8615	9417	Service_Sonenberg_150119_2
O55028	31	O55028	O55028	[3-methyl-2-oxobutanoate dehydrogenase [lipoamide]] kinase, mitochondrial	Bckdk		0.468546	0	8.2903e-06	82.651	67.458	66.262		S	SLWPLLGSSLSLRARSTSATDTHHVELARER	X;X;X;X;X;X;X;X;X;X;X;X;X;X;X;Phospho (STY);X;X;X;X;X;X;X;X;X;X;X;X;X;X;X	XXXXXXXXXXXXXXXPPPPPPPPPPPPPPXX	S(0.469)T(0.469)S(0.056)AT(0.007)DTHHVELAR	S(0)T(0)S(-9.24)AT(-18.26)DT(-35.39)HHVELAR	1	2	-0.16268	0	0	0	0	0	0	0	0	0	0	0	0	0	0	0	0	0	0	31	31	2954	3250			42750	43472	Service_Sonenberg_150119_1
O55028	33	O55028	O55028	[3-methyl-2-oxobutanoate dehydrogenase [lipoamide]] kinase, mitochondrial	Bckdk		0.52971	4.63501	9.409e-06	76.262	63.125	57.328	1	S	WPLLGSSLSLRARSTSATDTHHVELARERSK	X;X;X;X;X;X;X;X;X;X;X;X;X;X;X;Phospho (STY);X;X;X;X;X;X;X;X;X;X;X;X;X;X;X	XXXXXXXXXXXXXPPPPPPPPPPPPPPXXXX	S(0.182)T(0.182)S(0.53)AT(0.102)DT(0.004)HHVELAR	S(-4.64)T(-4.64)S(4.64)AT(-7.17)DT(-20.88)HHVELAR	3	2	0.067268	0	0	0	0	0	0	0	0	0	0	0	0	0	0	0	2919300	0	0	33	33	2954	3250	42777	43526;43527	42777	43527	Service_Sonenberg_150119_16
O55098	513	O55098	O55098	Serine/threonine-protein kinase 10	Stk10		0.986197	19.2732	0.00535175	54.023	28.681	54.023	1	S	GTSLSADLSLNKETGSLSLKGSKLHNKTLKR	X;X;X;X;X;X;X;X;X;X;X;X;X;X;X;Phospho (STY);X;X;X;X;X;X;X;X;X;X;X;X;X;X;X	XXXXXXXXXXXXPPPPPPPPPPPXXXXXXXX	ET(0.012)GS(0.986)LS(0.002)LKGSK	ET(-19.27)GS(19.27)LS(-26.69)LKGS(-44.74)K	4	2	-0.50211	2027800	2043900	0	0	0	1220500	2464500	1492400	2195000	1213500	1551700	1094100	1486500	1922500	1505000	425750	1411900	774440	513	513	755	823	10624;10625;10626;10627;10628;10629;10630;10631;10632;10633;10634;10635;10636;10637;10638	11382;11383;11384;11385;11386;11387;11388;11389;11390;11391;11392	10629	11389	Service_Sonenberg_150119_12
O55098	20	O55098	O55098	Serine/threonine-protein kinase 10	Stk10		0.998377	27.8886	0.0025401	54.198	43.872	42.095	1	S	NFRRILRLSTFEKRKSREYEHVRRDLDPNDV	X;X;X;X;X;X;X;X;X;X;X;X;X;X;X;Phospho (STY);X;X;X;X;X;X;X;X;X;X;X;X;X;X;X	XXXXXXXXXXXXXXXPPPPPPPPPXXXXXXX	S(0.998)REY(0.002)EHVRR	S(27.89)REY(-27.89)EHVRR	1	3	0.27582	8340300	14344000	9844800	0	0	0	4704900	0	0	2305800	0	0	0	3869800	1869000	1819400	0	1378600	20	20	2785;2786	3065;3066	40001;40003;40004;40005;40006;40007;40008;40009;40010;40011;40012;40013;40014;40015;40016;40017;40018	40273;40275;40276;40277;40278;40279;40280;40281;40282	40006	40276	Service_Sonenberg_150119_2
O55098	416	O55098	O55098	Serine/threonine-protein kinase 10	Stk10		0.999086	30.3876	0.00293577	71.03	41.263	48.284	1	S	NDLKVPVPLRKSRPLSMDARIQMDEEKQIPD	X;X;X;X;X;X;X;X;X;X;X;X;X;X;X;Phospho (STY);Oxidation (M);X;X;X;X;X;X;X;X;X;X;X;X;X;X	XXXXXXXXXXXPPPPPPPPPXXXXXXXXXXX	S(0.001)RPLS(0.999)MDAR	S(-30.39)RPLS(30.39)MDAR	5	2	0.14376	4922500	4895300	4634000	0	5792000	4000200	15067000	5008600	8496800	9835500	5063600	2071900	0	6951800	0	1689200	5047900	4945900	416	416	2794	3074;3075	40145;40146;40147;40148;40149;40150;40151;40152;40153;40154;40155;40156;40157;40158;40159;40160;40161;40162	40490;40491;40492;40493;40494;40495;40496;40497;40498;40499;40500;40501;40502;40503;40504;40505;40506;40507	40145	40490	Service_Sonenberg_150119_1
O55131	422	O55131	O55131	Septin-7	2019-09-07		0.375588	0.802706	3.64425e-05	62.088	62.088	44.601		S	KANWEAQQRILEQQNSSRTLEKNKKKGKIF_	X;X;X;X;X;X;X;X;X;X;X;X;Deamidation (NQ);X;X;Phospho (STY);X;X;X;X;X;X;X;X;X;X;X;X;X;X;X	XXXXXXXXXPPPPPPPPPPPPPPPXXXXXXX	ILEQQNS(0.376)S(0.312)RT(0.312)LEK	ILEQQNS(0.8)S(-0.8)RT(-0.8)LEK	7	3	-0.52511	0	0	0	0	0	0	0	0	0	0	0	0	0	0	0	0	0	0	422	422	1227;1228	1332;1333;1334;1335			17160	17580	Service_Sonenberg_150119_6
O55131	423	O55131	O55131	Septin-7	2019-09-07		0.484798	0	9.90548e-23	116.58	96.297	116.58		S	ANWEAQQRILEQQNSSRTLEKNKKKGKIF__	X;X;X;X;X;X;X;X;X;X;X;X;X;X;X;Phospho (STY);X;X;X;X;X;X;X;X;X;X;X;X;X;X;X	XXXXXXXXPPPPPPPPPPPPPPPXXXXXXXX	ILEQQNS(0.03)S(0.485)RT(0.485)LEKNK	ILEQQNS(-12.03)S(0)RT(0)LEKNK	8	2	0.44863	0	0	0	0	0	0	0	0	0	0	0	0	0	0	0	0	0	0	423	423	1227;1228	1332;1333;1334;1335			17195	17613	Service_Sonenberg_150119_10
O55143	663	O55143	O55143	Sarcoplasmic/endoplasmic reticulum calcium ATPase 2	Atp2a2		0.994392	22.4871	2.13528e-07	71.085	52.507	52.693	1	S	TSKAFTGREFDELSPSAQRDACLNARCFARV	X;X;X;X;X;X;X;X;X;X;X;X;X;X;X;Phospho (STY);X;X;X;X;X;X;X;X;X;X;X;X;X;X;X	XXXPPPPPPPPPPPPPPPPXXXXXXXXXXXX	EFDELS(0.006)PS(0.994)AQR	EFDELS(-22.49)PS(22.49)AQR	8	2	-0.75632	5238300	1938300	4986800	0	1937400	1880900	0	1705200	3364200	3631600	0	2220600	0	1454900	3156400	1910400	2670700	3828000	663	663	82;604	87;658	1056;8446;8447;8448;8449;8450;8451;8452;8453;8454;8455;8456;8457;8458;8459;8460	1039;9272;9273;9274;9275;9276;9277;9278;9279;9280	8452	9280	Service_Sonenberg_150119_16
O55229	39	O55229	O55229	Choline/ethanolamine kinase	Chkb		0.499759	0	0.0076241	73.233	6.5413	73.233		S	QDAKCPEPIPNRRRASSLSRDAQRRAYQWCR	X;X;X;X;X;X;X;X;X;X;X;X;X;X;X;Phospho (STY);X;X;X;X;X;X;X;X;X;X;X;X;X;X;X	XXXXXXXXXXXXXPPPPPPPXXXXXXXXXXX	RAS(0.5)S(0.5)LSR	RAS(0)S(0)LS(-30.15)R	3	2	1.0676	0	0	0	0	0	0	0	0	0	0	0	0	0	0	0	0	0	0	39	39	2049	2254			29147	28543	Service_Sonenberg_150119_3
O55229	40	O55229	O55229	Choline/ethanolamine kinase	Chkb		0.499759	0	0.0076241	73.233	6.5413	73.233		S	DAKCPEPIPNRRRASSLSRDAQRRAYQWCRE	X;X;X;X;X;X;X;X;X;X;X;X;X;X;X;X;X;X;X;X;X;X;X;X;X;X;X;X;X;X;X	XXXXXXXXXXXXXXXXXXXXXXXXXXXXXXX	RAS(0.5)S(0.5)LSR	RAS(0)S(0)LS(-30.15)R	4	2	1.0676	0	0	0	0	0	0	0	0	0	0	0	0	0	0	0	0	0	0	40	40	2049	2254			29147	28543	Service_Sonenberg_150119_3
O70145	315	O70145	O70145	Neutrophil cytosol factor 2	Ncf2		0.354138	0.777809	4.81781e-09	40.407	33.376	40.407		S	RIHPQSQPQEDTSPESDIPPPPNSSPPGRLQ	X;X;X;X;X;X;X;X;X;X;X;X;X;X;X;Phospho (STY);X;X;X;X;X;X;Deamidation (NQ);Phospho (STY);X;X;X;X;X;X;X	XPPPPPPPPPPPPPPPPPPPPPPPPPPPPXX	IHPQS(0.071)QPQEDT(0.28)S(0.296)PES(0.354)DIPPPPNS(0.514)S(0.485)PPGR	IHPQS(-7.05)QPQEDT(-1.03)S(-0.78)PES(0.78)DIPPPPNS(0.26)S(-0.26)PPGR	15	3	1.559	0	0	0	0	0	0	0	0	0	0	0	0	0	0	0	0	0	0	315	315	1209	1314			16944	17475	Service_Sonenberg_150119_6
O70145	323	O70145	O70145	Neutrophil cytosol factor 2	Ncf2		0.514186	0.261462	4.81781e-09	40.407	33.376	40.407	2	S	QEDTSPESDIPPPPNSSPPGRLQLSPGHKQK	X;X;X;X;X;X;X;Phospho (STY);X;X;X;X;X;X;Deamidation (NQ);Phospho (STY);X;X;X;X;X;X;X;X;Phospho (STY);X;X;X;X;X;X	PPPPPPPPPPPPPPPPPPPPPXXXXXXXXXX	IHPQS(0.071)QPQEDT(0.28)S(0.296)PES(0.354)DIPPPPNS(0.514)S(0.485)PPGR	IHPQS(-7.05)QPQEDT(-1.03)S(-0.78)PES(0.78)DIPPPPNS(0.26)S(-0.26)PPGR	23	3	1.559	0	0	0	2846800	0	2737900	1019500	790750	622180	1955100	0	1485900	630510	506580	656880	0	0	0	323	323	1209	1314	16944;16945;16946;16947;16948;16949;16950;16951;16952;16953	17475	16944	17475	Service_Sonenberg_150119_6
O70145	332	O70145	O70145	Neutrophil cytosol factor 2	Ncf2		1	53.168	1.06159e-06	95.608	78.212	53.168	1	S	IPPPPNSSPPGRLQLSPGHKQKEPKELKLSV	X;X;X;X;X;Deamidation (NQ);Phospho (STY);X;X;X;X;X;X;X;X;Phospho (STY);X;X;X;X;X;X;X;X;X;X;X;X;X;X;X	XXXXXXXXXXXXPPPPPPPPPPPPPXXXXXX	LQLS(1)PGHKQKEPK	LQLS(53.17)PGHKQKEPK	4	2	-0.31559	10048000	8438100	13381000	18669000	30643000	14509000	30241000	5830100	20757000	15817000	15687000	0	284010	13615000	1215700	0	29991000	43782000	332	332	1634;1635	1774;1775	23203;23204;23205;23206;23207;23208;23209;23210;23211;23212;23213;23214;23215;23216;23217;23218;23219;23220;23221;23222;23223;23224;23225;23226	23396;23397;23398;23399;23400;23401;23402;23403;23404;23405;23406;23407;23408;23409;23410;23411;23412;23413;23414;23415;23416;23417;23418;23419;23420;23421;23422;23423;23424;23425;23426;23427;23428;23429	23222	23429	Service_Sonenberg_150119_7
O70161	554	O70161	O70161	Phosphatidylinositol 4-phosphate 5-kinase type-1 gamma	Pip5k1c		0.627183	5.26928	9.35716e-07	52.97	38.317	40.819	1	S	PSDTSEQPRYRRRTQSSGQDGRPQEEPHAED	X;X;X;X;X;X;X;X;X;X;X;X;X;X;X;Phospho (STY);X;X;X;X;X;X;X;X;X;X;X;X;X;X;X	XXXXXXXXXXXXPPPPPPPPPPPPPPPPPPP	RT(0.186)QS(0.627)S(0.186)GQDGRPQEEPHAEDLQK	RT(-5.27)QS(5.27)S(-5.27)GQDGRPQEEPHAEDLQK	4	3	-0.95431	0	0	0	0	0	0	0	0	6883700	0	0	0	0	0	0	0	0	0	554	554	2334	2563	33398	32900;32901	33398	32901	Service_Sonenberg_150119_9
O70161	555	O70161	O70161	Phosphatidylinositol 4-phosphate 5-kinase type-1 gamma	Pip5k1c		0.372829	0.751543	1.07597e-06	52.707	34.409	52.707		S	SDTSEQPRYRRRTQSSGQDGRPQEEPHAEDL	X;X;X;X;X;X;X;X;X;X;X;X;X;X;X;Phospho (STY);X;X;X;X;X;X;X;X;X;X;X;X;X;X;X	XXXXXXXXXXXPPPPPPPPPPPPPPPPPPPP	RT(0.314)QS(0.314)S(0.373)GQDGRPQEEPHAEDLQK	RT(-0.75)QS(-0.75)S(0.75)GQDGRPQEEPHAEDLQK	5	4	-1.5187	0	0	0	0	0	0	0	0	0	0	0	0	0	0	0	0	0	0	555	555	2334	2563			33395	32897	Service_Sonenberg_150119_6
O70310	83	O70310	O70310	Glycylpeptide N-tetradecanoyltransferase 1	Nmt1		0.899321	9.50975	0.00382278	70.028	55.362	70.028	1	S	GSDMESTQDQPVKMTSLPAERIQEIQKAIEL	X;X;X;X;X;X;X;X;X;X;X;X;X;X;X;Phospho (STY);X;X;X;X;X;X;X;X;X;X;X;X;X;X;X	XXXXXXXXXXXXXPPPPPPPPXXXXXXXXXX	MT(0.101)S(0.899)LPAER	MT(-9.51)S(9.51)LPAER	3	2	0.11835	0	0	0	0	0	1024800	0	0	0	4391400	2296200	2451900	0	0	0	1064200	1621500	962250	83	83	1745	1908	24628;24629;24630;24631;24632;24633;24634	24491;24492;24493	24628	24492	Service_Sonenberg_150119_10
O70310	44	O70310	O70310	Glycylpeptide N-tetradecanoyltransferase 1	Nmt1		0.593438	1.64306	0.00159722	47.915	30.694	47.712	1	S	HCSDCENEEDNSHNRSGLSPANDTGAKKKKK	X;X;X;X;X;X;X;X;X;X;X;X;X;X;X;Phospho (STY);X;X;X;X;X;X;X;X;X;X;X;X;X;X;X	XXXXXXXXXXXXXXXPPPPPPPPPPPPXXXX	S(0.593)GLS(0.407)PANDTGAK	S(1.64)GLS(-1.64)PANDT(-40.43)GAK	1	2	-0.25279	0	0	0	17971000	13277000	12876000	0	10844000	15623000	14490000	0	16518000	24011000	0	19069000	17862000	0	0	44	44	2519;2520	2771;2772	36234;36235;36236;36238;36239;36240;36241;36242;36244;36245	36331;36332;36333;36335;36336;36337;36338;36339;36340;36343;36344	36242	36340	Service_Sonenberg_150119_13
O70310	47	O70310	O70310	Glycylpeptide N-tetradecanoyltransferase 1	Nmt1		0.98304	17.6316	1.52319e-09	101.45	83.619	84.169	1	S	DCENEEDNSHNRSGLSPANDTGAKKKKKKQK	X;X;X;X;X;X;X;X;X;X;X;X;X;X;X;Phospho (STY);X;X;X;X;X;X;X;X;X;X;X;X;X;X;X	XXXXXXXXXXXXPPPPPPPPPPPPPXXXXXX	S(0.017)GLS(0.983)PANDTGAK	S(-17.63)GLS(17.63)PANDT(-64.39)GAK	4	2	0.48204	3539300	1567400	0	0	0	1930600	4131300	1648500	2390100	2741900	3123200	2489900	3327800	4278900	2895300	2455500	3292000	1010100	47	47	2519;2520	2771;2772	36231;36232;36233;36237;36243;36246;36247;36248;36249;36250;36251;36252;36253;36254;36255;36256;36257;36258;36259;36260;36261;36262;36263	36323;36324;36325;36326;36327;36328;36329;36330;36334;36341;36342;36345;36346;36347;36348	36233	36329	Service_Sonenberg_150119_3
O70318	38	O70318	O70318	Band 4.1-like protein 2	Epb41l2		0.990838	20.7226	6.36993e-44	79.071	70.234	79.071	1	S	SKEKAKEVENEQTPVSEPEEEKGSQPGPPVE	X;X;X;X;X;X;X;X;X;X;X;X;X;X;X;Phospho (STY);X;X;X;X;X;X;X;X;X;X;X;X;X;X;X	XXXXPPPPPPPPPPPPPPPPPPPPPPPPPPP	AKEVENEQT(0.008)PVS(0.991)EPEEEKGS(0.001)QPGPPVER	AKEVENEQT(-20.72)PVS(20.72)EPEEEKGS(-31.08)QPGPPVER	12	3	0.25129	0	9522500	0	16516000	15074000	14051000	34875000	11036000	0	0	0	0	0	0	0	16870000	0	16656000	38	38	138	146	1954;1955;1956;1957;1958;1961;1962;1963	1958;1959;1960;1961;1962;1963;1964;1967;1968	1956	1961	Service_Sonenberg_150119_6
O70318	580	O70318	O70318	Band 4.1-like protein 2	Epb41l2		0.496978	0	1.03029e-08	76.341	61.465	76.341		S	PGVISYTTIQDGRRDSKSPTKATPLPAEGKK	X;X;X;X;X;X;X;X;X;X;X;X;X;X;X;Phospho (STY);X;X;X;X;X;X;X;X;X;X;X;X;X;X;X	XXXXXXXXXXXXXXPPPPPPPPPPPPPPPPX	DS(0.497)KS(0.497)PT(0.006)KATPLPAEGK	DS(0)KS(0)PT(-19.19)KAT(-39.16)PLPAEGK	2	2	0.33881	0	0	0	0	0	0	0	0	0	0	0	0	0	0	0	0	0	0	580	580	518	566			7267	8053	Service_Sonenberg_150119_16
O70318	582	O70318	O70318	Band 4.1-like protein 2	Epb41l2		0.848476	8.53738	1.03029e-08	76.341	61.465	44.294	1	S	VISYTTIQDGRRDSKSPTKATPLPAEGKKNT	X;X;X;X;X;X;X;X;X;X;X;X;X;X;X;Phospho (STY);X;X;X;X;X;X;X;X;X;X;X;X;X;X;X	XXXXXXXXXXXXPPPPPPPPPPPPPPPPXXX	DS(0.119)KS(0.848)PT(0.027)KAT(0.006)PLPAEGK	DS(-8.54)KS(8.54)PT(-14.95)KAT(-21.82)PLPAEGK	4	2	0.16664	0	0	816770	0	954290	1107800	0	0	0	1336000	0	0	0	0	0	0	0	0	582	582	518	566	7264;7265;7266;7270	8049;8050;8051	7264	8049	Service_Sonenberg_150119_5
O70318	698	O70318	O70318	Band 4.1-like protein 2	Epb41l2		0.999996	53.6034	0.000732617	62.891	49.082	62.891	1	S	KDESVITEEMNGKEMSPGHGPGETRKVEPVA	X;X;X;X;X;X;X;X;X;X;X;X;X;X;X;Phospho (STY);X;X;X;X;X;X;X;X;X;X;X;X;X;X;X	XXXXXXXXXXXXXPPPPPPPPPPPPXXXXXX	EMS(1)PGHGPGETR	EMS(53.6)PGHGPGET(-53.6)R	3	2	0.15516	5691000	532960	1629400	0	0	1364700	6928700	738560	2547900	6939300	5158100	3253400	0	8247400	3204000	2145900	0	4919600	698	698	693	752	9659;9660;9661;9662;9663;9664;9665;9666;9667;9668;9669;9670;9671;9672	10274;10275;10276;10277	9659	10275	Service_Sonenberg_150119_7
O70318	492	O70318	O70318	Band 4.1-like protein 2	Epb41l2		0.999817	37.3668	0.0108879	41.724	35.46	41.724		S	LWKVCVEHHTFYRLVSPEQPPKTKFLTLGSK	X;X;X;X;X;X;X;X;X;X;X;X;X;X;X;Phospho (STY);X;X;X;X;X;X;X;X;X;X;X;X;X;X;X	XXXXXXXXXXXXXPPPPPPPPPPPXXXXXXX	LVS(1)PEQPPKTK	LVS(37.37)PEQPPKT(-37.37)K	3	2	0.57349	425020	0	0	0	0	268840	0	178710	544800	749040	514780	416070	496860	880490	286160	413450	592640	437780	492	492	1690	1835	23885;23886;23887;23888;23889;23890;23891;23892;23893;23894;23895;23896;23897	24006	23885	24006	Service_Sonenberg_150119_14
O70318	86	O70318	O70318	Band 4.1-like protein 2	Epb41l2		0.999613	34.122	0.00382278	73.985	54.349	72.928	1	S	RGISRFIPPWLKKQRSYNLVVAKDGGDKKEP	X;X;X;X;X;X;X;X;X;X;X;X;X;X;X;Phospho (STY);X;X;X;X;X;X;X;X;X;X;X;X;X;X;X	XXXXXXXXXXXXXXXPPPPPPPPXXXXXXXX	S(1)YNLVVAK	S(34.12)Y(-34.12)NLVVAK	1	2	-0.4149	1862200	0	864440	793610	799870	448750	1111400	0	1103300	986170	650910	612860	1065900	462250	668560	865920	1498300	1099900	86	86	3003	3302	43425;43426;43427;43428;43429;43430;43431;43432;43433;43434;43435;43436;43437;43438;43439;43440	44197;44198;44199;44200;44201;44202;44203;44204;44205;44206;44207;44208;44209;44210;44211;44212;44213;44214;44215;44216;44217;44218;44219;44220;44221;44222;44223;44224;44225;44226;44227;44228;44229;44230;44231;44232;44233;44234	43435	44219	Service_Sonenberg_150119_13
O70338	73	O70338	O70338	Ribonuclease H1	Rnaseh1		0.245966	0	6.49847e-05	48.477	37.433	48.477		S	FKKFATEDEAWAFVRSSSSPDGSKGQESAHE	X;X;X;X;X;X;X;X;X;X;X;X;X;X;X;Phospho (STY);X;X;X;X;X;X;X;X;X;X;X;X;X;X;X	XXXXXXXXXXXXXXXPPPPPPPPPPPPPPPP	S(0.246)S(0.246)S(0.236)S(0.236)PDGS(0.036)KGQES(0.001)AHEQK	S(0)S(0)S(-0.19)S(-0.19)PDGS(-8.3)KGQES(-25.65)AHEQK	1	3	-0.82746	0	0	0	0	0	0	0	0	0	0	0	0	0	0	0	0	0	0	73	73	2909	3201			42104	42794	Service_Sonenberg_150119_6
O70338	74	O70338	O70338	Ribonuclease H1	Rnaseh1		0.245966	0	6.49847e-05	48.477	37.433	48.477		S	KKFATEDEAWAFVRSSSSPDGSKGQESAHEQ	X;X;X;X;X;X;X;X;X;X;X;X;X;X;X;X;X;X;X;X;X;X;X;X;X;X;X;X;X;X;X	XXXXXXXXXXXXXXXXXXXXXXXXXXXXXXX	S(0.246)S(0.246)S(0.236)S(0.236)PDGS(0.036)KGQES(0.001)AHEQK	S(0)S(0)S(-0.19)S(-0.19)PDGS(-8.3)KGQES(-25.65)AHEQK	2	3	-0.82746	0	0	0	0	0	0	0	0	0	0	0	0	0	0	0	0	0	0	74	74	2909	3201			42104	42794	Service_Sonenberg_150119_6
O70338	75	O70338	O70338	Ribonuclease H1	Rnaseh1		0.691058	4.55574	1.51808e-05	50.924	43.212	50.924	1	S	KFATEDEAWAFVRSSSSPDGSKGQESAHEQK	X;X;X;X;X;X;X;X;X;X;X;X;X;X;X;Phospho (STY);X;X;X;X;X;X;X;X;X;X;X;X;X;X;X	XXXXXXXXXXXXXPPPPPPPPPPPPPPPPPP	S(0.029)S(0.029)S(0.691)S(0.242)PDGS(0.01)KGQESAHEQK	S(-13.83)S(-13.83)S(4.56)S(-4.56)PDGS(-18.59)KGQES(-36.92)AHEQK	3	3	-1.0958	5891400	4479500	0	0	0	0	0	2568700	6018000	0	0	0	0	0	0	3036100	0	0	75	75	2909	3201	42103;42108;42109;42110;42111	42793	42103	42793	Service_Sonenberg_150119_2
O70338	76	O70338	O70338	Ribonuclease H1	Rnaseh1		0.417738	0	4.49149e-05	49.463	40.862	49.463		S	FATEDEAWAFVRSSSSPDGSKGQESAHEQKS	X;X;X;X;X;X;X;X;X;X;X;X;X;X;X;X;X;X;X;X;X;X;X;X;X;X;X;X;X;X;X	XXXXXXXXXXXXXXXXXXXXXXXXXXXXXXX	S(0.082)S(0.082)S(0.418)S(0.418)PDGS(0.001)KGQESAHEQK	S(-7.08)S(-7.08)S(0)S(0)PDGS(-26.82)KGQES(-40.13)AHEQK	4	3	0.29267	0	0	0	0	0	0	0	0	0	0	0	0	0	0	0	0	0	0	76	76	2909	3201			42106	42796	Service_Sonenberg_150119_12
O70400	130	O70400	O70400	PDZ and LIM domain protein 1	Pdlim1		0.872642	10.3758	0.000289568	47.532	35.739	47.532	1	S	HIGSAHNRSAMPFTASPAPSTRVITNQYNSP	X;X;X;X;X;X;X;X;X;X;X;X;X;X;X;Phospho (STY);X;X;X;X;X;X;X;X;X;X;X;X;X;X;X	XXXXXXXXPPPPPPPPPPPPPPXXXXXXXXX	SAMPFT(0.08)AS(0.873)PAPS(0.023)T(0.023)R	S(-33.37)AMPFT(-10.38)AS(10.38)PAPS(-15.7)T(-15.7)R	8	2	3.4508	490720	525060	0	0	0	0	626350	0	353400	396600	235270	0	0	0	0	0	0	0	130	130	2380	2610	34042;34043;34044;34045;34046;34047	33564	34042	33564	Service_Sonenberg_150119_7
O70404	55	O70404	O70404	Vesicle-associated membrane protein 8	Vamp8		0.552587	0.925269	0.000218298	42.338	36.306	42.338	1	S	NLDHLRNKTEDLEATSEHFKTTSQKVARKFW	X;X;X;X;X;X;X;X;X;X;X;X;X;X;X;Phospho (STY);X;X;X;X;X;X;X;X;X;X;X;X;X;X;X	XXXXXXPPPPPPPPPPPPPPXXXXXXXXXXX	NKT(0.001)EDLEAT(0.447)S(0.553)EHFK	NKT(-28.08)EDLEAT(-0.93)S(0.93)EHFK	10	3	-0.20892	0	0	0	0	0	7094100	0	0	0	0	0	0	0	0	0	0	0	0	55	55	1816;1817	1993;1994	25861	25782	25861	25782	Service_Sonenberg_150119_6
O70405	450	O70405	O70405	Serine/threonine-protein kinase ULK1	Ulk1		0.919022	10.5595	3.05758e-09	95.067	74.78	95.067	1	S	PTQVHNYQRIEQNLQSPTQQQTARSSAIRRS	X;X;X;X;X;X;X;X;X;X;X;X;X;X;X;Phospho (STY);X;X;X;X;X;X;X;X;X;X;X;X;X;X;X	XXXXXXXXXPPPPPPPPPPPPPPPXXXXXXX	IEQNLQS(0.919)PT(0.081)QQQTAR	IEQNLQS(10.56)PT(-10.56)QQQT(-36.99)AR	7	2	1.4477	0	0	0	0	0	743290	0	0	1104800	1583700	1039700	1276100	0	776820	1042900	0	1393300	0	450	450	1196	1301	16765;16767;16768;16769;16770;16771;16772;16773	17269;17271	16765	17269	Service_Sonenberg_150119_10
O70435	250	O70435	O70435	Proteasome subunit alpha type-3	Psma3		0.999985	48.189	2.18013e-11	87.184	74.417	87.184	1	S	EAEKYAKESLKEEDESDDDNM__________	X;X;X;X;X;X;X;X;X;X;X;X;X;X;X;Phospho (STY);X;X;X;X;Oxidation (M);X;X;X;X;X;X;X;X;X;X	XXXXPPPPPPPPPPPPPPPPPXXXXXXXXXX	YAKESLKEEDES(1)DDDNM	Y(-79.05)AKES(-48.19)LKEEDES(48.19)DDDNM	12	2	-0.30483	4455300	431810	0	0	0	4971400	0	1575600	1745700	0	1848200	1867600	2247100	1785200	2046200	1630300	2836800	2373900	250	250	746;3431	813;3770	10482;10483;10484;10485;10486;10487;10488;10489;49405;49406;49407;49408;49409;49410;49411;49412;49413;49414;49415;49416;49417	11248;11249;49543;49544;49545;49546;49547	49407	49546	Service_Sonenberg_150119_8
O70439	125	O70439	O70439	Syntaxin-7	Stx7		0.65373	0	0.000168618	48.568	39.135	48.568	2	S	QAAEREKEFVARVRASSRVSGGFPEDSSKEK	X;X;X;X;X;X;X;X;X;X;X;X;X;X;X;Phospho (STY);Phospho (STY);X;X;Phospho (STY);X;X;X;X;X;X;X;X;X;X;X	XXXXXXXXXXXXXXPPPPPPPPPPPPPPPPP	AS(0.654)S(0.657)RVS(0.634)GGFPEDS(0.029)S(0.026)KEK	AS(0)S(0)RVS(0)GGFPEDS(-13.44)S(-13.92)KEK	2	2	0.2215	3049600	0	0	0	0	0	5127600	0	0	6161400	0	0	0	0	0	8708000	0	0	125	125	289;290	321;322;323	4499;4500;4502;4504	5585;5586;5588	4500	5586	Service_Sonenberg_150119_7
O70439	126	O70439	O70439	Syntaxin-7	Stx7		0.791184	5.91493	0.00030975	48.623	40.712	48.623	2	S	AAEREKEFVARVRASSRVSGGFPEDSSKEKN	X;X;X;X;X;X;X;X;X;X;X;X;X;X;Phospho (STY);Phospho (STY);X;X;Phospho (STY);X;X;X;X;X;X;X;X;X;X;X;X	XXXXXXXXXXXXXPPPPPPPPPPPPPPPPPX	AS(0.231)S(0.791)RVS(0.779)GGFPEDS(0.151)S(0.048)KEK	AS(-5.91)S(5.91)RVS(7.37)GGFPEDS(-7.37)S(-12.41)KEK	3	2	0.15722	3049600	0	0	0	0	0	5127600	3181700	0	6161400	0	0	0	0	3363500	8708000	0	0	126	126	289;290	321;322;323	4499;4500;4501;4502;4503;4504	5585;5586;5587;5588	4501	5587	Service_Sonenberg_150119_8
O70439	129	O70439	O70439	Syntaxin-7	Stx7		0.99648	27.5308	1.5818e-32	119.23	98.294	105.28	1;2	S	REKEFVARVRASSRVSGGFPEDSSKEKNLVS	X;X;X;X;X;X;X;X;X;X;X;Phospho (STY);Phospho (STY);X;X;Phospho (STY);X;X;X;X;X;X;X;X;X;X;X;X;X;X;X	XXXXXXXXXXPPPPPPPPPPPPPPPPPXXXX	AS(0.002)S(0.002)RVS(0.996)GGFPEDSSK	AS(-27.53)S(-27.53)RVS(27.53)GGFPEDS(-61.03)S(-73.66)K	6	2	-0.070015	4598800	893780	1456400	1107300	1586200	1076200	8438500	4295200	2046300	8536600	0	1246900	1234100	1975300	4789300	9644600	2530900	1760600	129	129	289;290	321;322;323	4458;4459;4460;4461;4462;4463;4464;4465;4466;4467;4468;4469;4470;4471;4472;4473;4474;4475;4476;4477;4478;4479;4481;4482;4483;4484;4485;4486;4488;4489;4490;4491;4492;4493;4494;4495;4496;4497;4498;4499;4500;4501;4502;4503;4504	5494;5495;5496;5497;5498;5499;5500;5501;5502;5503;5504;5505;5506;5507;5508;5509;5510;5511;5512;5513;5514;5515;5516;5517;5518;5519;5520;5521;5522;5523;5524;5525;5526;5527;5528;5529;5530;5531;5532;5533;5534;5535;5536;5537;5538;5539;5540;5543;5544;5545;5546;5547;5548;5549;5550;5551;5552;5553;5554;5555;5556;5558;5559;5560;5561;5562;5563;5564;5565;5566;5567;5568;5569;5570;5571;5572;5573;5574;5575;5576…	4475	5534	Service_Sonenberg_150119_18
O70439	75	O70439	O70439	Syntaxin-7	Stx7		0.829679	8.15696	0.000959303	43.68	18.904	43.68	1	S	NQLAKETDKYIKEFGSLPTTPSEQRQRKIQK	X;X;X;X;X;X;X;X;X;X;X;X;X;X;X;Phospho (STY);X;X;X;X;X;X;X;X;X;X;X;X;X;X;X	XXXXXXXXXXXXPPPPPPPPPPPPPXXXXXX	EFGS(0.83)LPT(0.036)T(0.127)PS(0.008)EQR	EFGS(8.16)LPT(-13.68)T(-8.16)PS(-20.21)EQR	4	2	0.41766	2303200	0	0	0	0	1062100	0	778200	0	2185700	1392500	0	1468700	0	0	0	0	2021900	75	75	606	660	8489;8490;8491;8492;8493;8494;8495	9296	8489	9296	Service_Sonenberg_150119_18
O70469	124	O70469	O70469	Docking protein 2	Dok2		1	108.903	4.05398e-10	138.63	82.583	108.9	1	S	IQAICLLAFPGQRKGSPGLEEKSGSPCMEEN	X;X;X;X;X;X;X;X;X;X;X;X;X;X;X;Phospho (STY);X;X;X;X;X;X;X;X;X;X;X;X;X;X;X	XXXXXXXXXXXXXPPPPPPPPPXXXXXXXXX	KGS(1)PGLEEK	KGS(108.9)PGLEEK	3	2	0.059424	73708000	76272000	61216000	67286000	54620000	46218000	95290000	43846000	54522000	102310000	79358000	48212000	67034000	121470000	72098000	47669000	63164000	44476000	124	124	1013;1346	1093;1460	13861;13862;18856;18857;18858;18859;18860;18861;18862;18863;18864;18865;18866;18867;18868;18869;18870;18871;18872;18873;18874	14191;18976;18977;18978;18979;18980;18981;18982;18983;18984;18985;18986;18987;18988;18989;18990;18991;18992;18993;18994;18995;18996;18997;18998;18999;19000;19001;19002;19003;19004;19005;19006;19007;19008;19009;19010;19011;19012;19013;19014;19015;19016;19017;19018;19019;19020	18874	19019	Service_Sonenberg_150119_18
O70480	30	O70480	O70480	Vesicle-associated membrane protein 4	Vamp4		1	58.1586	8.26839e-13	88.176	81.064	58.159	1	S	TGSVKSERRNLLEDDSDEEEDFFLRGPSGPR	X;X;X;X;X;X;X;X;X;X;X;X;X;X;X;Phospho (STY);X;X;X;X;X;X;X;X;X;X;X;X;X;X;X	XXXXXXXXPPPPPPPPPPPPPPPPPXXXXXX	RNLLEDDS(1)DEEEDFFLR	RNLLEDDS(58.16)DEEEDFFLR	8	3	1.2165	2374100	1192200	3585600	2285000	1149500	897680	1540200	1441100	1924300	1086600	1313100	1384000	2229100	0	2178800	1171600	1764100	1264200	30	30	1824;2193	2002;2412	25986;31215;31216;31217;31218;31219;31220;31221;31222;31223;31224;31225;31226;31227;31228;31229;31230;31231;31232	25896;25897;30698;30699;30700;30701;30702;30703;30704;30705;30706;30707;30708;30709;30710;30711;30712;30713;30714;30715;30716;30717;30718;30719;30720;30721;30722;30723;30724;30725;30726;30727;30728;30729;30730;30731;30732;30733;30734;30735;30736;30737;30738	31231	30738	Service_Sonenberg_150119_18
O70493	2	O70493	O70493	Sorting nexin-12	Snx12		0.999009	30.034	1.13532e-50	162.36	97.646	143.96	1	S	______________MSDTAVADTRRLNSKPQ	X;X;X;X;X;X;X;X;X;X;X;X;X;X;X;Phospho (STY);X;X;X;X;X;X;X;X;X;X;X;X;X;X;X	XXXXXXXXXXXXXXXPPPPPPPPPPXXXXXX	S(0.999)DT(0.001)AVADTRR	S(30.03)DT(-30.03)AVADT(-137.23)RR	1	2	0.34493	3111200	0	1994500	3433100	1808200	1617800	4102300	1209000	3013400	2731400	3042000	2650100	5114100	3467400	3181500	4792000	3413100	1759300	2	2	2434;2435	2677;2678	35068;35069;35070;35071;35072;35073;35074;35075;35076;35077;35078;35079;35080;35081;35082;35083;35084;35085;35086;35087;35088;35089;35090;35091;35092;35093;35094;35095;35096	35019;35020;35021;35022;35023;35024;35025;35026;35027;35028;35029;35030;35031;35032;35033;35034;35035;35036;35037;35038;35039;35040;35041;35042;35043;35044;35045;35046;35047;35048;35049;35050;35051;35052;35053;35054;35055;35056;35057;35058;35059;35060;35061;35062;35063	35088	35043	Service_Sonenberg_150119_10
O88448	574	O88448	O88448	Kinesin light chain 2	Klc2		0.583886	1.47115	0.00776582	44.447	29.912	43.124	1	S	QGGGPQEPNSRMKRASSLNFLNKSVEEPVQP	X;X;X;X;X;X;X;X;X;X;X;X;X;X;X;Phospho (STY);X;X;X;X;X;X;X;X;X;X;X;X;X;X;X	XXXXXXXXXXXXXXPPPPPPPPPXXXXXXXX	AS(0.584)S(0.416)LNFLNK	AS(1.47)S(-1.47)LNFLNK	2	2	-0.58765	0	458360	0	0	0	0	0	0	0	0	305800	0	0	0	0	0	0	0	574	574	284	316	4418;4425	5449;5458	4425	5458	Service_Sonenberg_150119_11
O88448	575	O88448	O88448	Kinesin light chain 2	Klc2		0.964745	14.372	0.00280677	58.819	40.128	58.819	1	S	GGGPQEPNSRMKRASSLNFLNKSVEEPVQPG	X;X;X;X;X;X;X;X;X;X;X;X;X;X;X;Phospho (STY);X;X;X;X;X;X;X;X;X;X;X;X;X;X;X	XXXXXXXXXXXXXPPPPPPPPPXXXXXXXXX	AS(0.035)S(0.965)LNFLNK	AS(-14.37)S(14.37)LNFLNK	3	2	0.81603	1156900	0	931950	600980	529700	0	618680	548610	605060	449340	0	0	384360	468090	456590	0	0	615020	575	575	284	316	4417;4419;4420;4421;4422;4423;4424;4426;4427;4428;4429;4430	5447;5448;5450;5451;5452;5453;5454;5455;5456;5457;5459;5460;5461	4419	5450	Service_Sonenberg_150119_3
O88448	539	O88448	O88448	Kinesin light chain 2	Klc2		0.952771	13.0478	0.032622	45.368	15.624	45.368	1	S	AEWSGDGSGSLRRSGSFGKLRDALRRSSEML	X;X;X;X;X;X;X;X;X;X;X;X;X;X;X;Phospho (STY);X;X;X;X;X;X;X;X;X;X;X;X;X;X;X	XXXXXXXXXXXXXPPPPPPPPXXXXXXXXXX	S(0.047)GS(0.953)FGKLR	S(-13.05)GS(13.05)FGKLR	3	2	0.34768	1228000	708810	0	0	0	1032700	1469000	928540	826460	1596600	617400	1186100	817530	941870	902300	1464900	851440	848780	539	539	2531	2783	36375;36376;36377;36378;36379;36380;36381;36382;36383;36384;36385;36386;36387;36388;36389	36454;36455	36376	36455	Service_Sonenberg_150119_16
O88487	86	O88487	O88487	Cytoplasmic dynein 1 intermediate chain 2	Dync1i2		0.365216	0.699327	2.38632e-23	79.022	69.1	55.885		S	TDSPIVPPPMSPSSKSVSTPSEAGSQDSGDG	X;X;X;X;X;X;X;X;X;X;X;X;X;X;X;Phospho (STY);X;X;X;X;X;X;X;X;X;X;X;X;X;X;X	XXXXXXXXXXXXXXXPPPPPPPPPPPPPPPP	S(0.365)VS(0.311)T(0.311)PS(0.013)EAGSQDSGDGAVGSR	S(0.7)VS(-0.7)T(-0.7)PS(-14.51)EAGS(-38.82)QDS(-49.26)GDGAVGS(-53.45)R	1	2	-1.2541	0	0	0	0	0	0	0	0	0	0	0	0	0	0	0	0	0	0	86	86	2993	3291			43283	44077	Service_Sonenberg_150119_4
O88487	88	O88487	O88487	Cytoplasmic dynein 1 intermediate chain 2	Dync1i2		0.457084	0	1.90251e-25	88.507	81.137	88.507		S	SPIVPPPMSPSSKSVSTPSEAGSQDSGDGAV	X;X;X;X;X;X;X;X;X;X;X;X;X;X;X;Phospho (STY);X;X;X;X;X;X;X;X;X;X;X;X;X;X;X	XXXXXXXXXXXXXPPPPPPPPPPPPPPPPPP	S(0.073)VS(0.457)T(0.457)PS(0.013)EAGSQDSGDGAVGSR	S(-7.97)VS(0)T(0)PS(-15.48)EAGS(-44.69)QDS(-70.09)GDGAVGS(-85.54)R	3	2	-0.61938	0	0	0	0	0	0	0	0	0	0	0	0	0	0	0	0	0	0	88	88	2993	3291			43287	44083	Service_Sonenberg_150119_16
O88487	91	O88487	O88487	Cytoplasmic dynein 1 intermediate chain 2	Dync1i2		0.326599	0	0.000112012	49.482	36.501	46.318		S	VPPPMSPSSKSVSTPSEAGSQDSGDGAVGSR	X;X;X;X;X;X;X;X;X;X;X;X;X;X;X;X;X;X;X;X;X;X;X;X;X;X;X;X;X;X;X	XXXXXXXXXXXXXXXXXXXXXXXXXXXXXXX	S(0.014)VS(0.327)T(0.327)PS(0.327)EAGS(0.006)QDSGDGAVGSR	S(-13.62)VS(0)T(0)PS(0)EAGS(-17.51)QDS(-32.57)GDGAVGS(-43.35)R	6	2	-1.4498	0	0	0	0	0	0	0	0	0	0	0	0	0	0	0	0	0	0	91	91	2993	3291			43289	44086	Service_Sonenberg_150119_18
O88502	375	O88502	O88502	High affinity cAMP-specific and IBMX-insensitive 3',5'-cyclic phosphodiesterase 8A	Pde8a		0.824556	6.72082	0.0133962	47.603	22.044	47.603	1	S	AVSSRTSDVSSQRRHSSLARIHSMMIEAPIT	X;X;X;X;X;X;X;X;X;X;X;X;X;X;X;Phospho (STY);X;X;X;X;X;X;X;X;X;X;X;X;X;X;X	XXXXXXXXXXXXXPPPPPPPXXXXXXXXXXX	RHS(0.825)S(0.175)LAR	RHS(6.72)S(-6.72)LAR	3	3	0.71628	0	0	0	0	0	0	632390	210210	0	0	474680	0	0	0	0	0	568080	0	375	375	2127	2340	30290;30291;30292;30293	29815	30290	29815	Service_Sonenberg_150119_11
O88508	102	O88508	O88508	DNA (cytosine-5)-methyltransferase 3A	Dnmt3a		0.99994	42.2418	7.5136e-11	67.095	48.371	67.095	1	S	NGDLEKRSEPQPEEGSPAAGQKGGAPAEGEG	X;X;X;X;X;X;X;X;X;X;X;X;X;X;X;Phospho (STY);X;X;X;X;X;X;X;X;X;X;X;X;X;X;X	XXXXXXPPPPPPPPPPPPPPPPXXXXXXXXX	SEPQPEEGS(1)PAAGQK	S(-42.24)EPQPEEGS(42.24)PAAGQK	9	2	0.82734	0	825960	0	0	3963800	1979100	0	0	6382100	0	0	0	6821200	0	6598500	0	4271900	3157700	102	102	2279;2453	2503;2696	32463;32464;32465;32466;32467;32468;32469;35283;35284;35285;35286;35287;35288;35289;35290;35291	31976;31977;35200;35201;35202;35203;35204;35205;35206;35207;35208;35209;35210	35285	35203	Service_Sonenberg_150119_5
O88532	1054	O88532	O88532	Zinc finger RNA-binding protein	Zfr		1	41.2572	3.50047e-06	84.859	67.607	41.257	1	S	NQRFNIHNNRKRRRDSDGVDGFEAEGKKDKK	X;X;X;X;X;X;X;X;X;X;X;X;X;X;X;Phospho (STY);X;X;X;X;X;X;X;X;X;X;X;X;X;X;X	XXXXXXXXXXXXXPPPPPPPPPPPPPPPXXX	RDS(1)DGVDGFEAEGKK	RDS(41.26)DGVDGFEAEGKK	3	3	-0.95469	718040	540910	0	0	0	1656200	1688800	868420	738990	2357900	1233300	2131800	671070	675750	500100	866610	0	1748600	1054	1054	2060;2061	2265;2266	29257;29258;29259;29260;29261;29262;29263;29264;29265;29266;29267;29268;29269;29270;29271;29272;29273;29274;29275;29276;29277;29278;29279;29280;29281	28631;28632;28633;28634;28635;28636	29271	28636	Service_Sonenberg_150119_12
O88587	260	O88587	O88587	Catechol O-methyltransferase	Comt		0.499744	0	0.000325247	54.023	44.63	54.023		S	KVVDGLEKAVYQGPGSSPVKS__________	X;X;X;X;X;X;X;X;X;X;X;X;X;X;X;Phospho (STY);X;X;X;X;X;X;X;X;X;X;X;X;X;X;X	XXXXXXXXPPPPPPPPPPPPPXXXXXXXXXX	AVY(0.001)QGPGS(0.5)S(0.5)PVK	AVY(-29.9)QGPGS(0)S(0)PVK	8	2	-0.039897	0	0	0	0	0	0	0	0	0	0	0	0	0	0	0	0	0	0	260	260	346;347	381;382			5079	6213	Service_Sonenberg_150119_5
O88587	261	O88587	O88587	Catechol O-methyltransferase	Comt		0.956913	13.4655	0.000325247	74.698	68.527	74.698	1	S	VVDGLEKAVYQGPGSSPVKS___________	X;X;X;X;X;X;X;X;X;X;X;X;X;X;X;Phospho (STY);X;X;X;X;X;X;X;X;X;X;X;X;X;X;X	XXXXXXXPPPPPPPPPPPPXXXXXXXXXXXX	AVYQGPGS(0.043)S(0.957)PVK	AVY(-54.56)QGPGS(-13.47)S(13.47)PVK	9	2	0.20225	981700	0	0	0	0	0	4133100	327410	2200900	5210600	1524600	0	382040	662450	0	1043700	3086100	2116700	261	261	346;347	381;382	5078;5080;5081;5082;5083;5085;5086;5088;5089;5090;5091	6212;6214;6215;6216;6217;6218;6219;6220;6221;6222;6224;6225;6226	5085	6224	Service_Sonenberg_150119_17
O88627	11	O88627	O88627	Sodium/nucleoside cotransporter 2	Slc28a2		0.466603	0.402562	6.17335e-10	46.15	40.247	46.15		S	_____MEKSKGRKSVSQATVENCMENPGLEL	X;X;X;X;X;X;X;X;X;X;X;X;X;X;X;Phospho (STY);X;X;X;X;X;X;X;X;X;X;X;X;X;X;X	XXXXXXXXXXXXXPPPPPPPPPPPPPPPPPP	S(0.425)VS(0.467)QAT(0.108)VENCMENPGLELMEGGNLEQR	S(-0.4)VS(0.4)QAT(-6.35)VENCMENPGLELMEGGNLEQR	3	3	1.2203	0	0	0	0	0	0	0	0	0	0	0	0	0	0	0	0	0	0	11	11	2990	3288			43264	44072	Service_Sonenberg_150119_2
O88643	144	O88643	O88643	Serine/threonine-protein kinase PAK 1	Pak1		0.985618	18.6559	0.0202306	56.378	47.466	56.378	1	S	EFYNSKKTSNSKKYMSFTDKSAEDYNSSNTL	X;X;X;X;X;X;X;X;X;X;X;X;X;X;X;Phospho (STY);X;X;X;X;X;X;X;X;X;X;X;X;X;X;X	XXXXXXXXXXXXXPPPPPPPXXXXXXXXXXX	Y(0.001)MS(0.986)FT(0.013)DK	Y(-30.16)MS(18.66)FT(-18.66)DK	3	2	-0.091641	348740	0	0	0	0	0	281270	120790	165220	0	95822	85831	0	96971	170290	0	144710	0	144	144	3463	3806	49833;49834;49835;49836;49837;49838;49839;49840;49841	49889	49833	49889	Service_Sonenberg_150119_7
O88738	593	O88738	O88738	Baculoviral IAP repeat-containing protein 6	Birc6		1	96.1239	0.00288147	111.74	18.31	111.74	1	S	YKSPATSPISSNSHRSLDGLSRTQGESISEQ	X;X;X;X;X;X;X;X;X;X;X;X;X;X;X;Phospho (STY);X;X;X;X;X;X;X;X;X;X;X;X;X;X;X	XXXXXXXXXXXXXXXPPPPPPPXXXXXXXXX	S(1)LDGLSR	S(96.12)LDGLS(-96.12)R	1	2	0.30918	0	0	0	0	0	0	0	0	0	0	1355900	0	0	0	0	0	2075000	0	593	593	2629	2894	37767;37768	37885;37886	37768	37886	Service_Sonenberg_150119_17
O88746	180	O88746	O88746	Target of Myb protein 1	Tom1		0.995467	24.4021	2.36672e-05	66.498	37.024	66.498	1	S	PQRTVFNSETPSRQNSVSSNTSQRGDLSQHA	X;X;X;X;X;X;X;X;X;X;X;X;X;X;X;Phospho (STY);X;X;X;X;X;X;X;X;X;X;X;X;X;X;X	XXXPPPPPPPPPPPPPPPPPPPPPXXXXXXX	QNS(0.995)VS(0.004)S(0.001)NTSQR	QNS(24.4)VS(-24.4)S(-30.97)NT(-41.8)S(-42.24)QR	3	2	-0.041017	0	0	0	0	0	585520	0	0	0	4681900	1109000	700580	0	0	0	459970	929040	249980	180	180	1987;3232	2186;3552	28320;28321;28322;28323;28324;28325;28326	27839	28320	27839	Service_Sonenberg_150119_18
O88746	405	O88746	O88746	Target of Myb protein 1	Tom1		0.855464	7.72507	0.000457429	48.44	32.684	48.44	1	S	QTTDGLAGALDARQQSTGAIPATQARIMEDI	X;X;X;X;X;X;X;X;X;X;X;X;X;X;X;Phospho (STY);X;X;X;X;X;X;X;X;X;X;X;X;X;X;X	XXXXXXXXXXXXXPPPPPPPPPPPPPXXXXX	QQS(0.855)T(0.144)GAIPATQAR	QQS(7.73)T(-7.73)GAIPAT(-39.62)QAR	3	2	-0.23606	0	0	0	0	0	1724800	0	0	0	4969700	3281500	4708000	258480	0	0	6175600	5865000	3874200	405	405	1997	2196	28417;28418;28419;28420;28421;28422;28423;28424	27906;27907	28417	27907	Service_Sonenberg_150119_10
O88845	7	O88845	O88845	A-kinase anchor protein 10, mitochondrial	Akap10		1	50.2074	0.0259501	52.555	42.503	50.207	2	S	_________MRGAGPSPRHSPRALRPDPGPA	X;X;X;X;X;X;X;X;X;X;X;X;X;X;X;Phospho (STY);X;X;X;Phospho (STY);X;X;X;X;X;X;X;X;X;X;X	XXXXXXXXXXXPPPPPPPPPPPXXXXXXXXX	GAGPS(1)PRHS(1)PR	GAGPS(50.21)PRHS(50.21)PR	5	2	-0.50411	3930100	855420	0	0	0	0	4104400	1307600	2228300	1759400	1394200	0	2349700	4221100	2209900	0	506100	469370	7	7	847	921	11846;11847;11848;11849;11850;11851;11852;11853;11854;11855;11856;11857	12400;12401;12402;12403	11849	12403	Service_Sonenberg_150119_14
O88845	11	O88845	O88845	A-kinase anchor protein 10, mitochondrial	Akap10		1	50.2074	0.0259501	52.555	42.503	50.207	2	S	_____MRGAGPSPRHSPRALRPDPGPAMSFF	X;X;X;X;X;X;X;X;X;X;X;Phospho (STY);X;X;X;Phospho (STY);X;X;X;X;X;X;X;X;X;X;X;X;X;X;X	XXXXXXXPPPPPPPPPPPXXXXXXXXXXXXX	GAGPS(1)PRHS(1)PR	GAGPS(50.21)PRHS(50.21)PR	9	2	-0.50411	3930100	855420	0	0	0	0	4104400	1307600	2228300	1759400	1394200	0	2349700	4221100	2209900	0	506100	469370	11	11	847	921	11846;11847;11848;11849;11850;11851;11852;11853;11854;11855;11856;11857	12400;12401;12402;12403	11849	12403	Service_Sonenberg_150119_14
O88845	187	O88845	O88845	A-kinase anchor protein 10, mitochondrial	Akap10		0.851896	7.95951	9.72363e-05	73.415	60.788	46.964	1	S	HSLNTVKQSSLAEPVSPSKRHETPASSVTEA	X;X;X;X;X;X;X;X;X;X;X;X;X;X;X;Phospho (STY);X;X;X;X;X;X;X;X;X;X;X;X;X;X;X	XXXXXXXPPPPPPPPPPPPPXXXXXXXXXXX	QS(0.002)S(0.01)LAEPVS(0.852)PS(0.136)KR	QS(-26.79)S(-19.29)LAEPVS(7.96)PS(-7.96)KR	9	2	-0.20298	0	0	0	0	0	1122600	1522300	373280	0	1930900	0	0	463160	946310	0	0	2143500	1231100	187	187	2016	2219	28648;28649;28650;28651;28652;28653;28654;28655	28086;28087;28088;28089;28090;28091;28092	28648	28086	Service_Sonenberg_150119_6
O88845	257	O88845	O88845	A-kinase anchor protein 10, mitochondrial	Akap10		0.808459	6.25423	3.80207e-33	70.281	52.48	61.265	1	S	GHSARSLHREVARTGSHQIPTDSQDSSSRLA	X;X;X;X;X;X;X;X;X;X;X;X;X;X;X;Phospho (STY);X;X;X;X;X;X;X;X;X;X;X;X;X;X;X	XXXXXXXXXXXXXPPPPPPPPPPPPPPPPXX	T(0.192)GS(0.808)HQIPTDSQDSSSR	T(-6.25)GS(6.25)HQIPT(-50.98)DS(-55.48)QDS(-58.88)S(-58.88)S(-58.88)R	3	2	-0.4092	0	0	0	0	0	0	0	0	0	0	0	0	0	0	0	0	0	0	257	257	3079	3387	44563;44564;44566	45524;45525;45527	44563	45524	Service_Sonenberg_150119_1
O88852	2	O88852	O88852	Testis-specific Y-encoded-like protein 1	Tspyl1		0.494093	0	0.000140571	46.797	27.698	46.797		S	______________MSSPERDEGTPVPDSRG	X;X;X;X;X;X;X;X;X;X;X;X;X;X;X;Phospho (STY);X;X;X;X;X;X;X;X;X;X;X;X;X;X;X	XXXXXXXXXXXXXXXPPPPPPPPPPPPPPPX	S(0.494)S(0.494)PERDEGT(0.012)PVPDSR	S(0)S(0)PERDEGT(-16.23)PVPDS(-40.56)R	1	2	0.98741	0	0	0	0	0	0	0	0	0	0	0	0	0	0	0	0	0	0	2	2	2860	3149			41333	41814	Service_Sonenberg_150119_9
O88852	3	O88852	O88852	Testis-specific Y-encoded-like protein 1	Tspyl1		0.494093	0	0.000140571	46.797	27.698	46.797		S	_____________MSSPERDEGTPVPDSRGH	X;X;X;X;X;X;X;X;X;X;X;X;X;X;X;X;X;X;X;X;X;X;X;X;X;X;X;X;X;X;X	XXXXXXXXXXXXXXXXXXXXXXXXXXXXXXX	S(0.494)S(0.494)PERDEGT(0.012)PVPDSR	S(0)S(0)PERDEGT(-16.23)PVPDS(-40.56)R	2	2	0.98741	0	0	0	0	0	0	0	0	0	0	0	0	0	0	0	0	0	0	3	3	2860	3149			41333	41814	Service_Sonenberg_150119_9
O88874	341	O88874	O88874	Cyclin-K	Ccnk		1	115.915	2.4946e-07	124.6	101.56	115.91	1	S	PQPSPPRQAKRAVVVSPKEENKATEPPPPPK	X;X;X;Phospho (STY);X;X;X;X;X;X;X;X;X;X;X;Phospho (STY);X;X;X;X;X;X;X;X;X;X;X;X;X;X;X	XXXXXXXXXXXPPPPPPPPPPPXXXXXXXXX	AVVVS(1)PKEENK	AVVVS(115.91)PKEENK	5	2	-0.28956	2565900	1199600	3035100	1255500	1566200	1345200	3958300	1405200	2616900	2542100	2186500	1280000	2001500	3466600	2282500	949790	1977000	1333800	341	341	345	380	5060;5061;5062;5063;5064;5065;5066;5067;5068;5069;5070;5071;5072;5073;5074;5075;5076;5077	6185;6186;6187;6188;6189;6190;6191;6192;6193;6194;6195;6196;6197;6198;6199;6200;6201;6202;6203;6204;6205;6206;6207;6208;6209;6210;6211	5075	6211	Service_Sonenberg_150119_18
O88874	325	O88874	O88874	Cyclin-K	Ccnk		1	53.3001	2.58466e-07	75.088	66.387	53.3	1;2	S	SAQQQQQQAQQPKKPSPQPSPPRQAKRAVVV	X;X;X;X;X;X;X;X;X;X;X;X;X;X;X;Phospho (STY);X;X;X;Phospho (STY);X;X;X;X;X;X;X;X;X;X;X	XXXXXXXXXXXXXPPPPPPPPPPPPPXXXXX	KPS(1)PQPS(1)PPRQAK	KPS(53.3)PQPS(53.3)PPRQAK	3	2	-0.73935	9358500	2310600	12094000	6516300	4839700	3397000	10235000	2716400	7155300	3245900	7943400	3460000	6618300	8459700	6145400	4333600	7189700	3867500	325	325	1424;1425	1546;1547;1548	20241;20242;20243;20244;20245;20248;20249;20250;20251;20253;20254;20255;20256;20257;20258;20259;20260;20261;20262;20263;20264;20265;20266;20267;20268;20269;20270;20271;20272;20273;20274;20275;20276;20277;20278;20279;20280;20281;20282;20283;20284;20285;20286;20287;20288;20289;20290;20291;20292;20293;20294;20295;20296	20747;20748;20749;20750;20751;20752;20753;20754;20755;20756;20757;20758;20759;20760;20761;20765;20766;20767;20768;20769;20771;20772;20773;20774;20775;20776;20777;20778;20779;20780;20781;20782;20783;20784;20785;20786;20787;20788;20789;20790;20791;20792;20793;20794;20795;20796;20797;20798;20799;20800;20801;20802;20803;20804;20805;20806;20807;20808;20809;20810;20811;20812;20813;20814;20815;20816;208…	20294	20846	Service_Sonenberg_150119_16
O88874	329	O88874	O88874	Cyclin-K	Ccnk		1	53.3001	0.00024117	80.69	67.111	53.3	1;2	S	QQQQAQQPKKPSPQPSPPRQAKRAVVVSPKE	X;X;X;X;X;X;X;X;X;X;X;Phospho (STY);X;X;X;Phospho (STY);X;X;X;X;X;X;X;X;X;X;X;Phospho (STY);X;X;X	XXXXXXXXXPPPPPPPPPPPPPXXXXXXXXX	KPS(1)PQPS(1)PPRQAK	KPS(53.3)PQPS(53.3)PPRQAK	7	2	-0.73935	6840300	1132700	7469200	4635100	3162900	4501700	14092000	1922600	5202300	3245900	5633900	3460000	6618300	5270900	4954100	3326200	5606100	2818900	329	329	1424;1425	1546;1547;1548	20246;20247;20252;20264;20265;20266;20267;20268;20269;20270;20271;20272;20273;20274;20275;20276;20277;20278;20279;20280;20281;20282;20283;20284;20285;20286;20287;20288;20289;20290;20291;20292;20293;20294;20295;20296	20762;20763;20764;20770;20790;20791;20792;20793;20794;20795;20796;20797;20798;20799;20800;20801;20802;20803;20804;20805;20806;20807;20808;20809;20810;20811;20812;20813;20814;20815;20816;20817;20818;20819;20820;20821;20822;20823;20824;20825;20826;20827;20828;20829;20830;20831;20832;20833;20834;20835;20836;20837;20838;20839;20840;20841;20842;20843;20844;20845;20846;20847	20294	20846	Service_Sonenberg_150119_16
O88935	427	O88935	O88935	Synapsin-1	Syn1		0.912658	11.6246	4.36887e-10	57.803	50.27	57.803	1	S	NKMTQALPRQPQRDASPGRGSHSQSSSPGAL	X;X;X;X;X;X;X;X;X;X;X;X;X;X;X;Phospho (STY);X;X;X;X;X;X;X;X;X;X;X;X;X;X;X	XXXXXXXXXXXXXPPPPPPPPPPPPPPPPPP	DAS(0.913)PGRGS(0.063)HS(0.024)QS(0.001)SSPGALTLGR	DAS(11.62)PGRGS(-11.62)HS(-15.86)QS(-31.33)S(-37.15)S(-42.49)PGALT(-56.84)LGR	3	3	-0.39248	0	0	0	0	0	0	0	3261100	0	0	1878700	0	0	0	0	0	0	0	427	427	396	433	5734;5735	7022	5734	7022	Service_Sonenberg_150119_8
O88939	331	O88939	O88939	Zinc finger and BTB domain-containing protein 7A	Zbtb7a		0.999272	32.5727	6.23979e-05	90.689	57.829	90.689	1	S	TLLQQMMSSVGRAGDSDEESRTDDKGVMDYY	X;X;X;X;X;X;X;X;X;X;X;X;X;X;X;Phospho (STY);X;X;X;X;X;X;X;X;X;X;X;X;X;X;X	XXXXXXXXXXXXPPPPPPPPPPPPPXXXXXX	AGDS(0.999)DEES(0.001)RTDDK	AGDS(32.57)DEES(-32.57)RT(-37.55)DDK	4	2	-0.24867	0	0	0	0	0	490910	1823400	608540	586430	1823000	1475700	911450	837740	1361000	1099000	0	0	904860	331	331	86	91	1104;1105;1106;1107;1108;1109;1110;1111;1112;1113;1114	1079;1080	1104	1079	Service_Sonenberg_150119_11
O88939	537	O88939	O88939	Zinc finger and BTB domain-containing protein 7A	Zbtb7a		0.998601	28.5364	1.61651e-45	123.12	116.09	111.6	1	S	QEKHFKDEEEDEEEASPDGSGRLNVAGSGGD	X;X;X;X;X;X;X;X;X;X;X;X;X;X;X;Phospho (STY);X;X;X;X;X;X;X;X;X;X;X;X;X;X;X	XXXPPPPPPPPPPPPPPPPPPPXXXXXXXXX	HFKDEEEDEEEAS(0.999)PDGS(0.001)GR	HFKDEEEDEEEAS(28.54)PDGS(-28.54)GR	13	3	0.27809	5823700	2237500	2988200	0	0	2861200	4646600	2535700	2984200	2719500	2861200	2066800	4196000	3204500	3843800	1462800	2938300	1299800	537	537	1084	1173	14948;14949;14950;14951;14952;14953;14954;14955;14956;14957;14958;14959;14960;14961;14962;14963	15394;15395;15396;15397;15398;15399;15400;15401;15402;15403;15404;15405;15406;15407;15408;15409;15410;15411;15412	14954	15402	Service_Sonenberg_150119_10
O89110	188	O89110	O89110	Caspase-8;Caspase-8 subunit p18;Caspase-8 subunit p10	Casp8		1	71.6136	8.964e-56	112.11	55.673	71.614	1	S	GKIEDYERSSTERRMSLEGREELPPSVLDEM	X;X;X;X;X;X;X;X;X;X;X;X;X;X;X;Phospho (STY);X;X;X;X;X;X;X;X;X;X;X;X;X;X;X	XXXXXXXXXXXXXPPPPPPPXXXXXXXXXXX	RMS(1)LEGR	RMS(71.61)LEGR	3	2	0.26534	3775700	2740800	4483700	3923300	2855400	2729600	3949100	0	2544100	0	0	0	3161400	3216800	0	0	6312300	0	188	188	2189	2407	31170;31171;31172;31173;31174;31175;31176;31177;31178;31179;31180;31181;31182;31183;31184;31185;31186;31187	30670;30671;30672;30673;30674;30675;30676;30677;30678;30679;30680;30681	31180	30681	Service_Sonenberg_150119_18
P00520	717	P00520	P00520	Tyrosine-protein kinase ABL1	Abl1		0.582954	1.4954	0.000651782	64.711	59.731	64.711	1	S	EESGMSSSKRFLRSCSASCMPHGARDTEWRS	X;X;X;X;X;X;X;X;X;X;X;X;X;X;X;Phospho (STY);X;X;X;X;X;X;X;X;X;X;X;X;X;X;X	XXXXXXXXXXXXXPPPPPPPPPPPPXXXXXX	S(0.413)CS(0.583)AS(0.004)CMPHGAR	S(-1.5)CS(1.5)AS(-21.74)CMPHGAR	3	2	-1.0253	0	0	0	0	0	647390	1001200	0	0	1754100	1336600	1453300	833820	0	0	697760	1132700	0	717	717	2416	2656	34804;34805;34806;34807;34808;34809;34810;34811	34685	34804	34685	Service_Sonenberg_150119_12
P01896;P01899;P01897	160;350;350	P01896	P01896	H-2 class I histocompatibility antigen, alpha chain;H-2 class I histocompatibility antigen, D-B alpha chain;H-2 class I histocompatibility antigen, L-D alpha chain	H2-D1;H2-L		0.323328	0	0.000350307	45.438	35.592	45.438		S	RNTGGKGGDYALAPGSQSSEMSLRDCKGDTL	X;X;X;X;X;X;X;X;X;X;X;X;X;X;X;Phospho (STY);X;X;X;X;X;X;X;X;X;X;X;X;X;X;X	XXXXXXPPPPPPPPPPPPPPPPPPXXXXXXX	GGDYALAPGS(0.323)QS(0.323)S(0.323)EMS(0.03)LR	GGDY(-33.02)ALAPGS(0)QS(0)S(0)EMS(-10.35)LR	10	2	0.42134	0	0	0	0	0	0	0	0	0	0	0	0	0	0	0	0	0	0	160	160	891	965			12357	12979	Service_Sonenberg_150119_1
P01896;P01899;P01897	162;352;352	P01896	P01896	H-2 class I histocompatibility antigen, alpha chain;H-2 class I histocompatibility antigen, D-B alpha chain;H-2 class I histocompatibility antigen, L-D alpha chain	H2-D1;H2-L		0.323328	0	0.000350307	45.438	35.592	45.438		S	TGGKGGDYALAPGSQSSEMSLRDCKGDTLGS	X;X;X;X;X;X;X;X;X;X;X;X;X;X;X;X;X;X;X;X;X;X;X;X;X;X;X;X;X;X;X	XXXXXXXXXXXXXXXXXXXXXXXXXXXXXXX	GGDYALAPGS(0.323)QS(0.323)S(0.323)EMS(0.03)LR	GGDY(-33.02)ALAPGS(0)QS(0)S(0)EMS(-10.35)LR	12	2	0.42134	0	0	0	0	0	0	0	0	0	0	0	0	0	0	0	0	0	0	162	162	891	965			12357	12979	Service_Sonenberg_150119_1
P01896;P01899;P01897	163;353;353	P01896	P01896	H-2 class I histocompatibility antigen, alpha chain;H-2 class I histocompatibility antigen, D-B alpha chain;H-2 class I histocompatibility antigen, L-D alpha chain	H2-D1;H2-L		0.323328	0	0.000350307	45.438	35.592	45.438		S	GGKGGDYALAPGSQSSEMSLRDCKGDTLGSD	X;X;X;X;X;X;X;X;X;X;X;X;X;X;X;X;X;X;X;X;X;X;X;X;X;X;X;X;X;X;X	XXXXXXXXXXXXXXXXXXXXXXXXXXXXXXX	GGDYALAPGS(0.323)QS(0.323)S(0.323)EMS(0.03)LR	GGDY(-33.02)ALAPGS(0)QS(0)S(0)EMS(-10.35)LR	13	2	0.42134	0	0	0	0	0	0	0	0	0	0	0	0	0	0	0	0	0	0	163	163	891	965			12357	12979	Service_Sonenberg_150119_1
P01901;P14428;P03991;P01902;P04223	367;326;366;366;367	P01901	P01901	H-2 class I histocompatibility antigen, K-B alpha chain;H-2 class I histocompatibility antigen, K-Q alpha chain;H-2 class I histocompatibility antigen, K-W28 alpha chain;H-2 class I histocompatibility antigen, K-D alpha chain;H-2 class I histocompatibility antigen, K-K alpha chain	H2-K1		1	43.3077	0.00353616	52.278	52.278	43.308	1	S	DLSLPDCKVMVHDPHSLA_____________	X;X;X;X;X;X;X;X;X;X;X;X;X;X;X;Phospho (STY);X;X;X;X;X;X;X;X;X;X;X;X;X;X;X	XXXXXXXXPPPPPPPPPPXXXXXXXXXXXXX	VMVHDPHS(1)LA	VMVHDPHS(43.31)LA	8	2	-0.52209	795770	1692400	3035400	0	4162400	0	0	1245600	2774000	10420000	3050700	0	0	1217300	414540	0	0	0	367	367	3346	3680	48399;48400;48401;48402;48403;48404;48405;48406;48407;48408	48804;48805;48806;48807	48402	48807	Service_Sonenberg_150119_10
P04627;Q99N57	580;621	P04627;Q99N57	Q99N57	Serine/threonine-protein kinase A-Raf;RAF proto-oncogene serine/threonine-protein kinase	Araf;Raf1		0.999902	40.1561	0.000422492	112.75	95.363	111.61	1	S	IELLQHSLPKINRSASEPSLHRAAHTEDINA;IELLQRSLPKIERSASEPSLHRTQADELPAC	X;X;X;X;X;X;X;X;X;X;X;X;X;X;X;Phospho (STY);X;X;X;X;X;X;X;X;X;X;X;X;X;X;X	XXXXXXXXXXXXXPPPPPPPPPXXXXXXXXX	SAS(1)EPSLHR	S(-40.16)AS(40.16)EPS(-59.03)LHR	3	2	-0.14348	49559000	21857000	53562000	28209000	29542000	22397000	47916000	19669000	34816000	37746000	33477000	32636000	42583000	52311000	39628000	34449000	33946000	23173000	580;621	621	2388	2621	34165;34166;34167;34168;34169;34170;34171;34172;34173;34174;34175;34176;34177;34178;34179;34180;34181;34182	33829;33830;33831;33832;33833;33834;33835;33836;33837;33838;33839;33840;33841;33842;33843;33844;33845;33846;33847;33848;33849;33850;33851;33852;33853;33854;33855;33856;33857;33858;33859;33860;33861;33862;33863;33864;33865;33866;33867;33868;33869;33870;33871;33872;33873;33874;33875;33876;33877;33878;33879;33880;33881;33882;33883;33884;33885;33886;33887;33888;33889;33890;33891;33892;33893;33894;338…	34169	33844	Service_Sonenberg_150119_5
P04627	267	P04627	P04627	Serine/threonine-protein kinase A-Raf	Araf		0.992833	21.4699	0.00109402	48.568	41.289	48.568	1	S	PRGSPSPASVSSGRKSPHSKLPSEQRERKSL	X;X;X;X;X;X;X;X;X;X;X;X;X;X;X;Phospho (STY);X;X;X;X;X;X;X;X;X;X;X;X;X;X;X	XXXXXXXXXXXXXXXPPPPPPPPPPPXXXXX	S(0.993)PHS(0.007)KLPSEQR	S(21.47)PHS(-21.47)KLPS(-40.44)EQR	1	2	0.25695	0	1344100	2905600	2635100	0	0	0	1372500	1833600	1129000	1756500	1597300	1875400	0	2120700	1409600	4127300	1475200	267	267	2712	2985	38997;38998;38999;39000;39001;39002;39003;39004;39005;39006;39007;39008;39009;39010;39011;39012;39013;39014;39015;39016;39017	39264;39265;39266;39267	38999	39267	Service_Sonenberg_150119_17
P04918	94	P04918	P04918	Serum amyloid A-3 protein	Saa3		0.997866	26.6995	1.1684e-05	50.426	45.569	50.426	1	S	AREAVQKFTGHGAEDSRADQFANEWGRSGKD	X;X;X;X;X;X;X;X;X;X;X;X;X;X;X;Phospho (STY);X;X;X;X;X;X;X;X;X;X;X;X;X;X;X	XXXXXXXPPPPPPPPPPPPPPPPPPPPXXXX	FT(0.002)GHGAEDS(0.998)RADQFANEWGR	FT(-26.7)GHGAEDS(26.7)RADQFANEWGR	9	3	-0.084494	0	14908000	0	2259900	0	1427900	0	5097100	0	12989000	3499200	7979500	27719000	7403400	0	0	0	11706000	94	94	832	906	11638;11639;11640;11641;11642;11643;11644;11645;11646;11647	12258;12259	11638	12258	Service_Sonenberg_150119_2
P05064	36	P05064	P05064	Fructose-bisphosphate aldolase A	Aldoa		0.802648	6.36006	1.48476e-07	79.393	60.069	47.204	1	S	HRIVAPGKGILAADESTGSIAKRLQSIGTEN	X;X;X;X;X;X;X;X;X;X;X;X;X;X;X;Phospho (STY);X;X;X;X;X;X;X;X;X;Phospho (STY);X;X;X;X;X	XXXXXXXXPPPPPPPPPPPPPPPXXXXXXXX	GILAADES(0.803)T(0.186)GS(0.012)IAKR	GILAADES(6.36)T(-6.36)GS(-18.33)IAKR	8	3	-0.18344	797980	368880	465090	342740	396640	365570	592860	0	495690	676450	177180	212100	428520	0	356110	278040	519980	518130	36	36	914;915	990;991	12748;12751;12753;12755;12758;12760;12761;12762;12763;12764;12765;12766;12767;12768;12769;12770	13369;13373;13374;13378;13380;13383;13385;13386	12758	13383	Service_Sonenberg_150119_15
P05064	39	P05064	P05064	Fructose-bisphosphate aldolase A	Aldoa		0.92183	10.7958	1.95282e-06	58.712	45.916	58.712	1	S	VAPGKGILAADESTGSIAKRLQSIGTENTEE	X;X;X;X;X;X;X;X;X;X;X;X;X;X;X;Phospho (STY);X;X;X;X;X;X;Phospho (STY);X;X;X;X;X;X;X;X	XXXXXPPPPPPPPPPPPPPPXXXXXXXXXXX	GILAADES(0.001)T(0.077)GS(0.922)IAKR	GILAADES(-28.12)T(-10.8)GS(10.8)IAKR	11	3	0.066379	830380	366940	0	461760	371800	406830	710940	383950	524150	0	288620	312870	414430	0	396640	268680	477170	310050	39	39	914;915	990;991	12731;12732;12733;12734;12735;12736;12737;12738;12739;12740;12741;12742;12743;12744;12745;12746;12747;12749;12750;12752;12754;12756;12757;12759	13365;13366;13367;13368;13370;13371;13372;13375;13376;13377;13379;13381;13382;13384	12757	13382	Service_Sonenberg_150119_15
P05064	46	P05064	P05064	Fructose-bisphosphate aldolase A	Aldoa		0.999986	48.7368	2.0963e-17	120.92	94.511	97.203	1	S	LAADESTGSIAKRLQSIGTENTEENRRFYRQ	X;X;X;X;X;Phospho (STY);X;X;Phospho (STY);X;X;X;X;X;X;Phospho (STY);X;X;X;X;X;X;X;X;X;X;X;X;X;X;X	XXXXXXXXXXXXPPPPPPPPPPPPPPPXXXX	LQS(1)IGTENTEENR	LQS(48.74)IGT(-48.74)ENT(-66.21)EENR	3	2	-0.2262	10841000	0	8006000	0	6944200	0	10886000	4209900	10238000	13183000	8848100	8367500	10822000	0	8330900	10767000	0	7032900	46	46	1638;1639;2166	1779;1780;2384	23273;23274;23275;23276;23277;23278;23279;23280;23281;23282;23283;23284;23285;23286;23287;23288;23289;23290;23291;23292;23293;23294;23295;23296;23297;23298;23299;23300;23301;23302;23303;23304;30863;30864;30865;30866;30867;30868	23494;23495;23496;23497;23498;23499;23500;23501;23502;23503;23504;23505;23506;23507;23508;23509;23510;23511;23512;23513;23514;23515;23516;23517;23518;23519;23520;23521;30351;30352	23274	23495	Service_Sonenberg_150119_10
P05132	339	P05132	P05132	cAMP-dependent protein kinase catalytic subunit alpha	Prkaca		0.999603	38.3931	1.85148e-07	44.969	37.704	44.969	1	S	DTSNFDDYEEEEIRVSINEKCGKEFTEF___	X;X;X;X;X;X;X;X;X;X;X;X;X;X;X;Phospho (STY);X;X;X;X;X;X;X;X;X;X;X;X;X;X;X	PPPPPPPPPPPPPPPPPPPPXXXXXXXXXXX	FKGPGDTSNFDDYEEEEIRVS(1)INEK	FKGPGDT(-38.39)S(-38.39)NFDDY(-39.68)EEEEIRVS(38.39)INEK	21	3	0.39465	2693400	0	0	0	0	0	0	0	0	0	0	0	0	0	0	0	0	0	339	339	807	879	11344	12086	11344	12086	Service_Sonenberg_150119_1
P05627;P15066	73;100	P05627	P05627	Transcription factor AP-1;Transcription factor jun-D	Jun;Jund		1	92.8379	0.00575982	92.838	56.281	92.838	1	S	SDLLTSPDVGLLKLASPELERLIIQSSNGHI	X;X;X;X;X;X;X;X;X;X;X;X;X;X;X;Phospho (STY);X;X;X;X;X;X;X;X;X;X;X;X;X;X;X	XXXXXXXXXXXXXPPPPPPPPXXXXXXXXXX	LAS(1)PELER	LAS(92.84)PELER	3	2	-0.095373	3914800	2005100	2655100	8315100	9021800	9629500	6833100	2672600	5857800	22514000	8684800	10399000	0	0	0	13497000	18680000	14774000	73	73	1530	1664	21876;21877;21878;21879;21880;21881;21882;21883;21884;21885;21886;21887;21888;21889;21890	22296;22297;22298;22299;22300;22301;22302;22303;22304;22305;22306;22307;22308;22309;22310	21885	22310	Service_Sonenberg_150119_18
P06339	167	P06339	P06339	H-2 class I histocompatibility antigen, D-37 alpha chain	H2-T23		1	51.4663	0.000101295	51.466	29.81	51.466	1	S	SWTANDIASQISKHKSEAVDEAHQQRAYLQG	X;X;X;X;X;X;X;X;X;X;X;X;X;X;X;Phospho (STY);X;X;X;X;X;X;X;X;X;X;X;X;X;X;X	XXXXXXXXXXXXXPPPPPPPPPPPPPXXXXX	HKS(1)EAVDEAHQQR	HKS(51.47)EAVDEAHQQR	3	3	1.1738	0	625830	0	0	0	0	0	0	0	0	0	0	0	1152700	816550	0	0	0	167	167	1103	1192	15180;15181;15182	15646	15180	15646	Service_Sonenberg_150119_2
P06800	962	P06800	P06800	Receptor-type tyrosine-protein phosphatase C	Ptprc		0.99981	37.2019	0.00010953	50.827	41.777	44.734	1	S	QHIGNQEENKKKNRNSNVVPYDFNRVPLKHE	X;X;X;X;X;X;X;X;X;X;X;X;Deamidation (NQ);X;Deamidation (NQ);Phospho (STY);X;X;X;X;X;X;X;X;X;X;X;X;X;X;X	XXXXXXXXXXXXPPPPPPPPPPPPPXXXXXX	NRNS(1)NVVPYDFNR	NRNS(37.2)NVVPY(-37.2)DFNR	4	3	-0.12733	1063500	806780	315820	328010	424890	420000	0	0	0	0	0	224150	458380	0	295490	837940	282330	0	962	962	1855	2039;2040	26496;26497;26498;26499;26500;26501;26502;26503;26504;26505;26506;26507;26508	26323;26324;26325;26326;26327	26507	26326	Service_Sonenberg_150119_6
P08103	34	P08103	P08103	Tyrosine-protein kinase HCK	Hck		0.999989	49.8165	3.1795e-57	147.12	122.4	115.24	1	S	APRMGCVKSRFLRDGSKASKTEPSANQKGPV	X;X;X;X;X;X;X;X;X;X;X;X;X;X;X;Phospho (STY);X;X;X;X;X;X;X;X;X;X;X;X;X;X;X	XXXXXXXXXXXXXPPPPPPPPPPPPPPPXXX	DGS(1)KASKTEPSANQK	DGS(49.82)KAS(-49.82)KT(-63.23)EPS(-80.05)ANQK	3	2	-0.023658	772510	294530	6137200	860050	0	460850	2750600	470120	2341200	1879000	917040	733430	2412800	2363000	1196900	401370	521430	466970	34	34	419	463	6129;6130;6131;6132;6133;6134;6135;6136;6137;6138;6139;6140;6141;6142;6143;6144;6145;6146;6147;6148;6149;6150	7335;7336;7337;7338;7339;7340;7341;7342;7343;7344;7345;7346;7347;7348	6136	7342	Service_Sonenberg_150119_10
P08226	139	P08226	P08226	Apolipoprotein E	Apoe		0.827039	6.79812	3.37305e-14	105.89	87.532	61.167	1	S	RLGQYRNEVHTMLGQSTEEIRARLSTHLRKM	X;X;X;X;X;X;Deamidation (NQ);X;X;X;X;Oxidation (M);X;X;X;Phospho (STY);X;X;X;X;X;X;X;X;X;X;X;X;X;X;X	XPPPPPPPPPPPPPPPPPPPPXXXXXXXXXX	NEVHTMLGQS(0.827)T(0.173)EEIR	NEVHT(-39.5)MLGQS(6.8)T(-6.8)EEIR	10	3	0.23848	10095000	8085800	0	0	3554500	4770900	8071800	7900500	5243900	5293500	3401300	5562200	5937800	976360	6993700	2171800	8646700	0	139	139	1580;1777	1718;1941;1942;1944	22573;22574;25045;25046;25047;25048;25049;25050;25051;25052;25053;25054;25055;25056;25057;25058;25059;25060;25062;25065;25066;25067;25068;25069;25070;25071;25072;25073;25074;25075;25095;25096;25097;25098;25099;25100;25101;25102;25103;25104;25105;25106;25107;25108	22951;24783;24784;24785;24786;24787;24788;24789;24790;24791;24792;24793;24794;24795;24796;24797;24798;24799;24800;24801;24802;24803;24804;24805;24806;24807;24808;24809;24810;24811;24812;24813;24814;24815;24818;24819;24820;24821;24826;24827;24828;24829;24830;24831;24832;24833;24834;24835;24836;24837;24838;24839;24840;24841;24842;24843;24844;24845;24852	25069	24836	Service_Sonenberg_150119_10
P08775	1910	P08775	P08775	DNA-directed RNA polymerase II subunit RPB1	Polr2a		0.258211	0	0.000255419	48.741	30.638	48.741		S	YSPTSPVYTPTSPKYSPTSPTYSPTSPKYSP	X;X;X;X;X;X;X;X;X;X;X;X;X;X;X;Phospho (STY);X;X;X;X;X;X;X;X;X;X;X;X;X;X;X	XXXXXXXXXXXXXXPPPPPPPPPPPPPPXXX	Y(0.218)S(0.258)PT(0.258)S(0.258)PT(0.006)Y(0.001)SPTSPK	Y(-0.74)S(0)PT(0)S(0)PT(-16.01)Y(-25.82)S(-30.33)PT(-36.6)S(-42.01)PK	2	2	0.27294	0	0	0	0	0	0	0	0	0	0	0	0	0	0	0	0	0	0	1910	1910	3478	3821			50029	50068	Service_Sonenberg_150119_17
P08775	1913	P08775	P08775	DNA-directed RNA polymerase II subunit RPB1	Polr2a		0.96747	17.1673	5.38999e-06	85.42	52.216	72.891	1	S	TSPVYTPTSPKYSPTSPTYSPTSPKYSPTSP	X;X;X;X;X;X;X;X;X;X;X;X;X;X;X;Phospho (STY);X;X;X;X;X;X;X;X;X;X;X;X;X;X;X	XXXXXXXXXXXPPPPPPPPPPPPPPXXXXXX	Y(0.002)S(0.002)PT(0.008)S(0.967)PT(0.019)YS(0.001)PTSPK	Y(-27.01)S(-26.19)PT(-20.63)S(17.17)PT(-17.17)Y(-47.42)S(-29.86)PT(-35.95)S(-41.82)PK	5	2	-0.31447	0	456020	0	0	0	889280	1707800	0	0	0	0	0	0	1182500	0	0	0	1225700	1913	1913	3478	3821	50025;50026;50030;50031;50032	50062;50063;50064;50065;50069;50070	50030	50070	Service_Sonenberg_150119_18
P08775	1875	P08775	P08775	DNA-directed RNA polymerase II subunit RPB1	Polr2a		0.267665	0	0.000255419	48.741	39.552	48.741		S	YSPTSPKYSPTSPKYSPTSPTYSPTTPKYSP	X;X;X;X;X;X;X;X;X;X;X;X;X;X;X;Phospho (STY);X;X;X;X;X;X;X;X;X;X;X;X;X;X;X	XXXXXXXXXXXXXXPPPPPPPPPPPPPPXXX	Y(0.226)S(0.268)PT(0.268)S(0.232)PT(0.006)Y(0.001)SPTTPK	Y(-0.74)S(0)PT(0)S(-0.63)PT(-16.47)Y(-24.99)S(-30.28)PT(-35.62)T(-40.36)PK	2	2	0.35274	0	0	0	0	0	0	0	0	0	0	0	0	0	0	0	0	0	0	1875	1875	3479	3822			50034	50073	Service_Sonenberg_150119_18
P08775	1878	P08775	P08775	DNA-directed RNA polymerase II subunit RPB1	Polr2a		0.643983	7.09988	5.18719e-05	55.841	44.308	55.841	1	S	TSPKYSPTSPKYSPTSPTYSPTTPKYSPTSP	X;X;X;X;X;X;X;X;X;X;X;X;X;X;X;Phospho (STY);X;X;X;X;X;X;X;X;X;X;X;X;X;X;X	XXXXXXXXXXXPPPPPPPPPPPPPPXXXXXX	Y(0.106)S(0.126)PT(0.106)S(0.644)PT(0.017)YS(0.001)PTTPK	Y(-7.84)S(-7.1)PT(-7.84)S(7.1)PT(-15.82)Y(-33.37)S(-27.87)PT(-36.77)T(-36.26)PK	5	2	0.37243	844830	0	0	0	0	0	0	0	1250900	1625300	0	0	392960	0	485500	0	0	0	1878	1878	3479	3822	50033;50035;50036;50037;50038	50071;50072	50033	50072	Service_Sonenberg_150119_10
P09411	203	P09411	P09411	Phosphoglycerate kinase 1	Pgk1		1	51.4872	2.30402e-05	51.487	46.729	51.487	1	S	FLMKKELNYFAKALESPERPFLAILGGAKVA	X;X;X;X;X;X;X;X;X;X;X;X;X;X;X;Phospho (STY);X;X;X;X;X;X;X;X;X;X;X;X;X;X;X	XXXXXXXXXXXXPPPPPPPPPPPPPPPPPXX	ALES(1)PERPFLAILGGAK	ALES(51.49)PERPFLAILGGAK	4	3	-0.32595	0	0	0	0	0	0	0	0	873990	0	0	0	0	0	0	0	0	0	203	203	164	175	2395	2401;2402	2395	2402	Service_Sonenberg_150119_9
P09450	256	P09450	P09450	Transcription factor jun-B	Junb		0.931845	10.5005	0.000235281	41.446	34.571	41.446	2	S	QTVPEARSRDATPPVSPINMEDQERIKVERK	X;X;X;X;X;X;X;X;X;X;X;Phospho (STY);X;X;X;Phospho (STY);X;X;X;X;X;X;X;X;X;X;X;X;X;X;X	XXXXXXXPPPPPPPPPPPPPPPPPPXXXXXX	S(0.235)RDAT(0.833)PPVS(0.932)PINMEDQER	S(-6.61)RDAT(6.61)PPVS(10.5)PINMEDQER	9	3	0.90223	924540	1260800	0	0	0	0	1130100	685340	872670	2195800	0	1177400	548820	448960	1056800	2169000	0	0	256	256	2779	3059	39962;39963;39964;39965;39966;39967;39968;39969;39970;39971;39972	40261	39962	40261	Service_Sonenberg_150119_16
P09528	5	P09528	P09528	Ferritin heavy chain;Ferritin heavy chain, N-terminally processed	Fth1		0.936285	13.2877	0.00137497	61.593	40.293	48.998	1	S	___________MTTASPSQVRQNYHQDAEAA	X;X;X;X;X;X;X;X;X;X;X;X;X;X;X;Phospho (STY);X;X;X;X;X;X;X;X;X;X;X;X;X;X;X	XXXXXXXXXXXXPPPPPPPPPXXXXXXXXXX	T(0.004)T(0.016)AS(0.936)PS(0.044)QVR	T(-23.76)T(-17.71)AS(13.29)PS(-13.29)QVR	4	2	0.027404	0	1393300	2415000	1481200	1969900	1581700	0	0	0	3429400	2142200	2027700	3431600	0	0	1697900	1982700	0	5	5	3216	3536	46564;46565;46566;46569;46570;46571;46572;46573;46574;46575;46576	47266;47267;47268;47269	46564	47266	Service_Sonenberg_150119_3
P10711	100	P10711	P10711	Transcription elongation factor A protein 1	Tcea1		0.999926	41.3874	2.30801e-162	183.31	157.18	100.48	1	S	DPEEKKKEPAISSQNSPEAREESSSSSNVSS	X;X;X;X;X;X;X;X;X;X;X;X;X;X;Deamidation (NQ);Phospho (STY);X;X;X;X;X;X;X;X;X;X;X;X;X;X;X	XXXXXPPPPPPPPPPPPPPPXXXXXXXXXXX	KKEPAISSQNS(1)PEAR	KKEPAIS(-59.29)S(-41.39)QNS(41.39)PEAR	11	3	0.32311	10745000	6288700	12802000	8139000	4983100	4126400	13660000	3141200	6078500	9173700	10110000	5408900	8193700	11255000	7407500	3069300	8462000	4409600	100	100	704;1320;1366	765;1431;1483;1484	9785;9786;9787;9788;9789;18448;18449;18450;18451;18452;18453;18454;18455;18456;18457;18458;18459;18460;18461;18462;18463;18464;18465;18466;18467;18468;18469;18470;18471;18472;18473;18474;19431;19432;19433;19434;19435;19436;19437;19438;19439;19440;19441;19442;19443;19444;19445;19446;19447;19448;19449;19450;19451;19452;19453;19454;19455;19456;19457;19458;19459;19460;19461;19462;19463;19464;19465;19…	10395;10396;10397;10398;10399;10400;18687;18688;18689;18690;18691;18692;18693;18694;18695;18696;18697;18698;18699;18700;18701;18702;18703;18704;18705;18706;18707;18708;18709;18710;18711;18712;18713;19780;19781;19782;19783;19784;19785;19786;19787;19788;19789;19790;19791;19792;19793;19794;19795;19796;19797;19798;19799;19800;19801;19802;19803;19804;19805;19806;19807;19808;19809;19810;19811;19812;198…	19460	19902	Service_Sonenberg_150119_14
P10923	288	P10923	P10923	Osteopontin	Spp1		0.862772	8.18656	0.000138026	67.385	49.073	67.385	1	S	EDDRYLKFRISHELESSSSEVN_________	X;X;X;X;X;X;X;X;X;X;X;X;X;X;X;Phospho (STY);X;X;X;X;X;X;X;X;X;X;X;X;X;X;X	XXXXXXXXXPPPPPPPPPPPPPXXXXXXXXX	IS(0.003)HELES(0.863)S(0.131)S(0.003)SEVN	IS(-24.54)HELES(8.19)S(-8.19)S(-24.54)S(-36.95)EVN	7	2	0.60089	992670	0	1395200	637430	421280	0	855230	0	715080	527640	0	496620	797940	870540	0	0	0	0	288	288	1253	1360	17512;17515;17531;17533;17534;17535;17536;17537;17538;17539	17837;17843	17515	17843	Service_Sonenberg_150119_3
P10923	289	P10923	P10923	Osteopontin	Spp1		0.741401	9.05328	1.40438e-13	70.488	62.839	70.488	1	S	DDRYLKFRISHELESSSSEVN__________	X;X;X;X;X;X;X;X;X;X;X;X;X;X;X;Phospho (STY);X;X;X;X;X;X;X;X;X;X;X;X;X;X;X	XXXXXXXXPPPPPPPPPPPPPXXXXXXXXXX	ISHELES(0.074)S(0.741)S(0.092)S(0.092)EVN	IS(-42.52)HELES(-10)S(9.05)S(-9.05)S(-9.05)EVN	8	2	-0.25816	16516000	0	0	10032000	5364200	4815600	0	0	0	0	0	0	0	0	0	0	0	0	289	289	1253	1360	17511;17516;17517;17532	17833;17834;17835;17836;17844;17845;17846;17847	17517	17847	Service_Sonenberg_150119_6
P10923	290	P10923	P10923	Osteopontin	Spp1		0.494697	0	1.40438e-13	70.488	58.696	66.299		S	DRYLKFRISHELESSSSEVN___________	X;X;X;X;X;X;X;X;X;X;X;X;X;X;X;Phospho (STY);X;X;X;X;X;X;X;X;X;X;X;X;X;X;X	XXXXXXXPPPPPPPPPPPPPXXXXXXXXXXX	ISHELESS(0.01)S(0.495)S(0.495)EVN	IS(-52.12)HELES(-30.34)S(-16.88)S(0)S(0)EVN	9	2	0.31109	0	0	0	0	0	0	0	0	0	0	0	0	0	0	0	0	0	0	290	290	1253	1360			17529	17864	Service_Sonenberg_150119_17
P10923	291	P10923	P10923	Osteopontin	Spp1		0.494697	0	1.40438e-13	70.488	58.696	66.299		S	RYLKFRISHELESSSSEVN____________	X;X;X;X;X;X;X;X;X;X;X;X;X;X;X;X;X;X;X;X;X;X;X;X;X;X;X;X;X;X;X	XXXXXXXXXXXXXXXXXXXXXXXXXXXXXXX	ISHELESS(0.01)S(0.495)S(0.495)EVN	IS(-52.12)HELES(-30.34)S(-16.88)S(0)S(0)EVN	10	2	0.31109	0	0	0	0	0	0	0	0	0	0	0	0	0	0	0	0	0	0	291	291	1253	1360			17529	17864	Service_Sonenberg_150119_17
P10923	271	P10923	P10923	Osteopontin	Spp1		1	62.6939	2.63366e-05	81.565	59.692	62.694	1	S	HKFHSHKDKLVLDPKSKEDDRYLKFRISHEL	X;X;X;X;X;X;X;X;X;X;X;X;X;X;X;Phospho (STY);X;X;X;X;X;X;X;X;X;X;X;X;X;X;X	XXXXXXXXXPPPPPPPPPPPPPPPXXXXXXX	LVLDPKS(1)KEDDR	LVLDPKS(62.69)KEDDR	7	2	0.37339	1591400	337310	1439300	527760	617790	490900	2717200	546850	0	0	1025300	1263600	967970	1796600	930820	0	1170300	851150	271	271	1686;2604	1831;2867	23838;23839;23840;23841;23842;23843;23844;23845;23846;23847;23848;23849;23850;23851;23852;37412;37413;37414;37415;37416;37417;37418;37419	23978;23979;23980;23981;23982;23983;23984;23985;23986;37583;37584;37585;37586;37587	23844	23986	Service_Sonenberg_150119_14
P11276	2475	P11276	P11276	Fibronectin;Anastellin	Fn1		0.999949	44.734	1.25624e-11	50.908	39.932	50.908	1	S	IECFMPLDVQADRDDSRE_____________	X;X;X;X;X;X;X;X;X;X;X;X;X;X;X;Phospho (STY);X;X;X;X;X;X;X;X;X;X;X;X;X;X;X	PPPPPPPPPPPPPPPPPPXXXXXXXXXXXXX	TNTNVNCPIECFMPLDVQADRDDS(1)RE	T(-47.51)NT(-44.73)NVNCPIECFMPLDVQADRDDS(44.73)RE	24	3	1.2546	0	2963700	0	0	0	0	0	0	0	0	0	0	0	0	0	0	0	0	2475	2475	3141	3457	45388	46155	45388	46155	Service_Sonenberg_150119_2
P11499	255	P11499	P11499	Heat shock protein HSP 90-beta	Hsp90ab1		0.999999	62.5274	4.95607e-155	174.21	147.68	172.57	1	S	EDKEDEEKPKIEDVGSDEEDDSGKDKKKKTK	X;X;X;X;X;X;X;X;X;X;X;X;X;X;X;Phospho (STY);X;X;X;X;X;X;X;X;X;X;X;X;X;X;X	XXXXXXXXXXPPPPPPPPPPPPPPPPPXXXX	IEDVGS(1)DEEDDSGKDKK	IEDVGS(62.53)DEEDDS(-62.53)GKDKK	6	2	-0.2276	17286000	2296200	9237000	10931000	7739400	6774700	19602000	4554600	10579000	15462000	13562000	9210900	15943000	20819000	18768000	8829400	13619000	6531900	255	255	1190;1191;1192	1295;1296;1297	16632;16633;16634;16635;16636;16637;16638;16639;16640;16641;16642;16643;16644;16645;16646;16647;16648;16649;16650;16651;16652;16653;16654;16655;16656;16657;16658;16659;16660;16661;16662;16663;16664;16665;16666;16667;16668;16669;16670;16671;16672;16673;16674;16675;16676;16677;16678;16679;16680;16681;16682;16683;16684;16685;16686;16687;16688;16689;16690;16691;16692;16693;16694;16695;16696;16697;166…	16990;16991;16992;16993;16994;16995;16996;16997;16998;16999;17000;17001;17002;17003;17004;17005;17006;17007;17008;17009;17010;17011;17012;17013;17014;17015;17016;17017;17018;17019;17020;17021;17022;17023;17024;17025;17026;17027;17028;17029;17030;17031;17032;17033;17034;17035;17036;17037;17038;17039;17040;17041;17042;17043;17044;17045;17046;17047;17048;17049;17050;17051;17052;17053;17054;17055;170…	16693	17120	Service_Sonenberg_150119_10
P11835	454	P11835	P11835	Integrin beta-2	Itgb2		0.978388	16.5582	1.44168e-05	100.73	70.551	100.73	1	S	TVQVRPQCECQCRDQSREQSLCGGKGVMECG	X;X;X;X;X;X;X;X;X;X;X;X;X;X;X;Phospho (STY);X;X;X;X;X;X;X;X;X;X;X;X;X;X;X	XXXXXXXXXXXXXPPPPPPPPPPPPXXXXXX	DQS(0.978)REQS(0.022)LCGGK	DQS(16.56)REQS(-16.56)LCGGK	3	2	-0.24399	1578000	496090	2280300	1758300	1626800	0	2320500	349720	1102100	1726600	1545900	1124900	2335500	2181700	1116600	1113900	1236000	703050	454	454	489	536	6881;6882;6883;6884;6885;6886;6887;6888;6889;6890;6891;6892;6893;6894;6895;6896;6897	7826;7827	6882	7827	Service_Sonenberg_150119_7
P12382	775	P12382	P12382	ATP-dependent 6-phosphofructokinase, liver type	Pfkl		0.998747	29.0161	0.0230706	71.451	54.78	49.715	1	S	DYVSGELEHVTRRTLSIDKGF__________	X;X;X;X;X;X;X;X;X;X;X;X;X;X;X;Phospho (STY);X;X;X;X;X;X;X;X;X;X;X;X;X;X;X	XXXXXXXXXXXXPPPPPPPPPXXXXXXXXXX	T(0.001)LS(0.999)IDKGF	T(-29.02)LS(29.02)IDKGF	3	2	-1.7771	1449500	2446700	1423000	2680500	3552900	4032900	447530	1042400	795420	483890	1633100	2291000	719740	511570	128260	2906400	2943900	3403700	775	775	2329;3120	2558;3432	33323;33324;33325;33326;33327;33328;33329;33330;33331;33332;33333;33334;33335;33336;45013;45014;45015;45016;45017;45018;45019;45020;45021;45022;45023;45024;45025;45026;45027;45028;45029;45030	32848;32849;32850;32851;32852;32853;32854;45761;45762;45763	45014	45762	Service_Sonenberg_150119_4
P13864	122	P13864	P13864	DNA (cytosine-5)-methyltransferase 1	Dnmt1		0.875209	8.45927	0.00192094	71.153	45.915	71.153	1	S	PANGSRPTWRAEMADSNRSPRSRPKPRGPRR	X;X;X;X;X;X;X;X;X;X;X;X;X;X;X;Phospho (STY);X;X;X;X;X;X;X;X;X;X;X;X;X;X;X	XXXXXXXXXXPPPPPPPPPPPXXXXXXXXXX	AEMADS(0.875)NRS(0.125)PR	AEMADS(8.46)NRS(-8.46)PR	6	2	-1.6472	1214200	0	0	1727000	0	0	0	0	1430100	1867200	0	0	0	0	0	0	0	0	122	122	65	70	881;882;885;886	901;902;903;906;907	885	906	Service_Sonenberg_150119_9
P13864	125	P13864	P13864	DNA (cytosine-5)-methyltransferase 1	Dnmt1		0.90345	9.71154	0.00155452	80.871	52.492	80.871	1	S	GSRPTWRAEMADSNRSPRSRPKPRGPRRSKS	X;X;X;X;X;X;X;X;X;X;X;X;X;X;X;Phospho (STY);X;X;X;X;X;X;X;X;X;X;X;X;X;X;X	XXXXXXXPPPPPPPPPPPXXXXXXXXXXXXX	AEMADS(0.097)NRS(0.903)PR	AEMADS(-9.71)NRS(9.71)PR	9	2	-1.1721	0	0	0	0	772260	334710	0	404970	0	1867200	1185800	516950	486890	1278900	610580	851260	989640	514150	125	125	65	70	883;884;886;887;888;889;890;891;892;893;894;895	904;905;907;908;909	884	905	Service_Sonenberg_150119_8
P14152	241	P14152	P14152	Malate dehydrogenase, cytoplasmic	Mdh1		0.930996	12.2751	0.000478935	86.911	51.642	41.567	1	S	TVQQRGAAVIKARKLSSAMSAAKAIADHIRD	X;X;X;X;X;X;X;X;X;X;X;X;X;X;X;Phospho (STY);X;X;Oxidation (M);X;X;X;X;X;X;X;X;X;X;X;X	XXXXXXXXXXXXXPPPPPPPPPPXXXXXXXX	KLS(0.931)S(0.055)AMS(0.014)AAK	KLS(12.28)S(-12.28)AMS(-18.27)AAK	3	2	-0.087373	1230900	1042100	0	0	0	1092700	0	865330	0	0	0	0	0	1014200	0	355460	1287100	0	241	241	1395	1513;1514	19866;19867;19868;19869;19870;19871;19872;19873;19874;19875;19876	20304;20305;20306;20307;20308;20309	19868	20306	Service_Sonenberg_150119_17
P14234	13	P14234	P14234	Tyrosine-protein kinase Fgr	Fgr		1	49.5594	6.22313e-05	49.559	39.638	49.559	1	S	___MGCVFCKKLEPASKEDVGLEGDFRSQTA	X;X;X;X;X;X;X;X;X;X;X;X;X;X;X;Phospho (STY);X;X;X;X;X;X;X;X;X;X;X;X;X;X;X	XXXXXXXXXXPPPPPPPPPPPPPPPPPXXXX	KLEPAS(1)KEDVGLEGDFR	KLEPAS(49.56)KEDVGLEGDFR	6	3	0.059003	0	18389000	18173000	0	0	0	0	18970000	0	0	0	0	0	0	0	0	0	13857000	13	13	1378	1496	19635;19636;19637;19638	20054;20055;20056;20057;20058	19638	20058	Service_Sonenberg_150119_18
P14602	86	P14602	P14602	Heat shock protein beta-1	Hspb1		0.867203	8.15211	0.0013045	79.659	44.967	65.5	1	S	TLAAPAFSRALNRQLSSGVSEIRQTADRWRV	X;X;X;X;X;X;X;X;X;X;X;X;X;X;X;Phospho (STY);X;X;X;X;X;X;X;X;X;X;X;X;X;X;X	XXXXXXXXXXXXXPPPPPPPPPPXXXXXXXX	QLS(0.867)S(0.133)GVSEIR	QLS(8.15)S(-8.15)GVS(-40.06)EIR	3	2	-0.66882	1288900	420510	0	1940900	2122300	2017300	598480	286140	307270	1838900	0	0	488270	0	312230	2120100	2581900	1851100	86	86	1977	2175	28179;28180;28181;28182;28183;28184;28185;28186;28187;28188;28189;28190;28191;28192	27673;27674;27675;27676;27677;27678;27679;27680;27681;27682;27683;27684;27685;27686;27687;27688;27689;27690;27691;27692;27693;27694	28186	27689	Service_Sonenberg_150119_16
P14901	242	P14901	P14901	Heme oxygenase 1	Hmox1		0.998046	27.0869	1.26054e-08	61.181	52.384	61.181	1	S	DQSPSQMASLRQRPASLVQDTAPAETPRGKP	X;X;X;X;X;X;X;X;X;X;X;X;X;X;X;Phospho (STY);X;X;X;X;X;X;X;X;X;X;X;X;X;X;X	XXXXXXXXXXXPPPPPPPPPPPPPPPPPXXX	QRPAS(0.998)LVQDT(0.002)APAETPR	QRPAS(27.09)LVQDT(-27.09)APAET(-57.2)PR	5	3	-0.75132	1943400	2852800	1340300	0	2687200	0	1771200	2597900	1563800	1981900	0	0	775790	0	1610000	1385700	0	1968400	242	242	2005	2207	28518;28519;28520;28521;28522;28523;28524;28525;28526;28527;28528;28529	27993;27994;27995;27996;27997;27998;27999;28000;28001;28002;28003;28004;28005;28006;28007;28008;28009;28010	28525	28006	Service_Sonenberg_150119_10
P15379	733	P15379	P15379	CD44 antigen	Cd44		1	85.591	3.11697e-05	99.834	65.333	99.834	1	S	LVINGGNGTVEDRKPSELNGEASKSQEMVHL	X;X;X;X;X;X;X;X;X;X;X;X;X;X;X;Phospho (STY);X;X;Deamidation (NQ);X;X;X;X;X;X;X;X;X;X;X;X	XXXXXXXXXXXXXPPPPPPPPPPPXXXXXXX	KPS(1)ELNGEASK	KPS(85.59)ELNGEAS(-85.59)K	3	2	0.21976	0	0	706680	953390	530780	797100	0	254570	0	0	0	0	783060	418790	0	0	1109100	849130	733	733	1420	1541;1542	20200;20201;20202;20203;20204;20205;20206;20207;20208;20209;20210;20211;20212;20213;20214	20705;20706;20707;20708;20709;20710;20711;20712;20713	20203	20710	Service_Sonenberg_150119_17
P15379	771	P15379	P15379	CD44 antigen	Cd44		1	48.4235	0.0121206	48.423	8.8767	48.423	1	S	TPDQCMTADETRNLQSVDMKIGV________	X;X;X;X;X;X;X;X;X;X;X;X;X;X;X;Phospho (STY);X;X;X;X;X;X;X;X;X;X;X;X;X;X;X	XXXXXXXXXXXXPPPPPPPPXXXXXXXXXXX	NLQS(1)VDMK	NLQS(48.42)VDMK	4	2	0.35827	1521700	0	0	0	0	2188400	2126300	1138900	1267700	4066000	0	0	956580	638020	745760	1765100	0	0	771	771	1825	2003	25987;25988;25989;25990;25991;25992;25993;25994;25995;25996	25898	25987	25898	Service_Sonenberg_150119_10
P15533	258	P15533	P15533	Tripartite motif-containing protein 30A	Trim30a		0.492217	0	3.95204e-05	52.185	44.271	52.185		S	STLEMLQGANCVLRRSQSLSLQQPQTVPQKR	X;X;X;X;X;X;X;X;X;X;X;X;X;X;X;Phospho (STY);X;X;X;X;X;X;X;X;X;X;X;X;X;X;X	XXXXXXXXXXXXXXXPPPPPPPPPPPPPPPP	S(0.492)QS(0.492)LS(0.016)LQQPQTVPQKR	S(0)QS(0)LS(-15.01)LQQPQT(-42.09)VPQKR	1	3	-0.75985	0	0	0	0	0	0	0	0	0	0	0	0	0	0	0	0	0	0	258	258	2764	3043			39721	39999	Service_Sonenberg_150119_16
P15533	260	P15533	P15533	Tripartite motif-containing protein 30A	Trim30a		0.57168	1.35	2.29502e-09	68.243	60.621	68.243	1	S	LEMLQGANCVLRRSQSLSLQQPQTVPQKRKR	X;X;X;X;X;X;X;X;X;X;X;X;X;X;X;Phospho (STY);X;X;X;X;X;X;X;X;X;X;X;X;X;X;X	XXXXXXXXXXXXXPPPPPPPPPPPPPPPPXX	S(0.419)QS(0.572)LS(0.009)LQQPQTVPQKR	S(-1.35)QS(1.35)LS(-17.85)LQQPQT(-55.76)VPQKR	3	3	-1.3068	0	368250	0	0	0	0	0	0	303110	1262800	550010	0	228370	0	0	0	0	1415300	260	260	2764	3043	39722;39723;39724;39725;39726;39727	40000	39722	40000	Service_Sonenberg_150119_18
P15864;P43277	36;37	P15864;P43277	P43277	Histone H1.2;Histone H1.3	Hist1h1c;Hist1h1d		0.999828	37.6407	2.19195e-05	83.633	59.922	83.633	1	S	KKAKKTGAAAGKRKASGPPVSELITKAVAAS;KKKAAKKPAGVRRKASGPPVSELITKAVAAS	X;X;X;X;X;X;X;X;X;X;X;X;X;X;X;Phospho (STY);X;X;X;X;X;X;X;X;X;X;X;X;X;X;X	XXXXXXXXXXXXXPPPPPPPPPPPPPXXXXX	KAS(1)GPPVSELITK	KAS(37.64)GPPVS(-37.64)ELIT(-74.5)K	3	2	0.33056	600840	583400	1151200	0	439820	559830	499660	432190	341330	468810	319580	583750	472940	276970	0	436940	769020	505610	36;37	37	1293	1403	18126;18127;18128;18129;18130;18131;18132;18133;18134;18135;18136;18137;18138;18139;18140;18141;18142;18143;18144;18145;18146;18147;18148;18149	18383;18384;18385	18128	18385	Service_Sonenberg_150119_17
P15864	2	P15864	P15864	Histone H1.2	Hist1h1c		1	41.0875	2.50361e-05	41.087	32.9	41.087	1	S	______________MSEAAPAAPAAAPPAEK	X;X;X;X;X;X;X;X;X;X;X;X;X;X;X;Phospho (STY);X;X;X;X;X;X;X;X;X;X;X;X;X;X;X	XXXXXXXXXXXXXXXPPPPPPPPPPPPPPPP	S(1)EAAPAAPAAAPPAEKAPAK	S(41.09)EAAPAAPAAAPPAEKAPAK	1	3	-0.046302	0	0	0	0	0	0	0	744940	0	0	0	0	0	0	0	0	0	0	2	2	2437	2680	35110	35067	35110	35067	Service_Sonenberg_150119_8
P16254	44	P16254	P16254	Signal recognition particle 14 kDa protein;Signal recognition particle 14 kDa protein, N-terminally processed	Srp14		0.600765	1.77477	0.000904505	41.399	17.795	41.399	1	S	TLKKYDGRTKPIPRKSSVEGLEPAENKCLLR	X;X;X;X;X;X;X;X;X;X;X;X;X;X;X;Phospho (STY);X;X;X;X;X;X;X;X;X;X;X;X;X;X;X	XXXXXXXXXXXXXXPPPPPPPPPPPPPXXXX	KS(0.601)S(0.399)VEGLEPAENK	KS(1.77)S(-1.77)VEGLEPAENK	2	2	0.13147	0	0	0	0	0	942010	0	0	0	0	0	0	0	0	0	0	0	0	44	44	1478	1605	21080	21569	21080	21569	Service_Sonenberg_150119_6
P16254	45	P16254	P16254	Signal recognition particle 14 kDa protein;Signal recognition particle 14 kDa protein, N-terminally processed	Srp14		0.895613	9.33473	5.32261e-05	78.486	53.19	74.133	1	S	LKKYDGRTKPIPRKSSVEGLEPAENKCLLRA	X;X;X;X;X;X;X;X;X;X;X;X;X;X;X;Phospho (STY);X;X;X;X;X;X;X;X;X;X;X;X;X;X;X	XXXXXXXXXXXXXPPPPPPPPPPPPPXXXXX	KS(0.104)S(0.896)VEGLEPAENK	KS(-9.33)S(9.33)VEGLEPAENK	3	2	0.27179	0	494770	0	0	1121800	0	918210	422480	767490	1112400	0	0	0	677450	749300	1311500	1797000	1450100	45	45	1478	1605	21079;21081;21082;21083;21084;21085;21086;21087;21088;21089;21090	21568;21570;21571;21572;21573;21574;21575;21576;21577	21083	21573	Service_Sonenberg_150119_10
P16858	208	P16858	P16858	Glyceraldehyde-3-phosphate dehydrogenase	Gapdh		0.578532	1.37562	0.000519548	42.317	31.793	42.317	1	S	LWRDGRGAAQNIIPASTGAAKAVGKVIPELN	X;X;X;X;X;X;X;X;X;X;X;X;X;X;X;Phospho (STY);X;X;X;X;X;X;X;X;X;X;X;X;X;X;X	XXXXXXPPPPPPPPPPPPPPPXXXXXXXXXX	GAAQNIIPAS(0.579)T(0.421)GAAK	GAAQNIIPAS(1.38)T(-1.38)GAAK	10	2	-0.6547	0	0	0	0	0	0	0	0	0	0	0	0	0	0	1686700	0	0	0	208	208	841	915	11745	12306	11745	12306	Service_Sonenberg_150119_15
P16872	356	P16872	P16872	Interleukin-7 receptor subunit alpha	Il7r		0.98957	20.7372	1.44183e-05	75.018	66.368	75.018	1	S	RAAVHSANRSPETSVSPPETVRRESPLRCLA	X;X;X;X;X;X;X;X;X;X;X;X;X;X;X;Phospho (STY);X;X;X;X;X;X;X;X;X;X;X;X;X;X;X	XXXXXXXXXPPPPPPPPPPPPPPXXXXXXXX	SPET(0.002)S(0.008)VS(0.99)PPETVRR	S(-56.19)PET(-27.47)S(-20.74)VS(20.74)PPET(-35.11)VRR	7	3	0.15005	832220	124100	384780	541950	694140	626700	1264500	0	0	1520700	801370	976440	838840	633440	535840	0	1343500	957240	356	356	2706	2979	38946;38947;38948;38949;38950;38951;38952;38953;38954;38955;38956;38957;38958;38959;38960	39198;39199;39200;39201;39202;39203;39204;39205	38951	39204	Service_Sonenberg_150119_17
P17095	102	P17095	P17095	High mobility group protein HMG-I/HMG-Y	Hmga1		0.470223	0	8.97695e-05	46.131	41.422	46.131		S	PKKLEKEEEEGISQESSEEEQ__________	X;X;X;X;X;X;X;X;X;X;X;X;X;X;X;Phospho (STY);X;X;X;X;X;X;X;X;X;X;X;X;X;X;X	XXPPPPPPPPPPPPPPPPPPPXXXXXXXXXX	KLEKEEEEGIS(0.06)QES(0.47)S(0.47)EEEQ	KLEKEEEEGIS(-8.97)QES(0)S(0)EEEQ	14	3	-0.36285	0	0	0	0	0	0	0	0	0	0	0	0	0	0	0	0	0	0	102	102	1376	1494			19612	20024	Service_Sonenberg_150119_7
P17095	103	P17095	P17095	High mobility group protein HMG-I/HMG-Y	Hmga1		0.470223	0	8.97695e-05	46.131	41.422	46.131		S	KKLEKEEEEGISQESSEEEQ___________	X;X;X;X;X;X;X;X;X;X;X;X;X;X;X;X;X;X;X;X;X;X;X;X;X;X;X;X;X;X;X	XXXXXXXXXXXXXXXXXXXXXXXXXXXXXXX	KLEKEEEEGIS(0.06)QES(0.47)S(0.47)EEEQ	KLEKEEEEGIS(-8.97)QES(0)S(0)EEEQ	15	3	-0.36285	0	0	0	0	0	0	0	0	0	0	0	0	0	0	0	0	0	0	103	103	1376	1494			19612	20024	Service_Sonenberg_150119_7
P18052	180	P18052	P18052	Receptor-type tyrosine-protein phosphatase alpha	Ptpra		0.944363	12.4117	0.00377464	51.286	41.964	51.286	1	S	MLRFKKYKQAGSHSNSFRLSNGRTEDVEPQS	X;X;X;X;X;X;X;X;X;X;X;X;X;X;X;Phospho (STY);X;X;X;X;X;X;X;X;X;X;X;X;X;X;X	XXXXXXXXPPPPPPPPPPXXXXXXXXXXXXX	QAGS(0.001)HS(0.054)NS(0.944)FR	QAGS(-28.17)HS(-12.41)NS(12.41)FR	8	2	0.023465	0	0	810890	0	0	0	0	0	0	0	0	0	0	0	0	0	0	0	180	180	1930	2125	27585	27278	27585	27278	Service_Sonenberg_150119_3
P18581	645	P18581	P18581	Cationic amino acid transporter 2	Slc7a2		1	43.6798	0.00224647	55.452	43.605	43.68	1	S	EKSAMQANDHHQRNLSLPFILHEKTSEC___	X;X;X;X;X;X;X;X;X;X;X;X;X;X;X;Phospho (STY);X;X;X;X;X;X;X;X;X;X;X;X;X;X;X	XXXXXXXXXXXXXPPPPPPPPPPPXXXXXXX	NLS(1)LPFILHEK	NLS(43.68)LPFILHEK	3	2	0.84039	507560	4496500	441660	0	0	593680	198340	743980	792240	0	0	818180	617640	325820	0	245510	0	0	645	645	1830	2008	26053;26054;26055;26056;26057;26058;26059;26060;26061;26062;26063	25913;25914;25915;25916;25917;25918;25919;25920;25921;25922	26058	25922	Service_Sonenberg_150119_13
P18608	7	P18608	P18608	Non-histone chromosomal protein HMG-14	Hmgn1		1	41.8601	0.000101927	84.779	61.682	41.86	1	S	_________MPKRKVSADGAAKAEPKRRSAR	X;X;X;X;X;X;X;X;X;X;X;X;X;X;X;Phospho (STY);X;X;X;X;X;X;X;X;X;X;X;X;X;X;X	XXXXXXXXXXXXXPPPPPPPPPPPPPXXXXX	KVS(1)ADGAAKAEPK	KVS(41.86)ADGAAKAEPK	3	3	0.62419	810860	0	0	10728000	7084600	6074200	1158500	426950	1232800	33798000	10951000	6135800	828080	1854100	967540	7731600	0	5593900	7	7	1502;1503	1633;1634	21496;21497;21498;21499;21500;21501;21502;21503;21504;21505;21506;21507;21508;21509;21510;21511;21512;21513;21514;21515;21516;21517;21518;21519;21520;21521;21522;21523;21524;21525;21526;21527;21528	21964;21965;21966;21967;21968;21969;21970;21971;21972;21973;21974;21975;21976;21977;21978;21979;21980;21981;21982;21983;21984;21985;21986;21987;21988;21989;21990;21991;21992;21993;21994	21519	21994	Service_Sonenberg_150119_18
P18653	721	P18653	P18653	Ribosomal protein S6 kinase alpha-1	Rps6ka1		0.499881	0	0.0112375	60.682	45.301	54.157		S	IESSILAQRRVRKLPSTTL____________	X;X;X;X;X;X;X;X;X;X;X;X;X;X;X;Phospho (STY);X;X;X;X;X;X;X;X;X;X;X;X;X;X;X	XXXXXXXXXXXXPPPPPPPXXXXXXXXXXXX	KLPS(0.5)T(0.5)TL	KLPS(0)T(0)T(-33.21)L	4	2	0.046576	0	0	0	0	0	0	0	0	0	0	0	0	0	0	0	0	0	0	721	721	1385	1503			19753	20187	Service_Sonenberg_150119_11
P18654	737	P18654	P18654	Ribosomal protein S6 kinase alpha-3	Rps6ka3		0.702879	4.45514	0.0136151	53.968	46.036	41.025	1	S	GRSTLAQRRGIKKITSTAL____________	X;X;X;X;X;X;X;X;X;X;X;X;X;X;X;Phospho (STY);X;X;X;X;X;X;X;X;X;X;X;X;X;X;X	XXXXXXXXXXXXPPPPPPPXXXXXXXXXXXX	KIT(0.252)S(0.703)T(0.045)AL	KIT(-4.46)S(4.46)T(-11.92)AL	4	2	0.67555	0	0	0	256600	356590	208940	0	0	0	0	0	0	0	0	0	390620	484350	250850	737	737	1362	1479	19403;19404;19405;19406;19407;19408	19775;19776	19404	19776	Service_Sonenberg_150119_17
P18654	715	P18654	P18654	Ribosomal protein S6 kinase alpha-3	Rps6ka3		1	74.6109	0.000751674	74.611	63.447	74.611	1	S	KGAMAATYSALNRNQSPVLEPVGRSTLAQRR	X;X;X;X;X;X;X;X;X;X;X;X;X;X;X;Phospho (STY);X;X;X;X;X;X;X;X;X;X;X;X;X;X;X	XXXXXXXXXXXXXPPPPPPPPPPPXXXXXXX	NQS(1)PVLEPVGR	NQS(74.61)PVLEPVGR	3	2	-0.68272	3627400	1218100	5042300	1498700	1879500	1858900	0	1270800	2800400	3038200	2049000	0	2818500	1658100	2259200	1534500	2469100	1843600	715	715	1851	2035	26446;26447;26448;26449;26450;26451;26452;26453;26454;26455;26456;26457;26458;26459;26460;26461	26290;26291;26292;26293;26294;26295;26296;26297;26298;26299;26300;26301;26302;26303;26304;26305;26306;26307	26457	26307	Service_Sonenberg_150119_18
P18654	369	P18654	P18654	Ribosomal protein S6 kinase alpha-3	Rps6ka3		0.526948	0.471273	3.26183e-05	49.577	40.531	49.577	1	S	TFYFDPEFTAKTPKDSPGIPPSANAHQLFRG	X;X;X;X;X;X;X;X;X;X;X;X;X;X;X;Phospho (STY);X;X;X;X;X;X;X;X;X;X;X;X;X;X;X	XXXXXXXXXXXPPPPPPPPPPPPPPPPPPPX	T(0.473)PKDS(0.527)PGIPPSANAHQLFR	T(-0.47)PKDS(0.47)PGIPPS(-32.56)ANAHQLFR	5	3	-1.5184	0	2400900	346590	0	0	0	0	0	0	0	0	0	0	0	0	135810	0	0	369	369	3148	3464	45483;45486;45489	46251	45483	46251	Service_Sonenberg_150119_2
P18760	3	P18760	P18760	Cofilin-1	Cfl1		1	63.9169	1.49375e-18	88.992	79.335	80.69	1	S	_____________MASGVAVSDGVIKVFNDM	X;X;X;X;X;X;X;X;X;X;X;X;X;X;X;Phospho (STY);X;X;X;X;X;X;X;X;X;X;X;X;X;X;X	XXXXXXXXXXXXXXPPPPPPPPPPPPPPPPP	AS(1)GVAVSDGVIK	AS(63.92)GVAVS(-63.92)DGVIK	2	2	-0.12937	15825000	212980000	390150000	348750000	301360000	273920000	14448000	237270000	377730000	315850000	235050000	280470000	385950000	5011700	356970000	296980000	7407200	295930000	3	3	264;265	290;292;293	3919;3920;3921;3922;3923;3924;3925;3926;3927;3928;3929;3930;3931;3932;3933;3934;3935;3936;3937;3938;3939;3940;3941;3942;3943;3944;3945;3946;3947;3948;3949;3950;3951;3952;3953;3954;3955;3956;3957;3958;3959;3960;3961;3962;3963;3964;3965;3966;3967;3968;3969;3970;3971;3972;3973;3974;3975;3976;3977;3978;3979;3980;3981;3982;3983;3984;3985;3986;3987;3988;3989;3990;3991;3992;3993;3994;3995;3996;3997;3998…	4123;4124;4125;4126;4127;4128;4129;4130;4131;4132;4133;4134;4135;4136;4137;4138;4139;4140;4141;4142;4143;4144;4145;4146;4147;4148;4149;4150;4151;4152;4153;4154;4155;4156;4157;4158;4159;4160;4161;4162;4163;4164;4165;4166;4167;4168;4169;4170;4171;4172;4173;4174;4175;4176;4177;4178;4179;4180;4181;4182;4183;4184;4185;4186;4187;4188;4189;4190;4191;4192;4193;4194;4195;4196;4197;4198;4199;4200;4201;4202…	4009	4570	Service_Sonenberg_150119_13
P18760	23	P18760	P18760	Cofilin-1	Cfl1		0.333333	0	0.00144523	49.448	28.076	47.712		S	SDGVIKVFNDMKVRKSSTPEEVKKRKKAVLF	X;X;X;X;X;X;X;X;X;X;X;X;X;X;X;Phospho (STY);X;X;X;X;X;X;X;X;X;X;X;X;X;X;X	XXXXXXXXXXXXXXPPPPPPPPPPXXXXXXX	KS(0.333)S(0.333)T(0.333)PEEVKK	KS(0)S(0)T(0)PEEVKK	2	3	0.50756	0	0	0	0	0	0	0	0	0	0	0	0	0	0	0	0	0	0	23	23	1475;1476	1602;1603			21044	21554	Service_Sonenberg_150119_18
P18760	24	P18760	P18760	Cofilin-1	Cfl1		0.80514	6.66322	0.000795118	92.707	37.058	81.625	1	S	DGVIKVFNDMKVRKSSTPEEVKKRKKAVLFC	X;X;X;X;X;X;X;X;X;X;X;X;X;X;X;Phospho (STY);X;X;X;X;X;X;X;X;X;X;X;X;X;X;X	XXXXXXXXXXXXXPPPPPPPPPPXXXXXXXX	KS(0.021)S(0.805)T(0.174)PEEVKK	KS(-15.78)S(6.66)T(-6.66)PEEVKK	3	2	0.072696	0	1126000	0	544590	0	7566400	0	0	1996500	3571400	1995100	1360700	1336500	0	0	7086900	0	0	24	24	1475;1476	1602;1603	21016;21020;21021;21024;21027;21029;21031;21033;21035;21039;21040;21041;21042;21043;21048;21053;21057	21543;21548;21549;21550;21551;21552;21553	21043	21552	Service_Sonenberg_150119_18
P19426	255	P19426	P19426	Negative elongation factor E	Nelfe		0.986893	18.7676	0.00866742	55.353	37.294	55.353	1	S	RDRERDREGPFRRSDSFPERRAPRKGNTLYV	X;X;X;X;X;X;X;X;X;X;X;X;X;X;X;Phospho (STY);X;X;X;X;X;X;X;X;X;X;X;X;X;X;X	XXXXXXXXXXXXPPPPPPPPPXXXXXXXXXX	RS(0.013)DS(0.987)FPER	RS(-18.77)DS(18.77)FPER	4	2	0.071454	0	0	0	0	0	563410	263320	0	0	0	710330	882970	0	0	0	1009200	0	0	255	255	2276;2428	2500;2671	32433;32434;32435;34996;34997;34998;34999;35000	31950;31951;31952;34942;34943;34944	32433	31950	Service_Sonenberg_150119_4
P19426	113	P19426	P19426	Negative elongation factor E	Nelfe		0.534879	0.607124	0.000132467	49.5	38.281	46.926	1	S	DPEKGPVPTFQPFQRSMSADEDLQEPSRRPQ	X;X;X;X;X;X;X;X;X;X;X;X;X;X;X;Phospho (STY);Oxidation (M);X;X;X;X;X;X;X;X;X;X;X;X;X;X	XXXXXXXXXXXXXXXPPPPPPPPPPPPPPPP	S(0.535)MS(0.465)ADEDLQEPSRRPQR	S(0.61)MS(-0.61)ADEDLQEPS(-43.4)RRPQR	1	3	-0.95867	0	0	0	0	0	0	0	0	0	0	850790	0	0	0	0	0	0	0	113	113	2675;2676	2943;2944	38395;38400	38627;38631	38400	38631	Service_Sonenberg_150119_8
P19426	115	P19426	P19426	Negative elongation factor E	Nelfe		0.973715	15.6872	4.10441e-14	110.38	78.059	110.38	1	S	EKGPVPTFQPFQRSMSADEDLQEPSRRPQRK	X;X;X;X;X;X;X;X;X;X;X;X;X;X;Oxidation (M);Phospho (STY);X;X;X;X;X;X;X;X;X;X;X;X;X;X;X	XXXXXXXXXXXXXPPPPPPPPPPPPPPPPPX	S(0.026)MS(0.974)ADEDLQEPSR	S(-15.69)MS(15.69)ADEDLQEPS(-83.85)R	3	2	-0.75978	0	462360	0	0	0	936560	0	0	0	599890	0	803320	0	0	0	0	1364200	1136700	115	115	2675;2676	2943;2944	38393;38394;38396;38397;38398;38399;38401;38402	38625;38626;38628;38629;38630;38632;38633	38397	38630	Service_Sonenberg_150119_18
P19426	181	P19426	P19426	Negative elongation factor E	Nelfe		0.999843	39.7883	0.0104713	69.812	25.463	68.95	1	S	FDWSYEEHGSARSSASPPRSRSRDRSHDRSR	X;X;X;X;X;X;X;X;X;X;X;X;X;X;X;Phospho (STY);X;X;X;X;X;X;X;X;X;X;X;X;X;X;X	XXXXXXXXXXXXPPPPPPPXXXXXXXXXXXX	SSAS(1)PPR	S(-42.84)S(-39.79)AS(39.79)PPR	4	2	1.2397	10401000	6156200	8994000	8372200	4216900	2999300	9608500	3114000	6959600	0	6791300	5096900	7705700	0	0	3680800	5403800	1977000	181	181	2834	3121	40987;40988;40989;40990;40991;40992;40993;40994;40995;40996;40997;40998;40999;41000;41001;41002;41003	41507;41508;41509;41510;41511;41512;41513;41514;41515;41516;41517;41518;41519;41520;41521;41522;41523;41524	40990	41511	Service_Sonenberg_150119_8
P19973	195	P19973	P19973	Lymphocyte-specific protein 1	Lsp1		0.999197	30.9517	2.1589e-05	109.24	79.895	97.214	1	S	SPPLSPTTKLADRTESLNRSIKKSNSVKKSQ	X;X;X;X;X;X;X;X;X;X;X;X;X;X;X;Phospho (STY);X;X;X;X;X;X;X;X;X;X;X;X;X;X;X	XXXXXXXXXPPPPPPPPPPXXXXXXXXXXXX	LADRT(0.001)ES(0.999)LNR	LADRT(-30.95)ES(30.95)LNR	7	3	-0.84706	3973600	0	0	0	3683700	2313100	7580200	0	7720600	8196100	5033400	2934500	0	3930300	2537100	0	5164200	6794900	195	195	1513;1514	1645;1646	21640;21641;21642;21643;21644;21645;21646;21647;21648;21649;21650;21651;21652;21653	22091;22092;22093;22094;22095;22096;22097;22098;22099;22100;22101;22102;22103;22104;22105;22106;22107	21652	22107	Service_Sonenberg_150119_18
P19973	199	P19973	P19973	Lymphocyte-specific protein 1	Lsp1		0.986831	20.5107	4.97232e-05	67.299	50.057	46.873	1	S	SPTTKLADRTESLNRSIKKSNSVKKSQPTLP	X;X;X;X;X;X;X;X;X;X;X;Phospho (STY);X;X;X;Phospho (STY);X;X;X;X;X;X;X;X;X;X;X;X;X;X;X	XXXXXPPPPPPPPPPPPPXXXXXXXXXXXXX	LADRT(0.004)ES(0.009)LNRS(0.987)IK	LADRT(-23.51)ES(-20.51)LNRS(20.51)IK	11	3	0.13246	0	1070900	0	0	0	1928000	0	0	0	6290400	1556000	1367300	995740	1627100	1185200	2296200	0	0	199	199	1514	1646	21654;21655;21656;21657;21658;21659;21660;21661;21662	22108;22109;22110	21654	22108	Service_Sonenberg_150119_6
P19973	239	P19973	P19973	Lymphocyte-specific protein 1	Lsp1		0.600676	1.77897	9.24257e-05	42.863	33.205	42.863	1	S	QYTQATESSGRTPKLSRQPSIELPSMAVAST	X;X;X;X;X;X;X;X;X;X;X;X;X;X;X;Phospho (STY);X;X;X;X;X;X;X;X;X;X;X;X;X;X;X	XXXXXXXXXXXXXXPPPPPPPPPPPPPPPPP	LS(0.601)RQPS(0.399)IELPSMAVASTK	LS(1.78)RQPS(-1.78)IELPS(-31.42)MAVAS(-40.19)T(-41.4)K	2	3	-0.65248	0	0	0	0	0	15734000	0	0	0	13732000	0	0	0	0	0	0	0	0	239	239	1665	1809;1810	23628;23629	23842	23628	23842	Service_Sonenberg_150119_6
P19973	243	P19973	P19973	Lymphocyte-specific protein 1	Lsp1		0.928379	11.2743	0.000185859	43.611	39.577	43.611	1	S	ATESSGRTPKLSRQPSIELPSMAVASTKTLW	X;X;X;X;X;X;X;X;X;X;X;X;X;X;X;Phospho (STY);X;X;X;X;X;Oxidation (M);X;X;X;X;X;X;X;X;X	XXXXXXXXXXPPPPPPPPPPPPPPPPPPXXX	LS(0.069)RQPS(0.928)IELPS(0.002)MAVASTK	LS(-11.27)RQPS(11.27)IELPS(-26.31)MAVAS(-38.4)T(-40.27)K	6	3	0.56791	0	9846200	0	0	7682300	0	9177600	14802000	8612700	0	4926400	0	3491300	1816100	6050700	1831900	11028000	0	243	243	1665	1809;1810	23617;23618;23619;23620;23621;23622;23623;23624;23625;23626;23627	23840;23841	23618	23841	Service_Sonenberg_150119_8
P20065	50	P20065	P20065	Thymosin beta-4;Hematopoietic system regulatory peptide	Tmsb4x		0.999785	36.6838	6.08307e-05	51.569	37.605	45.28	1	S	LPSKETIEQEKQAGES_______________	X;X;X;X;X;X;X;X;X;X;X;X;X;X;X;Phospho (STY);X;X;X;X;X;X;X;X;X;X;X;X;X;X;X	XXXXPPPPPPPPPPPPXXXXXXXXXXXXXXX	ETIEQEKQAGES(1)	ET(-36.68)IEQEKQAGES(36.68)	12	2	-1.0199	2434900	789580	2131600	0	0	1685500	0	985960	1924600	0	1801800	1636000	2277500	1733500	1892700	0	2526600	1615200	50	50	756	824	10639;10640;10641;10642;10643;10644;10645;10646;10647;10648;10649;10650;10651;10652	11393;11394;11395;11396;11397	10640	11395	Service_Sonenberg_150119_7
P20152	459	P20152	P20152	Vimentin	Vim		0.753429	4.85099	0.000577764	41.621	32.432	41.621	1	S	IKTVETRDGQVINETSQHHDDLE________	X;X;X;X;X;X;X;X;X;X;X;X;X;X;X;Phospho (STY);X;X;X;X;X;X;X;X;X;X;X;X;X;X;X	XXXXXXXPPPPPPPPPPPPPPPPXXXXXXXX	DGQVINET(0.247)S(0.753)QHHDDLE	DGQVINET(-4.85)S(4.85)QHHDDLE	9	2	0.23032	1379200	0	0	0	0	1321800	1859200	485610	998500	0	1787500	3772900	2100200	1056000	1070300	3165400	2578600	1626500	459	459	417	461	6104;6105;6106;6107;6108;6109;6110;6111;6112;6113;6114;6115;6116	7324	6104	7324	Service_Sonenberg_150119_18
P20152	72	P20152	P20152	Vimentin	Vim		0.769206	5.22818	0.0126907	48.998	33.369	48.998	1	S	PGGAYVTRSSAVRLRSSVPGVRLLQDSVDFS	X;X;X;X;X;X;X;X;X;X;X;X;X;X;X;Phospho (STY);X;X;X;X;X;X;X;X;X;X;X;X;X;X;X	XXXXXXXXXXXXXPPPPPPPPPXXXXXXXXX	LRS(0.769)S(0.231)VPGVR	LRS(5.23)S(-5.23)VPGVR	3	2	-0.25994	0	0	0	0	0	833800	0	0	0	1016700	854050	1587100	0	0	0	637860	2073700	2276900	72	72	1648	1791	23421;23422;23423;23424;23425;23426;23427	23655	23421	23655	Service_Sonenberg_150119_18
P20152	5	P20152	P20152	Vimentin	Vim		0.498411	1.44653	0.0150651	45.081	32.062	45.081		S	___________MSTRSVSSSSYRRMFGGSGT	X;X;X;X;X;X;X;X;X;X;X;X;X;X;X;Phospho (STY);X;X;X;X;X;X;X;X;X;X;X;X;X;X;X	XXXXXXXXXXXXXXXPPPPPPPPXXXXXXXX	S(0.498)VS(0.357)S(0.104)S(0.031)S(0.009)YR	S(1.45)VS(-1.45)S(-6.81)S(-12.08)S(-17.26)Y(-35.57)R	1	2	0.39795	0	0	0	0	0	0	0	0	0	0	0	0	0	0	0	0	0	0	5	5	2991	3289			43265	44073	Service_Sonenberg_150119_16
P20152	7	P20152	P20152	Vimentin	Vim		0.938442	13.2835	0.00517297	60.102	35.227	60.102	1	S	_________MSTRSVSSSSYRRMFGGSGTSS	X;X;X;X;X;X;X;X;X;X;X;X;X;X;X;Phospho (STY);X;X;X;X;X;X;X;X;X;X;X;X;X;X;X	XXXXXXXXXXXXXPPPPPPPPXXXXXXXXXX	S(0.003)VS(0.938)S(0.044)S(0.012)S(0.003)YR	S(-25.17)VS(13.28)S(-13.28)S(-19.11)S(-24.83)Y(-43.96)R	3	2	0.76923	0	0	0	0	0	707780	692610	0	574270	0	0	471470	764880	1047400	456250	0	2368000	1631700	7	7	2991	3289	43266;43267;43268;43269;43270;43271;43272;43273;43274	44074;44075	43267	44075	Service_Sonenberg_150119_18
P20934	197	P20934	P20934	Protein EVI2A	Evi2a		0.498936	0	2.26955e-05	40.104	36.663	40.104		S	TAESDTWKRAKELTGSNLLLQSPGVLTAARE	X;X;X;X;X;X;X;X;X;X;X;X;X;X;X;X;X;X;X;X;X;X;X;X;X;X;X;X;X;X;X	XXXXXXXXXXXXXXXXXXXXXXXXXXXXXXX	AKELT(0.499)GS(0.499)NLLLQS(0.002)PGVLTAAR	AKELT(0)GS(0)NLLLQS(-23.8)PGVLT(-40.05)AAR	7	3	0.51034	0	0	0	0	0	0	0	0	0	0	0	0	0	0	0	0	0	0	197	197	137	145			1953	1957	Service_Sonenberg_150119_2
P22682	437	P22682	P22682	E3 ubiquitin-protein ligase CBL	Cbl		0.814238	6.41795	0.0202306	56.378	16.357	56.378	1	S	KGTEPIVVDPFDPRGSGSLLRQGAEGAPSPN	X;X;X;X;X;X;X;X;X;X;X;X;X;X;X;Phospho (STY);X;X;X;X;X;X;X;X;X;X;X;X;X;X;X	XXXXXXXXXXXXXXPPPPPPPXXXXXXXXXX	GS(0.814)GS(0.186)LLR	GS(6.42)GS(-6.42)LLR	2	2	0.19251	526680	162990	407210	397300	0	0	0	0	594190	0	0	0	0	0	0	0	0	0	437	437	1007	1087	13813;13814;13815;13816;13817	14166	13813	14166	Service_Sonenberg_150119_1
P22682	838	P22682	P22682	E3 ubiquitin-protein ligase CBL	Cbl		1	46.3899	0.00529356	63.184	35.171	46.39	1	S	QVPERPPKPFPRRINSERKASSYQQGGGATA	X;X;X;X;X;X;X;X;X;X;X;X;X;X;X;Phospho (STY);X;X;X;X;X;X;X;X;X;X;X;X;X;X;X	XXXXXXXXXXXXPPPPPPPXXXXXXXXXXXX	RINS(1)ERK	RINS(46.39)ERK	4	3	0.62733	0	0	0	0	0	0	1980400	3249400	4507300	16277000	9000100	7324400	2590800	10735000	5100400	4693700	0	2604200	838	838	2137	2352	30424;30425;30426;30427;30428;30429;30430;30431;30432;30433;30434	29916;29917;29918;29919	30427	29919	Service_Sonenberg_150119_16
P22682	722	P22682	P22682	E3 ubiquitin-protein ligase CBL	Cbl		0.99454	23.288	2.83983e-05	120.53	78.318	112.64	1	S	GVQKPEPKRPLEATQSSRACDCDQQIDSCTY	X;X;X;X;X;X;X;X;X;X;X;X;X;X;X;Phospho (STY);X;X;X;X;X;X;X;X;X;X;X;X;X;X;X	XXXXXXXXPPPPPPPPPPXXXXXXXXXXXXX	RPLEAT(0.001)QS(0.995)S(0.005)R	RPLEAT(-30.97)QS(23.29)S(-23.29)R	8	2	-0.12919	8634900	0	6531000	4854300	2134600	1796700	14009000	1733100	7916200	6420700	3213500	2409600	5628000	6676000	4146400	2973400	3137700	2637500	722	722	2222	2443	31635;31636;31637;31638;31639;31640;31641;31642;31643;31644;31645;31646;31647;31648;31649;31650;31651;31652;31653;31654;31655;31656;31657;31658;31659;31660;31661;31662;31663;31664;31665;31666;31667	31148;31149;31150;31151;31152;31153;31154;31155;31156;31157;31158;31159;31160;31161;31162;31163;31164;31165;31166;31167;31168;31169;31170;31171;31172;31173;31174;31175;31176;31177;31178;31179;31180;31181;31182;31183;31184;31185;31186;31187;31188;31189;31190	31652	31184	Service_Sonenberg_150119_16
P22893	178	P22893	P22893	Tristetraprolin	Zfp36		0.965009	16.9676	0.00123957	53.252	41.933	53.252	1	S	DLALPGQPHVLRQSISFSGLPSGRRSSPPPP	X;X;X;X;X;X;X;X;X;X;X;X;X;X;X;Phospho (STY);X;X;X;X;X;X;X;X;X;X;X;X;X;X;X	XXXXXXXXXXXXPPPPPPPPPPPPXXXXXXX	QS(0.015)IS(0.965)FS(0.019)GLPSGR	QS(-18.05)IS(16.97)FS(-16.97)GLPS(-33.16)GR	4	2	-0.04863	179010	643300	0	1621500	0	2522900	161210	0	0	0	616640	436760	0	0	154640	592670	1922300	2177700	178	178	2010	2212	28577;28578;28579;28580;28581;28582;28583;28584;28585;28586;28587	28051;28052;28053;28054;28055;28056	28578	28052	Service_Sonenberg_150119_6
P22893	316	P22893	P22893	Tristetraprolin	Zfp36		0.995347	23.3026	0.000195418	67.115	59.913	67.115	1	S	QTPAPPRRLPIFNRISVSE____________	X;X;X;X;X;X;X;X;X;X;X;X;X;X;X;Phospho (STY);X;X;X;X;X;X;X;X;X;X;X;X;X;X;X	XXXXXXXPPPPPPPPPPPPXXXXXXXXXXXX	RLPIFNRIS(0.995)VS(0.005)E	RLPIFNRIS(23.3)VS(-23.3)E	9	3	0.079983	0	0	0	495260	298690	869780	0	0	0	0	83865	0	0	0	0	231960	611960	0	316	316	2163	2380	30794;30795;30796;30797;30798;30800	30288;30289;30290;30291;30292;30293;30294	30795	30289	Service_Sonenberg_150119_5
P22893	318	P22893	P22893	Tristetraprolin	Zfp36		0.531268	0.543883	0.000834574	43.628	38.349	43.628	1	S	PAPPRRLPIFNRISVSE______________	X;X;X;X;X;X;X;X;X;X;X;X;X;X;X;Phospho (STY);X;X;X;X;X;X;X;X;X;X;X;X;X;X;X	XXXXXPPPPPPPPPPPPXXXXXXXXXXXXXX	RLPIFNRIS(0.469)VS(0.531)E	RLPIFNRIS(-0.54)VS(0.54)E	11	3	0.54605	0	0	0	0	0	0	0	0	0	0	0	0	0	0	0	0	0	763110	318	318	2163	2380	30799	30295	30799	30295	Service_Sonenberg_150119_18
P22893	52	P22893	P22893	Tristetraprolin	Zfp36		0.980753	20.0822	0.00385049	89.886	52.821	55.908	1	S	SIPSGVTSRLTGRSTSLVEGRSCGWVPPPPG	X;X;X;X;X;X;X;X;X;X;X;X;X;X;X;Phospho (STY);X;X;X;X;X;X;X;X;X;X;X;X;X;X;X	XXXXXXXXXXXXXPPPPPPPPXXXXXXXXXX	S(0.01)T(0.01)S(0.981)LVEGR	S(-20.08)T(-20.08)S(20.08)LVEGR	3	2	0.10437	2444400	3577100	1487500	25433000	33543000	36275000	1665300	936900	1572300	13980000	19971000	13578000	1835300	0	1693200	29503000	43805000	30383000	52	52	2958	3255	42831;42832;42833;42834;42835;42836;42837;42838;42839;42840;42841;42842;42843;42844;42845;42846;42847	43568;43569;43570;43571;43572;43573;43574;43575;43576;43577;43578;43579;43580;43581;43582;43583;43584;43585;43586;43587;43588;43589;43590	42837	43582	Service_Sonenberg_150119_16
P23116	584	P23116	P23116	Eukaryotic translation initiation factor 3 subunit A	Eif3a		1	65.2948	0.00041389	65.295	41.019	65.295	1	S	LARRQTIEERKERLESLNIQREKEELEQREA	X;X;X;X;X;X;X;X;X;X;X;X;X;X;X;Phospho (STY);X;X;X;X;X;X;X;X;X;X;X;X;X;X;X	XXXXXXXXXXPPPPPPPPPPPXXXXXXXXXX	KERLES(1)LNIQR	KERLES(65.29)LNIQR	6	3	-0.2612	274840	318960	0	286780	263470	268040	275980	0	0	255110	206240	186680	0	0	0	165980	368230	0	584	584	1322	1433	18488;18489;18490;18491;18492;18493;18494;18495;18496;18497;18498	18721	18488	18721	Service_Sonenberg_150119_17
P23198	93	P23198	P23198	Chromobox protein homolog 3	Cbx3		0.999317	31.712	8.58755e-171	185.95	144.78	185.95	1;2	S	NSQKAGKEKDGTKRKSLSDSESDDSKSKKKR	X;X;X;X;X;X;X;X;X;X;X;X;X;X;X;Phospho (STY);X;X;X;Phospho (STY);X;X;X;X;Phospho (STY);X;X;X;X;X;X	XXXXXXXXXXXXXPPPPPPPPPPPPPPPXXX	RKS(0.999)LS(0.001)DSESDDSK	RKS(31.71)LS(-31.71)DS(-50.9)ES(-60.11)DDS(-96.2)K	3	2	-0.27458	6096900	988390	0	7594700	4391500	3007500	2006800	0	1009500	4187900	1908100	1341800	1223700	0	0	3527900	9556000	4996000	93	93	1462;1463;2153;2652;2653;2654	1589;1590;2368;2369;2918;2919;2920	20865;20869;30615;30616;30617;30618;30619;30620;30621;30622;30623;30624;30625;30626;30628;30629;30630;30631;30632;30633;30634;38091;38111;38113	21462;21463;21464;21472;21473;30012;30013;30014;30015;30016;30017;30018;30019;30020;30021;30022;30023;30024;30025;30026;30027;30029;30030;30031;30032;30033;30034;30035;30036;30037;38311;38312;38355;38356;38357;38360;38361	30620	30018	Service_Sonenberg_150119_6
P23198	95	P23198	P23198	Chromobox protein homolog 3	Cbx3		0.99976	38.9737	2.07109e-48	151.11	97.745	150.85	1	S	QKAGKEKDGTKRKSLSDSESDDSKSKKKRDA	X;X;X;X;X;X;X;X;X;X;X;X;X;X;X;Phospho (STY);X;X;X;X;X;X;X;X;X;X;X;X;X;X;X	XXXXXXXXXXXXPPPPPPPPPPPPPPPXXXX	KSLS(1)DSESDDSK	KS(-38.97)LS(38.97)DS(-39.47)ES(-67.38)DDS(-102.49)K	4	2	0.9688	11460000	6703200	7403400	8094900	3457000	3680900	17208000	3859800	9004800	12538000	6290500	4706000	0	13596000	7746500	4250000	6282800	0	95	95	1462;1463;2153;2652;2653;2654	1589;1590;2368;2369;2918;2919;2920	20853;20854;20855;20856;20857;20858;20859;20860;20861;20862;20863;20864;20866;20867;20868;20870;20871;20872;20873;20874;20875;20876;20877;20878;20879;20880;20881;20882;20883;20884;20885;20886;20887;20888;38081;38082;38083;38084;38085;38086;38087;38088;38089;38090;38091;38092;38093;38094;38095;38096;38097;38098;38100;38101;38102;38103;38104;38105;38106;38107;38108;38110;38114;38115;38117;38118;381…	21440;21441;21442;21443;21444;21445;21446;21447;21448;21449;21450;21451;21452;21453;21454;21455;21456;21457;21458;21459;21460;21461;21465;21466;21467;21468;21469;21470;21471;21474;21475;21476;21477;21478;21479;21480;21481;21482;21483;21484;21485;38294;38295;38296;38297;38298;38299;38300;38301;38302;38303;38304;38305;38306;38307;38308;38309;38310;38311;38312;38313;38314;38315;38316;38317;38318;383…	20853	21440	Service_Sonenberg_150119_1
P23198	97	P23198	P23198	Chromobox protein homolog 3	Cbx3		0.629698	5.97079	0.000181356	69.261	57.89	69.261	2	S	AGKEKDGTKRKSLSDSESDDSKSKKKRDAAD	X;X;X;X;X;X;X;X;X;X;X;Phospho (STY);X;X;X;Phospho (STY);X;X;X;X;X;X;X;X;X;X;X;X;X;X;X	XXXXXXXXXPPPPPPPPPPPPPXXXXXXXXX	RKS(0.995)LS(0.163)DS(0.63)ES(0.069)DDS(0.143)K	RKS(22.49)LS(-5.97)DS(5.97)ES(-9.59)DDS(-6.45)K	7	2	0.014537	0	0	0	0	0	0	0	0	0	0	0	0	0	0	0	0	1666300	0	97	97	1462;1463;2153;2652;2653;2654	1589;1590;2368;2369;2918;2919;2920	30634	30036;30037	30634	30036	Service_Sonenberg_150119_17
P23198	102	P23198	P23198	Chromobox protein homolog 3	Cbx3		0.644804	5.37803	0.000187621	70.47	54.247	70.47	2	S	DGTKRKSLSDSESDDSKSKKKRDAADKPRGF	X;X;X;X;X;X;Phospho (STY);X;X;X;X;X;X;X;X;Phospho (STY);X;X;X;X;X;X;X;X;X;X;X;X;X;X;X	XXXXPPPPPPPPPPPPPXXXXXXXXXXXXXX	RKS(0.964)LS(0.081)DS(0.189)ES(0.122)DDS(0.645)K	RKS(14.18)LS(-11.22)DS(-5.38)ES(-7.18)DDS(5.38)K	12	2	-0.59852	4845500	0	0	0	0	0	0	0	0	0	0	0	0	0	0	0	0	0	102	102	1462;1463;2153;2652;2653;2654	1589;1590;2368;2369;2918;2919;2920	30633	30035	30633	30035	Service_Sonenberg_150119_1
P23298	675	P23298	P23298	Protein kinase C eta type	Prkch		0.99133	20.8232	0.00395562	43.544	39.972	43.544	1	S	EGHLPMINQDEFRNFSYVSPELQL_______	X;X;X;X;X;X;X;X;X;X;X;X;X;X;X;Phospho (STY);X;X;X;X;X;X;X;X;X;X;X;X;X;X;X	XXXXXXXXXXXXXPPPPPPPPPPPXXXXXXX	NFS(0.991)YVS(0.008)PELQL	NFS(20.82)Y(-33.26)VS(-20.82)PELQL	3	2	1.2358	0	0	1697400	1173000	0	0	0	0	0	0	0	0	0	0	0	0	0	0	675	675	1781	1950	25212;25213	24999	25212	24999	Service_Sonenberg_150119_3
P23336	18	P23336	P23336	N-acetyllactosaminide alpha-1,3-galactosyltransferase	Ggta1		0.920714	10.9508	0.0070165	46.462	30.8	46.462	1	S	TMLQDLHVNKISMSRSKSETSLPSSRSGSQE	X;X;X;X;X;X;X;X;X;X;X;X;X;X;X;Phospho (STY);X;X;X;X;X;X;X;X;X;X;X;X;X;X;X	XXXXXXXXXXXXXXXPPPPPPPPPPPXXXXX	S(0.921)KS(0.074)ET(0.003)S(0.001)LPSSR	S(10.95)KS(-10.95)ET(-24.23)S(-28.36)LPS(-35.68)S(-35.68)R	1	2	-0.31367	859300	0	0	0	0	820750	0	0	0	1661900	1246700	0	0	0	0	1902100	2075600	1202900	18	18	2616	2880	37589;37590;37591;37592;37593;37594;37595	37772;37773	37590	37773	Service_Sonenberg_150119_18
P23804	183	P23804	P23804	E3 ubiquitin-protein ligase Mdm2	Mdm2		0.810633	6.3165	0.000102401	54.09	40.686	54.09	1	S	NTDELPGERHRKRRRSLSFDPSLGLCELREM	X;X;X;X;X;X;X;X;X;X;X;X;X;X;X;Phospho (STY);X;X;X;X;X;X;X;X;X;X;X;X;X;X;X	XXXXXXXXXXXXXXXPPPPPPPPPPPPPPXX	S(0.811)LS(0.189)FDPSLGLCELR	S(6.32)LS(-6.32)FDPS(-41.54)LGLCELR	1	2	0.87305	0	452500	0	0	0	0	0	0	0	0	0	0	0	0	0	0	0	0	183	183	2655	2921	38130	38377;38378	38130	38378	Service_Sonenberg_150119_2
P23949	125	P23949	P23949	Zinc finger protein 36, C3H1 type-like 2	Zfp36l2		0.649141	2.67206	0.00356347	73.951	58.195	47.288	1	S	SGTALVTKESKFRDRSFSENGERSQHLLHLQ	X;X;X;X;X;X;X;X;X;X;X;X;X;X;X;Phospho (STY);X;X;X;X;X;X;X;X;X;X;X;X;X;X;X	XXXXXXXXXXXXXPPPPPPPPPPXXXXXXXX	DRS(0.649)FS(0.351)ENGER	DRS(2.67)FS(-2.67)ENGER	3	2	-0.090823	4156500	0	0	6189100	0	0	5752800	0	3938600	7081000	0	3405900	2928700	3479500	2520200	3720800	0	2755600	125	125	502	549	7026;7031;7032;7033;7034;7035;7036;7037;7038;7039;7040	7880;7886	7026	7880	Service_Sonenberg_150119_4
P23949	127	P23949	P23949	Zinc finger protein 36, C3H1 type-like 2	Zfp36l2		0.919749	10.5922	0.0084733	51.252	38.621	47.039	1	S	TALVTKESKFRDRSFSENGERSQHLLHLQQQ	X;X;X;X;X;X;X;X;X;X;X;X;X;X;X;Phospho (STY);X;X;X;X;X;X;X;X;X;X;X;X;X;X;X	XXXXXXXXXXXPPPPPPPPPPXXXXXXXXXX	DRS(0.08)FS(0.92)ENGER	DRS(-10.59)FS(10.59)ENGER	5	2	-0.16135	0	0	0	0	4103000	3337100	0	0	0	0	5651300	0	0	0	0	0	6042100	0	127	127	502	549	7027;7028;7029;7030	7881;7882;7883;7884;7885	7029	7884	Service_Sonenberg_150119_11
P23949;P23950	480;334	P23949	P23949	Zinc finger protein 36, C3H1 type-like 2;Zinc finger protein 36, C3H1 type-like 1	Zfp36l2;Zfp36l1		0.773691	7.89717	0.000211293	46.408	38.497	46.408	1	S	PSLDPGRRLPIFSRLSISDD___________	X;X;X;X;X;X;X;X;X;X;X;X;X;X;X;Phospho (STY);X;X;X;X;X;X;X;X;X;X;X;X;X;X;X	XXXXXXXPPPPPPPPPPPPPXXXXXXXXXXX	RLPIFS(0.101)RLS(0.774)IS(0.126)DD	RLPIFS(-8.85)RLS(7.9)IS(-7.9)DD	9	3	0.090906	0	0	0	682850	0	578890	0	0	238190	0	234790	309910	145030	61570	174090	0	0	419870	480	480	2164	2381	30801;30802;30803;30804;30805;30806;30807;30808;30809	30296;30297;30298;30299;30300;30301	30803	30298	Service_Sonenberg_150119_11
P24452	327	P24452	P24452	Macrophage-capping protein	Capg		0.706488	5.66627	7.70942e-08	58.49	48.568	58.49	1	S	AALQVADGFISRMRYSPNTQVEILPQGRESP	X;X;X;X;X;X;X;X;X;X;X;X;X;X;X;Phospho (STY);X;X;X;X;X;X;X;X;X;X;X;X;X;X;X	XXXXXXXXXXXXPPPPPPPPPPPPPPPPXXX	MRY(0.102)S(0.706)PNT(0.192)QVEILPQGR	MRY(-8.41)S(5.67)PNT(-5.67)QVEILPQGR	4	3	-0.26516	0	0	0	690510	729960	0	1041000	762960	0	0	574420	0	314010	829320	392860	449490	901000	1350700	327	327	1741	1903	24572;24573;24574;24575;24576;24577;24578;24579;24580;24581;24582	24462	24572	24462	Service_Sonenberg_150119_18
P24788	578	P24788	P24788	Cyclin-dependent kinase 11B	Cdk11b		0.998487	28.1953	0.0348609	44.349	20.554	44.349	1	S	GILKVGDFGLAREYGSPLKAYTPVVVTLWYR	X;X;X;X;X;X;X;X;X;X;X;X;X;X;X;Phospho (STY);X;X;X;X;X;X;X;X;X;X;X;X;X;X;X	XXXXXXXXXXXXPPPPPPPXXXXXXXXXXXX	EY(0.002)GS(0.998)PLK	EY(-28.2)GS(28.2)PLK	4	2	0.58809	2596500	680350	0	0	0	878040	1213100	1296600	1460100	1445300	1688300	0	2389300	1982100	1911100	0	2137000	1143500	578	578	781	852	11042;11043;11044;11045;11046;11047;11048;11049;11050;11051;11052;11053;11054	11771	11042	11771	Service_Sonenberg_150119_8
P25206	668	P25206	P25206	DNA replication licensing factor MCM3	Mcm3		0.525061	0.437722	1.36695e-08	53.779	40.187	53.779	1	S	YFKKVLEKEKKRKKASEDESDLEDEEEKSQE	X;X;X;X;X;X;X;X;X;X;X;X;X;X;X;Phospho (STY);X;X;X;X;X;X;X;X;X;X;X;X;X;X;X	XXXXXXXXXXXXXXPPPPPPPPPPPPPPPPP	AS(0.525)EDES(0.475)DLEDEEEKSQEDTEQKR	AS(0.44)EDES(-0.44)DLEDEEEKS(-34.02)QEDT(-46.9)EQKR	2	3	-1.9905	1538000	2050600	0	0	0	2349200	3312800	2420900	1481700	0	1581000	1806800	1679500	0	0	0	0	1639500	668	668	258	283	3859;3860;3861;3862;3863;3864;3865;3866;3867;3868	4085;4086;4087	3861	4087	Service_Sonenberg_150119_18
P25444	281	P25444	P25444	40S ribosomal protein S2	Rps2		0.993654	22.5215	0.00094196	64.439	47.37	60.49	1	S	YQEFTDHLVKTHTRVSVQRTQAPAVATT___	X;X;X;X;X;X;X;X;X;X;X;X;X;X;X;Phospho (STY);X;X;X;X;X;X;X;X;X;X;X;X;X;X;X	XXXXXXXXXXPPPPPPPPPXXXXXXXXXXXX	T(0.001)HT(0.006)RVS(0.994)VQR	T(-31.02)HT(-22.52)RVS(22.52)VQR	6	3	0.0082287	8497000	1038200	0	10092000	6719400	5794400	11263000	0	7209100	0	5931200	0	2981400	7611600	3571000	0	5734500	4921600	281	281	3089	3398	44711;44712;44713;44714;44715;44716;44718;44720;44721;44722;44723;44725;44726;44727;44728;44729;44730;44731;44732;44733;44734;44735;44736	45617;45618;45619;45620;45621;45622;45623;45624;45627;45628;45631;45632;45633;45634;45635;45636;45637;45638;45639;45642;45643;45644;45645;45646	44714	45621	Service_Sonenberg_150119_6
P26039	1328	P26039	P26039	Talin-1	Tln1		0.999989	50.5902	0.000312559	87.216	73.407	86.911	1	S	SKLLLAAKALSTDPASPNLKSQLAAAARAVT	X;X;X;X;X;X;X;X;X;X;X;X;X;X;X;Phospho (STY);X;X;X;X;X;X;X;X;X;X;X;X;X;X;X	XXXXXXXXPPPPPPPPPPPPXXXXXXXXXXX	ALSTDPAS(1)PNLK	ALS(-56.18)T(-50.59)DPAS(50.59)PNLK	8	2	-0.81636	2739800	933090	2282400	1525700	2248200	1623600	4503000	1214400	3442700	2981500	3052700	2499000	1833000	0	1940900	0	245390	2019900	1328	1328	182	196	2676;2677;2678;2679;2680;2681;2682;2683;2684;2685;2686;2687;2688;2689;2690;2691;2692;2693;2694;2695;2696;2697	2646;2647;2648;2649;2650;2651;2652;2653;2654;2655;2656;2657;2658;2659;2660;2661;2662;2663;2664;2665;2666;2667;2668;2669;2670;2671;2672	2677	2648	Service_Sonenberg_150119_2
P26039	1201	P26039	P26039	Talin-1	Tln1		1	71.4507	0.00112553	91.867	74.047	71.451	1	S	AQVAKAVTQALNRCVSCLPGQRDVDNALRAV	X;X;X;X;X;X;X;X;X;X;X;X;X;X;X;Phospho (STY);X;X;X;X;X;X;X;X;X;X;X;X;X;X;X	XXXXXXXXXXXXXPPPPPPPPPXXXXXXXXX	CVS(1)CLPGQR	CVS(71.45)CLPGQR	3	2	0.25014	261520	0	0	1362100	2790700	1996700	0	167980	308050	2280300	2517800	2087800	0	0	0	493550	2510500	1044300	1201	1201	380	417	5559;5560;5561;5562;5563;5564;5565;5566;5567;5568;5569;5570	6915;6916;6917;6918;6919;6920;6921;6922;6923;6924;6925;6926;6927;6928;6929	5566	6929	Service_Sonenberg_150119_18
P26039	1641	P26039	P26039	Talin-1	Tln1		0.988364	19.317	0.00358379	60.892	15.403	60.892	1	S	DPPRWSVLAGHSRTVSDSIKKLITSMRDKAP	X;X;X;X;X;X;X;X;X;X;X;X;X;X;X;Phospho (STY);X;X;X;X;X;X;X;X;X;X;X;X;X;X;X	XXXXXXXXXXXXXPPPPPPPPXXXXXXXXXX	TVS(0.988)DS(0.012)IK	T(-41.53)VS(19.32)DS(-19.32)IK	3	2	0.077614	20600000	12064000	8676600	15886000	13914000	11011000	0	11563000	18072000	23180000	15080000	16539000	18379000	21137000	13669000	11152000	12714000	4523100	1641	1641	3242;3243	3565;3566	46958;46959;46960;46961;46962;46963;46964;46965;46966;46967;46968;46969;46970;46971;46972;46973;46974;46975;46976;46977;46978;46979;46980;46981;46982;46983;46984;46985;46986;46987;46988	47611;47612;47613;47614;47615;47616	46960	47613	Service_Sonenberg_150119_17
P26041	576	P26041	P26041	Moesin	Msn		1	93.6488	4.02092e-46	136.57	111.22	93.649	1	S	QIRQGNTKQRIDEFESM______________	X;X;X;X;X;X;X;X;X;X;X;X;X;X;X;Phospho (STY);Oxidation (M);X;X;X;X;X;X;X;X;X;X;X;X;X;X	XXXXXXXXPPPPPPPPPXXXXXXXXXXXXXX	QRIDEFES(1)M	QRIDEFES(93.65)M	8	2	0.41543	3216100	2176100	3141300	2880900	4019900	3605700	1891700	1800900	1761500	2019500	1276600	2052300	1076700	913720	1071100	2510400	2827000	2954600	576	576	2003	2202;2203	28461;28462;28463;28464;28465;28466;28467;28468;28469;28470;28471;28472;28473;28474;28475;28476;28477;28478;28479;28480;28481;28482;28483;28484;28485;28486;28487;28488;28489;28490;28491;28492;28493;28494;28495;28496	27926;27927;27928;27929;27930;27931;27932;27933;27934;27935;27936;27937;27938;27939;27940;27941;27942;27943;27944;27945;27946;27947;27948;27949;27950;27951;27952;27953;27954;27955;27956;27957;27958;27959;27960;27961;27962;27963;27964;27965;27966;27967;27968;27969;27970;27971;27972;27973;27974;27975;27976;27977;27978;27979;27980;27981;27982;27983;27984;27985;27986	28496	27985	Service_Sonenberg_150119_18
P26151	347	P26151	P26151	High affinity immunoglobulin gamma Fc receptor I	Fcgr1		1	58.7431	0.0006825	108.98	53.996	58.743	1	S	NLEVPLVSEQGKKANSFQQVRSDGVYEEVTA	X;X;X;X;X;X;X;X;X;X;X;X;X;X;Deamidation (NQ);Phospho (STY);X;X;X;X;X;X;X;X;X;X;X;X;X;X;X	XXXXXXXXXXXXPPPPPPPPPXXXXXXXXXX	KANS(1)FQQVR	KANS(58.74)FQQVR	4	2	0.59139	2138200	994530	1593400	1883100	1820900	1323400	2081000	1025400	3339100	1977900	1732300	1413200	1602900	2284300	1476700	1565900	2238700	2181100	347	347	197;1288	215;216;1397;1398	2883;2884;2885;2886;2887;2888;2889;2890;2891;2892;2893;2894;2895;2896;2897;18025;18026;18027;18028;18029;18030;18031;18032;18033;18034;18035;18036;18037;18038;18039;18040;18041;18042;18043;18044;18045;18046;18047;18048;18049;18050;18051;18052;18053;18054;18055;18056;18057;18058;18059;18060;18061;18062;18063;18064	2806;2807;2808;2809;2810;2811;2812;2813;2814;2815;2816;2817;2818;2819;2820;2821;2822;2823;2824;2825;2826;2827;2828;2829;2830;2831;2832;2833;2834;2835;2836;2837;2838;2839;2840;2841;2842;2843;2844;2845;18328;18329;18330;18331;18332;18333;18334;18335;18336;18337;18338;18339;18340;18341;18342;18343;18344;18345;18346;18347;18348;18349;18350;18351;18352;18353;18354;18355;18356;18357;18358;18359;18360;1…	18060	18368	Service_Sonenberg_150119_18
P26323	39	P26323	P26323	Friend leukemia integration 1 transcription factor	Fli1		0.944269	12.4178	0.000231225	49.595	36.799	49.595	1	S	GAAAHLPKADMTASGSPDYGQPHKINPLPPQ	X;X;X;X;X;X;X;X;X;X;X;X;X;X;X;Phospho (STY);X;X;X;X;X;X;X;X;X;X;X;X;X;X;X	XXXXXXXXPPPPPPPPPPPPPPPPXXXXXXX	ADMT(0.001)AS(0.054)GS(0.944)PDYGQPHK	ADMT(-28.75)AS(-12.42)GS(12.42)PDY(-34.21)GQPHK	8	2	0.86594	0	0	0	0	0	1714200	4461000	0	0	2288400	0	0	0	3283700	1424800	0	0	0	39	39	44	47	527;528;529;530;531	529	527	529	Service_Sonenberg_150119_7
P26369	79	P26369	P26369	Splicing factor U2AF 65 kDa subunit	U2af2		1	83.6916	2.73113e-15	118.61	100.42	83.692	1	S	PLTRGAKEEHGGLIRSPRHEKKKKVRKYWDV	X;X;X;X;X;X;X;X;X;X;X;X;X;X;X;Phospho (STY);X;X;X;X;X;X;X;X;X;X;X;X;X;X;X	XXXXPPPPPPPPPPPPPPXXXXXXXXXXXXX	GAKEEHGGLIRS(1)PR	GAKEEHGGLIRS(83.69)PR	12	2	0.40742	5256400	0	5133300	4740200	10823000	3647900	6561700	3850200	4299600	3935300	4530600	3654800	4186000	9253100	4247100	2949600	0	3807800	79	79	599;851	653;925	8395;8396;8397;8398;8399;8400;8401;8402;8403;8404;8405;8406;8407;8408;8409;11911;11912;11913;11914;11915;11916;11917;11918;11919;11920;11921;11922;11923;11924;11925;11926;11927;11928;11929;11930;11931;11932;11933;11934;11935;11936;11937;11938;11939	9246;12449;12450;12451;12452;12453;12454;12455;12456;12457;12458;12459;12460;12461;12462;12463;12464;12465;12466;12467;12468;12469;12470;12471;12472;12473;12474;12475;12476;12477;12478;12479;12480;12481;12482;12483;12484;12485;12486;12487;12488;12489;12490;12491;12492;12493;12494	11935	12494	Service_Sonenberg_150119_18
P26369	2	P26369	P26369	Splicing factor U2AF 65 kDa subunit	U2af2		1	84.2126	0.0009587	84.213	67.879	84.213	1	S	______________MSDFDEFERQLNENKQE	X;X;X;X;X;X;X;X;X;X;X;X;X;X;X;Phospho (STY);X;X;X;X;X;X;X;X;X;X;X;X;X;X;X	XXXXXXXXXXXXXXXPPPPPPPPXXXXXXXX	S(1)DFDEFER	S(84.21)DFDEFER	1	2	-1.4201	2234300	1467300	2567700	0	0	1851500	1663800	0	2087300	982140	0	1080300	1722900	850480	1572600	1624400	1373900	1648200	2	2	2421	2663	34863;34864;34865;34866;34867;34868;34869;34870;34871;34872;34873;34874;34875;34876	34747;34748;34749;34750;34751;34752;34753;34754;34755;34756;34757;34758;34759;34760;34761;34762;34763;34764;34765;34766;34767;34768;34769;34770;34771	34876	34770	Service_Sonenberg_150119_18
P26645	138	P26645	P26645	Myristoylated alanine-rich C-kinase substrate	Marcks		0.986926	20.1555	1.9761e-36	123.72	93.697	86.214	1;2	S	ASSTSSPKAEDGAAPSPSSETPKKKKKRFSF	X;X;X;X;X;X;X;X;X;X;X;X;X;X;X;Phospho (STY);X;X;X;X;Phospho (STY);X;X;X;X;X;X;X;X;Phospho (STY);X	XXXXXXXXPPPPPPPPPPPPPPPPPXXXXXX	AEDGAAPS(0.987)PS(0.01)S(0.003)ET(0.001)PKK	AEDGAAPS(20.16)PS(-20.16)S(-25.56)ET(-30.88)PKK	8	2	-0.32465	5288400	842510	10834000	4606800	4729800	3470500	8942500	1512400	3654200	7690700	7670600	3944200	4345400	6064300	3074900	5776000	9257800	4545000	138	138	56;57;58	59;60;61;62	644;646;649;652;654;656;658;660;662;664;666;668;672;674;675;681;682;685;687;690;692;694;697;699;702;705;708;711;713;716;718;719;721;723;726;727;728;729;730;731;732;733;734;735;765;766;767;768;769;770;771;772;773;774;775	634;638;644;648;649;653;654;655;660;661;666;667;672;673;674;679;681;684;687;696;700;701;702;703;704;705;710;711;712;714;715;718;719;720;722;723;724;726;727;728;734;735;736;739;740;746;747;748;754;755;759;760;766;767;770;771;772;777;778;781;782;783;785;786;787;790;791;795;796;797;798;833;834;835	711	766	Service_Sonenberg_150119_12
P26645	140	P26645	P26645	Myristoylated alanine-rich C-kinase substrate	Marcks		0.54633	2.67137	1.83999e-11	97.203	79.339	97.203	1	S	STSSPKAEDGAAPSPSSETPKKKKKRFSFKK	X;X;X;X;X;X;X;X;X;X;X;X;X;X;X;Phospho (STY);X;X;X;X;X;X;X;X;X;X;X;Phospho (STY);X;X;X	XXXXXXPPPPPPPPPPPPPPPXXXXXXXXXX	AEDGAAPS(0.093)PS(0.546)S(0.295)ET(0.065)PK	AEDGAAPS(-7.7)PS(2.67)S(-2.67)ET(-9.21)PK	10	2	-0.42871	0	0	0	0	0	8917600	0	0	0	0	0	0	0	0	0	0	0	0	140	140	56;57;58	59;60;61;62	653	650;651;652	653	650	Service_Sonenberg_150119_6
P26645	141	P26645	P26645	Myristoylated alanine-rich C-kinase substrate	Marcks		0.707838	4.29273	7.5015e-20	105.14	93.605	91.812	1	S	TSSPKAEDGAAPSPSSETPKKKKKRFSFKKS	X;X;X;X;X;X;X;X;X;X;X;X;X;X;X;Phospho (STY);X;X;X;X;X;X;X;X;X;X;Phospho (STY);X;X;X;Phospho (STY)	XXXXXPPPPPPPPPPPPPPPPXXXXXXXXXX	AEDGAAPS(0.001)PS(0.028)S(0.708)ET(0.263)PK	AEDGAAPS(-29.52)PS(-14.04)S(4.29)ET(-4.29)PK	11	2	-0.34409	0	0	0	0	0	0	0	0	0	0	0	0	0	0	0	7166300	12175000	0	141	141	56;57;58	59;60;61;62	671;673;695	694;695;697;698;699;729;730;731;732	671	695	Service_Sonenberg_150119_16
P26645	152	P26645	P26645	Myristoylated alanine-rich C-kinase substrate	Marcks		1	41.6892	0.00356509	50.791	33.849	41.689	2	S	PSPSSETPKKKKKRFSFKKSFKLSGFSFKKS	X;Phospho (STY);X;Phospho (STY);Phospho (STY);X;Phospho (STY);X;X;X;X;X;X;X;X;Phospho (STY);X;X;X;Phospho (STY);X;X;X;X;X;X;Phospho (STY);X;X;X;X	XXXXXXXXXXXXXXPPPPPPPPXXXXXXXXX	FS(1)FKKS(1)FK	FS(41.69)FKKS(41.69)FK	2	3	0.13203	0	0	0	0	160700	120190	0	219420	0	141620	91228	103060	395520	0	0	246940	180740	197640	152	152	825	899	11566;11567;11568;11569;11570;11571;11572;11573;11574;11575	12229;12230	11567	12230	Service_Sonenberg_150119_16
P26645	156	P26645	P26645	Myristoylated alanine-rich C-kinase substrate	Marcks		1	41.6892	0.00356509	50.791	33.849	41.689	2	S	SETPKKKKKRFSFKKSFKLSGFSFKKSKKES	Phospho (STY);X;Phospho (STY);X;X;X;X;X;X;X;X;Phospho (STY);X;X;X;Phospho (STY);X;X;X;X;X;X;Phospho (STY);X;X;X;X;X;X;X;X	XXXXXXXXXXPPPPPPPPXXXXXXXXXXXXX	FS(1)FKKS(1)FK	FS(41.69)FKKS(41.69)FK	6	3	0.13203	0	0	0	0	160700	120190	0	219420	0	141620	91228	103060	395520	0	0	246940	180740	197640	156	156	825	899	11566;11567;11568;11569;11570;11571;11572;11573;11574;11575	12229;12230	11567	12230	Service_Sonenberg_150119_16
P26645	163	P26645	P26645	Myristoylated alanine-rich C-kinase substrate	Marcks		0.999996	53.5942	0.00254791	76.221	57.416	74.464	1	S	KKRFSFKKSFKLSGFSFKKSKKESGEGAEAE	X;X;X;X;Phospho (STY);X;X;X;Phospho (STY);X;X;X;X;X;X;Phospho (STY);X;X;X;X;X;X;X;X;X;X;X;X;X;X;X	XXXXXXXXXXXPPPPPPPPXXXXXXXXXXXX	LSGFS(1)FKK	LS(-53.59)GFS(53.59)FKK	5	2	-0.60117	384600	458690	1989400	702370	1090200	462070	3812200	477360	2297900	1954100	610010	0	0	658960	32077	0	1019900	2999400	163	163	1654;1655	1797;1798	23480;23481;23482;23483;23484;23485;23486;23487;23488;23489;23490;23491;23492;23493;23494;23495;23496;23497;23498;23499;23500;23501;23502	23670;23671;23672;23673;23674;23675;23676;23677;23678;23679;23680;23681;23682;23683;23684;23685;23686;23687;23688;23689;23690;23691;23692;23693;23694;23695;23696;23697;23698;23699;23700	23499	23695	Service_Sonenberg_150119_14
P27546	785	P27546	P27546	Microtubule-associated protein 4	Map4		0.497046	0	0.000389052	51.013	40.781	51.013		S	LKPGPKTTPTVSKATSPSTLVSTGPSSRSPA	X;X;X;X;X;X;X;X;X;X;X;X;X;X;X;X;X;X;X;X;X;X;X;X;X;X;X;X;X;X;X	XXXXXXXXXXXXXXXXXXXXXXXXXXXXXXX	AT(0.497)S(0.497)PS(0.004)T(0.002)LVSTGPSSR	AT(0)S(0)PS(-20.88)T(-24.58)LVS(-40.38)T(-40.07)GPS(-46.62)S(-46.62)R	3	2	-0.43999	0	0	0	0	0	0	0	0	0	0	0	0	0	0	0	0	0	0	785	785	313	348			4796	5953	Service_Sonenberg_150119_6
P27546	517	P27546	P27546	Microtubule-associated protein 4	Map4		0.994501	22.6324	3.86873e-05	62.408	49.427	57.328	1	S	VTPLSEEEVTSVKDMSPSAETEAPLAKNADL	X;X;X;X;X;X;X;X;X;X;X;X;X;X;Oxidation (M);Phospho (STY);X;X;X;X;X;X;X;X;X;X;X;X;X;X;X	XXXXXXXXXXXXXPPPPPPPPPPPPPPXXXX	DMS(0.995)PS(0.005)AETEAPLAK	DMS(22.63)PS(-22.63)AET(-41.23)EAPLAK	3	2	0.33017	3034900	1404200	1089000	2376900	0	1969200	0	0	2237100	0	2115200	2333300	0	1180500	2127300	0	0	2277600	517	517	473	519;520	6709;6710;6711;6712;6713;6714;6715;6716;6717;6718;6719;6720;6721;6722;6723;6724;6725;6726;6727;6728	7718;7719;7720;7721;7722;7723;7724;7725;7726;7727	6722	7726	Service_Sonenberg_150119_18
P27546	910	P27546	P27546	Microtubule-associated protein 4	Map4		0.362325	0.555288	0.000294161	44.252	34.331	44.252		S	RLATTVSAPDLKSVRSKVGSTENIKHQPGGG	X;X;X;X;X;X;X;X;X;X;X;X;X;X;X;Phospho (STY);X;X;X;Phospho (STY);Phospho (STY);X;X;X;X;X;X;X;X;X;X	XXXXXXXXXXXXXXXPPPPPPPPPPPPPPPP	S(0.362)KVGS(0.319)T(0.319)ENIKHQPGGGR	S(0.56)KVGS(-0.56)T(-0.56)ENIKHQPGGGR	1	4	-0.42922	0	0	0	0	0	0	0	0	0	0	0	0	0	0	0	0	0	0	910	910	2624;2625	2889;2890			37715	37852	Service_Sonenberg_150119_10
P27546	914	P27546	P27546	Microtubule-associated protein 4	Map4		0.921556	10.6996	2.95439e-16	100.02	84.582	47.853	1	S	TVSAPDLKSVRSKVGSTENIKHQPGGGRAKV	X;X;X;X;X;X;X;X;X;X;X;X;X;X;X;Phospho (STY);X;X;X;X;X;X;X;X;X;X;X;X;X;X;X	XXXXXXXXXXXPPPPPPPPPPPPPPPPPXXX	VGS(0.922)T(0.078)ENIK	VGS(10.7)T(-10.7)ENIK	3	2	1.0412	16482000	5214900	15396000	5134100	3758800	0	19495000	5179500	13123000	15146000	0	0	0	21748000	10992000	2448800	5623100	7236900	914	914	2624;2625;3306;3307	2889;2890;3636;3637	37690;37691;37692;37693;37694;37695;37696;37697;37698;37699;37700;37701;37702;37703;37704;37706;37707;37708;37709;37712;37714;37716;37718;37720;37721;37722;47887;47888;47889;47891;47892;47893;47894;47895;47896	37819;37820;37821;37822;37823;37824;37825;37826;37827;37828;37829;37830;37831;37832;37833;37834;37835;37836;37837;37839;37840;37841;37842;37843;37846;37847;37848;37850;37851;37853;37854;37856;37857;37859;37860;37861;37862;37863;37864;37865;37866;48455;48456;48457;48459;48460;48461;48462;48463	47891	48459	Service_Sonenberg_150119_12
P27546	762	P27546	P27546	Microtubule-associated protein 4	Map4		0.317504	0.475446	0.000138965	42.813	35.98	42.813		S	KPITEAKVAEKRTSPSKPSSAPALKPGPKTT	X;X;X;X;X;X;X;X;X;X;X;X;X;X;X;Phospho (STY);X;X;X;X;X;X;X;X;X;X;X;X;X;X;X	XXXXXXXXXXXXPPPPPPPPPPPPPPPPPXX	T(0.285)S(0.285)PS(0.318)KPS(0.057)S(0.057)APALKPGPK	T(-0.48)S(-0.48)PS(0.48)KPS(-7.48)S(-7.48)APALKPGPK	4	3	0.018731	0	0	0	0	0	0	0	0	0	0	0	0	0	0	0	0	0	0	762	762	3197	3516			46312	47043	Service_Sonenberg_150119_12
P27546	1046	P27546	P27546	Microtubule-associated protein 4	Map4		1	62.3773	2.92238e-09	62.377	52.945	62.377	1	S	SQKLNFKEKAQAKVGSLDNVGHLPAGGAVKT	X;X;X;X;X;X;X;X;X;X;X;X;X;X;X;Phospho (STY);X;X;X;X;X;X;X;X;X;X;X;X;X;X;X	XXXXXXXXXXXXXPPPPPPPPPPPPPPPPPX	VGS(1)LDNVGHLPAGGAVK	VGS(62.38)LDNVGHLPAGGAVK	3	2	1.4588	0	1843300	0	744120	646460	906320	0	0	1479700	0	999190	0	1775900	0	1850700	435280	901020	820860	1046	1046	3303	3633	47840;47841;47842;47843;47844;47845;47846;47847;47848;47849;47850;47851;47852;47853;47854;47855;47856;47857;47858;47859	48392;48393;48394	47842	48394	Service_Sonenberg_150119_2
P28028	454	P28028	P28028	Serine/threonine-protein kinase B-raf	Braf		1	119.528	3.34598e-07	132.88	111.13	119.53	1	S	ASLPGSLTNVKALQKSPGPQRERKSSSSSSS	X;X;X;X;X;X;X;X;X;X;X;X;X;X;X;Phospho (STY);X;X;X;X;X;X;X;X;X;X;X;X;X;X;X	XXXXXXXXXXXPPPPPPPPPPXXXXXXXXXX	ALQKS(1)PGPQR	ALQKS(119.53)PGPQR	5	2	0.45698	3403300	1076100	6965700	4557300	2641300	2154300	13185000	1121100	6830000	8288800	3428300	523380	0	6844300	690540	974790	3565200	3161200	454	454	174	185	2531;2532;2533;2534;2535;2536;2537;2538;2539;2540;2541;2542;2543;2544;2545;2546;2547;2548;2549;2550;2551;2552;2553	2507;2508;2509;2510;2511;2512;2513;2514;2515;2516;2517;2518;2519;2520;2521;2522;2523;2524;2525;2526;2527;2528;2529;2530	2546	2529	Service_Sonenberg_150119_18
P28028	135	P28028	P28028	Serine/threonine-protein kinase B-raf	Braf		1	44.9681	0.00035727	80.245	71.286	44.968	1	S	LVFQTPTDASRNNPKSPQKPIVRVFLPNKQR	X;X;X;X;X;X;X;X;X;X;X;X;X;X;X;Phospho (STY);X;X;X;X;X;X;X;X;X;X;X;X;X;X;X	XXXXXXXXXXXPPPPPPPPPPPPXXXXXXXX	NNPKS(1)PQKPIVR	NNPKS(44.97)PQKPIVR	5	3	0.39674	1224200	0	0	2660300	1628300	1971200	2780000	589340	1293600	0	2873400	2106300	2165500	2367900	1728300	2244800	4409000	872190	135	135	1841	2021	26192;26193;26194;26195;26196;26197;26198;26199;26200;26201;26202;26203;26204;26205;26206;26207;26208;26209;26210;26211;26212;26213;26214;26215;26216;26217;26218;26219;26220	26042;26043;26044;26045;26046;26047;26048;26049;26050;26051;26052;26053;26054;26055;26056;26057;26058;26059;26060;26061;26062;26063;26064;26065;26066;26067;26068;26069;26070;26071;26072;26073	26214	26073	Service_Sonenberg_150119_18
P28028	766	P28028	P28028	Serine/threonine-protein kinase B-raf	Braf		0.999011	30.0632	0.00138275	99.815	55.497	98.044	1	S	IELLARSLPKIHRSASEPSLNRAGFQTEDFS	X;X;X;X;X;X;X;X;X;X;X;X;X;X;X;Phospho (STY);X;X;X;X;X;X;X;X;X;X;X;X;X;X;X	XXXXXXXXXXXXXPPPPPPPPPXXXXXXXXX	S(0.001)AS(0.999)EPSLNR	S(-30.06)AS(30.06)EPS(-53.18)LNR	3	2	-0.35592	14651000	4430800	11703000	10404000	8630000	6310500	17073000	5488500	13184000	10617000	11257000	10348000	15922000	12441000	15019000	12667000	13532000	9234000	766	766	2389	2622	34183;34184;34185;34186;34187;34188;34189;34190;34191;34192;34193;34194;34195;34196;34197;34198;34199;34200	33915;33916;33917;33918;33919;33920;33921;33922;33923;33924;33925;33926;33927;33928;33929;33930;33931;33932;33933;33934;33935;33936;33937;33938;33939;33940;33941;33942;33943;33944;33945;33946;33947;33948;33949;33950;33951;33952;33953;33954;33955;33956;33957;33958;33959;33960;33961;33962;33963;33964;33965;33966;33967;33968;33969;33970;33971;33972;33973;33974;33975;33976;33977;33978;33979;33980;339…	34189	33944	Service_Sonenberg_150119_7
P28352	18	P28352	P28352	DNA-(apurinic or apyrimidinic site) lyase;DNA-(apurinic or apyrimidinic site) lyase, mitochondrial	Apex1		0.999706	35.3117	4.97223e-155	175.27	152.47	119.58	1	S	KRGKKAAADDGEEPKSEPETKKSKGAAKKTE	X;X;X;X;X;X;X;X;X;X;X;X;X;X;X;Phospho (STY);X;X;X;X;X;X;X;X;X;X;X;X;X;X;X	XXXXXPPPPPPPPPPPPPPPPPXXXXXXXXX	AAADDGEEPKS(1)EPETK	AAADDGEEPKS(35.31)EPET(-35.31)K	11	2	0.95375	1634500	1185600	0	0	1143500	1113600	3724500	1008900	2653000	2715200	0	1088600	2078800	3460000	0	1424200	974530	0	18	18	1;2	1;2	1;2;3;4;5;6;7;8;9;10;11;12;13;14;15;16;17;18;19;20;21;22;23;24;25;26;27	1;2;3;4;5;6;7;8;9;10;11;12;13;14;15;16;17;18;19;20;21;22;23;24;25;26;27;28;29;30;31;32	1	1	Service_Sonenberg_150119_1
P46664;P28650	448;449	P46664	P46664	Adenylosuccinate synthetase isozyme 2;Adenylosuccinate synthetase isozyme 1	Adss;Adssl1		0.5	0	0.0130675	48.44	41.552	41.399	1	S	EDELQIPVKWIGVGKSRESMIQLF_______	X;X;X;X;X;X;X;X;X;X;X;X;X;X;X;Phospho (STY);X;X;X;X;X;X;X;X;X;X;X;X;X;X;X	XXXXXXXXXXXXXXXPPPPPPPPPXXXXXXX	S(0.5)RES(0.5)MIQLF	S(0)RES(0)MIQLF	1	2	0.035509	402550	0	0	257820	197770	163290	0	0	114720	0	0	0	177070	122450	130870	113200	127940	131140	448	448	2782	3062	39979;39981;39982;39983;39984;39986;39988;39989;39990;39991;39992	40266;40269;40270	39982	40270	Service_Sonenberg_150119_13
P46664;P28650	451;452	P46664	P46664	Adenylosuccinate synthetase isozyme 2;Adenylosuccinate synthetase isozyme 1	Adss;Adssl1		0.834628	7.03032	0.00788291	55.314	49.279	55.314	1	S	LQIPVKWIGVGKSRESMIQLF__________	X;X;X;X;X;X;X;X;X;X;X;X;X;X;X;Phospho (STY);X;X;X;X;X;X;X;X;X;X;X;X;X;X;X	XXXXXXXXXXXXPPPPPPPPPXXXXXXXXXX	S(0.165)RES(0.835)MIQLF	S(-7.03)RES(7.03)MIQLF	4	2	0.18958	402550	0	376180	257820	197770	163290	219620	0	114720	99459	0	0	177070	122450	130870	113200	127940	131140	451	451	2782	3062	39979;39980;39981;39982;39983;39984;39985;39986;39987;39988;39989;39990;39991;39992	40266;40267;40268;40269;40270	39980	40267	Service_Sonenberg_150119_3
P28667	22	P28667	P28667	MARCKS-related protein	Marcksl1		0.981214	17.3337	2.33936e-06	42.355	33.965	42.355	1	S	KAPRGDVTAEEAAGASPAKANGQENGHVRSN	X;X;X;X;X;X;X;X;X;X;X;X;X;X;X;Phospho (STY);X;X;X;X;X;X;X;X;Deamidation (NQ);X;X;X;X;X;X	XXXXPPPPPPPPPPPPPPPPPPPPPPPPPXX	GDVT(0.019)AEEAAGAS(0.981)PAKANGQENGHVR	GDVT(-17.33)AEEAAGAS(17.33)PAKANGQENGHVR	12	3	-4.3623	0	1630200	0	0	0	0	485230	1152400	0	0	0	0	0	740660	0	0	0	0	22	22	872	946	12166;12167;12168;12169	12693	12166	12693	Service_Sonenberg_150119_2
P28667	104	P28667	P28667	MARCKS-related protein	Marcksl1		0.999988	49.3105	0.00260946	76.1	45.413	76.1	1	S	KKKFSFKKPFKLSGLSFKRNRKEGGGDSSAS	X;X;X;X;X;X;X;X;X;X;X;X;X;X;X;Phospho (STY);X;X;X;X;X;X;X;X;X;X;X;X;X;X;X	XXXXXXXXXXXPPPPPPPPXXXXXXXXXXXX	LSGLS(1)FKR	LS(-49.31)GLS(49.31)FKR	5	2	0.32313	0	308700	0	38766	0	0	860620	0	294170	343220	0	0	0	94543	0	0	0	708720	104	104	1656	1799	23503;23504;23505;23506;23507;23508;23509	23701;23702;23703;23704;23705;23706;23707	23503	23702	Service_Sonenberg_150119_7
P29351	10	P29351	P29351	Tyrosine-protein phosphatase non-receptor type 6	Ptpn6		0.999504	33.0427	0.00132094	51.268	31.491	51.268	1	S	______MVRWFHRDLSGPDAETLLKGRGVPG	X;X;X;X;X;X;X;X;X;X;X;X;X;X;X;Phospho (STY);X;X;X;X;X;X;X;X;X;X;X;X;X;X;X	XXXXXXXXXXXXXPPPPPPPPPPPPXXXXXX	DLS(1)GPDAETLLK	DLS(33.04)GPDAET(-33.04)LLK	3	2	0.36803	978060	360900	902940	579760	466720	569850	0	0	487690	0	0	368470	581170	0	0	501980	0	0	10	10	465	511	6638;6639;6640;6641;6642;6643;6644;6645;6646;6647	7667	6638	7667	Service_Sonenberg_150119_13
P29351	556	P29351	P29351	Tyrosine-protein phosphatase non-receptor type 6	Ptpn6		0.354585	0	1.55518e-11	83.966	83.966	83.966		S	YPPAVRSAHAKASRTSSKHKEEVYENVHSKS	X;X;X;X;X;X;X;X;X;X;X;X;X;X;X;X;X;X;X;X;X;X;X;X;X;X;X;X;X;X;X	XXXXXXXXXXXXXXXXXXXXXXXXXXXXXXX	T(0.355)S(0.355)S(0.291)KHKEEVYENVHSK	T(0)S(0)S(-0.86)KHKEEVY(-58.41)ENVHS(-76.87)K	2	3	0.088296	0	0	0	0	0	0	0	0	0	0	0	0	0	0	0	0	0	0	556	556	3204	3523			46393	47123	Service_Sonenberg_150119_2
P29352	687	P29352	P29352	Tyrosine-protein phosphatase non-receptor type 22	Ptpn22		0.998901	29.5843	1.14089e-07	56.708	46.074	54.668	1	S	NVKLRSPKSDRHQDGSPPPPLPERTLESFFL	X;X;X;X;X;X;X;X;X;X;X;X;X;X;X;Phospho (STY);X;X;X;X;X;X;X;X;X;X;X;X;X;X;X	XXXXXXXXPPPPPPPPPPPPPPPPXXXXXXX	S(0.001)DRHQDGS(0.999)PPPPLPER	S(-29.58)DRHQDGS(29.58)PPPPLPER	8	3	-0.27291	0	0	1213000	0	957060	1317100	1675500	0	0	959850	0	0	0	0	0	0	0	0	687	687	2426	2669	34978;34979;34980;34981;34982	34934;34935;34936	34978	34935	Service_Sonenberg_150119_3
P30204	22	P30204	P30204	Macrophage scavenger receptor types I and II	Msr1		0.464364	0	1.87137e-05	40.404	32.216	40.404		S	ENQRLCPHEQEDADCSSESVKFDARSMTASL	X;X;X;X;X;X;X;X;X;X;X;X;X;X;X;Phospho (STY);X;X;X;X;X;X;X;X;X;Phospho (STY);Oxidation (M);Phospho (STY);X;Phospho (STY);X	XXXXPPPPPPPPPPPPPPPPPPPPPXXXXXX	LCPHEQEDADCS(0.464)S(0.464)ES(0.071)VKFDAR	LCPHEQEDADCS(0)S(0)ES(-8.14)VKFDAR	12	4	-1.4212	0	0	0	0	0	0	0	0	0	0	0	0	0	0	0	0	0	0	22	22	1537;1538	1671;1672			21970	22386	Service_Sonenberg_150119_8
P30204	23	P30204	P30204	Macrophage scavenger receptor types I and II	Msr1		0.639916	3.98813	1.87137e-05	40.645	32.841	40.645	1	S	NQRLCPHEQEDADCSSESVKFDARSMTASLP	X;X;X;X;X;X;X;X;X;X;X;X;X;X;X;Phospho (STY);X;X;X;X;X;X;X;X;Phospho (STY);Oxidation (M);Phospho (STY);X;Phospho (STY);X;X	XXXPPPPPPPPPPPPPPPPPXXXXXXXXXXX	LCPHEQEDADCS(0.255)S(0.64)ES(0.105)VK	LCPHEQEDADCS(-3.99)S(3.99)ES(-7.86)VK	13	3	-0.41056	0	0	0	0	0	0	6116100	0	0	0	6928300	0	0	5737700	0	2963300	6732900	0	23	23	1537;1538	1671;1672	21965;21966;21967;21968;21969	22385	21965	22385	Service_Sonenberg_150119_7
P30204	32	P30204	P30204	Macrophage scavenger receptor types I and II	Msr1		0.986151	18.6008	1.59851e-12	103.43	95.396	68.893	1;2	S	EDADCSSESVKFDARSMTASLPHSTKNGPSL	X;X;X;X;X;Phospho (STY);Phospho (STY);X;X;X;X;X;X;X;X;Phospho (STY);Oxidation (M);X;X;Phospho (STY);X;X;X;X;X;X;X;X;X;X;X	XXXXXXXXXXXXXXXPPPPPPPPPPPXXXXX	S(0.986)MT(0.014)ASLPHSTK	S(18.6)MT(-18.6)AS(-36.27)LPHS(-55.18)T(-55.18)K	1	2	-0.491	10075000	4095200	6821400	6959600	9784800	10918000	3598100	6484200	7444700	14776000	0	4072400	3106600	2733500	5501200	0	3905400	8140500	32	32	2680	2950;2951;2952	38515;38517;38518;38519;38520;38521;38522;38523;38524;38525;38526;38527;38528;38529;38530;38531;38532;38533;38534;38535;38536;38537;38539;38540;38541;38542;38543;38546;38548;38550;38552;38555;38556;38564;38565;38567;38569;38572;38573;38575;38576;38577	38746;38747;38751;38752;38753;38754;38755;38756;38757;38758;38759;38760;38761;38762;38763;38764;38765;38766;38767;38768;38769;38770;38771;38772;38773;38774;38775;38776;38777;38778;38779;38780;38781;38782;38783;38784;38785;38786;38787;38788;38789;38790;38792;38793;38798;38799;38800;38801;38802;38803;38805;38806;38809;38810;38811;38812;38814;38815;38816;38820;38821;38822;38823;38833;38834;38837;388…	38521	38758	Service_Sonenberg_150119_7
P30204	36	P30204	P30204	Macrophage scavenger receptor types I and II	Msr1		0.998768	29.9204	0.000589789	72.705	62.924	72.705	2	S	CSSESVKFDARSMTASLPHSTKNGPSLQEKL	X;Phospho (STY);Phospho (STY);X;X;X;X;X;X;X;X;Phospho (STY);X;Phospho (STY);X;Phospho (STY);X;X;X;X;X;X;X;X;X;X;X;X;X;X;X	XXXXXXXXXXXPPPPPPPPPPPXXXXXXXXX	S(0.658)MT(0.342)AS(0.999)LPHS(0.001)TK	S(2.84)MT(-2.84)AS(29.92)LPHS(-29.92)T(-37.59)K	5	2	-0.63424	6006400	4095200	3574900	4211900	5557400	5286700	0	2981500	4566600	10504000	0	4072400	5927100	0	0	0	0	5409800	36	36	2680	2950;2951;2952	38530;38531;38532;38533;38534;38535;38536;38537;38538;38539;38540;38541;38542;38543	38777;38778;38779;38780;38781;38782;38783;38784;38785;38786;38787;38788;38789;38790;38791;38792;38793	38535	38785	Service_Sonenberg_150119_6
P30355	41	P30355	P30355	Arachidonate 5-lipoxygenase-activating protein	Alox5ap		1	43.6798	0.038721	43.68	33.628	43.68	1	S	FAHKVEHESKAHNGRSFQRTGTLAFERVYTA	X;X;X;X;X;X;X;X;X;X;X;X;Deamidation (NQ);X;X;Phospho (STY);X;X;X;X;X;X;X;X;X;X;X;X;X;X;X	XXXXXXXXXXPPPPPPPPPXXXXXXXXXXXX	AHNGRS(1)FQR	AHNGRS(43.68)FQR	6	3	0.52513	0	331650	0	0	0	707520	6385000	484170	183200	4132800	0	0	0	0	0	0	0	0	41	41	114	120	1621;1622;1623;1624;1625;1626	1763	1621	1763	Service_Sonenberg_150119_7
P30415	255	P30415	P30415	NK-tumor recognition protein;Putative peptidyl-prolyl cis-trans isomerase	Nktr		0.960965	13.9329	0.000910875	53.237	33.579	53.237	1	S	KEMSSSEEPRRKRTVSPEGYSERSDVNEKRS	X;X;X;X;X;X;X;X;X;X;X;X;X;X;X;Phospho (STY);X;X;X;X;X;X;X;X;X;X;X;X;X;X;X	XXXXXXXXXXXXXPPPPPPPPPPXXXXXXXX	T(0.039)VS(0.961)PEGYSER	T(-13.93)VS(13.93)PEGY(-41.19)S(-39.43)ER	3	2	0.90461	0	0	0	0	0	0	549760	357240	0	392640	0	0	0	0	0	391570	698780	0	255	255	3246	3569	47021;47022;47023;47024;47025;47026;47027	47654;47655;47656	47022	47655	Service_Sonenberg_150119_14
P30993	325	P30993	P30993	C5a anaphylatoxin chemotactic receptor 1	C5ar1		0.999721	35.5805	0.000308057	74.649	56.445	74.649	1	S	GRLLRSLPSIIRNALSEDSVGRDSKTFTPST	X;X;X;X;X;X;X;X;X;X;X;X;X;X;X;Phospho (STY);X;X;X;X;X;X;X;X;X;X;X;X;X;X;X	XXXXXXXXXXXXPPPPPPPPPPPPPXXXXXX	NALS(1)EDSVGRDSK	NALS(35.58)EDS(-35.58)VGRDS(-56.31)K	4	2	0.67121	630200	1173600	0	0	0	829140	859710	633710	794870	597420	771940	502960	405300	533900	0	613660	828770	0	325	325	1752	1915	24700;24734;24739;24742;24744;24747;24749;24752;24755;24757;24760;24763;24766	24531	24700	24531	Service_Sonenberg_150119_2
P30993	328	P30993	P30993	C5a anaphylatoxin chemotactic receptor 1	C5ar1		0.999129	30.5986	2.43058e-22	130.1	97.01	130.1	1	S	LRSLPSIIRNALSEDSVGRDSKTFTPSTTDT	X;X;X;X;X;X;X;X;X;X;X;X;X;X;X;Phospho (STY);X;X;X;X;X;X;X;X;X;X;X;X;Phospho (STY);X;Phospho (STY)	XXXXXXXXXPPPPPPPPPPPPPXXXXXXXXX	NALSEDS(0.999)VGRDS(0.001)K	NALS(-60.01)EDS(30.6)VGRDS(-30.6)K	7	2	0.69914	11414000	14371000	9909900	7037400	8354000	11593000	16144000	11915000	17792000	16711000	14626000	10011000	12919000	10453000	9306900	9977900	16233000	8259800	328	328	1752	1915	24695;24696;24698;24699;24701;24702;24703;24704;24705;24707;24708;24709;24710;24711;24712;24714;24715;24716;24717;24719;24720;24721;24722;24723;24725;24726;24727;24728;24729;24730;24731;24732;24733;24735;24736;24738;24740;24741;24743;24745;24746;24748;24750;24751;24753;24754;24756;24758;24759;24761;24762;24764;24765;24767;24768	24520;24521;24522;24524;24525;24526;24527;24528;24529;24530;24532;24533;24534;24535;24536;24537;24538;24539;24541;24542;24543;24544;24545;24546;24547;24548;24549;24550;24551;24553;24554;24555;24556;24557;24558;24559;24560;24562;24563;24564;24565;24566;24567;24568;24569;24570;24571;24573;24574;24575;24576;24577;24578;24579;24580;24581;24582;24583;24584;24585;24586;24587;24588;24589;24590	24711	24549	Service_Sonenberg_150119_8
P30993	333	P30993	P30993	C5a anaphylatoxin chemotactic receptor 1	C5ar1		0.97125	15.3006	0.000300358	62.162	45.22	56.527	1	S	SIIRNALSEDSVGRDSKTFTPSTTDTSTRKS	X;X;X;X;X;X;X;X;X;X;X;X;X;X;X;Phospho (STY);X;X;X;X;X;X;X;Phospho (STY);X;Phospho (STY);Phospho (STY);Phospho (STY);X;X;X	XXXXPPPPPPPPPPPPPXXXXXXXXXXXXXX	NALSEDS(0.029)VGRDS(0.971)K	NALS(-40.3)EDS(-15.3)VGRDS(15.3)K	12	2	-0.94743	4207500	0	0	2946500	2165000	0	0	2127500	0	3379100	0	0	2748200	0	0	0	0	0	333	333	1752	1915	24697;24706;24713;24718;24724;24737	24523;24540;24552;24561;24572	24713	24552	Service_Sonenberg_150119_8
P30993	344	P30993	P30993	C5a anaphylatoxin chemotactic receptor 1	C5ar1		0.718669	7.08995	2.90271e-06	95.183	78.241	60.918	1	S	VGRDSKTFTPSTTDTSTRKSQAV________	X;X;X;X;Phospho (STY);X;X;X;X;X;X;X;X;X;X;Phospho (STY);X;X;X;X;X;X;X;X;X;X;X;X;X;X;X	XXXXXXPPPPPPPPPPPPPXXXXXXXXXXXX	TFTPSTTDT(0.14)S(0.719)T(0.14)RK	T(-56.49)FT(-52.32)PS(-50.75)T(-44.42)T(-32.71)DT(-7.09)S(7.09)T(-7.09)RK	10	3	0.38238	0	1275200	589470	0	0	1696400	6577900	2959100	0	0	7530500	3692400	0	5048300	0	3331500	0	0	344	344	3070;3071	3377;3378	44426;44428;44429;44433;44438;44440;44441;44442;44444;44445;44446;44448;44449;44450;44451;44452;44453;44455;44456	45376;45377;45380;45381;45386;45392	44429	45381	Service_Sonenberg_150119_8
P30999	899	P30999	P30999	Catenin delta-1	Ctnnd1		0.995568	25.2958	0.00257793	42.209	29.332	42.209		S	DREEIPMSNMGSNTKSLDNNYSTLNERGDHN	X;X;X;X;X;X;X;X;X;X;X;X;X;X;X;Phospho (STY);X;X;X;X;X;X;X;X;X;X;X;X;X;X;X	XXXXXXXXXXXXXXXPPPPPPPPPPPPXXXX	S(0.996)LDNNY(0.003)S(0.001)TLNER	S(25.3)LDNNY(-25.3)S(-29.59)T(-33.98)LNER	1	2	-0.18168	0	0	0	392330	366070	0	0	0	0	569110	585000	327020	0	0	0	593040	483940	0	899	899	2630	2895	37769;37770;37771;37772;37773;37774;37775	37887	37769	37887	Service_Sonenberg_150119_10
P30999	268	P30999	P30999	Catenin delta-1	Ctnnd1		0.965128	14.4211	0.00123087	81.017	52.504	81.017	1	S	RQDVYGPQPQVRVGGSSVDLHRFHPEPYGLE	X;X;X;X;X;X;X;X;X;X;X;X;X;X;X;Phospho (STY);X;X;X;X;X;X;X;X;X;X;X;X;X;X;X	XXXXXXXXXXXXPPPPPPPPPPXXXXXXXXX	VGGS(0.965)S(0.035)VDLHR	VGGS(14.42)S(-14.42)VDLHR	4	2	-0.69823	5030200	1944800	0	0	0	2903000	6406300	1578900	2581200	3071400	4972800	4811800	3729100	4515600	6319000	0	4660000	2759300	268	268	3296	3626	47753;47754;47755;47756;47757;47758;47759;47760;47761;47762;47763;47764;47765;47766	48362;48363;48364	47753	48363	Service_Sonenberg_150119_14
P31324	112	P31324	P31324	cAMP-dependent protein kinase type II-beta regulatory subunit	Prkar2b		0.999969	45.0316	3.94045e-36	103.14	93.422	103.14	1	S	GAFNAPVINRFTRRASVCAEAYNPDEEEDDA	X;X;X;X;X;X;X;X;X;X;X;X;X;X;X;Phospho (STY);X;X;X;X;X;X;X;X;X;X;X;X;X;X;X	XXXXXXXXXXXXXPPPPPPPPPPPPPPPPPP	RAS(1)VCAEAYNPDEEEDDAESR	RAS(45.03)VCAEAY(-45.03)NPDEEEDDAES(-101.51)R	3	3	0.24463	10862000	12532000	0	0	0	0	13786000	0	6290500	0	5479900	0	3075900	0	0	3581700	0	0	112	112	2052	2257	29162;29163;29164;29165;29166;29167;29168	28556;28557;28558;28559	29163	28558	Service_Sonenberg_150119_2
P31786	2	P31786	P31786	Acyl-CoA-binding protein	Dbi		1	47.9161	1.08187e-05	59.502	54.519	47.916	1	S	______________MSQAEFDKAAEEVKRLK	X;X;X;X;X;X;X;X;X;X;X;X;X;X;X;Phospho (STY);X;X;X;X;X;X;X;X;X;X;X;X;X;X;X	XXXXXXXXXXXXXXXPPPPPPPPPPPPPPXX	S(1)QAEFDKAAEEVKR	S(47.92)QAEFDKAAEEVKR	1	3	0.48195	638620	424750	0	0	244300	274310	205910	492790	0	281220	93925	210640	165010	96181	268330	192200	275100	358010	2	2	2735	3009	39326;39327;39328;39329;39330;39331;39332;39333;39334;39335;39336;39337;39338;39339;39340	39626;39627;39628	39327	39628	Service_Sonenberg_150119_10
P31996	118	P31996	P31996	Macrosialin	Cd68		0.936632	11.8536	0.000108292	46.249	35.91	46.249	1	S	PRSSTVGPHPGPPPPSPSPRSKGALGNYTWA	X;X;X;X;X;X;X;X;X;X;X;X;X;X;X;Phospho (STY);X;X;X;X;X;X;X;X;X;X;X;X;X;X;X	XXPPPPPPPPPPPPPPPPPPXXXXXXXXXXX	S(0.001)S(0.001)T(0.001)VGPHPGPPPPS(0.937)PS(0.061)PR	S(-30.98)S(-30.98)T(-30.98)VGPHPGPPPPS(11.85)PS(-11.85)PR	14	2	0.39612	0	0	0	0	0	0	452950	0	0	613740	464410	515020	428510	675140	509720	0	0	678590	118	118	2927	3221	42312;42313;42314;42315;42316;42317;42318;42319;42320	43039;43040	42313	43040	Service_Sonenberg_150119_18
P33215	379	P33215	P33215	Protein NEDD1	Nedd1		0.825719	7.54166	0.0106599	51.841	35.876	51.841	1	S	GSGAAQDEAGLARSKSTDIFSKETDAGKSQD	X;X;X;X;X;X;X;X;X;X;X;X;X;X;X;Phospho (STY);X;X;X;X;X;X;X;X;X;X;X;X;X;X;X	XXXXXXXXXXXXXPPPPPPPPPXXXXXXXXX	S(0.145)KS(0.826)T(0.028)DIFS(0.001)K	S(-7.54)KS(7.54)T(-14.66)DIFS(-31.28)K	3	2	-0.022497	291790	177240	0	900600	1405400	810650	0	0	0	1759800	941430	1187500	187330	0	0	912750	1310800	1111000	379	379	2622	2887	37677;37678;37679;37680;37681;37682;37683;37684;37685;37686;37687;37688	37815;37816;37817	37678	37816	Service_Sonenberg_150119_10
P61294;P35279	2;2	P61294	P61294	Ras-related protein Rab-6B;Ras-related protein Rab-6A	Rab6b;Rab6a		1	68.5357	0.000241204	68.536	58.948	68.536	1	S	______________MSAGGDFGNPLRKFKLV	X;X;X;X;X;X;X;X;X;X;X;X;X;X;X;Phospho (STY);X;X;X;X;X;X;X;X;X;X;X;X;X;X;X	XXXXXXXXXXXXXXXPPPPPPPPPPPXXXXX	S(1)AGGDFGNPLR	S(68.54)AGGDFGNPLR	1	2	1.2064	0	0	211720	0	0	0	136260	0	0	0	0	0	0	0	0	0	0	0	2	2	2373	2603	34000;34001	33505	34000	33505	Service_Sonenberg_150119_3
P35283	20	P35283	P35283	Ras-related protein Rab-12	Rab12		0.994429	23.9011	8.48041e-05	46.656	36.317	46.656	1	S	AALHRRPAGGSLGAVSPALSGGQARRRKQPP	X;X;X;X;X;X;X;X;X;X;X;X;X;X;X;Phospho (STY);X;X;X;X;X;X;X;X;X;X;X;X;X;X;X	XXXXXPPPPPPPPPPPPPPPPPPPPXXXXXX	RPAGGS(0.004)LGAVS(0.994)PALS(0.002)GGQAR	RPAGGS(-23.9)LGAVS(23.9)PALS(-28.15)GGQAR	11	3	0.21325	0	1435100	0	0	0	0	0	0	0	0	0	0	0	0	0	0	0	0	20	20	2211	2432	31470	30976	31470	30976	Service_Sonenberg_150119_2
P35383	329	P35383	P35383	P2Y purinoceptor 2	P2ry2		0.983778	17.9638	1.39253e-06	78.326	58.219	47.088	1	S	VRFARDAKPPTEPTPSPQARRKLGLHRPNRT	X;X;X;X;X;X;X;X;X;X;X;X;X;X;X;Phospho (STY);X;X;X;X;X;X;X;X;X;X;X;X;X;X;X	XXXXXPPPPPPPPPPPPPPPXXXXXXXXXXX	DAKPPTEPT(0.016)PS(0.984)PQAR	DAKPPT(-32.94)EPT(-17.96)PS(17.96)PQAR	11	3	0.22704	2239100	765470	2085200	1923000	0	1267100	3041000	0	2006300	2079400	0	1686800	3731700	3023200	2868200	2392900	3081300	1486400	329	329	391	428	5680;5681;5682;5683;5684;5685;5687;5688;5689;5690;5691;5692;5693;5694;5695;5696	6972;6973;6974;6975;6976;6977;6978;6981;6982;6983;6984;6985;6986;6987;6988;6989;6990;6991;6992	5687	6981	Service_Sonenberg_150119_9
P35486	232	P35486	P35486	Pyruvate dehydrogenase E1 component subunit alpha, somatic form, mitochondrial	Pdha1		0.980567	17.0295	0.00110667	98.04	77.485	92.538	1	S	PCIFICENNRYGMGTSVERAAASTDYYKRGD	X;X;X;X;X;X;X;X;X;X;X;X;Oxidation (M);X;X;Phospho (STY);X;X;X;X;X;X;X;X;X;X;X;X;X;X;X	XXXXXXXXXXPPPPPPPPPXXXXXXXXXXXX	YGMGT(0.019)S(0.981)VER	Y(-69.8)GMGT(-17.03)S(17.03)VER	6	2	0.45529	2785000	1547900	3985000	3359300	4787100	3503100	11992000	2987800	5443500	7689000	4047900	1277000	0	3272700	1088000	1345500	6204700	6360200	232	232	3441	3780;3781	49498;49499;49500;49501;49502;49503;49504;49505;49506;49507;49508;49509;49510;49511;49512;49513;49514;49515;49516;49517;49518;49519;49520;49521;49522;49523;49524;49525;49526;49527	49633;49634;49635;49636;49637;49638;49639;49640;49641;49642;49643;49644;49645;49646;49647;49648;49649;49650;49651;49652;49653;49654;49655;49656;49657;49658;49659;49660;49661;49662;49663;49664;49665;49666;49667;49668;49669	49503	49643	Service_Sonenberg_150119_7
P35486	293	P35486	P35486	Pyruvate dehydrogenase E1 component subunit alpha, somatic form, mitochondrial	Pdha1		0.977435	16.3735	1.99748e-05	77.527	68.573	72.496	1;2	S	GPILMELQTYRYHGHSMSDPGVSYRTREEIQ	X;X;X;X;X;X;X;X;X;X;X;X;X;X;X;Phospho (STY);Oxidation (M);X;X;X;X;X;Phospho (STY);X;X;X;X;X;X;X;X	XXXXXXXXXXXPPPPPPPPPPPPPPXXXXXX	YHGHS(0.977)MS(0.023)DPGVSYR	Y(-47.64)HGHS(16.37)MS(-16.37)DPGVS(-47.32)Y(-60.86)R	5	2	-0.64979	6835000	1424100	0	11272000	0	11727000	27539000	1280000	2259100	4091600	0	1787700	985150	0	1650800	2032800	3576600	12281000	293	293	3447	3787;3788;3789;3790	49572;49573;49574;49576;49577;49579;49580;49581;49582;49584;49585;49586;49587;49588;49589;49590;49591;49592;49593;49594;49595;49596;49597;49598;49599;49601;49602;49603;49604;49607;49609;49610;49611;49612;49613;49614;49615;49616;49617;49618;49619;49620;49621;49622	49685;49686;49687;49688;49690;49691;49693;49694;49695;49696;49697;49698;49700;49701;49702;49703;49704;49705;49706;49707;49709;49710;49711;49714;49715	49572	49685	Service_Sonenberg_150119_2
P35486	295	P35486	P35486	Pyruvate dehydrogenase E1 component subunit alpha, somatic form, mitochondrial	Pdha1		0.792663	6.18581	8.92058e-05	49.483	47.244	49.483	1;2	S	ILMELQTYRYHGHSMSDPGVSYRTREEIQEV	X;X;X;X;X;X;X;X;X;X;X;X;X;X;Oxidation (M);Phospho (STY);X;X;X;X;Phospho (STY);X;X;X;X;X;X;X;X;X;X	XXXXXXXXXPPPPPPPPPPPPPPXXXXXXXX	Y(0.008)HGHS(0.191)MS(0.793)DPGVS(0.008)YR	Y(-19.85)HGHS(-6.19)MS(6.19)DPGVS(-19.9)Y(-35.05)R	7	3	0.061513	12913000	10572000	0	0	0	0	0	0	16983000	0	0	9523000	0	0	0	0	46212000	0	295	295	3447	3787;3788;3789;3790	49570;49571;49575;49578;49583;49600;49606	49683;49684;49689;49692;49699;49708;49713	49583	49699	Service_Sonenberg_150119_12
P35486	300	P35486	P35486	Pyruvate dehydrogenase E1 component subunit alpha, somatic form, mitochondrial	Pdha1		0.999384	33.8949	2.19948e-05	68.044	59.09	48.314	2	S	QTYRYHGHSMSDPGVSYRTREEIQEVRSKSD	X;X;X;X;X;X;X;X;Phospho (STY);Oxidation (M);Phospho (STY);X;X;X;X;Phospho (STY);X;X;X;X;X;X;X;X;X;X;X;X;X;X;X	XXXXPPPPPPPPPPPPPPXXXXXXXXXXXXX	Y(0.005)HGHS(0.772)MS(0.223)DPGVS(0.999)YR	Y(-22.17)HGHS(5.4)MS(-5.4)DPGVS(33.89)Y(-38.15)R	12	3	-1.0006	6835000	0	0	9402100	0	10351000	22045000	0	0	0	0	0	0	0	0	433110	0	10128000	300	300	3447	3787;3788;3789;3790	49594;49595;49596;49597;49598;49599;49600;49601;49602;49603;49618;49619;49620;49621;49622	49702;49703;49704;49705;49706;49707;49708;49709;49710;49714;49715	49599	49707	Service_Sonenberg_150119_10
P35564	582	P35564	P35564	Calnexin	Canx		1	56.5991	1.16878e-10	107.17	84.633	56.599	1	S	EDSKPKAEEDEILNRSPRNRKPRRE______	X;X;X;X;X;X;X;X;X;X;X;X;X;Deamidation (NQ);X;Phospho (STY);X;X;X;X;X;X;X;X;X;X;X;X;X;X;X	XXXXXXPPPPPPPPPPPPXXXXXXXXXXXXX	AEEDEILNRS(1)PR	AEEDEILNRS(56.6)PR	10	3	-0.7424	2416200	1748900	2518500	1673800	2212100	2519800	3362000	1142700	2063800	2379900	1661200	1506300	1858500	1582700	2247300	2011800	3315300	2417400	582	582	60	64;65	778;779;780;781;782;783;784;785;786;787;788;789;790;791;792;793;794;795;796;797;798;799;800;801;802;803;804;805;806;807;808;809;810;811;812;813;814;815;816;817;818;819;820;821;822;823;824;825;826;827;828;829;830;831;832;833;834;835;836;837;838;839;840	839;840;841;842;843;844;845;846;847;848;849;850;851;852;853;854;855;856;857;858;859;860;861;862;863;864;865;866;867;868;869;870;871;872;873;874;875;876;877;878;879;880;881;882;883;884;885;886;887;888;889;890;891;892;893	810	893	Service_Sonenberg_150119_17
P35564	553	P35564	P35564	Calnexin	Canx		0.985934	19.0786	1.94635e-16	64.845	57.399	63.184	1;2	S	RDEEEEEEKLEEKQKSDAEEDGVTGSQDEED	X;X;X;X;X;X;X;X;X;X;X;X;X;X;X;Phospho (STY);X;X;X;X;X;X;X;X;X;Phospho (STY);X;X;X;X;X	XXXXXXXXXXXXXPPPPPPPPPPPPPPPPPP	QKS(0.986)DAEEDGVT(0.012)GS(0.002)QDEEDSKPK	QKS(19.08)DAEEDGVT(-19.08)GS(-27.21)QDEEDS(-56.2)KPK	3	3	-0.34004	11775000	2182900	3703800	0	0	5197900	36380000	5936100	14212000	9757000	8486100	0	10200000	0	0	0	0	3527400	553	553	1968	2165;2166	28043;28045;28047;28048;28050;28053;28056;28058;28061;28063;28066;28069;28080;28081	27586;27588;27589;27590;27592;27593;27594;27595;27596;27598;27599;27603;27608;27610;27613;27614;27616;27619;27623;27624;27625;27626;27627;27628	28053	27603	Service_Sonenberg_150119_7
P35564	563	P35564	P35564	Calnexin	Canx		0.990272	22.9043	8.01118e-21	71.678	64.231	71.678	1;2	S	EEKQKSDAEEDGVTGSQDEEDSKPKAEEDEI	X;X;X;X;X;Phospho (STY);X;X;X;X;X;X;X;X;X;Phospho (STY);X;X;X;X;X;X;X;X;X;X;X;X;X;X;X	XXXPPPPPPPPPPPPPPPPPPPPPPXXXXXX	QKS(0.001)DAEEDGVT(0.004)GS(0.99)QDEEDS(0.005)KPK	QKS(-32.22)DAEEDGVT(-23.87)GS(22.9)QDEEDS(-22.9)KPK	13	3	-0.29583	3034800	537030	2388300	0	0	1184300	20805000	568570	8145400	2140200	2056700	0	0	3895200	2374800	591350	0	867120	563	563	1968	2165;2166	28042;28044;28046;28049;28051;28052;28054;28055;28057;28059;28060;28062;28064;28065;28067;28068;28070;28071;28072;28073;28074;28075;28076;28077;28078;28079;28080;28081	27585;27587;27591;27597;27600;27601;27602;27604;27605;27606;27607;27609;27611;27612;27615;27617;27618;27620;27621;27622;27626;27627;27628	28059	27611	Service_Sonenberg_150119_10
P35689	384	P35689	P35689	DNA repair protein complementing XP-G cells homolog	Ercc5		0.800329	6.04014	0.000598547	46.318	35.488	46.318		S	SKERNSGATADAGSISPRTCAAIQKALDDDN	X;X;X;X;X;X;X;X;X;X;X;X;X;X;X;Phospho (STY);X;X;X;X;X;X;X;X;X;X;X;X;X;X;X	XXXXPPPPPPPPPPPPPPXXXXXXXXXXXXX	NSGATADAGS(0.199)IS(0.8)PR	NS(-42.55)GAT(-32.57)ADAGS(-6.04)IS(6.04)PR	12	2	3.3578	0	0	0	0	0	0	2912400	0	0	0	0	0	0	0	0	0	0	0	384	384	1864	2049	26651	26424	26651	26424	Service_Sonenberg_150119_7
P35689	341	P35689	P35689	DNA repair protein complementing XP-G cells homolog	Ercc5		1	57.3663	7.84443e-07	73.928	62.315	57.366	1	S	HEKVKPEREPEAAPPSPRTLLAIQAAMLGSS	X;X;X;X;X;X;X;X;X;X;X;X;X;X;X;Phospho (STY);X;X;X;X;X;X;X;X;X;X;X;X;X;X;X	XXXPPPPPPPPPPPPPPPXXXXXXXXXXXXX	VKPEREPEAAPPS(1)PR	VKPEREPEAAPPS(57.37)PR	13	3	1.3397	0	2480100	3733800	0	13755000	4727200	0	3868400	0	6386900	0	0	0	0	3667400	0	5674100	3745300	341	341	3325	3657	48108;48109;48110;48111;48112;48113;48114;48115;48116	48617;48618;48619;48620;48621;48622;48623	48114	48623	Service_Sonenberg_150119_18
P35831	434	P35831	P35831	Tyrosine-protein phosphatase non-receptor type 12	Ptpn12		1	59.1529	0.00358379	59.153	12.763	59.153	1	S	ESAIEHIDKKLERNLSFEIKKVPLQEGPKSF	X;X;X;X;X;X;X;X;X;X;X;X;X;X;X;Phospho (STY);X;X;X;X;X;X;X;X;X;X;X;X;X;X;X	XXXXXXXXXXXXXPPPPPPPPXXXXXXXXXX	NLS(1)FEIKK	NLS(59.15)FEIKK	3	2	0.65266	3731800	3160800	3600700	1978600	2194300	2238600	1013300	1904400	1868400	1235800	1039400	1434800	1357000	635960	1145500	1661700	1346600	1920700	434	434	1826;1827	2004;2005	25997;25998;25999;26000;26001;26002;26003;26004;26005;26006;26007;26008;26009;26010;26011;26012;26013;26014;26015;26016;26017;26018;26019;26020;26021;26022;26023;26024;26025	25899;25900;25901;25902;25903;25904;25905;25906;25907;25908	26020	25908	Service_Sonenberg_150119_18
P35991	179	P35991	P35991	Tyrosine-protein kinase BTK	Btk		0.499999	0	0.00610986	75.695	54.794	75.695	1	S	GCQILENRNGSLKPGSSHRKTKKPLPPTPEE	X;X;X;X;X;X;X;X;Deamidation (NQ);X;X;X;X;X;X;Phospho (STY);X;X;X;X;X;X;X;X;X;X;X;X;X;X;X	XXXXXXXXPPPPPPPPPPPPXXXXXXXXXXX	NGSLKPGS(0.5)S(0.5)HR	NGS(-52.67)LKPGS(0)S(0)HR	8	2	0.029791	0	0	0	1196500	0	0	6323500	0	0	4708500	3059300	0	0	5981000	2255500	1894800	0	1212000	179	179	1792;1793	1966;1967	25507;25509;25510;25511;25512;25513;25514;25515;25516	25480;25481;25483;25484;25485	25507	25480	Service_Sonenberg_150119_7
P35991	180	P35991	P35991	Tyrosine-protein kinase BTK	Btk		0.947577	12.5714	0.00256298	78.964	58.974	78.964	1	S	CQILENRNGSLKPGSSHRKTKKPLPPTPEED	X;X;X;X;X;X;X;Deamidation (NQ);X;X;X;X;X;X;X;Phospho (STY);X;X;X;X;X;X;X;X;X;X;X;X;X;X;X	XXXXXXXPPPPPPPPPPPPXXXXXXXXXXXX	NGSLKPGS(0.052)S(0.948)HRK	NGS(-51.99)LKPGS(-12.57)S(12.57)HRK	9	2	-0.69246	2502100	1223500	0	0	0	713580	0	1136200	0	3423000	0	1134600	0	3294300	0	255770	1565200	1439500	180	180	1792;1793	1966;1967	25507;25508;25509;25510;25511;25512;25513;25514;25515;25516;25519;25521;25523;25525;25526;25527;25528;25529;25530;25531	25480;25481;25482;25483;25484;25485;25488;25489;25491;25493;25495	25519	25488	Service_Sonenberg_150119_8
P36916	51	P36916	P36916	Guanine nucleotide-binding protein-like 1	Gnl1		0.494551	0	1.40456e-13	69.979	60.696	69.979		S	SRSGSRERREEQTDTSDGESVTHHIRRLNQQ	X;X;X;X;X;X;X;X;X;X;X;X;X;X;X;X;X;X;X;X;X;X;X;X;X;X;X;X;X;X;X	XXXXXXXXXXXXXXXXXXXXXXXXXXXXXXX	REEQT(0.005)DT(0.495)S(0.495)DGES(0.005)VT(0.001)HHIR	REEQT(-19.8)DT(0)S(0)DGES(-19.8)VT(-29.6)HHIR	8	4	-0.77642	0	0	0	0	0	0	0	0	0	0	0	0	0	0	0	0	0	0	51	51	2072	2278			29463	28876	Service_Sonenberg_150119_11
P39053	774	P39053	P39053	Dynamin-1	Dnm1		0.999525	34.2879	0.00024081	79.795	71.575	79.795	2	S	DDSWLQVQSVPAGRRSPTSSPTPQRRAPAVP	X;X;X;X;X;X;X;X;X;X;X;X;X;X;X;Phospho (STY);X;X;Phospho (STY);Phospho (STY);X;X;X;X;X;X;X;X;X;X;X	XXXXXXXXXXXXXXPPPPPPPPPPPXXXXXX	RS(1)PT(0.006)S(0.165)S(0.819)PT(0.011)PQR	RS(34.29)PT(-21.99)S(-6.95)S(6.95)PT(-18.75)PQR	2	2	-0.31061	5877300	1407100	0	0	0	1168600	0	791460	2623500	2153700	1648000	1555200	1532900	2062300	2242900	0	2637300	1875600	774	774	2293	2518	32654;32655;32656;32657;32658;32659;32660;32661;32662;32663;32664;32665;32666;32667	32104;32105;32106;32107;32108;32109;32110;32111;32112;32113;32114;32115;32116	32659	32110	Service_Sonenberg_150119_12
P39053	777	P39053	P39053	Dynamin-1	Dnm1		0.673608	4.56557	0.000351005	67.456	53.104	67.456	2	S	WLQVQSVPAGRRSPTSSPTPQRRAPAVPPAR	X;X;X;X;X;X;X;X;X;X;X;X;Phospho (STY);X;X;Phospho (STY);X;X;X;X;X;X;X;X;X;X;X;X;X;X;X	XXXXXXXXXXXPPPPPPPPPPPXXXXXXXXX	RS(0.997)PT(0.092)S(0.674)S(0.237)PT(0.001)PQR	RS(25.77)PT(-8.78)S(4.57)S(-4.57)PT(-29.27)PQR	5	2	-0.5213	0	0	0	0	0	0	0	0	0	0	0	0	1532900	0	0	0	0	1875600	777	777	2293	2518	32661;32664	32112;32113;32116	32664	32116	Service_Sonenberg_150119_18
P39053	778	P39053	P39053	Dynamin-1	Dnm1		0.818571	6.94894	0.00024081	79.795	71.575	79.795	2	S	LQVQSVPAGRRSPTSSPTPQRRAPAVPPARP	X;X;X;X;X;X;X;X;X;X;X;Phospho (STY);X;X;X;Phospho (STY);X;X;X;X;X;X;X;X;X;X;X;X;X;X;X	XXXXXXXXXXPPPPPPPPPPPXXXXXXXXXX	RS(1)PT(0.006)S(0.165)S(0.819)PT(0.011)PQR	RS(34.29)PT(-21.99)S(-6.95)S(6.95)PT(-18.75)PQR	6	2	-0.31061	5877300	0	0	0	0	1168600	0	0	2623500	0	1648000	1555200	0	2062300	2242900	0	2637300	0	778	778	2293	2518	32656;32658;32659;32662;32663;32665;32666;32667	32106;32109;32110;32114;32115	32659	32110	Service_Sonenberg_150119_12
P40240	132	P40240	P40240	CD9 antigen	Cd9		1	54.5394	0.0143623	54.539	6.9804	54.539	1	S	KELQEFYKDTYQKLRSKDEPQRETLKAIHMA	X;X;X;X;X;X;X;X;X;X;X;X;X;X;X;Phospho (STY);X;X;X;X;X;X;X;X;X;X;X;X;X;X;X	XXXXXXXXXXXXXPPPPPPPPPXXXXXXXXX	LRS(1)KDEPQR	LRS(54.54)KDEPQR	3	2	-0.16318	0	0	0	0	0	0	0	0	0	0	9944000	0	0	0	0	0	0	0	132	132	1646	1789	23415	23653	23415	23653	Service_Sonenberg_150119_11
P41183	458	P41183	P41183	B-cell lymphoma 6 protein homolog	Bcl6		0.997844	26.6543	0.0206032	53.775	33.15	53.775	1	S	QASRLNNLVNRSLAGSPRSSSESHSPLYMHP	X;X;X;X;X;X;X;X;X;X;X;X;X;X;X;Phospho (STY);X;X;X;X;X;X;X;X;X;X;X;X;X;X;X	XXXXXXXXXXXPPPPPPPXXXXXXXXXXXXX	S(0.002)LAGS(0.998)PR	S(-26.65)LAGS(26.65)PR	5	2	-0.12013	2383700	0	0	1341300	0	1007400	2912700	0	0	2210300	2156000	1183500	0	0	1641700	1614300	1870800	841370	458	458	2626	2891	37727;37728;37729;37730;37731;37732;37733;37734;37735;37736;37737	37872;37873;37874;37875;37876;37877;37878	37731	37877	Service_Sonenberg_150119_11
P41251	6	P41251	P41251	Natural resistance-associated macrophage protein 1	Slc11a1		0.999856	38.4166	0.0010118	79.148	61.763	74.841	1	S	__________MISDKSPPRLSRPSYGSISSL	X;X;X;X;X;X;X;X;X;X;Oxidation (M);X;X;X;X;Phospho (STY);X;X;X;X;X;X;X;X;X;X;X;X;X;X;X	XXXXXXXXXXPPPPPPPPPXXXXXXXXXXXX	MISDKS(1)PPR	MIS(-38.42)DKS(38.42)PPR	6	2	-1.7664	3204200	1979200	2482400	2185900	2036000	2576000	3163000	2800900	2211300	4188100	1839300	2470700	2985000	2617300	2731700	2680500	2283100	2172600	6	6	1722	1879;1880	24339;24340;24341;24342;24343;24344;24345;24346;24347;24348;24349;24350;24351;24352;24353;24354;24355;24356;24357	24300;24301;24302;24303;24304;24305;24306;24307;24308;24309;24310;24311;24312;24313;24314;24315;24316;24317;24318;24319;24320;24321;24322;24323;24324;24325;24326;24327;24328;24329;24330;24331;24332;24333;24334;24335;24336;24337;24338;24339;24340;24341;24342	24339	24301	Service_Sonenberg_150119_1
P42128	87	P42128	P42128	Forkhead box protein K1	Foxk1		1	46.0223	0.00656266	46.022	26.66	46.022	1	S	TAPALVAAAAASVRQSPGPALARLEGREFEF	X;X;X;X;X;X;X;X;X;X;X;X;X;X;X;Phospho (STY);X;X;X;X;X;X;X;X;X;X;X;X;X;X;X	XXXXXXXXXXXXXXPPPPPPPPPXXXXXXXX	QS(1)PGPALAR	QS(46.02)PGPALAR	2	2	-0.61134	1481200	579820	0	0	0	0	1497700	683880	1350300	893440	1556900	942790	1446500	1288700	0	522900	1128700	862460	87	87	2011	2213	28588;28589;28590;28591;28592;28593;28594;28595;28596;28597;28598;28599;28600	28057	28588	28057	Service_Sonenberg_150119_1
P42208	218	P42208	P42208	Septin-2	2019-09-02		0.999989	51.3498	1.23219e-20	91.733	78.805	91.733	1	S	IEEHSIKIYHLPDAESDEDEDFKEQTRLLKA	X;X;X;X;X;X;X;X;X;X;X;X;X;X;X;Phospho (STY);X;X;X;X;X;X;X;X;X;X;X;X;X;X;X	XXXXXXXPPPPPPPPPPPPPPPPPPPPXXXX	IYHLPDAES(1)DEDEDFKEQTR	IY(-51.35)HLPDAES(51.35)DEDEDFKEQT(-54.52)R	9	3	-1.6147	31999000	49933000	28740000	0	0	0	189890	36146000	0	0	0	0	0	17767000	0	89754	225110	0	218	218	1274	1381	17763;17764;17765;17766;17767;17768;17769;17770;17771;17772;17773;17774;17775;17776;17777;17778	18009;18010;18011;18012;18013;18014;18015;18016;18017	17765	18012	Service_Sonenberg_150119_2
P42859	1841	P42859	P42859	Huntingtin	Htt		0.644104	2.68264	0.0357291	55.806	31.776	55.806		S	DHRWWAEVQQTPKRHSLSCTKSLNPQKSGEE	X;X;X;X;X;X;X;X;X;X;X;X;X;X;X;Phospho (STY);X;X;X;X;X;X;X;X;X;X;X;X;X;X;X	XXXXXXXXXXXXXPPPPPPPPXXXXXXXXXX	RHS(0.644)LS(0.347)CT(0.009)K	RHS(2.68)LS(-2.68)CT(-18.74)K	3	2	-1.4026	1026800	840590	0	0	0	0	0	453800	752290	919630	0	0	0	0	0	0	0	752730	1841	1841	1143;2125	1239;2337	30251;30252;30253;30254;30255;30256	29792	30251	29792	Service_Sonenberg_150119_9
P42859	1843	P42859	P42859	Huntingtin	Htt		0.932591	13.4976	0.0177754	59.597	18.715	46.39	1	S	RWWAEVQQTPKRHSLSCTKSLNPQKSGEEED	X;X;X;X;X;X;X;X;X;X;X;X;X;X;X;Phospho (STY);X;X;X;X;X;X;X;X;X;X;X;X;X;X;X	XXXXXXXXXXXXPPPPPPPXXXXXXXXXXXX	HS(0.042)LS(0.933)CT(0.026)K	HS(-13.5)LS(13.5)CT(-15.59)K	4	2	0.11162	2960800	1681900	993260	0	0	0	3632100	1199000	2729300	6486900	2966600	1993800	0	3963500	2494600	2657700	3106300	0	1843	1843	1143;2125	1239;2337	15849;15850;15851;15852;15853;15854;15855;15856;15857;15858;15859;15860;15861;15862	16298;16299;16300	15851	16300	Service_Sonenberg_150119_12
P43274	2	P43274	P43274	Histone H1.4	Hist1h1e		0.758854	4.97885	2.03156e-06	52.731	45.006	52.731	1	S	______________MSETAPAAPAAPAPAEK	X;X;X;X;X;X;X;X;X;X;X;X;X;X;X;Phospho (STY);X;X;X;X;X;X;X;X;X;X;X;X;X;X;X	XXXXXXXXXXXXXXXPPPPPPPPPPPPPPPP	S(0.759)ET(0.241)APAAPAAPAPAEKTPVK	S(4.98)ET(-4.98)APAAPAAPAPAEKT(-52.35)PVK	1	2	0.43907	3842400	0	3607700	0	0	0	0	0	1084500	0	0	0	0	0	0	0	0	0	2	2	2465;2466;2467	2708;2709;2710	35453;35454;35456;35459;35460;35461;35462;35464	35413;35414;35418;35419;35420;35421;35423	35460	35419	Service_Sonenberg_150119_18
P43276	2	P43276	P43276	Histone H1.5	Hist1h1b		0.889096	9.04232	1.20349e-09	68.944	52.69	63.037	1	S	______________MSETAPAETAAPAPVEK	X;X;X;X;X;X;X;X;X;X;X;X;X;X;X;Phospho (STY);X;X;X;X;X;X;X;X;X;X;X;X;X;X;X	XXXXXXXXXXXXXXXPPPPPPPPPPPPPPPP	S(0.889)ET(0.111)APAETAAPAPVEK	S(9.04)ET(-9.04)APAET(-41.79)AAPAPVEK	1	2	-0.085301	0	2315400	0	0	0	0	12480000	0	0	0	0	8846500	0	8414200	0	7696100	13831000	0	2	2	2471	2714	35495;35500;35504;35505;35506;35507	35439;35440;35449;35450;35459;35460;35461;35462;35463	35500	35450	Service_Sonenberg_150119_7
P43277	2	P43277	P43277	Histone H1.3	Hist1h1d		0.8609	7.91624	1.50104e-09	63.128	48.156	58.071	1	S	______________MSETAPAAPAAPAPVEK	X;X;X;X;X;X;X;X;X;X;X;X;X;X;X;Phospho (STY);X;X;X;X;X;X;X;X;X;X;X;X;X;X;X	XXXXXXXXXXXXXXXPPPPPPPPPPPPPPPP	S(0.861)ET(0.139)APAAPAAPAPVEK	S(7.92)ET(-7.92)APAAPAAPAPVEK	1	2	0.12071	7682800	1276100	0	0	0	2039600	5492600	0	3874400	3220900	2083800	3412800	7293200	2655100	2477100	0	0	3106000	2	2	2468;2469;2470	2711;2712;2713	35466;35469;35472;35475;35476;35477;35478;35479;35480;35481;35482;35483;35485	35425;35426;35427;35431;35432;35436	35469	35431	Service_Sonenberg_150119_13
P43346	11	P43346	P43346	Deoxycytidine kinase	Dck		0.997008	26.0884	4.94049e-12	106.58	85.518	64.534	1;2	S	_____MATPPKRFCPSPSTSSEGTRIKKISI	X;X;X;X;X;X;X;X;X;X;X;X;X;X;X;Phospho (STY);X;X;X;Phospho (STY);Phospho (STY);X;X;X;X;X;X;X;X;X;X	XXXXXXXXXXXPPPPPPPPPPPPPPXXXXXX	FCPS(0.997)PS(0.009)T(0.07)S(0.797)S(0.119)EGT(0.007)R	FCPS(26.09)PS(-20.74)T(-10.59)S(8.25)S(-8.25)EGT(-20.29)R	4	2	0.58359	34822000	30270000	23067000	18977000	29579000	22962000	35403000	27355000	48750000	33320000	26819000	26811000	33193000	38445000	26533000	24944000	34156000	19051000	11	11	793;2086	864;865;2293	11178;11179;11180;11181;11182;11183;11184;11185;11186;11187;11188;11189;11190;11191;11192;11193;11194;11195;11196;11197;11198;11199;11200;11201;11202;11203;11204;11205;11206;11207;11208;11209;11210;11211;11212;11213;11214;29699;29700;29701;29702;29703;29704;29705;29706;29708;29709;29710;29712;29713;29714;29715;29716;29717;29719;29720;29721;29722;29723;29724;29725	11862;11863;11864;11865;11866;11867;11868;11869;11870;11871;11872;11873;11874;11875;11876;11877;11878;11879;11880;11881;11882;11883;11884;11885;11886;11887;11888;11889;11890;11891;11892;11893;11894;11895;11896;11897;11898;11899;11900;11901;11902;11903;11904;11905;11906;11907;11908;11909;11910;11911;11912;11913;11914;11915;11916;11917;11918;11919;11920;11921;11922;11923;11924;11925;11926;11927;119…	11186	11870	Service_Sonenberg_150119_9
P43346	13	P43346	P43346	Deoxycytidine kinase	Dck		0.483635	3.55657	8.78459e-05	53.038	38.832	53.038		S	___MATPPKRFCPSPSTSSEGTRIKKISIEG	X;X;X;X;X;X;X;X;X;X;X;X;X;X;X;Phospho (STY);X;X;X;X;X;X;X;X;X;X;X;X;X;X;X	XXXXXXXXXPPPPPPPPPPPPPPXXXXXXXX	RFCPS(0.213)PS(0.484)T(0.174)S(0.064)S(0.064)EGT(0.001)R	RFCPS(-3.56)PS(3.56)T(-4.43)S(-8.79)S(-8.79)EGT(-26.81)R	7	2	-0.073371	0	0	0	0	0	0	0	0	0	0	0	0	0	0	0	0	0	0	13	13	793;2086	864;865;2293			29707	29171	Service_Sonenberg_150119_8
P43346	15	P43346	P43346	Deoxycytidine kinase	Dck		0.796717	8.24792	0.000100634	65.043	49.471	64.534	2	S	_MATPPKRFCPSPSTSSEGTRIKKISIEGNI	X;X;X;X;X;X;X;X;X;X;X;Phospho (STY);X;X;X;Phospho (STY);X;X;X;X;X;X;X;X;X;X;X;X;X;X;X	XXXXXXXXPPPPPPPPPPPPPXXXXXXXXXX	FCPS(0.997)PS(0.009)T(0.07)S(0.797)S(0.119)EGT(0.007)R	FCPS(26.09)PS(-20.74)T(-10.59)S(8.25)S(-8.25)EGT(-20.29)R	8	2	0.58359	2647500	1072200	1693200	0	3478200	2428500	0	1967000	2390400	2391300	2328200	0	0	2331300	0	0	4168500	0	15	15	793;2086	864;865;2293	11178;11179;11180;11181;11183;11185;11186;11187;11188;11190;11191;11192;11193;11194;11195;11196	11862;11863;11864;11865;11867;11869;11870;11871;11872;11874	11186	11870	Service_Sonenberg_150119_9
P43346	16	P43346	P43346	Deoxycytidine kinase	Dck		0.650797	3.31708	0.000374822	47.774	34.004	47.774	2	S	MATPPKRFCPSPSTSSEGTRIKKISIEGNIA	X;X;X;X;X;X;X;X;X;X;Phospho (STY);X;X;X;X;Phospho (STY);X;X;X;X;X;X;X;X;X;X;X;X;X;X;X	XXXXXXXPPPPPPPPPPPPPXXXXXXXXXXX	FCPS(0.99)PS(0.011)T(0.015)S(0.306)S(0.651)EGT(0.027)R	FCPS(22.45)PS(-21.79)T(-17.29)S(-3.32)S(3.32)EGT(-13.93)R	9	2	0.89928	0	0	0	0	0	1225700	0	0	0	0	0	0	4099400	0	0	0	0	0	16	16	793;2086	864;865;2293	11182;11189	11866;11873	11182	11866	Service_Sonenberg_150119_6
P46062	72	P46062	P46062	Signal-induced proliferation-associated protein 1	Sipa1		0.999764	36.9988	4.26056e-07	58.885	45.532	58.885	1;2	S	EVRPPTPASPRARAHSHEDASRPAATPTRLF	X;X;X;X;X;X;X;X;X;X;X;X;X;X;X;Phospho (STY);X;X;X;X;Phospho (STY);X;X;X;X;Phospho (STY);X;X;X;X;X	XXXXXXXXXXXXXPPPPPPPPPPPPPPPPXX	AHS(1)HEDASRPAATPTR	AHS(37)HEDAS(-37)RPAAT(-45.78)PT(-49.85)R	3	2	0.40905	15714000	1406200	0	20813000	0	2916900	21486000	7916600	12440000	28349000	6358400	11055000	0	17443000	341130	0	0	2686600	72	72	120	126;127	1685;1686;1687;1688;1689;1690;1691;1692;1693;1694;1695;1696;1697;1698;1699;1700;1701;1702;1703;1704;1705;1706;1707;1708;1709;1710	1815;1816;1817;1818;1819;1820;1821;1822;1823;1824;1825;1826;1827;1828	1688	1819	Service_Sonenberg_150119_7
P46062	77	P46062	P46062	Signal-induced proliferation-associated protein 1	Sipa1		0.572489	1.98381	0.000613025	43.12	34.76	43.12	2	S	TPASPRARAHSHEDASRPAATPTRLFTDPLA	X;X;X;X;X;X;X;X;X;X;Phospho (STY);X;X;X;X;Phospho (STY);X;X;X;X;X;X;X;X;X;X;X;X;X;X;X	XXXXXXXXPPPPPPPPPPPPPPPPXXXXXXX	AHS(1)HEDAS(0.572)RPAAT(0.363)PT(0.065)R	AHS(35.5)HEDAS(1.98)RPAAT(-1.98)PT(-9.44)R	8	3	-0.67586	0	0	0	0	0	2916900	0	0	0	5826500	0	0	0	0	0	0	0	2686600	77	77	120	126;127	1708;1709;1710	1828	1708	1828	Service_Sonenberg_150119_18
P46062	51	P46062	P46062	Signal-induced proliferation-associated protein 1	Sipa1		0.549257	0.858558	1.00554e-09	63.302	57.398	59.673	1	S	PNTFEPRPARGPLLRSGSDAGEVRPPTPASP	X;X;X;X;X;X;X;X;X;X;X;X;X;X;X;Phospho (STY);X;X;X;X;X;X;X;X;X;X;X;X;X;X;X	XXXXXXXXXXXXXXXPPPPPPPPPPPPPPPP	S(0.549)GS(0.451)DAGEVRPPTPASPR	S(0.86)GS(-0.86)DAGEVRPPT(-48.98)PAS(-53.07)PR	1	3	0.33382	0	970630	0	0	3269100	2652200	1576400	2297600	2693600	0	0	3523200	0	1142000	2147600	4080700	0	3410100	51	51	2530	2782	36352;36353;36356;36357;36360;36363;36364;36365;36366;36368;36369;36371;36373;36374	36425;36426;36427;36428;36433;36434;36439;36440;36441;36444;36445;36446;36447;36448;36449;36451;36452;36453	36360	36439	Service_Sonenberg_150119_12
P46062	53	P46062	P46062	Signal-induced proliferation-associated protein 1	Sipa1		0.910263	10.0673	1.71744e-10	64.52	58.136	47.75	1	S	TFEPRPARGPLLRSGSDAGEVRPPTPASPRA	X;X;X;X;X;X;X;X;X;X;X;X;X;X;X;Phospho (STY);X;X;X;X;X;X;X;X;X;X;X;X;X;X;X	XXXXXXXXXXXXXPPPPPPPPPPPPPPPPPX	S(0.09)GS(0.91)DAGEVRPPTPASPR	S(-10.07)GS(10.07)DAGEVRPPT(-40.47)PAS(-44.91)PR	3	3	0.25079	3780700	0	0	2267600	0	0	0	0	0	4349200	2919900	0	3080800	0	0	0	0	0	53	53	2530	2782	36350;36351;36355;36358;36359;36361;36367;36368;36370;36372	36422;36423;36424;36431;36432;36435;36436;36437;36438;36442;36450;36451;36452	36351	36424	Service_Sonenberg_150119_4
P46414	178	P46414	P46414	Cyclin-dependent kinase inhibitor 1B	Cdkn1b		0.830958	9.41127	1.71415e-06	40.682	32.878	40.682	1	S	QNKRANRTEENVSDGSPNAGTVEQTPKKPGL	X;X;X;X;X;X;X;X;X;X;X;X;X;X;X;Phospho (STY);X;X;X;X;X;X;X;X;X;X;X;X;X;X;X	XXXXPPPPPPPPPPPPPPPPPPPPPPPXXXX	ANRT(0.001)EENVS(0.07)DGS(0.831)PNAGT(0.095)VEQT(0.003)PK	ANRT(-30.17)EENVS(-10.76)DGS(9.41)PNAGT(-9.41)VEQT(-23.89)PK	12	3	-1.2631	1487200	0	0	0	0	0	1601900	1109800	0	1385700	1003200	913100	0	0	0	811200	0	1044000	178	178	196	214	2875;2876;2877;2878;2879;2880;2881;2882	2805	2875	2805	Service_Sonenberg_150119_1
P46414	10	P46414	P46414	Cyclin-dependent kinase inhibitor 1B	Cdkn1b		0.981601	17.277	0.000533046	89.805	47.456	85.813	1	S	______MSNVRVSNGSPSLERMDARQAEHPK	X;X;X;X;X;X;X;X;X;X;X;X;X;Deamidation (NQ);X;Phospho (STY);X;X;X;X;X;X;X;X;X;X;X;X;X;X;X	XXXXXXXXXXXPPPPPPPPPPXXXXXXXXXX	VSNGS(0.982)PS(0.018)LER	VS(-46.19)NGS(17.28)PS(-17.28)LER	5	2	0.38904	8185500	1593400	0	0	0	1522200	9341500	2265900	6110600	3952100	3206100	2528400	4483500	4439300	4301500	2637500	2609200	1517100	10	10	3384	3720	48896;48897;48898;48899;48900;48901;48902;48903;48904;48905;48906;48907;48908;48909;48910	49220;49221;49222;49223;49224;49225;49226;49227;49228;49229;49230;49231;49232;49233;49234;49235;49236	48897	49223	Service_Sonenberg_150119_7
P46467	92	P46467	P46467	Vacuolar protein sorting-associated protein 4B	Vps4b		0.494989	0	9.83164e-09	43.103	39.64	43.103		S	KKKEKKPQKPVKEEQSGPVDEKGNDSDGEAE	X;X;X;X;X;X;X;X;X;X;X;X;X;X;X;Phospho (STY);X;X;X;X;X;X;X;X;X;Phospho (STY);X;X;X;X;X	XXXXXXXXXXXXPPPPPPPPPPPPPPPPPPP	EEQS(0.495)GPVDEKGNDS(0.495)DGEAES(0.01)DDPEKK	EEQS(0)GPVDEKGNDS(0)DGEAES(-16.94)DDPEKK	4	3	-0.96784	0	0	0	0	0	0	0	0	0	0	0	0	0	0	0	0	0	0	92	92	602	656			8416	9249	Service_Sonenberg_150119_1
P46467	102	P46467	P46467	Vacuolar protein sorting-associated protein 4B	Vps4b		1	97.0908	2.41734e-71	151.11	144.09	128.74	1	S	VKEEQSGPVDEKGNDSDGEAESDDPEKKKLQ	X;X;X;X;X;X;X;X;X;X;X;X;X;X;X;Phospho (STY);X;X;X;X;X;X;X;X;X;X;X;X;X;X;X	XXPPPPPPPPPPPPPPPPPPPPPPPPPPPXX	GNDS(1)DGEAESDDPEKK	GNDS(97.09)DGEAES(-97.09)DDPEKK	4	2	0.27706	3210600	0	0	0	1224900	1041400	2957400	790940	1341200	3595300	0	1192400	2516400	1974900	2946100	0	2655900	1350700	102	102	602;958;959	656;1036;1037	8417;8418;8419;13237;13238;13239;13240;13241;13242;13243;13244;13245;13246;13247;13248;13249;13250;13251;13252;13253;13254;13255;13256;13257;13258;13259;13260;13261;13262	9251;9252;13671;13672;13673;13674;13675;13676;13677;13678;13679;13680;13681;13682;13683;13684;13685;13686;13687;13688;13689;13690;13691;13692;13693;13694;13695;13696;13697;13698	13244	13682	Service_Sonenberg_150119_12
P47713	437	P47713	P47713	Cytosolic phospholipase A2;Phospholipase A2;Lysophospholipase	Pla2g4a		0.99868	28.8958	6.8254e-85	151.04	140.43	146.3	1	S	ENITAKHIVSNDSSDSDDEAQGPKGTENEEA	X;X;X;X;X;X;X;X;X;X;X;X;X;X;X;Phospho (STY);X;X;X;X;X;X;X;X;X;X;X;X;X;X;X	XXXXXXPPPPPPPPPPPPPPPPPPXXXXXXX	HIVSNDSS(0.001)DS(0.999)DDEAQGPK	HIVS(-80.92)NDS(-44.91)S(-28.9)DS(28.9)DDEAQGPK	10	2	-0.091722	5153100	562450	0	2631000	2282700	2365600	5084200	1394000	2187000	3562000	4570600	2370900	4174400	4010000	3353800	0	4829200	0	437	437	1100	1189	15149;15150;15151;15152;15153;15154;15155;15156;15157;15158;15159;15160;15161;15162;15163	15614;15615;15616;15617;15618;15619;15620;15621;15622;15623;15624;15625;15626;15627;15628;15629;15630;15631;15632;15633;15634;15635;15636;15637;15638;15639;15640;15641	15153	15622	Service_Sonenberg_150119_6
P47753	9	P47753	P47753	F-actin-capping protein subunit alpha-1	Capza1		1	58.2461	1.0349e-05	58.246	48.876	58.246	1	S	_______MADFEDRVSDEEKVRIAAKFITHA	X;X;X;X;X;X;X;X;X;X;X;X;X;X;X;Phospho (STY);X;X;X;X;X;X;X;X;X;X;X;X;X;X;X	XXXXXXXXPPPPPPPPPPPPPPXXXXXXXXX	ADFEDRVS(1)DEEKVR	ADFEDRVS(58.25)DEEKVR	8	3	-0.15998	882330	877570	0	318290	430340	445510	418360	0	502730	593810	227780	246550	206370	151990	424860	287990	310260	0	9	9	37	39	440;441;442;443;444;445;446;447;448;449;450;451;452;453;454	464	440	464	Service_Sonenberg_150119_2
P47757	263	P47757	P47757	F-actin-capping protein subunit beta	Capzb		0.999976	46.1785	0.00246561	69.198	33.718	69.198	1	S	AIPDNHKFKQLQRELSQVLTQRQVYIQPDN_	X;X;X;X;X;X;X;X;X;X;X;X;X;X;X;Phospho (STY);X;X;X;X;X;X;X;X;X;X;X;X;X;X;X	XXXXXXXXXXXXXPPPPPPPPPXXXXXXXXX	ELS(1)QVLTQR	ELS(46.18)QVLT(-46.18)QR	3	2	-0.14135	619430	303270	676920	802540	1019600	681910	0	279840	306310	532340	219690	389340	132230	128050	192680	547260	770160	1036400	263	263	676	735	9466;9467;9468;9469;9470;9471;9472;9473;9474;9475;9476;9477;9478;9479;9480;9481;9482	10218;10219;10220;10221;10222;10223;10224	9466	10219	Service_Sonenberg_150119_4
P47809	78	P47809	P47809	Dual specificity mitogen-activated protein kinase kinase 4	Map2k4		0.95881	13.847	0.000938076	52.008	41.159	52.008	1	S	TTGVQNPHIERLRTHSIESSGKLKISPEQHW	X;X;X;X;X;X;X;X;X;X;X;X;X;X;X;Phospho (STY);X;X;X;X;X;X;X;X;X;X;X;X;X;X;X	XXXXXXXXXXXPPPPPPPPPPPXXXXXXXXX	LRT(0.04)HS(0.959)IES(0.002)SGK	LRT(-13.85)HS(13.85)IES(-27.92)S(-39.67)GK	5	3	-0.954	0	361230	0	0	0	852000	0	818780	2809300	3290900	1859200	0	0	0	0	0	1243300	2103600	78	78	1649	1792	23428;23429;23430;23431;23432;23433;23434;23435	23656;23657	23429	23657	Service_Sonenberg_150119_18
P47911	21	P47911	P47911	60S ribosomal protein L6	Rpl6		1	73.1818	1.26401e-12	85.813	73.766	85.813	1	S	APDTKEKKPAAKKAGSDAAASRPRAAKVAKK	X;X;X;X;X;X;X;X;X;X;X;X;X;X;X;Phospho (STY);X;X;X;X;X;X;X;X;X;X;X;X;X;X;X	XXXXXXXXXXXXPPPPPPPPPPPPXXXXXXX	AGS(1)DAAASRPR	AGS(73.18)DAAAS(-73.18)RPR	3	2	-0.22591	0	1236200	0	0	0	721510	2022200	995280	1986800	3436900	2655900	0	12559000	3255600	3875200	2265900	1370900	506130	21	21	98;1285	104;1394	1353;1354;1355;1356;1357;1358;1359;1360;1361;1362;1363;1364;1365;1366;1367;1368;17967;17968;17969;17970;17971;17972;17973;17974;17975;17976;17977;17978;17979;17980;17981;17982;17983;17984;17985;17986;17987;17988;17989;17990;17991;17992	1393;1394;1395;18279;18280;18281;18282;18283;18284;18285;18286;18287;18288;18289;18290;18291	1355	1395	Service_Sonenberg_150119_13
P48025	291	P48025	P48025	Tyrosine-protein kinase SYK	Syk		0.99927	32.3209	0.0053827	57.174	48.22	57.174	1	S	VTWSPGGIISRIKSYSFPKPGHKKPAPPQGS	X;X;X;X;X;X;X;X;X;X;X;X;X;X;X;Phospho (STY);X;X;X;X;X;X;X;X;X;X;X;X;X;X;X	XXXXXXXXXXXXXPPPPPPPPPPXXXXXXXX	S(0.001)YS(0.999)FPKPGHK	S(-32.32)Y(-38.39)S(32.32)FPKPGHK	3	2	-0.096769	1103600	546160	0	0	0	564810	1585300	1084800	0	1529000	568110	630870	0	900930	1554700	564190	1449700	1007500	291	291	3005	3304	43454;43455;43456;43457;43458;43459;43460;43461;43462;43463;43464;43465;43466	44236	43454	44236	Service_Sonenberg_150119_7
P48678	403	P48678	P48678	Prelamin-A/C;Lamin-A/C	Lmna		0.966717	14.656	1.55395e-31	115.56	104.8	102.08	1;2	S	RLSPSPTSQRSRGRASSHSSQSQGGGSVTKK	X;X;Phospho (STY);X;X;X;Phospho (STY);X;X;X;X;X;X;X;X;Phospho (STY);X;X;X;Phospho (STY);X;X;X;X;X;X;X;X;X;X;X	XXXXXXXXXXXXPPPPPPPPPPPPPPPPPPP	AS(0.967)S(0.033)HS(0.033)S(0.961)QS(0.006)QGGGSVTK	AS(14.66)S(-14.66)HS(-14.66)S(14.66)QS(-22.25)QGGGS(-57.09)VT(-69.76)K	2	2	0.16751	2103700	0	0	0	39979000	12201000	3508500	0	0	14540000	25225000	3247700	534160	0	0	24419000	4484300	0	403	403	281;282;983	311;312;313;314;1062;1063	4365;4369;4372;4373;4374;4375;4378;13482;13486;13488;13491;13494;13496;13506	5390;5391;5397;5401;5402;5403;5404;5405;5406;5410;5411;13835;13839;13841;13844;13848;13850	4374	5405	Service_Sonenberg_150119_12
P48678	404	P48678	P48678	Prelamin-A/C;Lamin-A/C	Lmna		0.974854	16.2221	4.3925e-174	179.07	155.35	76.85	1;2	S	LSPSPTSQRSRGRASSHSSQSQGGGSVTKKR	X;Phospho (STY);X;X;X;Phospho (STY);X;X;X;X;X;X;X;X;X;Phospho (STY);X;Phospho (STY);Phospho (STY);Deamidation (NQ);X;Deamidation (NQ);X;X;X;X;X;X;X;X;X	XXXXXXXXXXXPPPPPPPPPPPPPPPPPPPX	AS(0.023)S(0.975)HS(0.002)SQSQGGGSVTKK	AS(-16.22)S(16.22)HS(-27.8)S(-35.89)QS(-50.04)QGGGS(-61.93)VT(-66.69)KK	3	2	0.26412	966060	618900	819370	8757300	2901600	2257000	1325300	447620	1359800	5762300	5135900	0	1960100	2721400	246220	4354800	0	3973000	404	404	281;282;983	311;312;313;314;1062;1063	4350;4351;4352;4353;4356;4357;4358;4359;4363;4364;4366;4367;4368;4370;4371;4376;4377;4379;4380;4381;4382;4383;4384;4388;4389;4391;4393;4394;4395;4396;4398;4399;4400;13487;13489;13493;13495;13497;13502;13505;13507;13508;13510	5359;5360;5361;5362;5363;5364;5365;5366;5367;5372;5373;5374;5375;5376;5377;5378;5379;5385;5386;5387;5388;5389;5392;5393;5394;5395;5396;5398;5399;5400;5407;5408;5409;5412;5413;5414;5415;5416;5417;5418;5422;5423;5425;5427;5428;13840;13842;13846;13847;13849;13851;13856;13859;13860;13862	4383	5416	Service_Sonenberg_150119_3
P48678	406	P48678	P48678	Prelamin-A/C;Lamin-A/C	Lmna		0.719978	4.4454	3.91963e-14	72.438	62.013	47.242	1;2	S	PSPTSQRSRGRASSHSSQSQGGGSVTKKRKL	X;X;X;Phospho (STY);X;X;X;X;X;X;X;X;X;Phospho (STY);X;Phospho (STY);Phospho (STY);X;X;X;X;X;X;X;X;X;X;X;X;X;X	XXXXXXXXXPPPPPPPPPPPPPPPPPPXXXX	GRAS(0.055)S(0.117)HS(0.72)S(0.72)QS(0.374)QGGGS(0.012)VT(0.002)K	GRAS(-14.76)S(-10.61)HS(4.45)S(4.45)QS(-4.45)QGGGS(-21.26)VT(-30.77)K	7	2	-0.35441	9157900	0	0	2378100	0	0	1131400	0	1207000	0	1138400	0	0	1360500	0	0	2158000	21318000	406	406	281;282;983	311;312;313;314;1062;1063	13481;13484;13503;13507;13509;13511;13512;13513;13514;13515;13516	13834;13837;13857;13859;13861;13863;13864	13512	13864	Service_Sonenberg_150119_18
P48678	407	P48678	P48678	Prelamin-A/C;Lamin-A/C	Lmna		0.961148	14.656	2.46333e-115	163.8	153.05	102.08	2	S	SPTSQRSRGRASSHSSQSQGGGSVTKKRKLE	X;X;Phospho (STY);X;X;X;X;X;X;X;X;Phospho (STY);Phospho (STY);X;Phospho (STY);Phospho (STY);X;X;X;X;X;X;X;X;X;X;X;X;X;X;X	XXXXXXXXPPPPPPPPPPPPPPPPPPXXXXX	AS(0.967)S(0.033)HS(0.033)S(0.961)QS(0.006)QGGGSVTK	AS(14.66)S(-14.66)HS(-14.66)S(14.66)QS(-22.25)QGGGS(-57.09)VT(-69.76)K	6	2	0.16751	2103700	0	0	6679800	2901600	2257000	3508500	447620	1359800	3385600	3574800	3247700	534160	1982000	0	2210500	4484300	2555300	407	407	281;282;983	311;312;313;314;1062;1063	4365;4366;4367;4368;4369;4370;4371;4372;4373;4374;4375;4376;4377;4378;4379;13508;13509;13510;13511;13512;13513;13514;13515;13516	5390;5391;5392;5393;5394;5395;5396;5397;5398;5399;5400;5401;5402;5403;5404;5405;5406;5407;5408;5409;5410;5411;5412;5413;13860;13861;13862;13863;13864	4374	5405	Service_Sonenberg_150119_12
P48678	423	P48678	P48678	Prelamin-A/C;Lamin-A/C	Lmna		0.917331	11.7692	0.00503263	54.416	38.754	42.338	1	S	QSQGGGSVTKKRKLESSESRSSFSQHARTSG	Deamidation (NQ);X;Deamidation (NQ);X;X;X;X;X;X;X;X;X;X;X;X;Phospho (STY);X;X;X;X;X;X;X;X;X;X;X;X;X;X;X	XXXXXXXXXXXXPPPPPPPPXXXXXXXXXXX	KLES(0.917)S(0.061)ES(0.022)R	KLES(11.77)S(-11.77)ES(-16.27)R	4	2	0.79132	493010	332320	0	10591000	2690700	0	5556300	2415000	581880	0	7446200	4588800	0	0	0	2802400	4532800	1956200	423	423	1379	1497	19639;19640;19642;19643;19644;19646;19647;19649;19651;19653;19655;19657;19659;19660;19661;19663;19664	20059;20060;20061;20063;20064;20065;20066;20067;20069;20070;20073;20076;20078	19640	20060	Service_Sonenberg_150119_4
P48678	424	P48678	P48678	Prelamin-A/C;Lamin-A/C	Lmna		0.845934	7.77252	0.00262407	74.464	49.689	74.464	1	S	SQGGGSVTKKRKLESSESRSSFSQHARTSGR	X;Deamidation (NQ);X;X;X;X;X;X;X;X;X;X;X;X;X;Phospho (STY);X;X;X;X;X;X;X;X;X;X;X;X;X;X;X	XXXXXXXXXXXPPPPPPPPXXXXXXXXXXXX	KLES(0.013)S(0.846)ES(0.141)R	KLES(-18.21)S(7.77)ES(-7.77)R	5	2	0.4216	3084900	1191500	0	0	0	1312900	0	0	6995000	8554100	0	0	0	2895000	1841800	5226800	10933000	0	424	424	1379	1497	19645;19648;19650;19654;19656;19658;19662;19665;19666	20068;20071;20072;20074;20075	19650	20075	Service_Sonenberg_150119_17
P48678	277	P48678	P48678	Prelamin-A/C;Lamin-A/C	Lmna		1	61.4803	0.0037071	61.48	42.735	61.48	1	S	ELEKTYSAKLDNARQSAERNSNLVGAAHEEL	X;X;X;X;X;X;X;X;X;X;X;X;X;X;X;Phospho (STY);X;X;X;X;X;X;X;X;X;X;X;X;X;X;X	XXXXXXXXXPPPPPPPPPPXXXXXXXXXXXX	LDNARQS(1)AER	LDNARQS(61.48)AER	7	2	0.50645	763830	0	0	0	0	640740	2143700	285790	1518100	0	1290900	288760	0	1432600	0	0	1010900	587820	277	277	1543	1679	22071;22072;22073;22074;22075;22076;22077;22078;22079;22080	22574	22071	22574	Service_Sonenberg_150119_18
P48678	390	P48678	P48678	Prelamin-A/C;Lamin-A/C	Lmna		0.995597	23.8625	0.00159696	78.903	61.691	78.903	1;2	S	AYRKLLEGEEERLRLSPSPTSQRSRGRASSH	X;X;X;X;X;X;X;X;X;X;X;X;X;X;X;Phospho (STY);X;X;X;Phospho (STY);X;X;X;X;X;X;X;X;Phospho (STY);Phospho (STY);X	XXXXXXXXXXXXPPPPPPPPPPPXXXXXXXX	LRLS(0.996)PS(0.004)PTSQR	LRLS(23.86)PS(-23.86)PT(-35.3)S(-47.42)QR	4	2	0.90249	0	0	0	0	0	0	1043700	0	258820	421170	0	0	0	5466500	2251500	0	10517000	9011400	390	390	1643	1785;1786	23395;23396;23397;23398;23399;23400;23401;23402;23403	23648;23649	23395	23648	Service_Sonenberg_150119_7
P48678	22	P48678	P48678	Prelamin-A/C;Lamin-A/C	Lmna		0.880183	8.87247	4.04557e-07	96.673	82.43	65.472	1	S	RRATRSGAQASSTPLSPTRITRLQEKEDLQE	X;X;X;X;X;X;X;X;X;X;X;X;X;X;X;Phospho (STY);X;X;X;X;X;X;X;X;X;X;X;X;X;X;X	XXXXXPPPPPPPPPPPPPPXXXXXXXXXXXX	SGAQASS(0.001)T(0.005)PLS(0.88)PT(0.114)R	S(-53.61)GAQAS(-35.98)S(-29.58)T(-22.9)PLS(8.87)PT(-8.87)R	11	2	1.7552	19048000	6328300	15797000	22260000	16049000	16096000	18509000	9477500	10423000	15437000	19304000	12643000	14702000	17995000	10644000	19030000	29730000	18109000	22	22	2497	2743	35939;35940;35941;35942;35943;35944;35945;35946;35947;35948;35949;35950;35951;35952;35953;35954;35955;35956	36047;36048;36049;36050;36051;36052;36053;36054;36055;36056;36057;36058;36059;36060;36061;36062;36063;36064;36065;36066;36067;36068;36069;36070;36071;36072;36073;36074;36075;36076;36077;36078;36079;36080;36081;36082;36083;36084;36085;36086;36087;36088;36089	35950	36074	Service_Sonenberg_150119_12
P48725	1437	P48725	P48725	Pericentrin	Pcnt		1	69.6716	0.00245427	69.672	22.942	69.672	1	S	RALLQHENEVVHRRNSEIDELKSLIENLQEN	X;X;X;X;X;X;X;X;X;X;X;X;X;X;X;Phospho (STY);X;X;X;X;X;X;X;X;X;X;X;X;X;X;X	XXXXXXXXXXXXXPPPPPPPPPXXXXXXXXX	RNS(1)EIDELK	RNS(69.67)EIDELK	3	2	0.9073	0	0	0	451690	0	0	0	0	0	0	0	0	0	0	0	0	0	0	1437	1437	2195	2414	31246	30741	31246	30741	Service_Sonenberg_150119_4
P49312	4	P49312	P49312	Heterogeneous nuclear ribonucleoprotein A1;Heterogeneous nuclear ribonucleoprotein A1, N-terminally processed	Hnrnpa1		0.890535	9.18763	6.53661e-06	91.62	81.249	77.185	1;2	S	____________MSKSESPKEPEQLRKLFIG	X;X;X;X;X;X;X;X;X;X;X;X;X;Phospho (STY);X;Phospho (STY);X;Phospho (STY);X;X;X;X;X;X;X;X;X;X;X;X;X	XXXXXXXXXXXXXPPPPPPPPPPPPPXXXXX	S(0.107)KS(0.891)ES(0.002)PKEPEQLR	S(-9.19)KS(9.19)ES(-26.29)PKEPEQLR	3	2	0.099201	2819800	179860	16788000	19611000	30854000	301960	39169000	0	0	4014700	0	26369000	4008100	2435600	26543000	3155800	39324000	0	4	4	2461;2462;2615	2704;2705;2878;2879	37542;37544;37546;37550;37558;37563;37567;37571;37572;37574;37577;37578;37580;37581;37583;37584;37586	37669;37675;37681;37682;37683;37695;37696;37697;37721;37722;37731;37732;37733;37734;37744;37757;37759;37763;37764;37766;37767;37769;37770;37771	37550	37697	Service_Sonenberg_150119_7
P49312	6	P49312	P49312	Heterogeneous nuclear ribonucleoprotein A1;Heterogeneous nuclear ribonucleoprotein A1, N-terminally processed	Hnrnpa1		0.997982	26.7077	1.26997e-05	82.59	70.444	81.904	1;2	S	__________MSKSESPKEPEQLRKLFIGGL	X;X;X;X;X;X;X;X;X;X;X;Phospho (STY);X;Phospho (STY);X;Phospho (STY);X;X;X;X;X;X;X;X;X;X;X;X;X;X;X	XXXXXXXXXXXPPPPPPPPPPPPPPXXXXXX	S(0.948)KS(0.054)ES(0.998)PKEPEQLR	S(12.56)KS(-12.56)ES(26.71)PKEPEQLR	5	2	1.0976	2889700	7643800	8698100	0	12663000	11567000	11007000	4629800	12529000	23159000	10900000	9127000	15730000	10539000	11554000	0	21461000	9176900	6	6	2461;2462;2615	2704;2705;2878;2879	35377;35378;35379;35380;35381;35382;35383;35384;35385;35386;35387;35388;35389;35390;35391;35392;35393;35394;35395;35396;35397;35398;35399;35400;35401;35402;35403;35404;35405;35406;35407;35408;35409;35410;35411;35412;35413;35414;35415;35416;35417;35418;35419;35420;35421;35422;35423;35424;35425;35426;35427;35428;35429;35430;35431;35432;35433;35434;35435;35436;35437;37538;37539;37545;37547;37549;375…	35328;35329;35330;35331;35332;35333;35334;35335;35336;35337;35338;35339;35340;35341;35342;35343;35344;35345;35346;35347;35348;35349;35350;35351;35352;35353;35354;35355;35356;35357;35358;35359;35360;35361;35362;35363;35364;35365;35366;35367;35368;35369;35370;35371;35372;35373;35374;35375;35376;35377;35378;35379;35380;35381;35382;35383;35384;35385;35386;35387;35388;35389;35390;35391;35392;35393;353…	37576	37761	Service_Sonenberg_150119_6
P49312	2	P49312	P49312	Heterogeneous nuclear ribonucleoprotein A1;Heterogeneous nuclear ribonucleoprotein A1, N-terminally processed	Hnrnpa1		0.998035	24.6588	9.56871e-38	143.98	129.3	60.55	1;2	S	______________MSKSESPKEPEQLRKLF	X;X;X;X;X;X;X;X;X;X;X;X;X;X;X;Phospho (STY);X;Phospho (STY);X;Phospho (STY);X;X;X;X;X;X;X;X;X;X;X	XXXXXXXXXXXXXXXPPPPPPPPPPPPPXXX	S(0.998)KS(0.426)ES(0.576)PKEPEQLR	S(24.66)KS(-1.32)ES(1.32)PKEPEQLR	1	2	0.59602	2889700	1306400	23985000	23615000	4758100	3656200	516870	0	0	5837400	0	36942000	37181000	0	0	32535000	7741900	0	2	2	2615	2878;2879	37541;37543;37548;37552;37554;37557;37560;37566;37569;37572;37573;37574;37575;37576;37577;37578;37579;37580;37582;37585;37586;37587;37588	37664;37665;37666;37667;37668;37670;37671;37672;37673;37674;37688;37689;37690;37702;37703;37707;37708;37709;37710;37717;37718;37719;37720;37725;37726;37727;37740;37741;37742;37743;37746;37747;37748;37749;37750;37757;37758;37759;37760;37761;37762;37763;37764;37765;37766;37768	37573	37758	Service_Sonenberg_150119_2
P49586	315	P49586	P49586	Choline-phosphate cytidylyltransferase A	Pcyt1a		0.997858	29.4566	0.000121351	47.281	42.028	47.281	2	S	KHMLKEGKGRMLQAISPKQSPSSSPTHERSP	X;X;X;X;X;X;X;X;X;X;X;X;X;X;X;Phospho (STY);X;X;X;Phospho (STY);X;X;Phospho (STY);Phospho (STY);X;X;X;X;X;X;X	XXXXXXXXXXPPPPPPPPPPPPPPPPPPPXX	MLQAIS(0.998)PKQS(0.922)PS(0.058)S(0.016)S(0.005)PT(0.001)HER	MLQAIS(29.46)PKQS(12.1)PS(-12.1)S(-17.69)S(-22.93)PT(-32.23)HER	6	3	-0.74307	3477200	1495100	1343500	418230	0	1779800	3322200	1897300	0	4774800	2637100	2391900	2677200	1888600	2785200	2806600	3082900	2856700	315	315	1727	1885	24399;24400;24401;24402;24403;24404;24405;24406;24407;24408;24409;24410;24411;24412;24413;24414;24415;24416;24417	24356;24357;24358;24359	24400	24357	Service_Sonenberg_150119_7
P49586	319	P49586	P49586	Choline-phosphate cytidylyltransferase A	Pcyt1a		0.998295	28.1724	0.000121351	90.15	69.249	56.139	1;2	S	KEGKGRMLQAISPKQSPSSSPTHERSPSPSF	X;X;X;X;X;X;X;X;X;X;X;Phospho (STY);X;X;X;Phospho (STY);X;X;X;Phospho (STY);X;X;X;X;X;X;X;Phospho (STY);X;X;X	XXXXXXPPPPPPPPPPPPPPPPPPPXXXXXX	QS(0.998)PS(0.005)S(0.22)S(0.696)PT(0.081)HER	QS(28.17)PS(-22.87)S(-5)S(5)PT(-9.34)HER	2	2	-0.37076	6097700	1495100	1343500	418230	0	1779800	7298400	2933700	2452500	4774800	2637100	2391900	2677200	1888600	4538800	2806600	3082900	4774400	319	319	1727;2012	1885;2214;2215	24399;24400;24401;24402;24403;24404;24405;24406;24407;24408;24409;24410;24411;24412;24413;24414;24415;24416;24417;28601;28604;28608;28610;28611;28612;28613;28614;28615;28616;28617;28618;28619	24356;24357;24358;24359;28058;28061;28065;28067;28068;28069	28613	28068	Service_Sonenberg_150119_1
P49586	322	P49586	P49586	Choline-phosphate cytidylyltransferase A	Pcyt1a		0.711445	7.77231	0.000466285	90.614	68.763	78.324	1	S	KGRMLQAISPKQSPSSSPTHERSPSPSFRWP	X;X;X;X;X;X;X;X;X;X;X;X;X;X;X;Phospho (STY);X;X;X;X;X;X;X;X;Phospho (STY);X;X;X;X;X;X	XXXXXXXXXXXPPPPPPPPPPPXXXXXXXXX	QS(0.119)PS(0.084)S(0.711)S(0.084)PT(0.002)HER	QS(-7.77)PS(-9.29)S(7.77)S(-9.29)PT(-24.88)HER	5	2	-0.44642	0	0	0	0	0	0	0	0	0	0	0	0	0	0	0	0	3153900	0	322	322	1727;2012	1885;2214;2215	28609	28066	28609	28066	Service_Sonenberg_150119_17
P49586	323	P49586	P49586	Choline-phosphate cytidylyltransferase A	Pcyt1a		0.771682	5.81456	0.000466285	90.614	68.763	60.157	1;2	S	GRMLQAISPKQSPSSSPTHERSPSPSFRWPF	X;X;X;X;X;X;X;X;X;X;X;Phospho (STY);X;X;X;Phospho (STY);X;X;X;X;X;X;X;Phospho (STY);X;X;X;X;X;X;X	XXXXXXXXXXPPPPPPPPPPPXXXXXXXXXX	QS(0.997)PS(0.011)S(0.202)S(0.772)PT(0.018)HER	QS(25.77)PS(-19.68)S(-5.81)S(5.81)PT(-16.4)HER	6	2	0.4219	1291200	0	0	0	0	0	1208100	0	0	1318700	3482100	0	2206400	1184500	664670	0	636280	0	323	323	1727;2012	1885;2214;2215	28606;28613;28614;28615;28616;28617;28618;28619	28063;28068;28069	28614	28069	Service_Sonenberg_150119_15
P49586	331	P49586	P49586	Choline-phosphate cytidylyltransferase A	Pcyt1a		0.999993	52.299	9.01043e-08	138.78	111.53	136.8	1	S	PKQSPSSSPTHERSPSPSFRWPFSGKTSPSS	X;X;X;Phospho (STY);X;X;Phospho (STY);Phospho (STY);X;X;X;X;X;X;X;Phospho (STY);X;X;X;X;X;X;X;X;X;X;Phospho (STY);X;X;X;X	XXXXXXXXXXXXXPPPPPPPXXXXXXXXXXX	SPS(1)PSFR	S(-52.3)PS(52.3)PS(-58.28)FR	3	2	0.53102	20206000	3220400	13632000	5627200	6060000	5217900	13601000	6742700	15176000	9236700	0	8121100	18147000	14950000	13615000	6767500	10871000	7617800	331	331	2730	3004	39271;39272;39273;39274;39275;39276;39277;39278;39279;39280;39281;39282;39283;39284;39285;39286;39287;39288;39289	39488;39489;39490;39491;39492;39493;39494;39495;39496;39497;39498;39499;39500;39501;39502;39503;39504;39505;39506;39507;39508;39509;39510;39511;39512;39513;39514;39515;39516;39517;39518;39519;39520;39521;39522;39523;39524;39525;39526;39527;39528;39529;39530;39531;39532;39533;39534;39535;39536;39537;39538;39539;39540;39541;39542;39543;39544;39545;39546;39547;39548;39549;39550;39551;39552;39553;395…	39279	39552	Service_Sonenberg_150119_9
P49586	343	P49586	P49586	Choline-phosphate cytidylyltransferase A	Pcyt1a		0.499723	0	0.000887367	89.827	66.103	64.82		S	RSPSPSFRWPFSGKTSPSSSPASLSRCRAVT	X;X;X;Phospho (STY);X;X;X;X;X;X;X;X;X;X;X;X;X;X;X;X;X;X;X;X;X;X;X;X;X;X;X	XXXXXXXXXXXXXXXXXXXXXXXXXXXXXXX	T(0.5)S(0.5)PSSSPASLSR	T(0)S(0)PS(-30.94)S(-36.46)S(-41.11)PAS(-57.65)LS(-60.48)R	2	2	0.54979	0	0	0	0	0	0	0	0	0	0	0	0	0	0	0	0	0	0	343	343	3198	3517			46325	47059	Service_Sonenberg_150119_5
P49586	347	P49586	P49586	Choline-phosphate cytidylyltransferase A	Pcyt1a		0.852173	7.88681	0.000296966	90.412	58.083	67.456	1	S	PSFRWPFSGKTSPSSSPASLSRCRAVTCDIS	X;X;X;X;X;X;X;X;X;X;X;X;X;X;X;Phospho (STY);X;X;X;X;X;X;X;X;X;X;X;X;X;X;X	XXXXXXXXXXPPPPPPPPPPPPXXXXXXXXX	TSPS(0.003)S(0.139)S(0.852)PAS(0.003)LS(0.003)R	T(-35.96)S(-35.96)PS(-24.65)S(-7.89)S(7.89)PAS(-24.65)LS(-24.65)R	6	2	-0.24894	0	886880	0	2056900	0	1821800	0	793460	3223300	4755600	3927100	2335500	0	2870700	0	3231600	3887200	2749800	347	347	3198	3517	46320;46323;46326;46330;46332;46334;46336;46339;46343;46345;46348;46349	47048;47054;47060;47069;47070;47074;47075;47079;47082;47083;47088;47089;47098;47101;47102	46343	47098	Service_Sonenberg_150119_17
P49717	2	P49717	P49717	DNA replication licensing factor MCM4	Mcm4		0.498833	0	0.000829825	47.894	29.835	47.894		S	______________MSSPASTPSRRSSRRGR	X;X;X;X;X;X;X;X;X;X;X;X;X;X;X;Phospho (STY);X;X;X;X;X;X;X;X;X;X;X;X;X;X;X	XXXXXXXXXXXXXXXPPPPPPPPPPXXXXXX	S(0.499)S(0.499)PAS(0.001)T(0.001)PSRR	S(0)S(0)PAS(-26.5)T(-26.5)PS(-36.97)RR	1	2	-0.53403	0	0	0	0	0	0	0	0	0	0	0	0	0	0	0	0	0	0	2	2	2859	3148			41321	41813	Service_Sonenberg_150119_7
P49717	3	P49717	P49717	DNA replication licensing factor MCM4	Mcm4		0.498833	0	0.000829825	47.894	29.835	47.894		S	_____________MSSPASTPSRRSSRRGRV	X;X;X;X;X;X;X;X;X;X;X;X;X;X;X;X;X;X;X;X;X;X;X;X;X;X;X;X;X;X;X	XXXXXXXXXXXXXXXXXXXXXXXXXXXXXXX	S(0.499)S(0.499)PAS(0.001)T(0.001)PSRR	S(0)S(0)PAS(-26.5)T(-26.5)PS(-36.97)RR	2	2	-0.53403	0	0	0	0	0	0	0	0	0	0	0	0	0	0	0	0	0	0	3	3	2859	3148			41321	41813	Service_Sonenberg_150119_7
P49769	327	P49769	P49769	Presenilin-1;Presenilin-1 NTF subunit;Presenilin-1 CTF subunit;Presenilin-1 CTF12	Psen1		0.484813	0	9.62463e-08	48.115	42.513	48.115		S	NPKYNTQRAERETQDSGSGNDDGGFSEEWEA	X;X;X;X;X;X;X;X;X;X;X;X;X;X;X;Phospho (STY);X;X;X;X;X;X;X;X;X;X;X;X;X;X;X	XXXXXXXXPPPPPPPPPPPPPPPPPPPPPPP	AERET(0.024)QDS(0.485)GS(0.485)GNDDGGFS(0.007)EEWEAQR	AERET(-13.1)QDS(0)GS(0)GNDDGGFS(-18.65)EEWEAQR	8	3	1.2139	0	0	0	0	0	0	0	0	0	0	0	0	0	0	0	0	0	0	327	327	70	75			929	925	Service_Sonenberg_150119_1
P49769	329	P49769	P49769	Presenilin-1;Presenilin-1 NTF subunit;Presenilin-1 CTF subunit;Presenilin-1 CTF12	Psen1		0.74139	6.40708	9.62463e-08	48.115	42.513	41.423	1	S	KYNTQRAERETQDSGSGNDDGGFSEEWEAQR	X;X;X;X;X;X;X;X;X;X;X;X;X;X;X;Phospho (STY);X;X;X;X;X;X;X;X;X;X;X;X;X;X;X	XXXXXXPPPPPPPPPPPPPPPPPPPPPPPPP	AERET(0.047)QDS(0.17)GS(0.741)GNDDGGFS(0.042)EEWEAQR	AERET(-11.95)QDS(-6.41)GS(6.41)GNDDGGFS(-12.49)EEWEAQR	10	3	0.92506	0	635410	0	0	0	0	0	0	0	0	0	0	0	0	0	0	0	0	329	329	70	75	930	926	930	926	Service_Sonenberg_150119_2
P49769	57	P49769	P49769	Presenilin-1;Presenilin-1 NTF subunit;Presenilin-1 CTF subunit;Presenilin-1 CTF12	Psen1		0.664673	3.22447	1.23468e-06	59.212	48.005	59.212	1	S	QRLDNPEPISNGRPQSNSRQVVEQDEEEDEE	X;X;X;X;X;X;X;X;X;X;Deamidation (NQ);X;X;X;X;Phospho (STY);X;X;X;X;X;X;X;X;X;X;X;X;X;X;X	PPPPPPPPPPPPPPPPPPPXXXXXXXXXXXX	QRLDNPEPIS(0.017)NGRPQS(0.665)NS(0.318)R	QRLDNPEPIS(-15.98)NGRPQS(3.22)NS(-3.22)R	16	3	0.80195	1035800	860190	0	0	0	0	743360	0	0	890880	857040	556490	703850	524120	464640	707340	1621600	674160	57	57	2004	2206	28505;28506;28507;28509;28510;28511;28512;28513;28514;28515;28516;28517	27992	28505	27992	Service_Sonenberg_150119_18
P49769	59	P49769	P49769	Presenilin-1;Presenilin-1 NTF subunit;Presenilin-1 CTF subunit;Presenilin-1 CTF12	Psen1		0.547777	0.848261	0.000876157	52.909	44.09	52.909	1	S	LDNPEPISNGRPQSNSRQVVEQDEEEDEELT	X;X;X;X;X;X;X;X;Deamidation (NQ);X;X;X;X;X;X;Phospho (STY);X;X;X;X;X;X;X;X;X;X;X;X;X;X;X	PPPPPPPPPPPPPPPPPXXXXXXXXXXXXXX	QRLDNPEPIS(0.001)NGRPQS(0.451)NS(0.548)R	QRLDNPEPIS(-27.7)NGRPQS(-0.85)NS(0.85)R	18	3	0.9087	0	0	605840	1069800	0	0	0	0	0	0	0	0	0	0	0	0	0	0	59	59	2004	2206	28503;28508	27990	28503	27990	Service_Sonenberg_150119_4
P49769	32	P49769	P49769	Presenilin-1;Presenilin-1 NTF subunit;Presenilin-1 CTF subunit;Presenilin-1 CTF12	Psen1		0.999534	33.31	4.01066e-10	78.285	48.597	72.819	1	S	SEDSHSSSAIRSQNDSQERQQQHDRQRLDNP	X;X;X;X;X;X;X;X;X;X;X;X;X;X;X;Phospho (STY);X;X;X;X;X;X;X;X;X;X;X;X;X;X;X	XXXXXXXXXXXPPPPPPPPPPPPPPXXXXXX	SQNDS(1)QERQQQHDR	S(-33.31)QNDS(33.31)QERQQQHDR	5	3	-0.59703	12358000	4800900	9307900	0	0	0	0	1927700	0	0	12995000	14061000	0	7403100	6250600	0	0	0	32	32	2750	3028	39551;39552;39553;39554;39555;39556;39557;39558;39559;39560;39561;39562;39563;39564	39809;39810;39811;39812;39813;39814;39815;39816;39817;39818;39819	39551	39809	Service_Sonenberg_150119_1
P50580	2	P50580	P50580	Proliferation-associated protein 2G4	Pa2g4		0.999738	35.8269	5.99895e-11	62.064	58.342	62.064	1	S	______________MSGEDEQQEQTIAEDLV	X;X;X;X;X;X;X;X;X;X;X;X;X;X;X;Phospho (STY);X;X;X;X;X;X;X;X;X;X;X;X;X;X;X	XXXXXXXXXXXXXXXPPPPPPPPPPPPPPPP	S(1)GEDEQQEQTIAEDLVVTK	S(35.83)GEDEQQEQT(-35.83)IAEDLVVT(-59.67)K	1	3	0.392	2756700	1520400	326130	181390	159080	0	0	0	0	0	0	0	174870	64579	0	0	0	140270	2	2	2506	2757	36088;36089;36090;36091;36092;36093;36094;36095	36216;36217;36218;36219;36220;36221;36222;36223;36224;36225;36226;36227;36228;36229	36088	36218	Service_Sonenberg_150119_1
P51125	163	P51125	P51125	Calpastatin	Cast		0.849282	7.69349	5.47742e-13	75.797	59.855	40.085	1	S	TSSTGSKHAHKEKALSRSNEQMVSEKPSESK	X;X;X;X;X;X;X;X;X;X;X;X;X;X;X;Phospho (STY);X;Phospho (STY);X;X;X;Oxidation (M);X;X;X;X;X;X;X;X;X	XXXXXXXXXXXXXPPPPPPPPPPPPPPPPPP	ALS(0.849)RS(0.144)NEQMVS(0.005)EKPSES(0.001)K	ALS(7.69)RS(-7.69)NEQMVS(-22.19)EKPS(-33.05)ES(-30.7)K	3	3	0.23872	7753500	4368700	5479200	6527100	0	0	0	6961700	0	12299000	0	0	0	0	0	0	0	0	163	163	180	193;194	2655;2656;2657;2659;2660;2661;2662;2663;2665;2666;2668	2626;2627;2628;2631;2632;2633;2634;2635;2637;2638	2663	2635	Service_Sonenberg_150119_3
P51125	165	P51125	P51125	Calpastatin	Cast		0.999018	31.8299	5.47742e-13	75.797	59.855	40.237	1	S	STGSKHAHKEKALSRSNEQMVSEKPSESKTK	X;X;X;X;X;X;X;X;X;X;X;X;X;X;X;Phospho (STY);X;X;X;Oxidation (M);X;X;X;X;X;X;X;X;X;X;X	XXXXXXXXXXXPPPPPPPPPPPPPPPPPPXX	S(0.999)NEQMVS(0.001)EKPSESK	S(31.83)NEQMVS(-31.83)EKPS(-37.94)ES(-37.81)K	1	2	0.74955	723090	308840	0	0	0	256870	845110	234690	420820	515110	511990	583190	627710	0	0	0	393450	213060	165	165	180;2685	193;194;2957	2645;2647;2651;2653;2656;2658;2660;2662;2664;38628;38629;38630;38631;38632;38633;38634;38635;38636;38637;38638;38639	2615;2617;2621;2622;2624;2627;2629;2630;2634;2636;38908;38909	38628	38908	Service_Sonenberg_150119_1
P51125	219	P51125	P51125	Calpastatin	Cast		0.653132	3.09647	8.62019e-07	54.668	46.675	40.622	1	S	KVVGKKKEQKPFTPASPVQSTPSKPSDKSGM	X;X;X;X;X;X;X;X;X;X;X;X;X;X;X;Phospho (STY);X;X;X;X;X;X;X;X;X;X;X;X;X;X;X	XXXXXXXPPPPPPPPPPPPPPPPPPPPPXXX	EQKPFT(0.32)PAS(0.653)PVQS(0.019)T(0.007)PS(0.001)KPSDK	EQKPFT(-3.1)PAS(3.1)PVQS(-15.37)T(-19.7)PS(-30.47)KPS(-36.5)DK	9	3	-0.3237	0	0	0	0	0	0	0	4777200	0	42636000	33706000	0	0	0	0	0	0	30074000	219	219	710	771	9868;9869;9870;9871	10464;10465;10466	9870	10466	Service_Sonenberg_150119_18
P51125	477	P51125	P51125	Calpastatin	Cast		0.492182	0	1.88263e-06	67.08	62.688	67.08		S	QDKPSTPAEKKSNDTSQTPPGETVPRASMCS	X;X;X;X;X;X;X;X;X;X;X;X;X;X;X;Phospho (STY);X;X;X;X;X;X;X;X;X;X;X;X;X;X;X	XXXXXXXXXXXPPPPPPPPPPPPPPPXXXXX	SNDT(0.015)S(0.492)QT(0.492)PPGETVPR	S(-34.83)NDT(-15.08)S(0)QT(0)PPGET(-33.93)VPR	5	2	0.2288	0	0	0	0	0	0	0	0	0	0	0	0	0	0	0	0	0	0	477	477	1464;2683	1591;2955			38619	38887	Service_Sonenberg_150119_12
P51125	11	P51125	P51125	Calpastatin	Cast		0.999954	43.3398	9.53576e-07	72.321	34.575	70.438	1	S	_____MSQPGPKPAASPRPSRGAAARHTQEH	X;X;X;X;X;X;X;X;X;X;X;X;X;X;X;Phospho (STY);X;X;X;X;X;X;X;X;X;X;X;X;X;X;X	XXXXXXPPPPPPPPPPPPPPPXXXXXXXXXX	SQPGPKPAAS(1)PR	S(-43.34)QPGPKPAAS(43.34)PR	10	2	-1.9805	11330000	6157200	0	7780800	0	1830100	11222000	5128600	6203100	14104000	12691000	8716000	16817000	18687000	11958000	2371000	6427200	4901000	11	11	1908;2752;2753	2102;3030;3031	27387;27388;27389;27390;27391;27392;27393;27394;27395;27396;27397;27398;27399;27400;27401;27402;39580;39581;39582;39583;39584;39585;39586;39587;39588;39589;39590;39591;39592;39593;39594;39595;39596;39597;39598;39599;39600;39601;39602;39603;39604;39605;39606;39607	27149;27150;27151;27152;27153;27154;27155;27156;27157;27158;39832;39833;39834;39835;39836;39837;39838;39839;39840;39841;39842;39843;39844;39845;39846;39847;39848;39849;39850;39851;39852;39853;39854;39855;39856;39857;39858;39859;39860;39861;39862;39863;39864;39865;39866;39867;39868;39869	39594	39855	Service_Sonenberg_150119_18
P51125	79	P51125	P51125	Calpastatin	Cast		0.402424	0	0.000114358	43.81	36.919	43.81		S	EAATATKVTASSAATSKSPSMSTTETKAIPV	X;X;X;X;X;X;X;X;X;X;X;X;X;X;X;X;X;X;X;X;X;X;X;X;X;X;X;X;X;X;X	XXXXXXXXXXXXXXXXXXXXXXXXXXXXXXX	VT(0.005)AS(0.036)S(0.11)AAT(0.402)S(0.402)KS(0.041)PS(0.002)MS(0.001)TTETK	VT(-19.26)AS(-10.44)S(-5.65)AAT(0)S(0)KS(-9.89)PS(-22.54)MS(-29.01)T(-31.76)T(-34.69)ET(-37.52)K	9	3	-1.5162	0	0	0	0	0	0	0	0	0	0	0	0	0	0	0	0	0	0	79	79	3395	3732			49023	49286	Service_Sonenberg_150119_12
P51125	81	P51125	P51125	Calpastatin	Cast		0.651086	5.6533	7.76395e-05	45.546	29.147	45.546	1	S	ATATKVTASSAATSKSPSMSTTETKAIPVNK	X;X;X;X;X;X;X;X;X;X;X;X;X;X;X;Phospho (STY);X;X;X;X;X;X;X;X;X;X;X;X;X;X;X	XXXXXPPPPPPPPPPPPPPPPPPPPXXXXXX	VT(0.005)AS(0.039)S(0.035)AAT(0.035)S(0.035)KS(0.651)PS(0.177)MS(0.015)T(0.005)T(0.002)ET(0.001)K	VT(-21)AS(-12.18)S(-12.71)AAT(-12.71)S(-12.71)KS(5.65)PS(-5.65)MS(-16.28)T(-21.2)T(-25.81)ET(-30.49)K	11	3	-1.2674	0	0	0	0	0	0	0	3056000	0	0	0	0	0	0	0	0	0	0	81	81	3395	3732	49022	49285	49022	49285	Service_Sonenberg_150119_8
P51150	72	P51150	P51150	Ras-related protein Rab-7a	Rab7a		1	76.588	0.000674114	87.298	68.986	87.298	1	S	VTMQIWDTAGQERFQSLGVAFYRGADCCVLV	X;X;X;X;X;X;X;X;X;X;X;X;X;X;X;Phospho (STY);X;X;X;X;X;X;X;X;X;X;X;X;X;X;X	XXXXXXXXXXXXXPPPPPPPPPPXXXXXXXX	FQS(1)LGVAFYR	FQS(76.59)LGVAFY(-76.59)R	3	2	1.186	1333900	591940	1545500	892560	645600	665290	576870	526190	824680	806060	327090	224470	146190	651430	332780	0	548750	1121300	72	72	819	893	11473;11474;11475;11476;11477;11478;11479;11480;11481;11482;11483;11484;11485;11486;11487;11488;11489;11490	12154;12155;12156;12157;12158;12159;12160;12161;12162;12163;12164;12165;12166;12167;12168;12169;12170;12171;12172;12173;12174;12175;12176;12177;12178;12179;12180;12181;12182;12183;12184;12185;12186;12187;12188;12189;12190;12191;12192;12193;12194;12195;12196;12197;12198;12199;12200;12201	11473	12156	Service_Sonenberg_150119_1
P51432	1105	P51432	P51432	1-phosphatidylinositol 4,5-bisphosphate phosphodiesterase beta-3	Plcb3		0.992863	21.434	0.0178436	43.492	27.611	43.492	1	S	EKKELQKILDRKRNNSISEAKTREKHKKEVE	X;X;X;X;X;X;X;X;X;X;X;X;X;X;X;Phospho (STY);X;X;X;X;X;X;X;X;X;X;X;X;X;X;X	XXXXXXXXXXXXXPPPPPPPPXXXXXXXXXX	NNS(0.993)IS(0.007)EAK	NNS(21.43)IS(-21.43)EAK	3	2	0.17845	0	1127600	0	0	0	0	0	288990	0	0	0	0	0	0	0	0	910190	0	1105	1105	1843	2025	26328;26329;26330	26206	26328	26206	Service_Sonenberg_150119_2
P51682	351	P51682	P51682	C-C chemokine receptor type 5	Ccr5		0.886167	9.07251	0.000969821	68.657	57.436	59.426	1	S	RASSVYTRSTGEHEVSTGL____________	X;X;X;X;X;X;X;X;X;X;X;X;X;X;X;Phospho (STY);X;X;X;X;X;X;X;X;X;X;X;X;X;X;X	XXXXXXXXPPPPPPPPPPPXXXXXXXXXXXX	S(0.002)T(0.002)GEHEVS(0.886)T(0.11)GL	S(-26.34)T(-26.34)GEHEVS(9.07)T(-9.07)GL	8	2	0.55119	0	6039600	2778300	0	0	4635600	4403900	2794400	0	3730500	0	0	0	2353300	0	2490700	2963500	2464600	351	351	2942	3238	42607;42608;42609;42610;42613;42615;42616;42617;42618;42619	43366;43367;43368;43369;43370;43371;43372;43375;43376	42608	43369	Service_Sonenberg_150119_3
P51859	165	P51859	P51859	Hepatoma-derived growth factor	Hdgf		1	43.3824	9.58796e-06	94.191	75.924	43.382	1	S	EKGTLKRRAGDVLEDSPKRPKESGDHEEEDK	X;X;X;X;X;X;X;X;X;X;X;X;X;X;X;Phospho (STY);X;X;X;X;X;X;X;X;X;X;X;X;X;X;X	XXXXXXXPPPPPPPPPPPPPPXXXXXXXXXX	RAGDVLEDS(1)PK	RAGDVLEDS(43.38)PK	9	2	-0.15901	90165000	56570000	74205000	51696000	50519000	52512000	56195000	87240000	64262000	81580000	73489000	65502000	76101000	113430000	75084000	43616000	83657000	53030000	165	165	87;88;2032	92;93;2236	1115;1116;1117;1118;1119;1120;1121;1122;1123;1124;1125;1126;1127;1128;1129;1130;1131;1132;1133;1134;1135;1136;1137;1138;1139;1140;1141;1142;1143;1144;1145;1146;1147;1148;1149;1150;1151;1152;1153;1154;1155;1156;1157;1158;1159;1160;1161;1162;1163;1164;1165;1166;1167;1168;1169;1170;1171;1172;1173;1174;1175;1176;1177;28887;28888;28889	1081;1082;1083;1084;1085;1086;1087;1088;1089;1090;1091;1092;1093;1094;1095;1096;1097;1098;1099;1100;1101;1102;1103;1104;1105;1106;1107;1108;1109;1110;1111;1112;1113;1114;1115;1116;1117;1118;1119;1120;1121;1122;1123;1124;1125;1126;1127;1128;1129;1130;1131;1132;1133;1134;1135;1136;1137;1138;1139;1140;1141;1142;1143;1144;1145;1146;1147;1148;1149;1150;1151;1152;1153;1154;1155;1156;1157;1158;1159;1160…	28889	28286	Service_Sonenberg_150119_5
P51954	997	P51954	P51954	Serine/threonine-protein kinase Nek1	Nek1		0.945931	12.449	0.00599857	47.894	36.672	47.894	1	S	TGLFDANNPKMLRTCSLPDLSKLFRTLMDVP	X;X;X;X;X;X;X;X;X;X;X;X;X;X;X;Phospho (STY);X;X;X;X;X;X;X;X;X;X;X;X;X;X;X	XXXXXXXXXXXXXPPPPPPPPPXXXXXXXXX	T(0.054)CS(0.946)LPDLSK	T(-12.45)CS(12.45)LPDLS(-35.83)K	3	2	0.90516	0	543270	766620	0	0	0	725080	379080	451500	0	0	0	0	342340	0	0	0	0	997	997	3042	3348	44045;44046;44047;44048;44049;44050	44928	44045	44928	Service_Sonenberg_150119_2
P52482	2	P52482	P52482	Ubiquitin-conjugating enzyme E2 E1	Ube2e1		0.979065	17.1749	1.58311e-83	107.04	100.82	106.36	1	S	______________MSDDDSRASTSSSSSSS	X;X;X;X;X;X;X;X;X;X;X;X;X;X;X;Phospho (STY);X;X;X;X;X;X;X;X;X;X;X;X;X;X;X	XXXXXXXXXXXXXXXPPPPPPPPPPPPPPPP	S(0.979)DDDS(0.019)RAS(0.002)TSSSSSSSSNQQTEKEGSTPK	S(17.17)DDDS(-17.17)RAS(-27.81)T(-32.99)S(-43.96)S(-48.79)S(-53.5)S(-63.27)S(-62.56)S(-71.05)S(-73.75)S(-77.62)NQQT(-84.44)EKEGS(-100.93)T(-104.48)PK	1	3	-0.28856	2208000	1084600	0	0	1897800	2660100	3672600	1202100	0	3799900	0	0	1977500	0	0	0	0	0	2	2	2420	2662	34850;34851;34852;34853;34854;34855;34857;34862	34730;34731;34732;34733;34734;34735;34736;34737;34738;34740;34741	34854	34736	Service_Sonenberg_150119_7
P52482	6	P52482	P52482	Ubiquitin-conjugating enzyme E2 E1	Ube2e1		0.483453	0	5.66626e-50	74.063	68.097	65.377		S	__________MSDDDSRASTSSSSSSSSNQQ	X;X;X;X;X;X;X;X;X;X;X;X;X;X;X;Phospho (STY);X;X;X;X;X;X;X;X;X;X;X;X;X;X;X	XXXXXXXXXXXPPPPPPPPPPPPPPPPPPPP	S(0.483)DDDS(0.483)RAS(0.025)T(0.006)S(0.002)SSSSSSSNQQTEKEGSTPK	S(0)DDDS(0)RAS(-12.91)T(-19.06)S(-24.97)S(-30.63)S(-35.33)S(-35)S(-41.62)S(-41.34)S(-43.76)S(-43.76)NQQT(-55.49)EKEGS(-63.43)T(-63.36)PK	5	3	-0.60607	0	0	0	0	0	0	0	0	0	0	0	0	0	0	0	0	0	0	6	6	2420	2662			34858	34742	Service_Sonenberg_150119_14
P52482	9	P52482	P52482	Ubiquitin-conjugating enzyme E2 E1	Ube2e1		0.323298	1.20353	6.9617e-18	51.848	45.818	51.848		S	_______MSDDDSRASTSSSSSSSSNQQTEK	X;X;X;X;X;X;X;X;X;X;X;X;X;X;X;Phospho (STY);X;X;X;X;X;X;X;X;X;X;X;X;X;X;X	XXXXXXXXPPPPPPPPPPPPPPPPPPPPPPP	S(0.229)DDDS(0.245)RAS(0.323)T(0.079)S(0.091)S(0.023)S(0.006)S(0.002)S(0.001)S(0.001)SSNQQTEKEGSTPK	S(-1.5)DDDS(-1.2)RAS(1.2)T(-6.1)S(-5.53)S(-11.44)S(-17.1)S(-22.48)S(-27.55)S(-27.55)S(-32.16)S(-36.8)NQQT(-40.85)EKEGS(-50.01)T(-49.97)PK	8	3	-0.23271	0	0	0	0	0	0	0	0	0	0	0	0	0	0	0	0	0	0	9	9	2420	2662			34861	34746	Service_Sonenberg_150119_18
P52592	331	P52592	P52592	Sphingosine 1-phosphate receptor 2	S1pr2		0.578358	1.37464	0.0106303	69.598	7.0519	69.598	1	S	RGGNPGHRLLPLRSSSSLERGMHMPTSPTFL	X;X;X;X;X;X;X;X;X;X;X;X;X;X;X;Phospho (STY);X;X;X;X;X;X;X;X;X;X;X;X;X;X;X	XXXXXXXXXXXXXPPPPPPPXXXXXXXXXXX	SSS(0.578)S(0.421)LER	S(-42.64)S(-35.21)S(1.37)S(-1.37)LER	3	2	-1.5572	0	0	0	0	0	0	0	0	0	13811000	3591200	0	0	0	0	0	0	997760	331	331	2908	3200	42094;42100;42102	42787	42094	42787	Service_Sonenberg_150119_10
P52592	332	P52592	P52592	Sphingosine 1-phosphate receptor 2	S1pr2		0.883029	8.79543	0.0162096	68.224	7.7872	57.59	1	S	GGNPGHRLLPLRSSSSLERGMHMPTSPTFLE	X;X;X;X;X;X;X;X;X;X;X;X;X;X;X;Phospho (STY);X;X;X;X;X;X;X;X;X;X;X;X;X;X;X	XXXXXXXXXXXXPPPPPPPXXXXXXXXXXXX	SSS(0.117)S(0.883)LER	S(-42.15)S(-33.56)S(-8.8)S(8.8)LER	4	2	-1.521	0	7561700	14551000	4578400	0	0	0	4414900	6526800	1253300	0	4064500	4686200	10021000	5236600	0	0	0	332	332	2908	3200	42088;42089;42090;42091;42092;42093;42095;42096;42097;42098;42099;42101	42781;42782;42783;42784;42785;42786;42788;42789;42790;42791;42792	42097	42791	Service_Sonenberg_150119_14
P53349	517	P53349	P53349	Mitogen-activated protein kinase kinase kinase 1	Map3k1		0.558093	1.01599	0.000469145	44.807	29.99	44.807	1	S	SPVESPASLRAVQQPSSPQQPVAGSQRRNQE	X;X;X;X;X;X;X;X;X;X;X;X;X;X;X;Phospho (STY);X;X;X;X;X;X;X;X;X;X;X;X;X;X;X	XXXXXXXXXXPPPPPPPPPPPPPPPPPXXXX	AVQQPS(0.558)S(0.442)PQQPVAGSQR	AVQQPS(1.02)S(-1.02)PQQPVAGS(-33.92)QR	6	2	-0.13708	0	0	0	0	0	0	0	0	0	565580	0	0	0	0	0	0	0	906750	517	517	338	373	4979;4980	6135	4979	6135	Service_Sonenberg_150119_18
P53349	142	P53349	P53349	Mitogen-activated protein kinase kinase kinase 1	Map3k1		0.803906	6.17814	3.95258e-10	60.814	49.96	45.094	1	S	SHSAELAAARDSGARSPAGAEPPSAAAPSGR	X;X;X;X;X;X;X;X;X;X;X;X;X;X;X;Phospho (STY);X;X;X;X;X;X;X;X;X;X;X;X;X;X;X	XXXXXXXXXXPPPPPPPPPPPPPPPPPPPPP	DS(0.194)GARS(0.804)PAGAEPPS(0.002)AAAPS(0.001)GR	DS(-6.18)GARS(6.18)PAGAEPPS(-26.56)AAAPS(-32.06)GR	6	2	-0.94234	6789200	0	0	0	3045400	4630900	7710700	3490100	5868600	4088200	6828300	3682200	8437800	8249600	5120000	4548800	5778000	3888100	142	142	511	558	7161;7162;7163;7164;7165;7166;7167;7168;7169;7170;7171;7172;7173;7174;7175;7176;7177;7178;7179;7180;7181;7182;7183;7184;7185;7186	7993;7994;7995	7162	7995	Service_Sonenberg_150119_7
P53349	915	P53349	P53349	Mitogen-activated protein kinase kinase kinase 1	Map3k1		0.781575	6.47023	0.00224272	47.712	30.086	47.712		S	REKTGKGLSATRLSASSEDISDRLAGVSVGL	X;X;X;X;X;X;X;X;X;X;X;X;X;X;X;Phospho (STY);X;X;X;X;X;X;X;X;X;X;X;X;X;X;X	XXXXXXXXXXXXPPPPPPPPPPPXXXXXXXX	LS(0.041)AS(0.782)S(0.176)EDIS(0.001)DR	LS(-12.75)AS(6.47)S(-6.47)EDIS(-30.05)DR	4	2	-0.5374	1221400	359910	0	0	0	0	0	435340	822070	1179900	840600	839100	997070	718740	844740	469630	732440	0	915	915	1651	1794	23441;23442;23443;23444;23445;23446;23447;23448;23449;23450;23451;23452	23661;23662;23663	23441	23661	Service_Sonenberg_150119_10
P53762	77	P53762	P53762	Aryl hydrocarbon receptor nuclear translocator	Arnt		0.998732	29.2518	1.1886e-06	72.21	61.355	72.21	1	S	CDDDQMCNDKERFARSDDEQSSADKERLARE	X;X;X;X;X;X;X;X;X;X;X;X;X;X;X;Phospho (STY);X;X;X;X;X;X;X;X;X;X;X;X;X;X;X	XXXXXXXXXXXXPPPPPPPPPPPPPPPXXXX	FARS(0.999)DDEQS(0.001)SADKER	FARS(29.25)DDEQS(-29.25)S(-40.89)ADKER	4	3	-0.030108	1266600	556080	0	0	0	1004800	2127900	0	0	0	0	670750	0	0	0	1138900	0	0	77	77	791	862	11162;11163;11164;11165;11166;11167	11859;11860	11163	11860	Service_Sonenberg_150119_7
P53986	213	P53986	P53986	Monocarboxylate transporter 1	Slc16a1		0.999418	32.3458	0.00381843	61.194	42.687	56.91	1	S	IGPEQVKLEKLKSKESLQEAGKSDANTDLIG	X;X;X;X;X;X;X;X;X;X;X;X;X;X;X;Phospho (STY);X;X;X;X;X;X;X;X;X;X;X;X;X;X;X	XXXXXXXXXXXXPPPPPPPPPPXXXXXXXXX	S(0.001)KES(0.999)LQEAGK	S(-32.35)KES(32.35)LQEAGK	4	2	-0.52246	1145800	0	0	0	0	0	0	0	0	0	0	0	907520	1680500	701440	660510	0	428260	213	213	2605	2868	37420;37421;37422;37423;37424;37425;37426;37427	37588;37589;37590;37591;37592;37593;37594	37420	37588	Service_Sonenberg_150119_1
P54116	7	P54116	P54116	Erythrocyte band 7 integral membrane protein	Stom		0.974386	15.869	1.63681e-31	92.457	73.246	92.457	1	S	_________MSDKRQSSHVQSQRIPESFREN	X;X;X;X;X;X;X;X;X;X;X;X;X;X;X;Phospho (STY);X;X;X;X;X;X;X;X;X;X;X;X;X;X;X	XXXXXXXXXXPPPPPPPPPPPPPXXXXXXXX	SDKRQS(0.974)S(0.025)HVQSQR	S(-34.39)DKRQS(15.87)S(-15.87)HVQS(-44.54)QR	6	2	0.05015	0	267220	4791800	1462800	0	930890	0	394740	2595900	1312600	1080500	581150	2319800	0	0	867770	0	0	7	7	2015;2250;2423	2218;2472;2665	32030;32031;32032;32033;32034;32035;32036;32037;32038;32039;32040;32041;32042;32043;32044;32045;34898;34899;34900;34903;34904;34905;34906;34907;34909;34911;34912;34913	31551;31552;31553;31554;31555;34790;34791;34792;34795;34796;34797;34798;34799;34800;34802	34903	34795	Service_Sonenberg_150119_9
P54116	8	P54116	P54116	Erythrocyte band 7 integral membrane protein	Stom		0.648895	3.70342	1.01857e-05	83.54	73.164	83.54	1	S	________MSDKRQSSHVQSQRIPESFRENS	X;X;X;X;X;X;X;X;X;X;X;X;X;X;X;Phospho (STY);X;X;X;X;X;X;X;X;X;X;X;X;X;X;X	XXXXXXXXXPPPPPPPPPPPPPXXXXXXXXX	S(0.075)DKRQS(0.277)S(0.649)HVQSQR	S(-9.4)DKRQS(-3.7)S(3.7)HVQS(-69.26)QR	7	3	0.38011	0	0	0	8905600	0	0	0	3489600	0	0	0	0	0	0	0	0	0	0	8	8	2015;2250;2423	2218;2472;2665	28640;34897;34902	28084;34789;34794	34902	34794	Service_Sonenberg_150119_8
P54116	12	P54116	P54116	Erythrocyte band 7 integral membrane protein	Stom		0.998877	30.5115	0.00279806	80.706	52.497	80.706	1	S	____MSDKRQSSHVQSQRIPESFRENSKTEL	X;X;X;X;X;X;X;X;X;X;X;X;X;X;X;Phospho (STY);X;X;X;X;X;X;X;X;X;X;X;X;X;X;X	XXXXXXXXXPPPPPPPPPXXXXXXXXXXXXX	QSS(0.001)HVQS(0.999)QR	QS(-36.28)S(-30.51)HVQS(30.51)QR	7	2	-0.019023	1789500	926630	0	0	0	0	3929800	0	4620700	0	0	1351700	0	0	613330	0	850220	569750	12	12	2015;2250;2423	2218;2472;2665	28639;28641;28642;28643;28644;28645;28646;28647	28083;28085	28639	28083	Service_Sonenberg_150119_7
P54116	2	P54116	P54116	Erythrocyte band 7 integral membrane protein	Stom		0.975475	16.1794	3.87151e-05	67.726	58.438	67.726	1	S	______________MSDKRQSSHVQSQRIPE	X;X;X;X;X;X;X;X;X;X;X;X;X;X;X;Phospho (STY);X;X;X;X;Phospho (STY);Phospho (STY);X;X;X;Phospho (STY);X;X;X;X;X	XXXXXXXXXXXXXXXPPPPPPPPPPPPPXXX	S(0.975)DKRQS(0.024)S(0.001)HVQSQR	S(16.18)DKRQS(-16.18)S(-30.13)HVQS(-41.6)QR	1	2	0.35275	925170	0	0	0	0	0	1914400	0	0	0	0	0	0	0	0	0	0	0	2	2	2423	2665	34895;34901	34786;34793	34895	34786	Service_Sonenberg_150119_1
P54227	16	P54227	P54227	Stathmin	Stmn1		1	66.164	1.6003e-05	70.555	65.276	70.555	1	S	MASSDIQVKELEKRASGQAFELILSPRSKES	X;X;X;X;X;X;X;X;X;X;X;X;X;X;X;Phospho (STY);X;X;X;X;X;X;X;X;X;X;X;X;X;X;X	XXXXXXXXXXXXXPPPPPPPPPPPPPPXXXX	RAS(1)GQAFELILSPR	RAS(66.16)GQAFELILS(-66.16)PR	3	3	0.43016	0	308370	0	0	0	0	0	0	0	0	0	39019	0	0	0	0	0	49808	16	16	261;2040	286;2245	29019;29020;29021	28419	29019	28419	Service_Sonenberg_150119_2
P54227	25	P54227	P54227	Stathmin	Stmn1		0.999867	38.7715	0.0011186	42.789	26.564	42.789	1	S	ELEKRASGQAFELILSPRSKESVPDFPLSPP	X;X;X;X;X;X;X;X;X;X;X;X;X;X;X;Phospho (STY);X;X;X;X;X;X;X;X;X;X;X;X;X;X;X	XXXXXPPPPPPPPPPPPPXXXXXXXXXXXXX	ASGQAFELILS(1)PR	AS(-38.77)GQAFELILS(38.77)PR	11	2	0.75247	0	0	308980	2853700	1925600	936980	0	0	0	469300	0	0	0	0	0	640630	1183700	0	25	25	261;2040	286;2245	3880;3881;3882;3883;3884;3885;3886	4094;4095;4096;4097;4098;4099;4100;4101;4102;4103;4104	3882	4101	Service_Sonenberg_150119_10
P54310	557	P54310	P54310	Hormone-sensitive lipase	Lipe		0.49996	0	8.26922e-05	40.962	33.418	40.962	1	S	SPTAESVRPTESMRRSVSEAALAQPEGLLGT	X;X;X;X;X;X;X;X;X;X;X;X;X;X;X;Phospho (STY);X;X;X;X;X;X;X;X;X;X;X;X;X;X;X	XXXXXXXXXXXXXXXPPPPPPPPPPPPPPPP	S(0.5)VS(0.5)EAALAQPEGLLGTDTLK	S(0)VS(0)EAALAQPEGLLGT(-40.96)DT(-40.96)LK	1	2	2.2071	777730	0	0	0	0	0	0	0	0	0	0	0	0	0	0	0	0	0	557	557	2984	3282	43207	44047	43207	44047	Service_Sonenberg_150119_1
P54310	559	P54310	P54310	Hormone-sensitive lipase	Lipe		0.49996	0	8.26922e-05	40.962	33.418	40.962	1	S	TAESVRPTESMRRSVSEAALAQPEGLLGTDT	X;X;X;X;X;X;X;X;X;X;X;X;X;X;X;X;X;X;X;X;X;X;X;X;X;X;X;X;X;X;X	XXXXXXXXXXXXXXXXXXXXXXXXXXXXXXX	S(0.5)VS(0.5)EAALAQPEGLLGTDTLK	S(0)VS(0)EAALAQPEGLLGT(-40.96)DT(-40.96)LK	3	2	2.2071	777730	0	0	0	0	0	0	0	0	0	0	0	0	0	0	0	0	0	559	559	2984	3282	43207	44047	43207	44047	Service_Sonenberg_150119_1
P54731	269	P54731	P54731	FAS-associated factor 1	Faf1		0.975147	17.3541	0.00255151	71.221	8.7581	70.908	1	S	GLSYPCHRLTVGRRTSPVQTREQSEEQSTDV	X;X;X;X;X;X;X;X;X;X;X;X;X;X;X;Phospho (STY);X;X;X;X;X;X;X;X;X;X;X;X;X;X;X	XXXXXXXXXXXXXPPPPPPPPXXXXXXXXXX	RT(0.007)S(0.975)PVQT(0.018)R	RT(-21.49)S(17.35)PVQT(-17.35)R	3	2	0.41699	0	1214500	0	0	0	1133700	5293800	790700	0	0	2555100	1480100	2818000	4019200	1924800	1057700	2306000	968290	269	269	2337	2566	33423;33426;33427;33429;33430;33431;33432;33433;33434;33435;33436;33437;33438;33439;33440;33441;33442;33443;33444	32909;32912;32913;32915;32916	33427	32913	Service_Sonenberg_150119_10
P55194	456	P55194	P55194	SH3 domain-binding protein 1	Sh3bp1		0.951754	12.9519	1.03748e-05	75.143	63.085	52.862	1	S	MAVRERTEADLPKPTSPKVSRNPTETAASAE	X;X;X;X;X;X;X;X;X;X;X;X;X;X;X;Phospho (STY);X;X;X;X;X;X;X;X;X;X;X;X;X;X;X	XXXXPPPPPPPPPPPPPPXXXXXXXXXXXXX	ERTEADLPKPT(0.048)S(0.952)PK	ERT(-48.31)EADLPKPT(-12.95)S(12.95)PK	12	3	0.11178	41630000	34829000	0	0	0	30712000	36029000	43027000	38522000	45786000	0	29179000	0	0	0	0	46466000	0	456	456	738;3058	804;3365	10343;10344;10346;10347;10348;10351;10352;10353;10354;10355;10356;10358;10359;10360;10361;10362;10364;10365;10366;10367;44220	11092;11093;11094;11095;11098;11099;11100;11101;11104;11105;11106;11107;11108;11109;11110;11111;11112;11113;11115;11116;11117;11118;11119;11120;11121;45104	10348	11101	Service_Sonenberg_150119_6
P55258	181	P55258	P55258	Ras-related protein Rab-8A	Rab8a		0.999974	45.0658	2.88034e-05	61.444	46.77	61.444	1;2	S	ARDIKAKMDKKLEGNSPQGSSHGVKITVEQQ	X;X;X;X;X;X;X;X;X;X;X;X;X;X;X;Phospho (STY);X;X;X;Phospho (STY);X;X;X;X;X;X;X;X;X;X;X	XXXXXXXXXXXPPPPPPPPPPPPPPXXXXXX	LEGNS(1)PQGS(0.822)S(0.178)HGVK	LEGNS(45.07)PQGS(6.63)S(-6.63)HGVK	5	2	-0.45218	884760	0	0	0	0	1505700	0	0	0	947520	0	0	3009400	1316000	606560	579160	815750	617220	181	181	1375;1556	1493;1692;1693	22244;22251;22258;22259;22260;22261;22262;22263;22264;22265;22266	22693;22703;22704;22709	22258	22709	Service_Sonenberg_150119_1
P55258	185	P55258	P55258	Ras-related protein Rab-8A	Rab8a		0.862783	7.98863	3.63715e-06	92.457	69.737	92.457	1;2	S	KAKMDKKLEGNSPQGSSHGVKITVEQQKRTS	X;X;X;X;X;X;X;X;X;X;X;Phospho (STY);X;X;X;Phospho (STY);X;X;X;X;X;X;X;X;X;X;X;X;X;X;X	XXXXXXPPPPPPPPPPPPPPPXXXXXXXXXX	LEGNSPQGS(0.863)S(0.137)HGVK	LEGNS(-38.7)PQGS(7.99)S(-7.99)HGVK	9	2	-0.32552	2862200	721310	4003700	0	0	565890	0	0	1409100	3482400	1573800	1060700	963380	1316000	606560	2099600	815750	2207500	185	185	1375;1556	1493;1692;1693	22242;22247;22248;22249;22250;22253;22255;22256;22257;22258;22259;22260;22261;22262;22263;22264;22265;22266	22690;22698;22699;22700;22701;22702;22706;22708;22709	22242	22690	Service_Sonenberg_150119_1
P55258	186	P55258	P55258	Ras-related protein Rab-8A	Rab8a		0.624081	2.20498	4.61215e-06	70.373	47.255	70.373	1	S	AKMDKKLEGNSPQGSSHGVKITVEQQKRTSF	X;X;X;X;X;X;X;X;X;X;X;X;X;X;X;Phospho (STY);X;X;X;X;X;X;X;X;X;X;X;X;X;X;X	XXXXXXPPPPPPPPPPPPPPXXXXXXXXXXX	LEGNSPQGS(0.376)S(0.624)HGVK	LEGNS(-33.12)PQGS(-2.2)S(2.2)HGVK	10	2	-1.6672	0	0	0	0	0	0	0	531080	0	0	0	0	0	0	0	0	1443300	0	186	186	1375;1556	1493;1692;1693	22246;22254	22697;22707	22254	22707	Service_Sonenberg_150119_17
P55302	53	P55302	P55302	Alpha-2-macroglobulin receptor-associated protein	Lrpap1		1	54.2757	0.000358892	114.89	51.818	54.276	1	S	YSREKNEPEMAAKRESGEEFRMEKLNQLWEK	X;X;X;X;X;X;X;X;X;X;X;X;X;X;X;Phospho (STY);X;X;X;X;X;X;X;X;X;X;X;X;X;X;X	XXXXXXXXXXXXXPPPPPPPPPPPXXXXXXX	RES(1)GEEFRMEK	RES(54.28)GEEFRMEK	3	3	0.21336	5073000	1000100	4620400	2344700	1746400	1292000	4934500	1080100	2661000	2310700	2493900	2764600	4246900	5510700	3450900	760070	3108200	1468500	53	53	2078;2079	2284;2285	29517;29518;29519;29520;29521;29522;29523;29524;29525;29526;29527;29528;29529;29530;29531;29532;29533;29534;29535;29536;29537;29538;29539;29540;29541;29542;29543;29544;29545;29546;29547;29548;29549;29550;29551;29552;29553;29554;29555;29556;29557;29558;29559;29560;29561;29562;29563;29564;29565;29566;29567;29568	28918;28919;28920;28921;28922;28923;28924;28925;28926;28927;28928;28929;28930;28931;28932;28933;28934;28935;28936;28937;28938;28939;28940;28941;28942;28943;28944;28945;28946;28947;28948;28949;28950;28951;28952;28953;28954;28955;28956;28957;28958;28959;28960;28961;28962	29553	28962	Service_Sonenberg_150119_18
P55937	1479	P55937	P55937	Golgin subfamily A member 3	Golga3		1	45.2798	0.000422107	47.606	30.49	45.28		S	EHAHPRGDTKLHNQNSVPRDGLGQ_______	X;X;X;X;X;X;X;X;X;X;X;X;X;X;X;Phospho (STY);X;X;X;X;X;X;X;X;X;X;X;X;X;X;X	XXXXXXXXXXPPPPPPPPPPPPPPXXXXXXX	LHNQNS(1)VPRDGLGQ	LHNQNS(45.28)VPRDGLGQ	6	2	-0.21632	0	0	0	0	0	0	0	0	0	1434400	732920	0	0	0	0	1117900	1176100	1160900	1479	1479	1589	1727	22706;22707;22708;22709;22710	23030;23031	22707	23031	Service_Sonenberg_150119_16
P56183	434	P56183	P56183	Ribosomal RNA processing protein 1 homolog A	Rrp1		1	91.2694	4.28572e-59	144.18	120.7	128.71	1	S	KKRLPKPQPQNKEAGSEAESSSADPGPGRKR	X;X;X;X;X;X;X;X;X;X;X;X;X;X;X;Phospho (STY);X;X;X;X;X;X;X;X;X;X;X;X;X;X;X	XXXXXXXXXXXXPPPPPPPPPPPPPPPPPPX	EAGS(1)EAESSSADPGPGR	EAGS(91.27)EAES(-91.27)S(-95.79)S(-100.16)ADPGPGR	4	2	-0.23868	8888700	1850200	4555700	6750100	2934500	2979100	12122000	2677300	5790000	5401500	6170100	3850700	5762300	7157200	4537900	3078900	4492200	4997300	434	434	573;574	626;627	8063;8064;8065;8066;8067;8068;8069;8070;8071;8072;8073;8074;8075;8076;8077;8078;8079;8080;8081;8082;8083;8084;8085;8086;8087	8900;8901;8902;8903;8904;8905;8906;8907;8908;8909;8910;8911;8912;8913;8914;8915;8916;8917;8918;8919;8920;8921;8922;8923;8924;8925;8926;8927;8928;8929;8930;8931;8932;8933;8934;8935;8936;8937;8938;8939;8940;8941;8942;8943;8944;8945;8946;8947	8078	8940	Service_Sonenberg_150119_15
P56695	158	P56695	P56695	Wolframin	Wfs1		0.797795	5.96101	0.00175691	59.198	26.11	59.198	1	S	VKLLRRCLADRKGITSENEAEVKQLSSETDL	X;X;X;X;X;X;X;X;X;X;X;X;X;X;X;Phospho (STY);X;X;X;X;X;X;X;X;X;X;X;X;X;X;X	XXXXXXXXXXXXPPPPPPPPPPPXXXXXXXX	GIT(0.202)S(0.798)ENEAEVK	GIT(-5.96)S(5.96)ENEAEVK	4	2	-0.11383	2038500	249780	0	0	0	872090	1355800	330320	1127700	1937700	1149300	1299600	1710200	0	1662400	1292300	1340600	861470	158	158	922	999	12859;12860;12861;12862;12863;12864;12865;12866;12867;12868;12869;12870;12871;12872	13420	12859	13420	Service_Sonenberg_150119_1
P56695	236	P56695	P56695	Wolframin	Wfs1		0.990211	20.0498	3.02709e-17	146.03	16.309	146.03	1	S	PKSLQKQRRMLERLVSSESKNYIALDDFVEL	X;X;X;X;X;X;X;X;X;X;X;X;X;X;X;Phospho (STY);X;X;X;X;X;X;X;X;X;X;X;X;X;X;X	XXXXXXXXXXXXXPPPPPPPXXXXXXXXXXX	LVS(0.99)S(0.01)ESK	LVS(20.05)S(-20.05)ES(-85.14)K	3	1	-0.19646	0	2856000	16854000	104370000	71322000	26625000	0	1344900	0	104770000	57165000	54994000	10467000	17418000	0	61253000	0	34050000	236	236	1692	1837	23912;23913;23914;23915;23917;23918;23919;23920;23921;23922;23923;23924;23925;23926;23927;23928;23929;23930;23931;23932;23933;23934	24012;24013;24014;24015;24016;24017;24018;24019;24020;24022;24023;24024;24025;24026;24027;24028;24029;24030;24031;24032;24033;24034;24035;24036	23912	24012	Service_Sonenberg_150119_1
P56695	237	P56695	P56695	Wolframin	Wfs1		0.466421	0	0.0238498	49.442	13.823	49.442		S	KSLQKQRRMLERLVSSESKNYIALDDFVELT	X;X;X;X;X;X;X;X;X;X;X;X;X;X;X;X;X;X;X;X;X;X;X;X;X;X;X;X;X;X;X	XXXXXXXXXXXXXXXXXXXXXXXXXXXXXXX	LVS(0.466)S(0.466)ES(0.067)K	LVS(0)S(0)ES(-8.42)K	4	2	0.31056	0	0	0	0	0	0	0	0	0	0	0	0	0	0	0	0	0	0	237	237	1692	1837			23916	24021	Service_Sonenberg_150119_9
P56695	3	P56695	P56695	Wolframin	Wfs1		0.520584	0.734088	8.0751e-08	41.136	32.427	40.381	2	S	_____________MNSGTPPPSPSGPPPPPA	X;X;X;X;X;X;X;X;X;X;X;X;X;Oxidation (M);X;Phospho (STY);X;Phospho (STY);X;X;X;X;X;X;X;X;X;X;X;X;X	XXXXXXXXXXXXXPPPPPPPPPPPPPPPPPP	MNS(0.521)GT(0.44)PPPS(0.02)PS(0.02)GPPPPPAPQPQAR	MNS(0.73)GT(-0.73)PPPS(-14.18)PS(-14.18)GPPPPPAPQPQAR	3	3	1.1936	1058700	0	0	0	0	932800	0	0	0	7982800	0	0	0	764700	1353200	12253000	0	0	3	3	1732	1891;1892	24454;24455;24456;24457;24458;24459	24410;24411;24412	24455	24411	Service_Sonenberg_150119_6
P56695	9	P56695	P56695	Wolframin	Wfs1		0.5	0	7.32762e-07	40.012	36.279	40.012	2	S	_______MNSGTPPPSPSGPPPPPAPQPQAR	X;X;X;X;X;X;X;X;X;X;X;X;X;X;X;X;X;X;X;X;X;X;X;X;X;X;X;X;X;X;X	XXXXXXXXXXXXXXXXXXXXXXXXXXXXXXX	MNS(0.5)GT(0.5)PPPS(0.5)PS(0.5)GPPPPPAPQPQAR	MNS(0)GT(0)PPPS(0)PS(0)GPPPPPAPQPQAR	9	3	-0.97949	0	0	0	0	0	0	0	0	0	7982800	0	0	0	764700	1353200	12253000	0	0	9	9	1732	1891;1892	24456;24457;24458;24459	24412	24456	24412	Service_Sonenberg_150119_16
P56695	11	P56695	P56695	Wolframin	Wfs1		0.5	0	7.32762e-07	40.012	36.279	40.012	2	S	_____MNSGTPPPSPSGPPPPPAPQPQARAR	X;X;X;X;X;X;X;X;X;X;X;X;X;X;X;X;X;X;X;X;X;X;X;X;X;X;X;X;X;X;X	XXXXXXXXXXXXXXXXXXXXXXXXXXXXXXX	MNS(0.5)GT(0.5)PPPS(0.5)PS(0.5)GPPPPPAPQPQAR	MNS(0)GT(0)PPPS(0)PS(0)GPPPPPAPQPQAR	11	3	-0.97949	0	0	0	0	0	0	0	0	0	7982800	0	0	0	764700	1353200	12253000	0	0	11	11	1732	1891;1892	24456;24457;24458;24459	24412	24456	24412	Service_Sonenberg_150119_16
P56812	119	P56812	P56812	Programmed cell death protein 5	Pdcd5		1	93.575	1.69327e-15	118.37	111.71	118.37	1	S	EKKTTVKFNRRKVMDSDEDDADY________	X;X;X;X;X;X;X;X;X;X;X;X;X;Oxidation (M);X;Phospho (STY);X;X;X;X;X;X;X;X;X;X;X;X;X;X;X	XXXXXXXXXXPPPPPPPPPPPPPXXXXXXXX	RKVMDS(1)DEDDADY	RKVMDS(93.58)DEDDADY(-93.58)	6	2	0.22263	7027700	337830	1762200	5080200	4369600	1434500	1441800	4037100	1300500	4981000	1077400	1082000	3142100	2437400	6685100	0	9433800	0	119	119	1500;2156	1630;1631;2372	21438;21439;21440;21441;21442;21443;21444;21445;21446;21447;21448;21449;21450;21451;21452;21453;21454;21455;21456;21457;21458;21459;21460;21461;21462;21463;21464;21465;21466;21467;21468;21469;21470;21471;21472;21473;21474;21475;21476;21477;21478;30657;30658;30659;30660;30661;30662;30663;30664;30665;30666;30667;30668;30669;30670;30671;30672;30673	21874;21875;21876;21877;21878;21879;21880;21881;21882;21883;21884;21885;21886;21887;21888;21889;21890;21891;21892;21893;21894;21895;21896;21897;21898;21899;21900;21901;21902;21903;21904;21905;21906;21907;21908;21909;21910;21911;21912;21913;21914;21915;21916;21917;21918;21919;21920;21921;21922;21923;21924;21925;21926;21927;21928;21929;21930;21931;21932;21933;21934;21935;21936;21937;21938;21939;219…	30657	30066	Service_Sonenberg_150119_1
P57776	133	P57776	P57776	Elongation factor 1-delta	Eef1d		0.999999	59.6215	4.37766e-19	127.79	106.05	127.79	1	S	SSPTPRATAPQTQHVSPMRQVEPPTKKGATP	X;X;X;X;X;X;X;X;X;X;X;X;X;X;X;Phospho (STY);X;Oxidation (M);X;X;X;X;X;X;X;X;X;X;X;X;X	XXXXXXPPPPPPPPPPPPPXXXXXXXXXXXX	ATAPQTQHVS(1)PMR	AT(-92.38)APQT(-59.62)QHVS(59.62)PMR	10	2	0.19307	5192800	1525700	6168200	4608500	2916900	1953200	7518400	2291000	5112100	6126800	4718600	3065400	2859600	9586900	2010800	2396800	6344300	3627300	133	133	300	334;335	4588;4589;4590;4591;4592;4593;4594;4595;4596;4597;4598;4599;4600;4601;4602;4603;4604;4605;4606;4607;4608;4609;4610;4611;4612;4613;4614;4615;4616;4617;4618;4619;4620;4621;4622;4623;4624;4625;4626;4627;4628;4629;4630;4631;4632;4633	5685;5686;5687;5688;5689;5690;5691;5692;5693;5694;5695;5696;5697;5698;5699;5700;5701;5702;5703;5704;5705;5706;5707;5708;5709;5710;5711;5712;5713;5714;5715;5716;5717;5718;5719;5720;5721;5722;5723;5724;5725;5726;5727;5728;5729;5730;5731;5732;5733;5734;5735;5736;5737;5738;5739;5740;5741;5742	4612	5706	Service_Sonenberg_150119_8
P57776	162	P57776	P57776	Elongation factor 1-delta	Eef1d		0.994787	22.8066	6.73692e-23	57.417	53.343	54.703	1	S	TPAEDDEDKDIDLFGSDEEEEDKEAARLREE	X;X;X;X;X;X;X;X;X;X;X;X;X;X;X;Phospho (STY);X;X;X;X;X;X;X;X;X;X;X;X;X;X;X	PPPPPPPPPPPPPPPPPPPPPPPPPPPXXXX	GAT(0.005)PAEDDEDKDIDLFGS(0.995)DEEEEDKEAAR	GAT(-22.81)PAEDDEDKDIDLFGS(22.81)DEEEEDKEAAR	18	3	-0.23544	0	369100000	403550000	0	0	321030000	321740000	0	225130000	176220000	147430000	221720000	0	300810000	0	0	0	0	162	162	857	931	11992;11993;11994;11995;11996;11997;11998;11999;12000	12534;12535	11993	12535	Service_Sonenberg_150119_3
P57787	430	P57787	P57787	Monocarboxylate transporter 4	Slc16a3		0.999829	37.669	0.00020712	42.639	34.039	42.639	1	S	GKRKRPEVTEPEEVASEEKLHKPPVDVGVDS	X;X;X;X;X;X;X;X;X;X;X;X;X;X;X;Phospho (STY);X;X;X;X;X;X;X;X;X;X;X;X;X;X;X	XXXPPPPPPPPPPPPPPPPXXXXXXXXXXXX	KRPEVTEPEEVAS(1)EEK	KRPEVT(-37.67)EPEEVAS(37.67)EEK	13	3	-0.15409	0	472860	0	0	0	0	968660	736970	630810	0	0	0	0	943170	829740	0	0	0	430	430	1447	1571	20592;20593;20594;20595;20596;20597	21073;21074	20593	21074	Service_Sonenberg_150119_14
P58058	64	P58058	P58058	NAD kinase	Nadk		0.999232	32.4433	0.00014523	44.998	40.107	44.998	1	S	ASPALGSTKEFRRTRSLHGPCPVTTFGPKAC	X;X;X;X;X;X;X;X;X;X;X;X;X;X;X;Phospho (STY);X;X;X;X;X;X;X;X;X;X;X;X;X;X;X	XXXXXXXXXXXXXXXPPPPPPPPPPPPPPXX	S(0.999)LHGPCPVT(0.001)TFGPK	S(32.44)LHGPCPVT(-32.44)T(-37.02)FGPK	1	3	0.33276	300140	240640	0	386110	571260	392030	203390	347990	224120	505570	155710	0	205240	0	198450	0	0	0	64	64	2641;3182	2906;3501	37929;37930;37931;37932;37933;37934;37935;37936;37937;37938;37939;37940	38181	37929	38181	Service_Sonenberg_150119_10
P58058	46	P58058	P58058	NAD kinase	Nadk		0.946122	14.9135	1.51061e-19	91.789	74.568	77.359	1	S	TWSYNHPIRGRAKSRSLSASPALGSTKEFRR	X;X;X;X;X;X;X;X;X;X;X;X;X;X;X;Phospho (STY);X;X;X;X;X;X;X;X;X;X;X;X;X;X;X	XXXXXXXXXXXXXPPPPPPPPPPPPPPXXXX	S(0.031)RS(0.946)LS(0.02)AS(0.004)PALGSTK	S(-14.91)RS(14.91)LS(-16.85)AS(-23.96)PALGS(-48.78)T(-53.93)K	3	2	-0.11239	0	0	526920	1070800	1330700	0	0	1039700	1262900	2155700	0	0	1020700	0	0	0	2109400	0	46	46	2651;2807	2917;3089	38061;38062;38064;38065;38067;38069;38075;40351;40352;40354;40355;40356;40357;40360;40364	38276;38277;38279;38280;38282;38284;38285;38293;40691;40692;40694;40695;40696;40697;40698;40702;40703	40354	40694	Service_Sonenberg_150119_8
P58058	48	P58058	P58058	NAD kinase	Nadk		0.996094	26.8311	9.62146e-06	91.812	75.039	66.393	1	S	SYNHPIRGRAKSRSLSASPALGSTKEFRRTR	X;X;X;X;X;X;X;X;X;X;X;X;X;X;X;Phospho (STY);X;X;X;X;X;X;X;X;X;X;X;X;X;Phospho (STY);X	XXXXXXXXXXXPPPPPPPPPPPPPPXXXXXX	S(0.002)LS(0.996)AS(0.002)PALGSTK	S(-26.83)LS(26.83)AS(-27.39)PALGS(-49.62)T(-49.62)K	3	2	-0.018689	1368300	0	0	0	2299600	1544200	2352600	1702800	1738800	0	1020300	1701400	1680500	0	1384800	0	3229800	0	48	48	2651;2807	2917;3089	38063;38066;38068;38070;38071;38072;38073;38074;38076;38077;38078;38079;38080;40359;40362;40363;40365;40366;40367;40368	38278;38281;38283;38286;38287;38288;38289;38290;38291;38292;40700;40701	38066	38281	Service_Sonenberg_150119_7
P58058	44	P58058	P58058	NAD kinase	Nadk		0.616326	2.17854	1.2962e-05	87.647	70.061	87.647	1	S	DETWSYNHPIRGRAKSRSLSASPALGSTKEF	X;X;X;X;X;X;X;X;X;X;X;X;X;X;X;Phospho (STY);X;Phospho (STY);X;Phospho (STY);X;X;X;X;X;X;X;X;X;X;X	XXXXXXXXXXXXXXXPPPPPPPPPPPPPPXX	S(0.616)RS(0.373)LS(0.008)AS(0.003)PALGSTK	S(2.18)RS(-2.18)LS(-18.9)AS(-23.89)PALGS(-74.5)T(-81.03)K	1	2	-0.0073455	0	0	0	0	0	0	2644100	0	0	0	0	0	0	0	0	0	0	1240900	44	44	2807	3089	40353;40361	40693;40704;40705	40361	40704	Service_Sonenberg_150119_18
P58283	707	P58283	P58283	E3 ubiquitin-protein ligase RNF216	Rnf216		0.999995	52.9596	0.000105075	54.343	44.017	54.343	1	S	RVSINGYDHFCQHPRSPGAPCQECSRCSLWT	X;X;X;X;X;X;X;X;X;X;X;X;X;X;X;Phospho (STY);X;X;X;X;X;X;X;X;X;X;X;X;X;X;X	XXXXXXXXXXXXXXXPPPPPPPPPPPXXXXX	S(1)PGAPCQECSR	S(52.96)PGAPCQECS(-52.96)R	1	2	-0.44485	0	0	0	0	0	0	0	0	0	0	0	0	0	0	0	0	0	0	707	707	2708	2981	38967	39207	38967	39207	Service_Sonenberg_150119_10
P58501	264	P58501	P58501	PAX3- and PAX7-binding protein 1	Paxbp1		1	73.9284	3.68906e-19	91.733	81.775	73.928	1	S	EPGKGRLVREDENDASDDEDDDEKRRIVFSV	X;X;X;X;X;X;X;X;X;X;X;X;X;X;X;Phospho (STY);X;X;X;X;X;X;X;X;X;X;X;X;X;X;X	XXXXXXPPPPPPPPPPPPPPPPPPPXXXXXX	LVREDENDAS(1)DDEDDDEKR	LVREDENDAS(73.93)DDEDDDEKR	10	3	-0.77333	11810000	693440	3235400	0	0	5744000	11979000	1991200	4242600	7998000	6906700	4149900	7613400	10976000	5930900	5967000	7867100	7762500	264	264	1689	1834	23868;23869;23870;23871;23872;23873;23874;23875;23876;23877;23878;23879;23880;23881;23882;23883;23884	23990;23991;23992;23993;23994;23995;23996;23997;23998;23999;24000;24001;24002;24003;24004;24005	23877	24004	Service_Sonenberg_150119_17
P58801	356	P58801	P58801	Receptor-interacting serine/threonine-protein kinase 2	Ripk2		0.999879	41.4946	0.00313019	69.672	49.682	69.672	1	S	QEESCGSSLLSRNTGSPGPSRSLSAPQDKGF	X;X;X;X;X;X;X;X;X;X;X;X;X;X;X;Phospho (STY);X;X;X;X;X;X;X;Phospho (STY);X;X;X;X;X;X;X	XXXXXXXXXXXXPPPPPPPPPXXXXXXXXXX	NTGS(1)PGPSR	NT(-42.97)GS(41.49)PGPS(-41.49)R	4	2	1.2447	6591000	3042300	0	0	0	567240	0	2386600	8633900	6803200	3312200	3253000	3601000	0	2021100	1698200	1825400	0	356	356	1890	2079	27009;27010;27011;27012;27013;27014;27015;27016;27017;27018;27019;27020	26696;26697;26698	27010	26697	Service_Sonenberg_150119_12
P58801	364	P58801	P58801	Receptor-interacting serine/threonine-protein kinase 2	Ripk2		0.999215	31.0468	0.00403367	78.264	60.569	55.898	1	S	LLSRNTGSPGPSRSLSAPQDKGFLSGAPQDC	X;X;X;X;X;X;X;Phospho (STY);X;X;X;X;X;X;X;Phospho (STY);X;X;X;X;X;X;X;X;X;X;X;X;X;X;X	XXXXXXXXXXXXXPPPPPPPPXXXXXXXXXX	S(0.001)LS(0.999)APQDK	S(-31.05)LS(31.05)APQDK	3	2	-0.8957	2573200	1220200	1718700	3236100	2996700	2643300	0	842810	1560400	4596500	3908000	3326800	2314200	1855900	2340300	2240100	4921800	1528100	364	364	2650	2916	38044;38045;38046;38047;38048;38049;38050;38051;38052;38053;38054;38055;38056;38057;38058;38059;38060	38263;38264;38265;38266;38267;38268;38269;38270;38271;38272;38273;38274;38275	38046	38267	Service_Sonenberg_150119_11
P58871	911	P58871	P58871	182 kDa tankyrase-1-binding protein	Tnks1bp1		0.704111	6.5923	2.16172e-06	56.055	46.597	56.055	1	S	ENDQELGMKNLSRGYSSQDAEEQDREFEKRD	X;X;X;X;X;X;X;X;X;X;X;X;X;X;X;Phospho (STY);X;X;X;X;X;X;X;X;X;X;X;X;X;X;X	XXXXXXXXXXXXXPPPPPPPPPPPPPPPPPX	GY(0.154)S(0.704)S(0.142)QDAEEQDREFEKR	GY(-6.59)S(6.59)S(-6.97)QDAEEQDREFEKR	3	3	-0.44455	0	0	0	0	0	2644700	0	0	357150	0	2541600	4850500	0	0	0	4927000	6084800	3563100	911	911	1057	1141	14497;14498;14499;14500;14501;14502;14503	14958	14497	14958	Service_Sonenberg_150119_12
P58871	1657	P58871	P58871	182 kDa tankyrase-1-binding protein	Tnks1bp1		1	76.1191	1.28063e-147	182.57	94.85	158.89	1	S	LSPSALKAKLRSRNRSAEEGEVTESKSSQKE	X;X;X;X;X;X;X;X;X;X;X;X;X;X;X;Phospho (STY);X;X;X;X;X;X;X;X;X;X;X;X;X;X;X	XXXXXXXXXXXXXPPPPPPPPPPPPPXXXXX	NRS(1)AEEGEVTESK	NRS(76.12)AEEGEVT(-76.12)ES(-121.37)K	3	2	0.31885	3715400	1373300	1916400	4722300	3625300	2283800	5411000	1132000	2839600	5551200	3365600	1805700	2532500	3829800	2454200	4335800	3865000	2641900	1657	1657	1857	2042	26517;26518;26519;26520;26521;26522;26523;26524;26525;26526;26527;26528;26529;26530;26531;26532;26533;26534;26535	26329;26330;26331;26332;26333;26334;26335;26336;26337;26338;26339;26340;26341;26342;26343;26344;26345;26346;26347;26348;26349;26350;26351;26352;26353;26354;26355;26356;26357;26358;26359;26360	26525	26345	Service_Sonenberg_150119_8
P59017	387	P59017	P59017	Bcl-2-like protein 13	Bcl2l13		0.999018	30.0766	0.000114525	79.875	63.497	57.175	1	S	GAAQLSEERAGSRKKSHTGEAAAVRGAKSGL	X;X;X;X;X;X;X;X;X;X;X;X;X;X;X;Phospho (STY);X;X;X;X;X;X;X;X;X;X;X;X;X;X;X	XXXXXXXXXXXXXPPPPPPPPPPPPXXXXXX	KS(0.999)HT(0.001)GEAAAVR	KS(30.08)HT(-30.08)GEAAAVR	2	2	-0.69086	0	4102800	25648000	39994000	43889000	15125000	0	137540	0	2599500	0	0	3384100	11834000	3736400	6561100	14306000	14780000	387	387	1367;1459	1485;1586	19479;19480;19481;19482;19483;19484;19485;19486;19487;19488;19489;19490;19491;19492;19493;20805;20806;20807;20808;20809;20810;20811;20812;20813;20814;20815;20816;20817;20818;20819;20820;20821;20822;20823;20824;20825;20826;20827	19947;19948;19949;19950;19951;19952;19953;19954;19955;19956;21404;21405;21406;21407;21408;21409;21410;21411;21412;21413;21414;21415;21416;21417;21418;21419;21420;21421;21422;21423;21424;21425	20808	21407	Service_Sonenberg_150119_6
P59325	8	P59325	P59325	Eukaryotic translation initiation factor 5	Eif5		0.911434	10.1246	0.00385609	83.614	65.848	70.912	1	S	________MSVNVNRSVSDQFYRYKMPRLIA	X;X;X;X;X;X;X;X;X;X;X;X;X;X;X;Phospho (STY);X;X;X;X;X;X;X;X;X;X;X;X;X;X;X	XXXXXXXXXXXXXXXPPPPPPPPXXXXXXXX	S(0.911)VS(0.089)DQFYR	S(10.12)VS(-10.12)DQFY(-62.32)R	1	2	0.1009	0	0	0	963030	1227600	1145400	0	0	0	944450	0	0	0	0	0	0	1705300	1422900	8	8	2983	3281	43198;43199;43200;43201;43205;43206	44026;44027;44028;44029;44030;44031;44032;44033;44034;44041;44042;44043;44044;44045;44046	43206	44045	Service_Sonenberg_150119_18
P59325	10	P59325	P59325	Eukaryotic translation initiation factor 5	Eif5		0.931159	11.3177	0.00381463	72.138	54.372	47.198	1	S	______MSVNVNRSVSDQFYRYKMPRLIAKV	X;X;X;X;X;X;X;X;X;X;X;X;X;X;X;Phospho (STY);X;X;X;X;X;X;X;X;X;X;X;X;X;X;X	XXXXXXXXXXXXXPPPPPPPPXXXXXXXXXX	S(0.069)VS(0.931)DQFYR	S(-11.32)VS(11.32)DQFY(-39.97)R	3	2	-0.07624	0	0	0	0	0	0	0	0	0	0	448520	700790	0	0	0	1568300	0	0	10	10	2983	3281	43202;43203;43204	44035;44036;44037;44038;44039;44040	43202	44035	Service_Sonenberg_150119_11
P59672	903	P59672	P59672	Ankyrin repeat and SAM domain-containing protein 1A	Anks1a		0.999827	39.0908	0.000109876	53.395	42.377	53.395	1	S	DLLLPSADTSRRRHDSLPDPGTASRADRFRV	X;X;X;X;X;X;X;X;X;X;X;X;X;X;X;Phospho (STY);X;X;X;X;X;X;X;X;X;X;X;X;X;X;X	XXXXXXXXXXXPPPPPPPPPPPPPPXXXXXX	RHDS(1)LPDPGTASR	RHDS(39.09)LPDPGT(-39.09)AS(-43.02)R	4	3	0.1106	0	2821300	0	0	0	0	2718600	0	0	4510200	0	3804000	0	2867600	2665100	0	4329800	3315900	903	903	2119;2257	2329;2479	30134;30135;30136;30137;30138;30139;30140;30141;32098;32099	29507;29508;29509;29510;29511;29512;29513;29514;31589	30135	29509	Service_Sonenberg_150119_7
P59672	661	P59672	P59672	Ankyrin repeat and SAM domain-containing protein 1A	Anks1a		0.534995	0.624608	0.00134938	44.616	22.57	44.616	1	S	LLTCSPTEDATMGSRSESLSNCSIGKKRLEK	X;X;X;X;X;X;X;X;X;X;X;X;X;X;X;Phospho (STY);X;X;X;X;X;X;X;X;X;X;X;X;X;X;X	XXXXXXXXXXXXXXXPPPPPPPPPPPPXXXX	S(0.535)ES(0.463)LS(0.001)NCSIGKK	S(0.62)ES(-0.62)LS(-25.94)NCS(-32.33)IGKK	1	2	-0.56027	0	0	0	0	0	0	0	0	0	0	0	0	0	0	0	4986700	0	0	661	661	2459;2460	2702;2703	35372	35325	35372	35325	Service_Sonenberg_150119_16
P59672	663	P59672	P59672	Ankyrin repeat and SAM domain-containing protein 1A	Anks1a		0.999889	40.8819	1.18475e-05	100.04	45.253	100.04	1	S	TCSPTEDATMGSRSESLSNCSIGKKRLEKSP	X;X;X;X;X;X;X;X;X;X;X;X;X;X;X;Phospho (STY);X;X;X;X;X;X;X;X;X;X;X;X;X;X;X	XXXXXXXXXXXXXPPPPPPPPPPPPXXXXXX	SES(1)LSNCSIGKK	S(-40.88)ES(40.88)LS(-45.39)NCS(-74.34)IGKK	3	2	-0.28581	2353900	1216600	1326800	827250	831230	802250	3436800	1206100	2365600	1729200	984150	835690	2767200	1663600	2087000	0	1604200	762740	663	663	2459;2460	2702;2703	35338;35339;35340;35341;35342;35343;35344;35345;35346;35347;35348;35349;35350;35351;35352;35353;35354;35355;35356;35357;35358;35359;35360;35361;35362;35363;35364;35365;35366;35367;35368;35369;35370;35371;35373;35374;35375;35376	35272;35273;35274;35275;35276;35277;35278;35279;35280;35281;35282;35283;35284;35285;35286;35287;35288;35289;35290;35291;35292;35293;35294;35295;35296;35297;35298;35299;35300;35301;35302;35303;35304;35305;35306;35307;35308;35309;35310;35311;35312;35313;35314;35315;35316;35317;35318;35319;35320;35321;35322;35323;35324;35326;35327	35374	35327	Service_Sonenberg_150119_18
P59672	398	P59672	P59672	Ankyrin repeat and SAM domain-containing protein 1A	Anks1a		0.384988	0	3.04251e-05	50.752	41.469	45.413		S	NAVSCHSLDSTASGRSSDRDSMNKEAEATGT	X;X;X;X;X;X;X;X;X;X;X;X;X;X;X;Phospho (STY);X;X;X;X;X;X;X;X;X;X;X;X;X;X;X	XXXXXXXXXXXXXXXPPPPPPPPPPPPPPPP	S(0.385)S(0.385)DRDS(0.23)MNKEAEATGTR	S(0)S(0)DRDS(-2.24)MNKEAEAT(-41.51)GT(-42.66)R	1	3	-0.21168	0	0	0	0	0	0	0	0	0	0	0	0	0	0	0	0	0	0	398	398	2836	3123			41011	41526	Service_Sonenberg_150119_2
P59672	399	P59672	P59672	Ankyrin repeat and SAM domain-containing protein 1A	Anks1a		0.384988	0	3.04251e-05	50.752	41.469	45.413		S	AVSCHSLDSTASGRSSDRDSMNKEAEATGTR	X;X;X;X;X;X;X;X;X;X;X;X;X;X;X;X;X;X;X;X;X;X;X;X;X;X;X;X;X;X;X	XXXXXXXXXXXXXXXXXXXXXXXXXXXXXXX	S(0.385)S(0.385)DRDS(0.23)MNKEAEATGTR	S(0)S(0)DRDS(-2.24)MNKEAEAT(-41.51)GT(-42.66)R	2	3	-0.21168	0	0	0	0	0	0	0	0	0	0	0	0	0	0	0	0	0	0	399	399	2836	3123			41011	41526	Service_Sonenberg_150119_2
P59672	403	P59672	P59672	Ankyrin repeat and SAM domain-containing protein 1A	Anks1a		0.560765	4.07115	8.19418e-10	69.255	54.326	69.255	1	S	HSLDSTASGRSSDRDSMNKEAEATGTRAAGV	X;X;X;X;X;X;X;X;X;X;X;X;X;X;X;Phospho (STY);X;X;X;X;X;X;X;X;X;X;X;X;X;X;X	XXXXXXXXXXPPPPPPPPPPPPPPPPPXXXX	S(0.22)S(0.22)DRDS(0.561)MNKEAEATGTR	S(-4.07)S(-4.07)DRDS(4.07)MNKEAEAT(-62.79)GT(-66.13)R	6	3	0.085078	0	0	993610	0	0	0	3469400	0	0	2041900	1799500	0	2017600	0	0	0	0	0	403	403	2836	3123	41012;41014;41015;41016;41017	41527	41012	41527	Service_Sonenberg_150119_7
P59764	1726	P59764	P59764	Dedicator of cytokinesis protein 4	Dock4		0.997537	26.0749	0.0383339	41.704	26.56	41.704		S	LLSDKHKHSRENSCLSPRDRPCSAIYPTPVE	X;X;X;X;X;X;X;X;X;X;X;X;X;X;X;Phospho (STY);X;X;X;X;X;X;X;X;X;X;X;X;X;X;X	XXXXXXXXXXPPPPPPPPXXXXXXXXXXXXX	ENS(0.002)CLS(0.998)PR	ENS(-26.07)CLS(26.07)PR	6	2	-0.14625	562490	0	0	0	0	959400	1191400	313840	715400	696880	1152500	766630	869310	0	0	1206800	1677800	0	1726	1726	702	763	9771;9772;9773;9774;9775;9776;9777;9778;9779;9780;9781	10393	9771	10393	Service_Sonenberg_150119_11
P59764	1817	P59764	P59764	Dedicator of cytokinesis protein 4	Dock4		0.811394	8.87927	0.000342235	75.941	64.581	75.941	1	S	RPTQTASPARHTTSVSPSPAGRSPLKGSVQS	X;X;X;X;X;X;X;X;X;X;X;X;X;X;X;Phospho (STY);X;X;X;X;X;X;X;X;X;X;X;X;X;X;X	XXXXXXXXXXPPPPPPPPPPPPXXXXXXXXX	HT(0.004)T(0.105)S(0.071)VS(0.811)PS(0.009)PAGR	HT(-23.15)T(-8.88)S(-10.59)VS(8.88)PS(-19.61)PAGR	6	2	1.4989	1236600	307830	0	0	0	477880	1434400	644500	1432700	743320	631870	349460	1205600	1786200	757440	0	466710	0	1817	1817	1164	1267	16262;16263;16264;16265;16266;16267;16268;16269;16270;16271;16272;16273;16274	16662;16663;16664	16263	16663	Service_Sonenberg_150119_7
P59808	500	P59808	P59808	SAM and SH3 domain-containing protein 1	Sash1		0.998597	28.523	0.00283468	58.592	29.865	49.3	1	S	PDSEHVDKPKLKAGGSVESLRSSLSGQSSMS	X;X;X;X;X;X;X;X;X;X;X;X;X;X;X;Phospho (STY);X;X;X;X;X;X;X;X;X;X;X;X;X;X;X	XXXXXXXXXXXXPPPPPPPPPXXXXXXXXXX	AGGS(0.999)VES(0.001)LR	AGGS(28.52)VES(-28.52)LR	4	2	1.0929	4139200	3529600	2938600	0	3009700	3307800	0	2972800	0	0	3443800	0	4251200	2508900	0	0	0	0	500	500	95	101	1291;1292;1293;1294;1295;1296;1297;1298;1299	1337;1338;1339;1340;1341;1342;1343;1344;1345;1346;1347;1348;1349;1350;1351;1352	1297	1349	Service_Sonenberg_150119_11
P59808	723	P59808	P59808	SAM and SH3 domain-containing protein 1	Sash1		0.858428	7.83051	8.22983e-08	83.499	74.067	83.499	1	S	QGLSGRSPRDSGCYESSENLENAKTHKPSVL	X;X;X;X;X;X;X;X;X;X;X;X;X;X;X;Phospho (STY);X;X;X;X;X;X;X;X;X;X;X;X;X;X;X	XXXXXXXXXPPPPPPPPPPPPPPPXXXXXXX	DSGCYES(0.858)S(0.141)ENLENAK	DS(-46.52)GCY(-39.96)ES(7.83)S(-7.83)ENLENAK	7	2	0.16434	3000700	2645400	0	1124000	1439700	1681900	5122400	2345000	2675900	0	1992000	1915300	0	2115000	0	0	0	1248500	723	723	512	559	7187;7188;7190;7191;7192;7193;7194;7196;7198;7201;7202;7203	7996;7997;7998;7999;8001;8002;8003;8004;8005;8006;8007;8008;8010;8011;8013;8017	7194	8008	Service_Sonenberg_150119_9
P59808	724	P59808	P59808	SAM and SH3 domain-containing protein 1	Sash1		0.572042	1.33233	0.000182014	50.155	35.465	50.155	1	S	GLSGRSPRDSGCYESSENLENAKTHKPSVLS	X;X;X;X;X;X;X;X;X;X;X;X;X;X;X;Phospho (STY);X;X;X;X;X;X;X;X;X;X;X;X;X;X;X	XXXXXXXXPPPPPPPPPPPPPPPXXXXXXXX	DS(0.001)GCY(0.006)ES(0.421)S(0.572)ENLENAK	DS(-26.48)GCY(-19.97)ES(-1.33)S(1.33)ENLENAK	8	2	-0.24186	0	0	0	0	0	0	0	0	0	3397300	0	0	0	0	0	0	1978100	0	724	724	512	559	7195;7200	8009;8015;8016	7200	8016	Service_Sonenberg_150119_17
P59808	435	P59808	P59808	SAM and SH3 domain-containing protein 1	Sash1		1	106.618	0.000101431	110.38	97.028	106.62	1	S	PAGKEGDFVYKEVIKSPPAPRISLGKKVRSV	X;X;X;X;X;X;X;X;X;X;X;X;X;X;X;Phospho (STY);X;X;X;X;X;X;X;X;X;X;X;X;X;X;X	XXXXXXXXXXXPPPPPPPPPPXXXXXXXXXX	EVIKS(1)PPAPR	EVIKS(106.62)PPAPR	5	2	0.049297	2745500	2100400	2155800	1679000	2531000	1945100	2369600	2116200	2081300	3333700	2161200	2287600	2418200	2420400	2010000	1810600	3643700	1929200	435	435	769	839	10819;10820;10821;10822;10823;10824;10825;10826;10827;10828;10829;10830;10831;10832;10833;10834;10835;10836;10837;10838;10839;10840;10841;10842	11543;11544;11545;11546;11547;11548;11549;11550;11551;11552;11553;11554;11555;11556;11557;11558;11559;11560;11561;11562;11563;11564;11565;11566;11567;11568;11569;11570;11571;11572;11573;11574;11575;11576;11577;11578;11579;11580;11581;11582;11583;11584;11585;11586;11587;11588;11589;11590;11591;11592;11593	10842	11593	Service_Sonenberg_150119_18
P59808	892	P59808	P59808	SAM and SH3 domain-containing protein 1	Sash1		1	51.9491	0.0169435	55.112	26.903	51.949	1	S	DPTADVMLLTQSKRFSDPPKTMAKKLDGSVV	X;X;X;X;X;X;X;X;X;X;X;X;X;X;X;Phospho (STY);X;X;X;X;X;X;X;X;X;X;X;X;X;X;X	XXXXXXXXXXXXXPPPPPPPXXXXXXXXXXX	RFS(1)DPPK	RFS(51.95)DPPK	3	2	0.3335	0	0	0	0	0	0	0	0	0	0	0	0	0	0	0	0	0	0	892	892	2090	2297	29784;29785;29786;29787;29788	29258;29259;29260;29261;29262	29788	29262	Service_Sonenberg_150119_15
P59808	831	P59808	P59808	SAM and SH3 domain-containing protein 1	Sash1		0.973575	15.6636	3.18917e-08	88.561	76.396	88.561	1	S	TLEGPEPVESWPRSHSLDDLQGDADVGKNVP	X;X;X;X;X;X;X;X;X;X;X;X;X;X;X;Phospho (STY);X;X;X;X;X;X;X;X;X;X;X;X;X;X;X	XXXXXXXXXXXXXPPPPPPPPPPPPPPPXXX	S(0.026)HS(0.974)LDDLQGDADVGK	S(-15.66)HS(15.66)LDDLQGDADVGK	3	2	0.37361	3451600	0	5069500	1316900	0	0	3915900	2993400	0	0	0	0	0	0	2933100	0	0	1736900	831	831	2562	2821	36809;36810;36811;36812;36813;36814;36815;36816;36817;36818;36819;36820;36821	36839;36840;36841;36842;36843;36844;36845;36846;36847;36848;36849;36850	36809	36839	Service_Sonenberg_150119_1
P59808	805	P59808	P59808	SAM and SH3 domain-containing protein 1	Sash1		0.999998	56.5211	0.00378084	81.297	62.566	81.297	1	S	SCDVPSVTDLSKNRRSLPVSICRSCETLEGP	X;X;X;X;X;X;X;X;X;X;X;X;X;X;X;Phospho (STY);X;X;X;X;X;X;X;X;X;X;X;X;X;X;X	XXXXXXXXXXXXXXXPPPPPPPPXXXXXXXX	S(1)LPVSICR	S(56.52)LPVS(-56.52)ICR	1	2	0.1998	3465900	3426600	0	1234000	2073500	2649700	0	2651700	2122300	1847500	1230800	1716000	0	0	2252100	1193200	1615900	2015500	805	805	2646	2912	37988;37989;37990;37991;37992;37993;37994;37995;37996;37997;37998;37999;38000;38001	38202;38203;38204;38205;38206;38207;38208;38209;38210;38211;38212;38213;38214;38215	37989	38204	Service_Sonenberg_150119_2
P59808	400	P59808	P59808	SAM and SH3 domain-containing protein 1	Sash1		0.913755	10.2653	0.00172168	46.481	40.999	42.789	1	S	EMKKGLGSLSHGRTCSFGGFDLTNRSLHVGS	X;X;X;X;X;X;X;X;X;X;X;X;X;X;X;Phospho (STY);X;X;X;X;X;X;X;X;X;X;X;X;X;X;X	XXXXXXXXXXXXXPPPPPPPPPPPPXXXXXX	T(0.086)CS(0.914)FGGFDLTNR	T(-10.27)CS(10.27)FGGFDLT(-35.06)NR	3	2	-0.80217	905310	0	1107600	616510	0	0	519220	0	636450	479950	0	0	0	0	814120	708250	0	0	400	400	3041	3347	44037;44038;44039;44040;44041;44042;44043;44044	44924;44925;44926;44927	44038	44925	Service_Sonenberg_150119_7
P60710;P63268;P68134;P68033;P62737;P63260	323;324;325;325;325;323	P60710;P63268;P63260	P60710	Actin, cytoplasmic 1;Actin, cytoplasmic 1, N-terminally processed;Actin, gamma-enteric smooth muscle;Actin, alpha skeletal muscle;Actin, alpha cardiac muscle 1;Actin, aortic smooth muscle;Actin, cytoplasmic 2;Actin, cytoplasmic 2, N-terminally processed	Actb;Actg2;Acta1;Actc1;Acta2;Actg1		0.806212	6.28165	0.00324468	45.357	28.98	41.242	1	S	GIADRMQKEITALAPSTMKIKIIAPPERKYS	X;X;X;X;X;X;X;X;X;X;X;X;X;X;X;Phospho (STY);X;X;X;X;X;X;X;X;X;X;X;X;X;X;X	XXXXXXXXPPPPPPPPPPPXXXXXXXXXXXX	EIT(0.004)ALAPS(0.806)T(0.19)MK	EIT(-23.05)ALAPS(6.28)T(-6.28)MK	8	2	-1.4935	0	480400	0	0	0	454510	0	425870	437820	0	0	428170	337290	408500	506070	420110	0	432620	323;324;323	323	645	703	9038;9039;9040;9041;9042;9043;9044;9045;9046;9047	9750;9751	9039	9751	Service_Sonenberg_150119_18
[truncated: 2,767 more rows]
[truncated: 9 more columns]

## Sheet: WT60 vs WT0 up and downregulate
Significant	#NAME?	Difference	Proteins	Positions within proteins	Leading proteins	Protein	Protein names	Gene names	Sequence window	Symbol color	Symbol type	Symbol size	Show label	Amino acid	Charge	Reverse	Potential contaminant	Student's T-test Significant WT60_WT0	Student's T-test significant	Filter	Filter_	Localization prob	PEP	Score	Delta score	Score for localization	Mass error [ppm]	Intensity	Position	-Log Student's T-test p-value WT60_WT0	Student's T-test q-value WT60_WT0	Student's T-test Difference WT60_WT0	Student's T-test Test statistic WT60_WT0	Intensity 1	Intensity 2	Intensity 3	Intensity 4	Intensity 5	Intensity 6	Intensity 7	Intensity 8	Intensity 9	Intensity 10	Intensity 11	Intensity 12	Intensity 13	Intensity 14	Intensity 15	Intensity 16
[truncated: 189 more rows]
[truncated: 2 more columns]

[truncated: 6 more sheets: KIKO0 vs WT0 up and downregulat, KIKO60 vs KIKO0 up and downregu, KIKO60 vs WT60 up and downregul, DKO vs WT 60 up and downregulat, DKO0 vs WT0 up and downregulate, DKO60 vs DKO0 up and downregula]
