# Supplementary material for: p38γ and p38δ modulate innate immune response by regulating MEF2D activation
Source: eLife journal article supplement (doi:10.7554/elife.86200), 2023-07-17
Supplement: supp [file Source data Figu S3a.xlsx]

## Sheet: Sheet1
Go-Biological process	Genes
Defense response to virus	IFI206, CXCL9, RSAD2, IFNA1, IFNB1, MX2, MX1, IFNA2, ACOD1, IFIT1BL1, IFIT1, IFIT3, IFIT2, CXCL10, IL6, IL12B, IFIT3B
Cellular response to IFN-beta	IFI208, TGTP2, IFI206, IFI205, IFNB1, CAPN2, ACOD1, IFI202B, IFIT1, IFIT3, IIGP1
Defense response	CXCL10, CXCL9, TGTP2, IFNA1, IFNB1, IFNA2, ACOD1, IIGP1, CAMP
Inflammatory response	GBP5, CXCL9, NOS2, ACOD1, IL27, IFI202B, CXCL10, IL6, CXCL11, ITGB2L, IL1B, CCL5, CHIL1
Immune response	H2-T24, CXCL9, GM43302, TNFSF15, H2-M2, H2-Q6, LIF, CXCL10, IL6, CXCL11, IL1B, CCL5, CLEC4E
innate immune response	TGTP2, RSAD2, TRIM30C, MX1, ACOD1, IL27, IFI202B, IFIT1, IFIT3, IIGP1, IFIT2, PTX3, CLEC4E, CAMP, CD177
Negative regulation of viral genome replication	IFI206, RSAD2, IFNB1, CCL5, MX2
Positive regulation of IL-8 production	IL6, NOS2, IL1B, CHIL1, CAMP
Positive regulation of IL-1-beta production	GBP5, IL6, IFI206, IFI205, IFI202B
Chemokine-mediated signaling pathway	CXCL10, CXCL9, CXCL11, CCL5
